# Supplementary material for: Institutionalizing delay: foundation funding and the creation of U.S. climate change counter-movement organizations
Source: Springer Nature journal article supplement (doi:10.1007/s10584-013-1018-7), 2013-12-20
Supplement: 10584_2013_1018_MOESM1_ESM.pdf [file 10584_2013_1018_MOESM1_ESM.pdf]

## Supplementary Online Material

### Table of Contents

|                                                                                                       |            |
|-------------------------------------------------------------------------------------------------------|------------|
| <b>S-1 Coding Instructions – U.S. National Climate Counter-movement Organizations</b>                 | <b>2</b>   |
| <b>S-2 Coding Sheet – U.S. National Climate Counter-movement Organizations</b>                        | <b>3</b>   |
| <b>S-3 U.S. National Climate Counter-movement Organizations</b>                                       | <b>4</b>   |
| <b>S-4 U.S. National Climate Change Counter-movement Income Data 2003 – 2010</b>                      | <b>5</b>   |
| <b>S-5 U.S. National Climate Change Counter-movement Income Distribution 2003 – 2010</b>              | <b>36</b>  |
| <b>S-6 Foundation Funding of U.S. National Climate Counter-movement By Foundation and Year</b>        | <b>39</b>  |
| <b>S-7 .Foundation Funding of U.S. National Climate Counter-movement By Organization and Year</b>     | <b>43</b>  |
| <b>S-8 Foundation Funding of U.S. National Climate Counter-movement Organizations – By Foundation</b> | <b>45</b>  |
| <b>S-9 Foundation Funding of U.S. National Climate Counter-movement Organizations – By Recipient</b>  | <b>79</b>  |
| <b>S 10 Climate Change Counter-movement Network Dimensions</b>                                        | <b>113</b> |
| <b>S 11 Climate Change Counter-movement Network - Relative Node Strength</b>                          | <b>114</b> |
| <b>S 12 Climate Change Counter-movement Network - Relative Node Degree</b>                            | <b>115</b> |
| <b>Figure S-1</b>                                                                                     | <b>116</b> |
| <b>Methods Appendix</b>                                                                               | <b>117</b> |

## S-1 Coding Instructions – U.S. National Climate Counter-movement Organizations

The purpose of this organizational coding is to identify the organizations that make up the climate counter-movement in the United States. Definition of climate counter-movement – organizations that advocate against government policies to take substantive action to mitigate climate change. Specifically, this movement opposes mandatory restrictions on GHG emissions, either through regulations or a carbon fee. The advocacy of this community contains several different arguments, such as:

1. Climate change is not occurring.
2. Climate change is occurring, but it is not due to humans.
3. Climate change is occurring, and it is due to humans. But it does not pose a sufficient threat to justify large scale action or climate change will be beneficial.
4. Climate change is occurring, and it is due to humans. But it is too expensive to deal with.
5. Climate change is occurring, and it is due to humans. However, voluntary actions will be sufficient to address this issue.

Your task is to review information about this organization, and assign a code that describes the role of this organization in this movement. There are four codes that you can assign to the organization:

1. Climate Counter-movement single focus organization - climate change sole focus
2. Climate Counter-movement multiple focus organization – climate change substantive focus, but not sole focus
3. Climate Counter-movement Peripheral Organization – climate change minor focus
4. Not Climate Counter-movement Organization

### Coding Steps

To code an organization, the first step is to examine its participation in several well-known climate counter-movement events or coalitions. These are participation or sponsorship of the ICC conference, or participation in the Global Climate Coalition, Alliance for Climate Strategies, or the Cooler Heads Coalition. Generally, participation in these coalitions signifies a minimum coding of 3 for this organization. Information about participation in these events or coalitions is available on the organization Excel spread sheet. Enter the results of this review in the *External Activities* blocks on the coding sheet.

The second step is to do a Google search of the organization. Generally, this will turn up the site of the organization, and in a large majority of cases, a Wikipedia site, and organizational description sites developed by both “Source Watch” and Greenpeace. You should read these descriptions and first enter the type of organization in the *Nature of Organization* box on the coding sheet.

You then need to decide if there is evidence that this organization is generally perceived to be part of the climate counter-movement. You should enter the results on the *External Web Site Descriptions* blocks.

The fourth step is to go to the organization’s web site. You should read the organization’s mission (usually listed in the tab labeled “about us.”) Then look over the web site, looking for statements regarding the extent and nature of the organization’s involvement with climate change. You should answer the questions on the coding sheet under the headings of *Organization Web Site Review*, *Nature of Arguments Presented Regarding Climate Change*, and *Actions Advocated to Address Climate Change*.

The fifth step is to review the most recent copy of the organization’s IRS 990 form. Go to [www.guidestar.org](http://www.guidestar.org), and enter the organization’s name. This will bring up information regarding the organization, as well as links to the IRS forms of the organization. Open the most recently available IRS 990 form, and fill out the blocks in the IRS 990 Review section of the coding form.

The final step is to code the organization into one of four categories. Based on the information obtained about the organization, enter a code of 1-4 in the block *Organizational Coding*.

## S-2 Coding Sheet – U.S. National Climate Counter-movement Organizations

| Climate Change Counter-movement Organization Coding Sheet                                                                                                                                                                              |               |                |
|----------------------------------------------------------------------------------------------------------------------------------------------------------------------------------------------------------------------------------------|---------------|----------------|
| Name of Organization _____                                                                                                                                                                                                             |               |                |
| Nature of Organization<br>1. Advocacy Org<br>2. Think Tank/Research Institute<br>3. Trade Association<br>4. Coalition<br>5. University Affiliated Research Institute<br>6. Professional Association<br>7. Foundation<br>8. Other _____ |               |                |
| <b>External Activities</b>                                                                                                                                                                                                             | <b>No</b>     | <b>Yes</b>     |
| 1. Has the organization sponsored the Heartland Conference?                                                                                                                                                                            |               |                |
| 2. Has a representative from this organization spoken at the Heartland Conference?                                                                                                                                                     |               |                |
| 3. Did the organization belong to the Global Climate Coalition?                                                                                                                                                                        |               |                |
| 4. Does the organization belong to the Alliance for Climate Strategies?                                                                                                                                                                |               |                |
| 5. Does the organization belong to the Cooler Heads Coalition?                                                                                                                                                                         |               |                |
| <b>External Web Site Descriptions</b>                                                                                                                                                                                                  |               |                |
| 1. Is the org described on a Wikipedia Site? If so, does it appear to be a counter-movement org?                                                                                                                                       |               |                |
| 2. Is the org described on a Source Watch page? If so, does it appear to be a counter-movement org?                                                                                                                                    |               |                |
| 3. Is the org described on a Greenpeace page? If so, does it appear to be a counter-movement org?                                                                                                                                      |               |                |
| <b>Organization Web Site Review</b>                                                                                                                                                                                                    |               |                |
| 1. Is global warming/climate change mentioned in the orgs purpose statement, mission, or objectives?                                                                                                                                   |               |                |
| 2. Are there other issues mentioned in the organization's purpose/mission/objectives?                                                                                                                                                  |               |                |
| 3. Are statements, issue advisories, editorial statements or reports available on the web site regarding global warming/climate change?                                                                                                |               |                |
| <b>Nature of Arguments Presented Regarding Climate Change</b>                                                                                                                                                                          | <b>Absent</b> | <b>Present</b> |
| 1. Climate change is a hoax/not happening                                                                                                                                                                                              |               |                |
| 2. The science of climate change is uncertain                                                                                                                                                                                          |               |                |
| 3. Climate change is not caused by human activities                                                                                                                                                                                    |               |                |
| 4. Climate change is caused by human activities, but it is not of concern                                                                                                                                                              |               |                |
| 5. Climate change will be beneficial for humans                                                                                                                                                                                        |               |                |
| 6. Addressing climate change is too expensive                                                                                                                                                                                          |               |                |
| 7. There are other problems that should be addressed before climate change                                                                                                                                                             |               |                |
| 8. Other                                                                                                                                                                                                                               |               |                |
| <b>Actions Advocated to Address Climate Change</b>                                                                                                                                                                                     | <b>Absent</b> | <b>Present</b> |
| 1. No action                                                                                                                                                                                                                           |               |                |
| 2. Voluntary action                                                                                                                                                                                                                    |               |                |
| 3. Expansion/increase use of carbon energy sources                                                                                                                                                                                     |               |                |
| 4. Technology research                                                                                                                                                                                                                 |               |                |
| 5. Energy efficiency                                                                                                                                                                                                                   |               |                |
| 6. Price on Carbon (Carbon Tax or Cap & Trade)                                                                                                                                                                                         |               |                |
| 7. Carbon Regulations                                                                                                                                                                                                                  |               |                |
| 8. Government Investments                                                                                                                                                                                                              |               |                |
| 9. Government Subsidies                                                                                                                                                                                                                |               |                |
| <b>IRS 990 Review</b>                                                                                                                                                                                                                  | <b>No</b>     | <b>Yes</b>     |
| 1. Is global warming/climate change mentioned in the organization's mission? (Line 1, page 2)                                                                                                                                          |               |                |
| 2. Is there a separate statement on global warming /climate change in the organization's achievements? (Line 4, page 2)                                                                                                                |               |                |
| 3. Is there a specific funding amount listed that is identified as being spent on global warming/climate change activities? (Line 4, page 2)                                                                                           |               |                |
| 4. If funding on global warming/climate change is listed, enter amount.                                                                                                                                                                |               |                |
| 5. What are the total expenses reported for the most current year IRS 990? (Line 18, page 1)                                                                                                                                           |               |                |
| <b>Organizational Coding</b>                                                                                                                                                                                                           |               |                |
| 1. Climate Counter-movement Single Focus Organization<br>2. Climate Counter-movement Multiple Focus Organization<br>3. Climate Counter-movement Peripheral Organization<br>4. Not Climate Counter-movement Organization                |               |                |

Coded By \_\_\_\_\_ Date \_\_\_\_\_ Entered By \_\_\_\_\_ Date \_\_\_\_\_

### S-3 U.S. National Climate Counter-movement Organizations

|                                                                   |                                                                      |                                                  |
|-------------------------------------------------------------------|----------------------------------------------------------------------|--------------------------------------------------|
| 60 Plus                                                           | Committee For A Constructive Tomorrow                                | International Climate And Environmental Change   |
| Advancement Of Sound Science Center Inc. The)                     | Competitive Enterprise Institute                                     | International Climate Science Coalition          |
| Alliance For Climate Strategies (ACS)                             | Congress Of Racial Equality                                          | International Policy Network                     |
| American Coal Foundation                                          | Consumer Alert/National Consumer Coalition                           | James Madison Institute                          |
| American Coalition For Clean Coal Electricity (ACCCE)             | Consumer Energy Alliance                                             | John Locke Foundation                            |
| American Conservative Union Foundation                            | Cooler Heads Coalition                                               | Landmark Legal Foundation                        |
| American Council For Capital Formation                            | Cornwall Alliance For The Stewardship Of Creation                    | Manhattan Institute For Policy Research          |
| American Council For Capital Formation Center For Policy Research | Edison Electric Institute                                            | Manhattan Libertarian Party                      |
| American Energy Alliance/Institute For Energy Research            | Energy Citizens                                                      | Media Research Center                            |
| American Energy Freedom Center                                    | Energy Makes America Great                                           | Mercatus Center, George Mason University         |
| American Enterprise Institute For Public Policy Research          | Environmental Literacy Council                                       | Mountain States Legal Foundation                 |
| American Farm Bureau                                              | Federation For American Coal, Energy And Security                    | National Association Of Manufacturers            |
| American Friends Of The Institute Of Economic Affairs             | Free Enterprise Action Institute/Free Enterprise Education Institute | National Center For Policy Analysis              |
| American Gas Association                                          | Freedom Action                                                       | National Center For Public Policy Research       |
| American Legislative Exchange Council                             | Freedom Works                                                        | National Mining Association                      |
| American Natural Gas Alliance                                     | Freedom Works Foundation                                             | National Petrochemical And Refiners Association  |
| American Petroleum Institute                                      | Friends Of Coal                                                      | National Petroleum Council                       |
| American Policy Center                                            | Frontiers Of Freedom Institute And Foundation                        | National Rural Electric Cooperative Association  |
| American Tradition Institute                                      | George C. Marshall Institute                                         | National Taxpayers Union                         |
| Americans For Balanced Energy Choices (ABEC)                      | Global Climate Coalition                                             | National Taxpayers Union Foundation              |
| Americans For Prosperity/Americans For Prosperity Foundation      | Global Climate Information Project                                   | Oklahoma Council Of Public Affairs               |
| Annapolis Center For Science-Based Public Policy                  | Global Warming Initiative                                            | Oregon Institute Of Science And Medicine         |
| Association Of Global Automobile Manufacturers                    | Greening Earth Society                                               | Pacific Research Institute For Public Policy     |
| Atlas Economic Research Foundation                                | Heartland Institute                                                  | Plants Need Co2                                  |
| Capital Research Center/Greenwatch                                | Heritage Foundation                                                  | Reason Foundation/Reason Public Policy Institute |
| Cascade Policy Institute                                          | Hoover Institution                                                   | Responsible Resources                            |
| Cato Institute                                                    | Hudson Institute                                                     | Science And Environment Policy Project           |
| Center For The Defense Of Free Enterprise                         | Ice Age Now                                                          | Science And Public Policy Institute              |
| Center For The Study Of Carbon Dioxide And Global Change/CO2      | Independence Institute                                               | Southeastern Legal Foundation                    |
| Chamber Of Commerce Of The United States Of America               | Independent Institute                                                | Sovereignty International                        |
| Citizen's Coalition On Global Climate Policy                      | Independent Petroleum Association Of America                         | State Policy Network                             |
| Citizens For Affordable Energy                                    | Independent Women's Forum                                            | Surface Stations. Org                            |
| Climate Audit                                                     | Industrial Energy Consumers Of America                               | Texas Public Policy Foundation                   |
| Climate Science Coalition Of America                              | Information Council On The Environment                               | Thomas Jefferson Institute For Public Policy     |
| Climate Strategies Watch                                          | Institute For Biospheric Research                                    | TS August/The Second Of August                   |
| CO2 Is Green                                                      | Institute For Energy Research                                        | Washington Policy Center                         |
| Coalition For American Jobs                                       | Institute For Liberty                                                | Western Fuels Association                        |
| Coalition For Vehicle Choice                                      | Institute For The Study Of Earth And Man                             | World Climate Report                             |
| Coalition To Preserve American Security And Sovereignty           | Intermountain Rural Electric Association                             | World Coal Association                           |
| Collegians for a Constructive Tomorrow                            |                                                                      |                                                  |

**S-4 U.S. National Climate Change Counter-movement Income Data 2003 – 2010**

| Year | Name                                                 | EIN       | Total Revenue | Total Contributions | Program Service Revenue | Membership Dues & Assessments | Investment Income | Other Income | Grant Income | Focus Level | 501 C Subcode |
|------|------------------------------------------------------|-----------|---------------|---------------------|-------------------------|-------------------------------|-------------------|--------------|--------------|-------------|---------------|
| 2003 | 60-PLUS ASSOCIATION INC                              | 541564919 | 12,027,390    | 12,007,458          | 0                       | 0                             | 2,301             | 17,631       | 0            | 2           | 4             |
| 2004 | 60-PLUS ASSOCIATION INC                              | 541564919 | 1,155,708     | 1,138,081           | 0                       | 0                             | 2,205             | 15,422       | 0            | 2           | 4             |
| 2005 | 60-PLUS ASSOCIATION INC                              | 541564919 | 540,514       | 537,041             | 0                       | 0                             | 2,527             | 946          | 0            | 2           | 4             |
| 2006 | 60-PLUS ASSOCIATION INC                              | 541564919 | 1,897,258     | 1,882,062           | 0                       | 0                             | 0                 | 15,196       | 0            | 2           | 4             |
| 2007 | 60-PLUS ASSOCIATION INC                              | 541564919 | 1,228,446     | 937,649             | 0                       | 0                             | 0                 | 290,797      | 0            | 2           | 4             |
| 2008 | 60-PLUS ASSOCIATION INC                              | 541564919 | 1,919,575     | 1,886,825           | 0                       | 0                             | 0                 | 32,750       | 143,000      | 2           | 4             |
| 2009 | 60-PLUS ASSOCIATION INC                              | 541564919 | 1,819,507     | 1,815,145           | 4,587                   | 0                             | 0                 | 0            | 35,000       | 2           | 4             |
| 2010 | 60-PLUS ASSOCIATION INC                              | 541564919 | 16,009,933    | 16,006,378          | 629                     | 0                             | 2,926             | 0            | 25,000       | 2           | 4             |
| 2003 | ADVANCEMENT OF SOUND SCIENCE CENTER INC. THE (TSSAC) | 521823181 | 2,837         | 28,000              | 0                       | 0                             | -25,163           | 0            |              | 2           | 3             |
| 2004 | ADVANCEMENT OF SOUND SCIENCE CENTER INC. THE (TSSAC) | 521823181 | 53,683        | 53,500              | 0                       | 0                             | 183               | 0            |              | 2           | 3             |
| 2005 | ADVANCEMENT OF SOUND SCIENCE CENTER INC. THE (TSSAC) | 521823181 | 48,262        | 48,000              | 0                       | 0                             | 262               | 0            |              | 2           | 3             |
| 2003 | AMERICAN COAL FOUNDATION                             | 521236554 | 252,200       | 223,229             | 26,029                  | 0                             | 2,942             | 0            | 0            | 2           | 3             |
| 2004 | AMERICAN COAL FOUNDATION                             | 521236554 | 154,297       | 139,445             | 11,832                  | 0                             | 3,020             | 0            | 0            | 2           | 3             |
| 2005 | AMERICAN COAL FOUNDATION                             | 521236554 | 270,268       | 262,428             | 4,670                   | 0                             | 3,170             | 0            | 0            | 2           | 3             |
| 2006 | AMERICAN COAL FOUNDATION                             | 521236554 | 240,709       | 227,075             | 10,668                  | 0                             | 2,966             | 0            | 0            | 2           | 3             |
| 2007 | AMERICAN COAL FOUNDATION                             | 521236554 | 256,533       | 236,500             | 17,203                  | 0                             | 2,830             | 0            | 0            | 2           | 3             |
| 2008 | AMERICAN COAL FOUNDATION                             | 521236554 | 330,387       | 312,500             | 15,010                  | 0                             | 2,877             | 0            | 0            | 2           | 3             |
| 2009 | AMERICAN COAL FOUNDATION                             | 521236554 | 339,476       | 326,000             | 10,543                  | 0                             | 2,933             | 0            | 0            | 2           | 3             |
| 2010 | AMERICAN COAL FOUNDATION                             | 521236554 | 312,535       | 309,600             | 0                       | 0                             | 2,935             | 0            | 0            | 2           | 3             |

| Year | Name                                                                        | EIN       | Total Revenue | Total Contributions | Program Service Revenue | Membership Dues & Assessments | Investment Income | Other Income | Grant Income | Focus Level | 501 C Subcode |
|------|-----------------------------------------------------------------------------|-----------|---------------|---------------------|-------------------------|-------------------------------|-------------------|--------------|--------------|-------------|---------------|
| 2003 | AMERICAN COALITION FOR CLEAN COAL ELECTRICITY/CENTER FOR ENERGY AND ECONOMY | 521799853 | 5,093,543     | 115,000             | 182,000                 | 4,754,158                     | 0                 | 3,865        | 0            | 1           | 6             |
| 2004 | AMERICAN COALITION FOR CLEAN COAL ELECTRICITY/CENTER FOR ENERGY AND ECONOMY | 521799853 | 5,083,370     | 110,000             | 0                       | 4,907,399                     | 0                 | 26,449       | 0            | 1           | 6             |
| 2005 | AMERICAN COALITION FOR CLEAN COAL ELECTRICITY/CENTER FOR ENERGY AND ECONOMY | 521799853 | 6,993,423     | 8,600               | 0                       | 6,803,471                     | 0                 | 44,251       | 0            | 1           | 6             |
| 2006 | AMERICAN COALITION FOR CLEAN COAL ELECTRICITY/CENTER FOR ENERGY AND ECONOMY | 521799853 | 7,802,486     | 175,062             | 0                       | 7,203,781                     | 0                 | 234,787      | 0            | 1           | 6             |
| 2007 | AMERICAN COALITION FOR CLEAN COAL ELECTRICITY/CENTER FOR ENERGY AND ECONOMY | 521799853 | 7,477,958     | 156,239             | 0                       | 7,063,499                     | 0                 | 34,910       | 0            | 1           | 6             |
| 2008 | AMERICAN COALITION FOR CLEAN COAL ELECTRICITY/CENTER FOR ENERGY AND ECONOMY | 521799853 | 46,960,008    | 39,751,563          | 0                       | 7,022,021                     | 155,139           | 0            | 0            | 1           | 6             |
| 2009 | AMERICAN COALITION FOR CLEAN COAL ELECTRICITY/CENTER FOR ENERGY AND ECONOMY | 521799853 | 53,733,277    | 45,666,347          | 0                       | 8,003,896                     | 31,359            | 31,675       | 0            | 1           | 6             |
| 2010 | AMERICAN COALITION FOR CLEAN COAL ELECTRICITY/CENTER FOR ENERGY AND ECONOMY | 521799853 | 45,307,620    | 35,335,357          | 0                       | 9,910,195                     | 42,102            | 19,966       | 0            | 1           | 6             |
| 2003 | AMERICAN CONSERVATIVE UNION FOUNDATION                                      | 521294680 | 745,654       | 745,562             | 0                       | 0                             | 92                | 0            | 31,000       | 2           | 3             |
| 2004 | AMERICAN CONSERVATIVE UNION FOUNDATION                                      | 521294680 | 763,590       | 751,838             |                         | 0                             | 237               | 11,515       | 8,250        | 2           | 3             |
| 2005 | AMERICAN CONSERVATIVE UNION FOUNDATION                                      | 521294680 | 1,068,592     | 1,122,919           | 0                       | 0                             | 1,565             | -55,892      | 99,000       | 2           | 3             |
| 2006 | AMERICAN CONSERVATIVE UNION FOUNDATION                                      | 521294680 | 1,124,590     | 1,120,575           | 0                       | 0                             | 4,015             | 0            | 46,500       | 2           | 3             |
| 2007 | AMERICAN CONSERVATIVE UNION FOUNDATION                                      | 521294680 | 1,189,045     | 1,189,045           |                         | 0                             | 0                 | 0            | 121,500      | 2           | 3             |
| 2008 | AMERICAN CONSERVATIVE UNION FOUNDATION                                      | 521294680 | 1,253,499     | 1,252,342           | 0                       | 0                             | 1,157             | 0            | 144,000      | 2           | 3             |
| 2009 | AMERICAN CONSERVATIVE UNION FOUNDATION                                      | 521294680 | 1,183,096     | 350,012             | 833,084                 | 0                             | 0                 | 0            | 103,000      | 2           | 3             |
| 2010 | AMERICAN CONSERVATIVE UNION FOUNDATION                                      | 521294680 | 1,351,773     | 288,670             | 1,063,103               | 0                             | 0                 | 0            | 62,000       | 2           | 3             |
| 2004 | AMERICAN COUNCIL FOR CAPITAL FORMATION                                      | 520991278 | 656,669       | 645,565             | 2,373                   |                               | 8,731             | 0            | 0            | 2           | 6             |
| 2005 | AMERICAN COUNCIL FOR CAPITAL FORMATION                                      | 520991278 | 1,124,983     | 1,117,912           | 405                     |                               | 3,146             | 1,960        | 25,000       | 2           | 6             |
| 2006 | AMERICAN COUNCIL FOR CAPITAL FORMATION                                      | 520991278 | 1,622,138     | 1,605,362           | 5,550                   |                               | 3,117             | 5,336        | 50,000       | 2           | 6             |
| 2007 | AMERICAN COUNCIL FOR CAPITAL FORMATION                                      | 520991278 | 1,843,281     | 1,810,712           | 5,465                   |                               | 8,365             | 18,739       | 50,000       | 2           | 6             |

| Year | Name                                                              | EIN       | Total Revenue | Total Contributions | Program Service Revenue | Membership Dues & Assessments | Investment Income | Other Income | Grant Income | Focus Level | 501 C Subcode |
|------|-------------------------------------------------------------------|-----------|---------------|---------------------|-------------------------|-------------------------------|-------------------|--------------|--------------|-------------|---------------|
| 2008 | AMERICAN COUNCIL FOR CAPITAL FORMATION                            | 520991278 | 1,593,494     | 1,581,244           | 1,750                   |                               | 10,500            | 0            | 200,000      | 2           | 6             |
| 2009 | AMERICAN COUNCIL FOR CAPITAL FORMATION                            | 520991278 | 1,616,879     | 1,601,632           | 11,219                  |                               | 4,028             | 0            | 150,000      | 2           | 6             |
| 2010 | AMERICAN COUNCIL FOR CAPITAL FORMATION                            | 520991278 | 1,604,599     | 1,579,050           | 17,000                  |                               | 214               | 8,335        | 10,000       | 2           | 6             |
| 2003 | AMERICAN COUNCIL FOR CAPITAL FORMATION CENTER FOR POLICY RESEARCH | 521091172 | 1,178,748     | 1,161,966           | 16,232                  | 0                             | 550               | 0            | 25,000       | 2           | 3             |
| 2004 | AMERICAN COUNCIL FOR CAPITAL FORMATION CENTER FOR POLICY RESEARCH | 521091172 | 1,177,239     | 1,174,767           | 1,718                   | 0                             | 754               | 0            | 325,000      | 2           | 3             |
| 2005 | AMERICAN COUNCIL FOR CAPITAL FORMATION CENTER FOR POLICY RESEARCH | 521091172 | 1,104,295     | 1,100,969           | 405                     | 0                             | 2,921             | 0            | 415,000      | 2           | 3             |
| 2006 | AMERICAN COUNCIL FOR CAPITAL FORMATION CENTER FOR POLICY RESEARCH | 521091172 | 603,763       | 594,700             |                         | 0                             | 9,063             | 0            | 0            | 2           | 3             |
| 2007 | AMERICAN COUNCIL FOR CAPITAL FORMATION CENTER FOR POLICY RESEARCH | 521091172 | 702,570       | 694,621             | 170                     | 0                             | 7,779             | 0            | 10,000       | 2           | 3             |
| 2008 | AMERICAN COUNCIL FOR CAPITAL FORMATION CENTER FOR POLICY RESEARCH | 521091172 | 642,807       | 641,500             |                         | 0                             | 1,307             | 0            | 70,000       | 2           | 3             |
| 2009 | AMERICAN COUNCIL FOR CAPITAL FORMATION CENTER FOR POLICY RESEARCH | 521091172 | 753,595       | 753,200             | 0                       | 0                             | 395               | 0            | 200,000      | 2           | 3             |
| 2010 | AMERICAN COUNCIL FOR CAPITAL FORMATION CENTER FOR POLICY RESEARCH | 521091172 | 773,749       | 773,749             | 0                       | 0                             | 0                 | 0            | 150,000      | 2           | 3             |
| 2008 | AMERICAN ENERGY ALLIANCE                                          | 262731617 | 1,816,078     | 1,816,078           |                         | 0                             | 0                 | 0            | 0            | 2           | 4             |
| 2009 | AMERICAN ENERGY ALLIANCE                                          | 262731617 | 1,725,615     | 1,719,513           | 0                       | 0                             | 1,251             | 4,851        | 0            | 2           | 4             |
| 2010 | AMERICAN ENERGY ALLIANCE                                          | 262731617 | 2,659,229     | 2,650,537           |                         | 0                             | 8,449             | 243          | 0            | 2           | 4             |
| 2010 | AMERICAN ENERGY FREEDOM CENTER                                    | 271519928 | 121,187       | 121,160             |                         | 0                             | 27                | 0            | 0            | 1           | 3             |
| 2003 | AMERICAN ENTERPRISE INSTITUTE FOR PUBLIC POLICY RESEARCH          | 530218495 | 24,934,545    | 22,848,885          | 1,557,647               | 0                             | 266,073           | 261,940      | 12,342,401   | 2           | 3             |
| 2004 | AMERICAN ENTERPRISE INSTITUTE FOR PUBLIC POLICY RESEARCH          | 530218495 | 20,124,853    | 18,058,612          | 1,426,814               | 0                             | 331,192           | 308,235      | 6,913,934    | 2           | 3             |
| 2005 | AMERICAN ENTERPRISE INSTITUTE FOR PUBLIC POLICY RESEARCH          | 530218495 | 33,671,688    | 31,870,055          | 1,197,506               | 0                             | 365,350           | 238,777      | 7,473,000    | 2           | 3             |
| 2006 | AMERICAN ENTERPRISE INSTITUTE FOR PUBLIC POLICY RESEARCH          | 530218495 | 27,796,809    | 20,643,029          | 1,215,330               | 0                             | 5,694,480         | 243,970      | 7,339,860    | 2           | 3             |
| 2007 | AMERICAN ENTERPRISE INSTITUTE FOR PUBLIC POLICY RESEARCH          | 530218495 | 40,910,056    | 34,063,743          | 1,229,931               | 0                             | 5,408,789         | 207,593      | 10,592,280   | 2           | 3             |

| Year | Name                                                     | EIN       | Total Revenue | Total Contributions | Program Service Revenue | Membership Dues & Assessments | Investment Income | Other Income | Grant Income | Focus Level | 501 C Subcode |
|------|----------------------------------------------------------|-----------|---------------|---------------------|-------------------------|-------------------------------|-------------------|--------------|--------------|-------------|---------------|
| 2008 | AMERICAN ENTERPRISE INSTITUTE FOR PUBLIC POLICY RESEARCH | 530218495 | 50,952,567    | 58,988,984          | 1,091,925               | 0                             | -9,057,309        | -71,033      | 11,469,267   | 2           | 3             |
| 2009 | AMERICAN ENTERPRISE INSTITUTE FOR PUBLIC POLICY RESEARCH | 530218495 | 52,524,255    | 47,301,847          | 688,724                 | 0                             | 4,533,684         | 0            | 16,506,740   | 2           | 3             |
| 2010 | AMERICAN ENTERPRISE INSTITUTE FOR PUBLIC POLICY RESEARCH | 530218495 | 13,185,521    | 12,427,227          | 483,412                 | 0                             | 274,882           | 0            | 16,071,689   | 2           | 3             |
| 2003 | AMERICAN FARM BUREAU FEDERATION                          | 360725160 | 21,337,860    | 0                   | 21,380                  | 19,319,283                    | 786,658           | 1,210,539    | 0            | 2           | 5             |
| 2004 | AMERICAN FARM BUREAU FEDERATION                          | 360725160 | 26,923,801    | 0                   | 22,016                  | 22,514,852                    | 478,788           | 3,908,145    | 0            | 2           | 5             |
| 2005 | AMERICAN FARM BUREAU FEDERATION                          | 360725160 | 25,118,298    | 0                   | 17,406                  | 22,883,068                    | 1,309,737         | 908,087      | 0            | 2           | 5             |
| 2006 | AMERICAN FARM BUREAU FEDERATION                          | 360725160 | 26,005,797    | 0                   | 0                       | 24,801,352                    | 1,313,240         | -108,795     | 0            | 2           | 5             |
| 2007 | AMERICAN FARM BUREAU FEDERATION                          | 360725160 | 26,574,804    | 0                   | 0                       | 24,934,388                    | 1,639,019         | 1,397        | 0            | 2           | 5             |
| 2008 | AMERICAN FARM BUREAU FEDERATION                          | 360725160 | 26,364,154    | 0                   | 0                       | 24,973,144                    | 1,247,286         | 143,724      | 0            | 2           | 5             |
| 2009 | AMERICAN FARM BUREAU FEDERATION                          | 360725160 | 26,115,079    | 0                   | 0                       | 25,110,656                    | 801,898           | 202,525      | 0            | 2           | 5             |
| 2010 | AMERICAN FARM BUREAU FEDERATION                          | 360725160 | 34,584,262    | 0                   | 0                       | 25,119,252                    | 747,823           | 8,717,187    | 0            | 2           | 5             |
| 2003 | AMERICAN FRIENDS OF THE INSTITUTE OF ECONOMIC AFFAIRS    | 541899539 | 139,054       | 139,054             | 0                       | 0                             | 0                 | 0            | 14,000       | 2           | 3             |
| 2004 | AMERICAN FRIENDS OF THE INSTITUTE OF ECONOMIC AFFAIRS    | 541899539 | 170,190       | 170,190             | 0                       | 0                             | 0                 | 0            | 134,150      | 2           | 3             |
| 2005 | AMERICAN FRIENDS OF THE INSTITUTE OF ECONOMIC AFFAIRS    | 541899539 | 197,750       | 197,750             | 0                       | 0                             | 0                 | 0            | 15,000       | 2           | 3             |
| 2006 | AMERICAN FRIENDS OF THE INSTITUTE OF ECONOMIC AFFAIRS    | 541899539 | 148,450       | 148,450             | 0                       | 0                             | 0                 | 0            | 40,900       | 2           | 3             |
| 2007 | AMERICAN FRIENDS OF THE INSTITUTE OF ECONOMIC AFFAIRS    | 541899539 | 1,868,417     | 1,868,417           | 0                       | 0                             | 0                 | 0            | 32,000       | 2           | 3             |
| 2008 | AMERICAN FRIENDS OF THE INSTITUTE OF ECONOMIC AFFAIRS    | 541899539 | 120,825       | 120,825             | 0                       | 0                             | 0                 | 0            | 72,000       | 2           | 3             |
| 2009 | AMERICAN FRIENDS OF THE INSTITUTE OF ECONOMIC AFFAIRS    | 541899539 | 669,932       | 669,932             | 0                       | 0                             | 0                 | 0            | 11,000       | 2           | 3             |
| 2010 | AMERICAN FRIENDS OF THE INSTITUTE OF ECONOMIC AFFAIRS    | 541899539 | 121,000       | 121,000             | 0                       | 0                             | 0                 | 0            | 10,000       | 2           | 3             |
| 2003 | AMERICAN GAS ASSOCIATION                                 | 130431590 | 21,532,112    | 0                   | 3,496,717               | 17,021,348                    | 731,133           | 282,914      | 0            | 2           | 6             |



| Year | Name                                  | EIN       | Total Revenue | Total Contributions | Program Service Revenue | Membership Dues & Assessments | Investment Income | Other Income | Grant Income | Focus Level | 501 C Subcode |
|------|---------------------------------------|-----------|---------------|---------------------|-------------------------|-------------------------------|-------------------|--------------|--------------|-------------|---------------|
| 2004 | AMERICAN GAS ASSOCIATION              | 130431590 | 23,397,515    | 0                   | 4,726,811               | 17,716,519                    | 861,551           | 92,634       | 0            | 2           | 6             |
| 2005 | AMERICAN GAS ASSOCIATION              | 130431590 | 23,759,561    | 0                   | 4,353,691               | 17,759,461                    | 1,484,579         | 161,830      | 0            | 2           | 6             |
| 2006 | AMERICAN GAS ASSOCIATION              | 130431590 | 24,326,176    | 0                   | 3,840,883               | 18,070,724                    | 2,118,787         | 295,782      | 0            | 2           | 6             |
| 2007 | AMERICAN GAS ASSOCIATION              | 130431590 | 25,896,079    | 0                   | 4,793,325               | 18,519,086                    | 2,392,892         | 190,776      | 0            | 2           | 6             |
| 2008 | AMERICAN GAS ASSOCIATION              | 130431590 | 25,149,225    | 0                   | 4,262,399               | 19,148,530                    | 782,507           | 955,789      | 0            | 2           | 6             |
| 2009 | AMERICAN GAS ASSOCIATION              | 130431590 | 22,150,625    | 0                   | 3,785,554               | 18,900,598                    | -1,531,585        | 205,766      | 0            | 2           | 6             |
| 2010 | AMERICAN GAS ASSOCIATION              | 130431590 | 24,827,823    | 0                   | 3,671,278               | 19,645,795                    | 1,287,823         | 0            | 0            | 2           | 6             |
| 2003 | AMERICAN LEGISLATIVE EXCHANGE COUNCIL | 520140979 | 5,640,684     | 4,663,222           | 919,240                 | 50,273                        | 7,949             | 0            | 555,000      | 2           | 3             |
| 2004 | AMERICAN LEGISLATIVE EXCHANGE COUNCIL | 520140979 | 5,703,895     | 4,678,159           | 965,210                 | 52,743                        | 7,783             | 0            | 412,000      | 2           | 3             |
| 2005 | AMERICAN LEGISLATIVE EXCHANGE COUNCIL | 520140979 | 6,278,800     | 5,215,031           | 948,248                 | 82,909                        | 32,612            | 0            | 254,000      | 2           | 3             |
| 2006 | AMERICAN LEGISLATIVE EXCHANGE COUNCIL | 520140979 | 7,228,171     | 5,775,598           | 1,319,180               | 75,275                        | 58,118            | 0            | 267,500      | 2           | 3             |
| 2007 | AMERICAN LEGISLATIVE EXCHANGE COUNCIL | 520140979 | 7,803,119     | 6,130,496           | 1,096,513               | 86,643                        | 56,702            | 432,765      | 198,500      | 2           | 3             |
| 2008 | AMERICAN LEGISLATIVE EXCHANGE COUNCIL | 520140979 | 6,975,222     | 5,626,129           | 1,216,381               | 93,387                        | 39,325            | 0            | 553,000      | 2           | 3             |
| 2009 | AMERICAN LEGISLATIVE EXCHANGE COUNCIL | 520140979 | 6,271,633     | 5,302,779           | 878,123                 | 82,981                        | 7,750             | 0            | 668,858      | 2           | 3             |
| 2010 | AMERICAN LEGISLATIVE EXCHANGE COUNCIL | 520140979 | 7,171,357     | 5,997,347           | 1,081,921               | 84,883                        | 6,889             | 317          | 794,500      | 2           | 3             |
| 2009 | AMERICAN NATURAL GAS ALLIANCE INC     | 264101108 | 67,362,500    | 0                   | 67,362,500              | 0                             | 0                 | 0            | 0            | 2           | 6             |
| 2010 | AMERICAN NATURAL GAS ALLIANCE INC     | 264101108 | 87,895,943    | 0                   | 87,790,000              | 0                             | 105,943           | 0            | 0            | 2           | 6             |
| 2003 | AMERICAN PETROLEUM INSTITUTE          | 130433430 | 72,799,959    | 0                   | 22,632,394              | 47,984,331                    | 2,475,538         | -292,304     | 0            | 2           | 6             |
| 2004 | AMERICAN PETROLEUM INSTITUTE          | 130433430 | 73,752,546    | 0                   | 22,547,114              | 50,891,370                    | 1,482,365         | -1,168,303   | 0            | 2           | 6             |
| 2005 | AMERICAN PETROLEUM INSTITUTE          | 130433430 | 112,603,821   | 0                   | 28,274,345              | 83,292,246                    | 1,371,274         | -334,044     | 0            | 2           | 6             |

| Year | Name                                  | EIN       | Total Revenue | Total Contributions | Program Service Revenue | Membership Dues & Assessments | Investment Income | Other Income | Grant Income | Focus Level | 501 C Subcode |
|------|---------------------------------------|-----------|---------------|---------------------|-------------------------|-------------------------------|-------------------|--------------|--------------|-------------|---------------|
| 2006 | AMERICAN PETROLEUM INSTITUTE          | 130433430 | 146,133,733   | 0                   | 29,883,066              | 113,161,427                   | 3,220,056         | -130,816     | 0            | 2           | 6             |
| 2007 | AMERICAN PETROLEUM INSTITUTE          | 130433430 | 197,904,042   | 0                   | 34,857,738              | 159,413,347                   | 3,534,460         | 98,497       | 0            | 2           | 6             |
| 2008 | AMERICAN PETROLEUM INSTITUTE          | 130433430 | 203,962,568   | 0                   | 40,292,560              | 159,493,855                   | 3,851,675         | 324,478      | 0            | 2           | 6             |
| 2009 | AMERICAN PETROLEUM INSTITUTE          | 130433430 | 198,796,139   | 0                   | 34,185,933              | 153,594,124                   | 2,658,646         | 161,117      | 0            | 2           | 6             |
| 2010 | AMERICAN PETROLEUM INSTITUTE          | 130433430 | 181,236,577   | 0                   | 37,843,889              | 132,919,140                   | 1,263,139         | 83,947       | 0            | 2           | 6             |
| 2004 | AMERICAN POLICY CENTER                | 521645354 | 1,386,111     | 1,367,657           |                         | 0                             | 0                 | 17,985       | 0            | 2           | 4             |
| 2005 | AMERICAN POLICY CENTER                | 521645354 | 941,435       | 934,451             |                         | 0                             | 0                 | 5,982        | 0            | 2           | 4             |
| 2006 | AMERICAN POLICY CENTER                | 521645354 | 859,264       | 844,254             |                         | 0                             | 0                 | 15,010       | 0            | 2           | 4             |
| 2007 | AMERICAN POLICY CENTER                | 521645354 | 1,086,987     | 1,045,874           |                         | 0                             | 0                 | 41,113       | 0            | 2           | 4             |
| 2008 | AMERICAN POLICY CENTER                | 521645354 | 1,195,616     | 1,195,616           |                         | 0                             | 0                 | 0            | 0            | 2           | 4             |
| 2009 | AMERICAN POLICY CENTER                | 521645354 | 949,652       | 889,703             | 59,949                  | 0                             | 0                 | 0            | 0            | 2           | 4             |
| 2010 | AMERICAN POLICY CENTER                | 521645354 | 905,504       | 867,401             | 38,103                  | 0                             | 0                 | 0            | 0            | 2           | 4             |
| 2010 | AMERICAN TRADITION INSTITUTE          | 264239065 | 186,000       | 186,000             |                         |                               | 0                 | 0            | 0            | 2           | 3             |
| 2003 | AMERICANS FOR BALANCED ENERGY CHOICES | 541978408 | 7,946,395     | 7,918,500           | 0                       | 0                             | 27,895            | 0            | 0            | 1           | 6             |
| 2004 | AMERICANS FOR BALANCED ENERGY CHOICES | 541978408 | 7,521,744     | 7,498,750           | 0                       | 0                             | 22,994            | 0            | 0            | 1           | 6             |
| 2005 | AMERICANS FOR BALANCED ENERGY CHOICES | 541978408 | 8,155,930     | 8,099,750           | 0                       | 0                             | 56,180            | 0            | 0            | 1           | 6             |
| 2006 | AMERICANS FOR BALANCED ENERGY CHOICES | 541978408 | 8,292,101     | 8,096,550           | 0                       | 0                             | 183,543           | 12,008       | 0            | 1           | 6             |
| 2007 | AMERICANS FOR BALANCED ENERGY CHOICES | 541978408 | 16,268,394    | 16,048,380          | 0                       | 0                             | 219,865           | 149          | 0            | 1           | 6             |
| 2004 | AMERICANS FOR PROSPERITY              | 753148958 | 869,730       | 869,730             | 0                       | 0                             | 0                 | 0            | 207,500      | 2           | 4             |
| 2005 | AMERICANS FOR PROSPERITY              | 753148958 | 650,777       | 650,777             | 0                       | 0                             | 0                 | 0            | 1,586,250    | 2           | 4             |

| Year | Name                                                 | EIN       | Total Revenue | Total Contributions | Program Service Revenue | Membership Dues & Assessments | Investment Income | Other Income | Grant Income | Focus Level | 501 C Subcode |
|------|------------------------------------------------------|-----------|---------------|---------------------|-------------------------|-------------------------------|-------------------|--------------|--------------|-------------|---------------|
| 2006 | AMERICANS FOR PROSPERITY                             | 753148958 | 3,429,610     | 3,420,446           | 0                       | 0                             | 9,164             | 0            | 1,815,300    | 2           | 4             |
| 2007 | AMERICANS FOR PROSPERITY                             | 753148958 | 3,461,193     | 3,442,441           | 0                       | 0                             | 13,979            | 4,773        | 1,560,500    | 2           | 4             |
| 2008 | AMERICANS FOR PROSPERITY                             | 753148958 | 7,035,262     | 7,012,051           | 0                       | 0                             | 1,443             | 21,768       | 3,524,000    | 2           | 4             |
| 2009 | AMERICANS FOR PROSPERITY                             | 753148958 | 16,565,957    | 16,336,753          | 0                       | 0                             | 150,823           | 78,381       | 4,696,631    | 2           | 4             |
| 2010 | AMERICANS FOR PROSPERITY                             | 753148958 | 22,089,095    | 21,715,876          | 9,979                   | 0                             | 357,661           | 5,579        | 8,978,411    | 2           | 4             |
| 2003 | ANNAPOLIS CENTER FOR SCIENCE-BASED PUBLIC POLICY INC | 521759134 | 669,595       | 646,125             | 0                       | 7,250                         | 13                | 16,207       | 75,000       | 2           | 3             |
| 2004 | ANNAPOLIS CENTER FOR SCIENCE-BASED PUBLIC POLICY INC | 521759134 | 625,491       | 594,000             | 0                       | 6,125                         | 14                | 25,352       | 95,000       | 2           | 3             |
| 2005 | ANNAPOLIS CENTER FOR SCIENCE-BASED PUBLIC POLICY INC | 521759134 | 522,329       | 480,000             | 0                       | 14,065                        | 0                 | 28,264       | 125,000      | 2           | 3             |
| 2006 | ANNAPOLIS CENTER FOR SCIENCE-BASED PUBLIC POLICY INC | 521759134 | 524,655       | 491,700             | 0                       | 2,378                         | 7                 | 30,570       | 103,000      | 2           | 3             |
| 2007 | ANNAPOLIS CENTER FOR SCIENCE-BASED PUBLIC POLICY INC | 521759134 | 381,294       | 367,500             | 0                       | 0                             | 762               | 13,032       | 20,000       | 2           | 3             |
| 2003 | ASSOCIATION OF GLOBAL AUTOMOBILE MANUFACTURERS INC   | 237104188 | 3,371,480     | 0                   | 354,897                 | 2,927,016                     | 67,285            | 22,282       |              | 2           | 6             |
| 2004 | ASSOCIATION OF GLOBAL AUTOMOBILE MANUFACTURERS INC   | 237104188 | 3,361,190     | 0                   | 223,132                 | 3,042,500                     | 66,233            | 29,325       |              | 2           | 6             |
| 2005 | ASSOCIATION OF GLOBAL AUTOMOBILE MANUFACTURERS INC   | 237104188 | 3,923,597     | 0                   | 86,800                  | 3,730,491                     | 106,302           | 4            |              | 2           | 6             |
| 2006 | ASSOCIATION OF GLOBAL AUTOMOBILE MANUFACTURERS INC   | 237104188 | 4,855,671     | 0                   | 81,600                  | 4,629,700                     | 143,710           | 661          |              | 2           | 6             |
| 2007 | ASSOCIATION OF GLOBAL AUTOMOBILE MANUFACTURERS INC   | 237104188 | 6,767,499     | 0                   | 65,282                  | 6,551,348                     | 145,526           | 5,343        |              | 2           | 6             |
| 2008 | ASSOCIATION OF GLOBAL AUTOMOBILE MANUFACTURERS INC   | 237104188 | 6,901,889     | 0                   | 28,000                  | 6,744,598                     | 132,635           | -3,344       |              | 2           | 6             |
| 2009 | ASSOCIATION OF GLOBAL AUTOMOBILE MANUFACTURERS INC   | 237104188 | 6,630,884     | 0                   | 18,000                  | 6,538,000                     | 73,067            | 1,817        |              | 2           | 6             |
| 2010 | ASSOCIATION OF GLOBAL AUTOMOBILE MANUFACTURERS INC   | 237104188 | 5,888,750     | 0                   | 28,000                  | 5,865,502                     | -11,872           | 0            |              | 2           | 6             |
| 2003 | ATLAS ECONOMIC RESEARCH FOUNDATION ATLAS             | 942763845 | 4,003,381     | 3,978,292           | 10,593                  | 0                             | 14,496            | 0            | 4,330,427    | 2           | 3             |
| 2004 | ATLAS ECONOMIC RESEARCH FOUNDATION ATLAS             | 942763845 | 2,898,335     | 2,834,681           | 42,577                  | 0                             | 21,077            | 0            | 3,883,385    | 2           | 3             |

| Year | Name                                     | EIN       | Total Revenue | Total Contributions | Program Service Revenue | Membership Dues & Assessments | Investment Income | Other Income | Grant Income | Focus Level | 501 C Subcode |
|------|------------------------------------------|-----------|---------------|---------------------|-------------------------|-------------------------------|-------------------|--------------|--------------|-------------|---------------|
| 2005 | ATLAS ECONOMIC RESEARCH FOUNDATION ATLAS | 942763845 | 4,184,994     | 4,108,746           | 47,847                  | 0                             | 28,401            | 0            | 2,318,655    | 2           | 3             |
| 2006 | ATLAS ECONOMIC RESEARCH FOUNDATION ATLAS | 942763845 | 4,632,964     | 4,526,875           | 39,285                  | 0                             | 66,804            | 0            | 3,473,664    | 2           | 3             |
| 2007 | ATLAS ECONOMIC RESEARCH FOUNDATION ATLAS | 942763845 | 6,953,155     | 6,800,576           | 64,258                  | 0                             | 88,321            | 0            | 2,626,877    | 2           | 3             |
| 2008 | ATLAS ECONOMIC RESEARCH FOUNDATION ATLAS | 942763845 | 6,676,483     | 6,497,129           |                         | 0                             | 0                 | 0            | 2,141,700    | 2           | 3             |
| 2009 | ATLAS ECONOMIC RESEARCH FOUNDATION ATLAS | 942763845 | 5,649,679     | 5,435,172           | 203,808                 | 0                             | 24,190            | -13,491      | 2,404,821    | 2           | 3             |
| 2010 | ATLAS ECONOMIC RESEARCH FOUNDATION ATLAS | 942763845 | 6,102,160     | 5,781,427           | 252,530                 | 0                             | 67,703            | 500          | 3,437,014    | 2           | 3             |
| 2003 | CAPITAL RESEARCH CENTER                  | 521289734 | 1,775,722     | 1,616,708           | 5,464                   | 0                             | 146,242           | 7,308        | 588,000      | 2           | 3             |
| 2004 | CAPITAL RESEARCH CENTER                  | 521289734 | 2,024,565     | 1,703,823           | 6,053                   | 0                             | 292,401           | 22,288       | 636,600      | 2           | 3             |
| 2005 | CAPITAL RESEARCH CENTER                  | 521289734 | 2,254,274     | 1,819,199           | 2,546                   | 0                             | 400,129           | 32,400       | 661,500      | 2           | 3             |
| 2006 | CAPITAL RESEARCH CENTER                  | 521289734 | 2,375,340     | 1,742,259           | 6,579                   | 0                             | 592,997           | 33,505       | 587,000      | 2           | 3             |
| 2007 | CAPITAL RESEARCH CENTER                  | 521289734 | 2,574,395     | 1,673,768           | 8,974                   | 0                             | 870,963           | 20,690       | 682,500      | 2           | 3             |
| 2008 | CAPITAL RESEARCH CENTER                  | 521289734 | 1,353,282     | 1,235,295           | 9,932                   | 0                             | 108,055           | 0            | 432,500      | 2           | 3             |
| 2009 | CAPITAL RESEARCH CENTER                  | 521289734 | 1,336,624     | 1,371,978           | 3,833                   | 0                             | -44,041           | 4,854        | 425,500      | 2           | 3             |
| 2010 | CAPITAL RESEARCH CENTER                  | 521289734 | 1,693,170     | 1,382,988           | 4,419                   | 0                             | 305,444           | 319          | 415,600      | 2           | 3             |
| 2003 | CASCADE POLICY INSTITUTE                 | 931045925 | 507,931       | 498,651             | 7,970                   | 0                             | 1,310             | 0            | 100,000      | 2           | 3             |
| 2004 | CASCADE POLICY INSTITUTE                 | 931045925 | 546,535       | 535,434             | 9,667                   | 0                             | 1,434             | 0            | 124,500      | 2           | 3             |
| 2005 | CASCADE POLICY INSTITUTE                 | 931045925 | 432,006       | 422,656             | 5,600                   | 0                             | 3,750             | 0            | 244,500      | 2           | 3             |
| 2006 | CASCADE POLICY INSTITUTE                 | 931045925 | 557,216       | 539,403             | 0                       | 0                             | 4,645             | 13,168       | 135,575      | 2           | 3             |
| 2007 | CASCADE POLICY INSTITUTE                 | 931045925 | 638,693       | 631,123             | 0                       | 0                             | 4,730             | 2,840        | 187,293      | 2           | 3             |
| 2008 | CASCADE POLICY INSTITUTE                 | 931045925 | 997,550       | 973,206             | 0                       | 0                             | 8,000             | 16,344       | 694,600      | 2           | 3             |

| Year | Name                                                     | EIN       | Total Revenue | Total Contributions | Program Service Revenue | Membership Dues & Assessments | Investment Income | Other Income | Grant Income | Focus Level | 501 C Subcode |
|------|----------------------------------------------------------|-----------|---------------|---------------------|-------------------------|-------------------------------|-------------------|--------------|--------------|-------------|---------------|
| 2009 | CASCADE POLICY INSTITUTE                                 | 931045925 | 912,019       | 886,006             | 0                       | 0                             | 9,513             | 16,500       | 492,000      | 2           | 3             |
| 2010 | CASCADE POLICY INSTITUTE                                 | 931045925 | 988,404       | 978,566             | 0                       | 0                             | 2,976             | 6,862        | 455,000      | 2           | 3             |
| 2003 | CATO INSTITUTE                                           | 237432162 | 12,975,701    | 12,063,401          | 432,894                 | 0                             | 95,558            | 383,848      | 2,581,500    | 2           | 3             |
| 2004 | CATO INSTITUTE                                           | 237432162 | 14,530,419    | 13,537,255          | 597,441                 | 0                             | 80,827            | 314,896      | 3,043,388    | 2           | 3             |
| 2005 | CATO INSTITUTE                                           | 237432162 | 22,656,851    | 6,104,825           | 220,250                 | 0                             | 114,399           | -74,557      | 3,984,050    | 2           | 3             |
| 2006 | CATO INSTITUTE                                           | 237432162 | 20,354,008    | 18,878,487          | 538,223                 | 0                             | 785,052           | 152,246      | 3,954,050    | 2           | 3             |
| 2007 | CATO INSTITUTE                                           | 237432162 | 23,740,702    | 22,189,765          | 540,109                 | 0                             | 856,422           | 154,406      | 4,337,020    | 2           | 3             |
| 2008 | CATO INSTITUTE                                           | 237432162 | 20,145,060    | 19,129,916          | 537,840                 | 0                             | 316,804           | 160,500      | 4,386,501    | 2           | 3             |
| 2009 | CATO INSTITUTE                                           | 237432162 | 31,529,336    | 29,717,643          | 559,070                 | 0                             | 400,804           | 825,780      | 3,753,350    | 2           | 3             |
| 2010 | CATO INSTITUTE                                           | 237432162 | 40,410,727    | 39,253,053          | 643,225                 | 0                             | 96,831            | 393,427      | 4,646,698    | 2           | 3             |
| 2003 | CENTER FOR DEFENSE OF FREE ENTERPRISE                    | 910973976 | 90,085        | 85,273              | 4,332                   | 0                             | 480               | 0            | 45,000       | 2           | 3             |
| 2004 | CENTER FOR DEFENSE OF FREE ENTERPRISE                    | 910973976 | 155,884       | 141,664             | 13,869                  | 0                             | 351               | 0            | 130,000      | 2           | 3             |
| 2005 | CENTER FOR DEFENSE OF FREE ENTERPRISE                    | 910973976 | 94,894        | 84,819              | 9,824                   | 0                             | 251               | 0            | 60,000       | 2           | 3             |
| 2006 | CENTER FOR DEFENSE OF FREE ENTERPRISE                    | 910973976 | 83,034        | 79,311              | 3,056                   | 0                             | 667               | 0            | 0            | 2           | 3             |
| 2007 | CENTER FOR DEFENSE OF FREE ENTERPRISE                    | 910973976 | 13,847        | 10,750              | 2,499                   | 0                             | 597               | 0            | 0            | 2           | 3             |
| 2008 | CENTER FOR DEFENSE OF FREE ENTERPRISE                    | 910973976 | 21,746        | 20,458              | 1,176                   | 0                             | 111               | 0            | 0            | 2           | 3             |
| 2009 | CENTER FOR DEFENSE OF FREE ENTERPRISE                    | 910973976 | 64,839        | 64,350              | 0                       | 0                             | 489               | 0            | 0            | 2           | 3             |
| 2010 | CENTER FOR DEFENSE OF FREE ENTERPRISE                    | 910973976 | 29,150        | 28,297              | 0                       | 0                             | 852               | 0            | 0            | 2           | 3             |
| 2003 | CENTER FOR THE STUDY OF CARBON DIOXIDE AND GLOBAL CHANGE | 860902777 | 245,015       | 244,537             | 0                       | 0                             | 478               | 0            | 90,000       | 1           | 3             |
| 2004 | CENTER FOR THE STUDY OF CARBON DIOXIDE AND GLOBAL CHANGE | 860902777 | 146,554       | 146,322             | 0                       | 0                             | 232               | 0            | 0            | 1           | 3             |

| Year | Name                                                     | EIN       | Total Revenue | Total Contributions | Program Service Revenue | Membership Dues & Assessments | Investment Income | Other Income | Grant Income | Focus Level | 501 C Subcode |
|------|----------------------------------------------------------|-----------|---------------|---------------------|-------------------------|-------------------------------|-------------------|--------------|--------------|-------------|---------------|
| 2005 | CENTER FOR THE STUDY OF CARBON DIOXIDE AND GLOBAL CHANGE | 860902777 | 316,892       | 316,810             | 0                       | 0                             | 82                | 0            | 60,000       | 1           | 3             |
| 2006 | CENTER FOR THE STUDY OF CARBON DIOXIDE AND GLOBAL CHANGE | 860902777 | 300,563       | 300,554             | 0                       | 0                             | 0                 | 9            | 0            | 1           | 3             |
| 2007 | CENTER FOR THE STUDY OF CARBON DIOXIDE AND GLOBAL CHANGE | 860902777 | 674,725       | 674,725             | 0                       | 0                             | 0                 | 0            | 150,000      | 1           | 3             |
| 2008 | CENTER FOR THE STUDY OF CARBON DIOXIDE AND GLOBAL CHANGE | 860902777 | 1,065,971     | 1,065,971           | 0                       | 0                             | 0                 | 0            | 129,400      | 1           | 3             |
| 2009 | CENTER FOR THE STUDY OF CARBON DIOXIDE AND GLOBAL CHANGE | 860902777 | 1,552,628     | 1,548,145           | 4,393                   | 0                             | 90                | 0            | 79,400       | 1           | 3             |
| 2010 | CENTER FOR THE STUDY OF CARBON DIOXIDE AND GLOBAL CHANGE | 860902777 | 1,001,003     | 877,417             | 119,072                 | 0                             | 2,685             | 1,829        | 0            | 1           | 3             |
| 2003 | CHAMBER OF COMMERCE OF THE UNITED STATES OF AMERICA      | 530045720 | 76,227,227    | 55,589,499          | 1,210,686               | 16,742,023                    | 971               | 2,684,048    | 0            | 2           | 6             |
| 2004 | CHAMBER OF COMMERCE OF THE UNITED STATES OF AMERICA      | 530045720 | 90,854,804    | 70,970,902          | 1,046,667               | 15,616,402                    | 4,793             | 3,216,040    | 0            | 2           | 6             |
| 2005 | CHAMBER OF COMMERCE OF THE UNITED STATES OF AMERICA      | 530045720 | 134,643,353   | 128,747,363         | 1,399,327               |                               | 174,784           | 4,321,879    | 0            | 2           | 6             |
| 2006 | CHAMBER OF COMMERCE OF THE UNITED STATES OF AMERICA      | 530045720 | 124,079,111   | 116,864,553         | 1,587,145               | 0                             | 466,029           | 5,161,384    | 0            | 2           | 6             |
| 2007 | CHAMBER OF COMMERCE OF THE UNITED STATES OF AMERICA      | 530045720 | 120,481,662   | 112,598,712         | 1,350,399               | 0                             | 603,177           | 5,929,374    | 0            | 2           | 6             |
| 2008 | CHAMBER OF COMMERCE OF THE UNITED STATES OF AMERICA      | 530045720 | 147,113,025   | 139,924,246         | 1,482,324               | 0                             | 674,682           | 5,031,773    | 50,000       | 2           | 6             |
| 2009 | CHAMBER OF COMMERCE OF THE UNITED STATES OF AMERICA      | 530045720 | 214,617,809   | 205,434,412         | 2,602,476               | 0                             | 91,594            | 6,489,327    | 136,500      | 2           | 6             |
| 2010 | CHAMBER OF COMMERCE OF THE UNITED STATES OF AMERICA      | 530045720 | 198,586,150   | 188,796,550         | 2,437,323               | 0                             | 102,144           | 7,250,133    | 0            | 2           | 6             |
| 2009 | CITIZENS FOR AFFORDABLE ENERGY INC                       | 263060991 | 287,637       | 287,583             | 0                       | 0                             | 54                | 0            | 0            | 2           | 3             |
| 2010 | CITIZENS FOR AFFORDABLE ENERGY INC                       | 263060991 | 315,204       | 315,204             | 0                       | 0                             | 0                 | 0            | 0            | 2           | 3             |
| 2009 | CO2 IS GREEN INC                                         | 270586701 | 752,800       | 752,800             |                         | 0                             | 0                 | 0            | 0            | 1           | 4             |
| 2010 | CO2 IS GREEN INC                                         | 270586701 | 355,000       | 355,000             | 0                       | 0                             | 0                 | 0            | 0            | 1           | 4             |
| 2010 | COALITION FOR AMERICAN JOBS                              | 275075681 | 2,600,000     | 2,600,000           |                         | 0                             | 0                 | 0            | 0            | 2           | 6             |
| 2003 | COALITION FOR VEHICLE CHOICE INC                         | 521729512 | 66,518        | 0                   | 0                       | 66,105                        | 16                | 397          | 0            | 1           | 6             |

| Year | Name                                                 | EIN       | Total Revenue | Total Contributions | Program Service Revenue | Membership Dues & Assessments | Investment Income | Other Income | Grant Income | Focus Level | 501 C Subcode |
|------|------------------------------------------------------|-----------|---------------|---------------------|-------------------------|-------------------------------|-------------------|--------------|--------------|-------------|---------------|
| 2004 | COLLEGIANS FOR A CONSTRUCTIVE TOMORROW-UPPER MIDWEST | 710897550 | 143,150       | 143,150             | 0                       | 0                             | 0                 | 0            | 0            | 1           | 3             |
| 2005 | COLLEGIANS FOR A CONSTRUCTIVE TOMORROW-UPPER MIDWEST | 710897550 | 155,605       | 155,605             | 0                       | 0                             | 0                 | 0            | 0            | 1           | 3             |
| 2006 | COLLEGIANS FOR A CONSTRUCTIVE TOMORROW-UPPER MIDWEST | 710897550 | 213,362       | 213,362             | 0                       | 0                             | 0                 | 0            | 0            | 1           | 3             |
| 2007 | COLLEGIANS FOR A CONSTRUCTIVE TOMORROW-UPPER MIDWEST | 710897550 | 246,087       | 246,087             |                         | 0                             | 0                 | 0            | 0            | 1           | 3             |
| 2008 | COLLEGIANS FOR A CONSTRUCTIVE TOMORROW-UPPER MIDWEST | 710897550 | 309,529       | 302,486             | 0                       | 0                             | 0                 | 7,043        | 0            | 1           | 3             |
| 2009 | COLLEGIANS FOR A CONSTRUCTIVE TOMORROW-UPPER MIDWEST | 710897550 | 151,584       | 151,584             |                         | 0                             | 0                 | 0            | 0            | 1           | 3             |
| 2010 | COLLEGIANS FOR A CONSTRUCTIVE TOMORROW-UPPER MIDWEST | 710897550 | 124,923       | 123,023             | 0                       | 0                             | 0                 | 1,900        | 0            | 1           | 3             |
| 2003 | COMMITTEE FOR A CONSTRUCTIVE TOMORROW                | 521462893 | 379,438       | 379,273             | 0                       | 0                             | 165               | 0            | 102,000      | 1           | 3             |
| 2004 | COMMITTEE FOR A CONSTRUCTIVE TOMORROW                | 521462893 | 328,095       | 325,709             | 0                       | 0                             | 49                | 2,337        | 290,000      | 1           | 3             |
| 2005 | COMMITTEE FOR A CONSTRUCTIVE TOMORROW                | 521462893 | 571,869       | 571,869             | 0                       | 0                             | 0                 | 0            | 255,000      | 1           | 3             |
| 2006 | COMMITTEE FOR A CONSTRUCTIVE TOMORROW                | 521462893 | 667,196       | 664,080             | 0                       | 0                             | 16                | 3,100        | 270,000      | 1           | 3             |
| 2007 | COMMITTEE FOR A CONSTRUCTIVE TOMORROW                | 521462893 | 943,646       | 943,618             | 0                       | 0                             | 28                | 0            | 260,000      | 1           | 3             |
| 2008 | COMMITTEE FOR A CONSTRUCTIVE TOMORROW                | 521462893 | 1,498,291     | 1,497,962           | 0                       | 0                             | 92                | 237          | 908,500      | 1           | 3             |
| 2009 | COMMITTEE FOR A CONSTRUCTIVE TOMORROW                | 521462893 | 3,071,277     | 3,071,053           | 0                       | 0                             | 224               | 0            | 1,103,194    | 1           | 3             |
| 2010 | COMMITTEE FOR A CONSTRUCTIVE TOMORROW                | 521462893 | 2,850,747     | 2,825,477           | 0                       | 0                             | 151               | 25,119       | 1,482,754    | 1           | 3             |
| 2003 | COMPETITIVE ENTERPRISE INSTITUTE                     | 521351785 | 3,074,844     | 3,056,783           | 2,195                   | 0                             | 17,096            | -1,230       | 1,532,320    | 2           | 3             |
| 2004 | COMPETITIVE ENTERPRISE INSTITUTE                     | 521351785 | 2,919,537     | 2,883,761           | 1,488                   | 0                             | 19,917            | 14,371       | 1,403,590    | 2           | 3             |
| 2005 | COMPETITIVE ENTERPRISE INSTITUTE                     | 521351785 | 3,237,135     | 3,206,756           | 1,346                   | 0                             | 32,544            | -3,511       | 1,533,740    | 2           | 3             |
| 2006 | COMPETITIVE ENTERPRISE INSTITUTE                     | 521351785 | 3,742,819     | 3,683,866           | 101                     | 0                             | 52,569            | 6,283        | 1,626,250    | 2           | 3             |
| 2007 | COMPETITIVE ENTERPRISE INSTITUTE                     | 521351785 | 3,650,461     | 3,545,199           | 23,754                  | 0                             | 65,942            | 15,566       | 1,630,694    | 2           | 3             |

| Year | Name                             | EIN       | Total Revenue | Total Contributions | Program Service Revenue | Membership Dues & Assessments | Investment Income | Other Income | Grant Income | Focus Level | 501 C Subcode |
|------|----------------------------------|-----------|---------------|---------------------|-------------------------|-------------------------------|-------------------|--------------|--------------|-------------|---------------|
| 2008 | COMPETITIVE ENTERPRISE INSTITUTE | 521351785 | 5,257,682     | 5,229,933           | 0                       | 0                             | 18,368            | 9,381        | 1,479,508    | 2           | 3             |
| 2009 | COMPETITIVE ENTERPRISE INSTITUTE | 521351785 | 4,660,901     | 4,584,419           | 0                       | 0                             | 27,177            | 49,305       | 2,003,906    | 2           | 3             |
| 2010 | COMPETITIVE ENTERPRISE INSTITUTE | 521351785 | 4,247,228     | 4,179,906           | 0                       | 0                             | 10,830            | 56,492       | 1,334,450    | 2           | 3             |
| 2003 | CONGRESS OF RACIAL EQUALITY      | 133608663 | 1,482,346     | 1,673,241           |                         | 47,259                        | 0                 | 0            | 0            | 2           | 3             |
| 2004 | CONGRESS OF RACIAL EQUALITY      | 133608663 | 1,335,095     | 1,037,325           |                         | 55,022                        | 0                 | 0            | 135,000      | 2           | 3             |
| 2005 | CONGRESS OF RACIAL EQUALITY      | 133608663 | 961,489       | 1,015,142           |                         | 69,120                        | 0                 | 0            | 75,000       | 2           | 3             |
| 2006 | CONGRESS OF RACIAL EQUALITY      | 133608663 | 486,110       | 537,505             |                         | 0                             | 0                 | 0            | 25,000       | 2           | 3             |
| 2007 | CONGRESS OF RACIAL EQUALITY      | 133608663 | 454,659       | 381,358             |                         | 0                             | 0                 | 0            | 0            | 2           | 3             |
| 2008 | CONGRESS OF RACIAL EQUALITY      | 133608663 | 486,110       | 537,505             |                         | 17,700                        | 0                 | -69,095      | 0            | 2           | 3             |
| 2009 | CONGRESS OF RACIAL EQUALITY      | 133608663 | 381,358       | 381,358             |                         |                               | 0                 | 0            | 0            | 2           | 3             |
| 2010 | CONGRESS OF RACIAL EQUALITY      | 133608663 | 205,121       | 206,561             |                         |                               | 0                 | 0            | -1,440       | 2           | 3             |
| 2003 | CONSUMER ALERT INC               | 60961299  | 217,089       | 203,110             | 2,108                   | 11,534                        | 337               | 0            | 54,000       | 2           | 3             |
| 2004 | CONSUMER ALERT INC               | 60961299  | 180,405       | 171,575             | 1,421                   | 6,120                         | 111               | 1,178        | 92,000       | 2           | 3             |
| 2008 | CONSUMER ENERGY ALLIANCE INC     | 261658339 | 203,397       | 203,389             | 0                       | 0                             | 8                 | 0            | 30,000       | 2           | 4             |
| 2009 | CONSUMER ENERGY ALLIANCE INC     | 261658339 | 463,082       | 463,000             | 0                       | 0                             | 82                | 0            | 67,500       | 2           | 4             |
| 2010 | CONSUMER ENERGY ALLIANCE INC     | 261658339 | 737,492       | 737,333             | 0                       | 0                             | 159               | 0            | 35,000       | 2           | 4             |
| 2003 | EDISON ELECTRIC INSTITUTE        | 130659550 | 61,828,814    | 0                   | 7,815,329               | 51,228,731                    | 2,784,754         | 0            | 0            | 2           | 6             |
| 2004 | EDISON ELECTRIC INSTITUTE        | 130659550 | 67,861,028    | 0                   | 11,115,178              | 54,484,850                    | 2,261,000         | 0            | 0            | 2           | 6             |
| 2005 | EDISON ELECTRIC INSTITUTE        | 130659550 | 69,954,241    | 0                   | 9,656,847               | 57,166,931                    | 3,130,463         | 0            | 0            | 2           | 6             |
| 2006 | EDISON ELECTRIC INSTITUTE        | 130659550 | 70,121,557    | 0                   | 9,729,265               | 57,026,861                    | 3,365,431         | 0            | 0            | 2           | 6             |



| Year | Name                                                                 | EIN       | Total Revenue | Total Contributions | Program Service Revenue | Membership Dues & Assessments | Investment Income | Other Income | Grant Income | Focus Level | 501 C Subcode |
|------|----------------------------------------------------------------------|-----------|---------------|---------------------|-------------------------|-------------------------------|-------------------|--------------|--------------|-------------|---------------|
| 2007 | EDISON ELECTRIC INSTITUTE                                            | 130659550 | 74,428,682    | 0                   | 10,307,602              | 59,823,340                    | 4,297,740         | 0            | 0            | 2           | 6             |
| 2008 | EDISON ELECTRIC INSTITUTE                                            | 130659550 | 80,325,736    | 0                   | 11,453,443              | 64,191,680                    | 4,680,613         | 0            | 0            | 2           | 6             |
| 2009 | EDISON ELECTRIC INSTITUTE                                            | 130659550 | 75,307,738    | 0                   | 9,886,909               | 61,487,893                    | 3,932,936         | 0            | 0            | 2           | 6             |
| 2010 | EDISON ELECTRIC INSTITUTE                                            | 130659550 | 81,898,098    | 0                   | 11,615,106              | 66,579,779                    | 3,703,213         | 0            | 0            | 2           | 6             |
| 2010 | ENERGY MAKES AMERICA GREAT                                           | 273324688 | 15,600        | 15,600              |                         | 0                             | 0                 | 0            | 0            | 1           | 4             |
| 2003 | ENVIRONMENTAL LITERACY COUNCIL                                       | 521995766 | 556,981       | 552,323             | 4,594                   | 0                             | 64                | 0            | 237,516      | 2           | 3             |
| 2004 | ENVIRONMENTAL LITERACY COUNCIL                                       | 521995766 | 779,155       | 369,259             |                         | 0                             | 15                | 0            | 165,000      | 2           | 3             |
| 2005 | ENVIRONMENTAL LITERACY COUNCIL                                       | 521995766 | 435,383       | 434,967             | 0                       | 0                             | 80                | 336          | 225,000      | 2           | 3             |
| 2006 | ENVIRONMENTAL LITERACY COUNCIL                                       | 521995766 | 473,262       | 470,239             | 0                       | 0                             | 0                 | 3,023        | 127,500      | 2           | 3             |
| 2007 | ENVIRONMENTAL LITERACY COUNCIL                                       | 521995766 | 301,013       | 270,174             | 0                       | 0                             | 0                 | 30,839       | 152,500      | 2           | 3             |
| 2008 | ENVIRONMENTAL LITERACY COUNCIL                                       | 521995766 | 196,274       | 162,061             | 0                       | 0                             | 0                 | 34,213       | 115,000      | 2           | 3             |
| 2010 | FEDERATION FOR AMERICAN COAL, ENERGY AND SECURITY                    | 273390160 | 3,405,722     | 3,405,722           |                         | 0                             | 0                 | 0            | 0            | 2           | 4             |
| 2004 | FREE ENTERPRISE ACTION INSTITUTE/FREE ENTERPRISE EDUCATION INSTITUTE | 810634209 | 102,874       | 102,500             | 0                       | 0                             | 374               | 0            | 50,000       | 2           | 3             |
| 2005 | FREE ENTERPRISE ACTION INSTITUTE/FREE ENTERPRISE EDUCATION INSTITUTE | 810634209 | 71,464        | 71,000              | 0                       | 0                             | 464               | 0            | 20,000       | 2           | 3             |
| 2006 | FREE ENTERPRISE ACTION INSTITUTE/FREE ENTERPRISE EDUCATION INSTITUTE | 810634209 | 479,964       | 476,500             | 0                       | 0                             | 3,464             | 0            | 195,340      | 2           | 3             |
| 2007 | FREE ENTERPRISE ACTION INSTITUTE/FREE ENTERPRISE EDUCATION INSTITUTE | 810634209 | 601,223       | 597,605             | 0                       | 0                             | 3,618             | 0            | 380,847      | 2           | 3             |
| 2008 | FREE ENTERPRISE ACTION INSTITUTE/FREE ENTERPRISE EDUCATION INSTITUTE | 810634209 | 214,056       | 213,800             | 0                       | 0                             | 256               | 0            | 161,500      | 2           | 3             |
| 2010 | FREEDOM ACTION                                                       | 270678072 | 336,178       | 336,082             |                         | 0                             | 0                 | 96           | 0            | 2           | 4             |
| 2003 | FREEDOMWORKS FOUNDATION/CSE FREEDOM WORKS FOUNDATION                 | 521526916 | 610,473       | 609,981             | 0                       | 0                             | 30                | 462          | 10,000       | 2           | 3             |
| 2004 | FREEDOMWORKS FOUNDATION/CSE FREEDOM WORKS FOUNDATION                 | 521526916 | 2,690,329     | 2,611,269           | 0                       | 0                             | 276               | 78,784       | 300,000      | 2           | 3             |

| Year | Name                                                 | EIN       | Total Revenue | Total Contributions | Program Service Revenue | Membership Dues & Assessments | Investment Income | Other Income | Grant Income | Focus Level | 501 C Subcode |
|------|------------------------------------------------------|-----------|---------------|---------------------|-------------------------|-------------------------------|-------------------|--------------|--------------|-------------|---------------|
| 2005 | FREEDOMWORKS FOUNDATION/CSE FREEDOM WORKS FOUNDATION | 521526916 | 3,836,175     | 3,684,002           | 0                       | 0                             | 1,887             | 150,286      | 495,000      | 2           | 3             |
| 2006 | FREEDOMWORKS FOUNDATION/CSE FREEDOM WORKS FOUNDATION | 521526916 | 4,424,447     | 4,157,870           | 0                       | 0                             | 72,772            | 193,805      | 207,000      | 2           | 3             |
| 2007 | FREEDOMWORKS FOUNDATION/CSE FREEDOM WORKS FOUNDATION | 521526916 | 4,201,451     | 4,010,100           | 0                       | 0                             | 94,623            | 96,728       | 1,661,000    | 2           | 3             |
| 2008 | FREEDOMWORKS FOUNDATION/CSE FREEDOM WORKS FOUNDATION | 521526916 | 3,148,660     | 2,936,908           | 0                       | 0                             | 85,623            | 126,129      | 476,000      | 2           | 3             |
| 2009 | FREEDOMWORKS FOUNDATION/CSE FREEDOM WORKS FOUNDATION | 521526916 | 4,159,904     | 3,931,825           | 0                       | 0                             | 37,746            | 190,333      | 651,000      | 2           | 3             |
| 2010 | FREEDOMWORKS FOUNDATION/CSE FREEDOM WORKS FOUNDATION | 521526916 | 4,503,330     | 4,485,499           | 0                       | 0                             | -4,031            | 21,862       | 1,537,000    | 2           | 3             |
| 2004 | FREEDOMWORKS INC./ CITIZENS FOR A SOUND ECONOMY      | 521349353 | 3,082,191     | 2,971,432           |                         | 0                             | 6,189             | 104,570      | 11,000       | 2           | 4             |
| 2005 | FREEDOMWORKS INC./ CITIZENS FOR A SOUND ECONOMY      | 521349353 | 4,925,691     | 4,556,366           |                         | 0                             | 1,117             | 368,208      | 50,000       | 2           | 4             |
| 2006 | FREEDOMWORKS INC./ CITIZENS FOR A SOUND ECONOMY      | 521349353 | 6,165,233     | 5,862,198           |                         | 0                             | 25,168            | 277,867      | 110,000      | 2           | 4             |
| 2007 | FREEDOMWORKS INC./ CITIZENS FOR A SOUND ECONOMY      | 521349353 | 2,235,030     | 2,030,092           |                         | 0                             | 36,870            | 165,068      | 10,000       | 2           | 4             |
| 2008 | FREEDOMWORKS INC./ CITIZENS FOR A SOUND ECONOMY      | 521349353 | 4,346,782     | 4,147,545           |                         | 0                             | 37,209            | 162,028      | 80,000       | 2           | 4             |
| 2009 | FREEDOMWORKS INC./ CITIZENS FOR A SOUND ECONOMY      | 521349353 | 3,695,035     | 3,579,269           |                         | 0                             | 20,888            | 94,878       | 177,000      | 2           | 4             |
| 2010 | FREEDOMWORKS INC./ CITIZENS FOR A SOUND ECONOMY      | 521349353 | 9,250,240     | 9,128,652           |                         | 0                             | 2,459             | 119,129      | 541,000      | 2           | 4             |
| 2003 | FRONTIERS OF FREEDOM INSTITUTE INC                   | 541773197 | 791,288       | 635,936             | 0                       | 0                             | 331               | 155,021      | 0            | 2           | 3             |
| 2004 | FRONTIERS OF FREEDOM INSTITUTE INC                   | 541773197 | 725,384       | 721,361             |                         | 0                             | 0                 | 0            | 0            | 2           | 3             |
| 2005 | FRONTIERS OF FREEDOM INSTITUTE INC                   | 541773197 | 930,032       | 827,348             | 0                       | 0                             | 1,788             | 100,896      | 0            | 2           | 3             |
| 2006 | FRONTIERS OF FREEDOM INSTITUTE INC                   | 541773197 | 945,966       | 923,880             | 0                       | 0                             | 528               | 21,558       | 50,000       | 2           | 3             |
| 2003 | GEORGE C MARSHALL INSTITUTE                          | 222569466 | 684,031       | 683,675             | 239                     | 0                             | 117               | 0            | 493,000      | 2           | 3             |
| 2004 | GEORGE C MARSHALL INSTITUTE                          | 222569466 | 740,615       | 732,362             | 620                     | 0                             | 7,633             | 0            | 500,000      | 2           | 3             |
| 2005 | GEORGE C MARSHALL INSTITUTE                          | 222569466 | 802,682       | 800,562             | 534                     | 1,586                         | 0                 | 0            | 831,570      | 2           | 3             |

| Year | Name                        | EIN       | Total Revenue | Total Contributions | Program Service Revenue | Membership Dues & Assessments | Investment Income | Other Income | Grant Income | Focus Level | 501 C Subcode |
|------|-----------------------------|-----------|---------------|---------------------|-------------------------|-------------------------------|-------------------|--------------|--------------|-------------|---------------|
| 2006 | GEORGE C MARSHALL INSTITUTE | 222569466 | 969,923       | 964,406             | 4,668                   | 0                             | 849               | 0            | 508,500      | 2           | 3             |
| 2007 | GEORGE C MARSHALL INSTITUTE | 222569466 | 741,135       | 737,456             | 3,679                   | 0                             | 0                 | 0            | 477,000      | 2           | 3             |
| 2008 | GEORGE C MARSHALL INSTITUTE | 222569466 | 839,521       | 833,510             | 6,007                   | 0                             | 4                 | 0            | 537,000      | 2           | 3             |
| 2009 | GEORGE C MARSHALL INSTITUTE | 222569466 | 469,845       | 506,853             | 585                     | 0                             | 0                 | -37,593      | 420,000      | 2           | 3             |
| 2010 | GEORGE C MARSHALL INSTITUTE | 222569466 | 539,438       | 535,838             | 0                       | 0                             | 0                 | 3,600        | 350,000      | 2           | 3             |
| 2003 | HEARTLAND INSTITUTE         | 363309812 | 1,800,602     | 1,546,170           | 223,787                 | 28,945                        | 1,700             | 0            | 615,189      | 2           | 3             |
| 2004 | HEARTLAND INSTITUTE         | 363309812 | 2,016,411     | 1,768,416           | 211,980                 | 33,196                        | 2,819             | 0            | 697,788      | 2           | 3             |
| 2005 | HEARTLAND INSTITUTE         | 363309812 | 4,520,884     | 4,242,949           | 229,650                 | 29,943                        | 1,401             | 16,941       | 876,927      | 2           | 3             |
| 2006 | HEARTLAND INSTITUTE         | 363309812 | 2,747,328     | 2,491,809           | 187,267                 | 25,279                        | 42,973            | 0            | 1,524,703    | 2           | 3             |
| 2007 | HEARTLAND INSTITUTE         | 363309812 | 5,216,884     | 4,967,005           | 189,135                 | 26,157                        | 34,587            | 0            | 3,174,937    | 2           | 3             |
| 2008 | HEARTLAND INSTITUTE         | 363309812 | 7,782,959     | 7,613,766           | 185,671                 | 0                             | 22,661            | -39,139      | 4,798,250    | 2           | 3             |
| 2009 | HEARTLAND INSTITUTE         | 363309812 | 6,785,374     | 6,499,687           | 195,386                 | 0                             | 58,969            | 31,332       | 3,636,280    | 2           | 3             |
| 2010 | HEARTLAND INSTITUTE         | 363309812 | 6,074,947     | 5,973,500           | 122,985                 | 0                             | 8,537             | -30,075      | 2,366,900    | 2           | 3             |
| 2003 | HERITAGE FOUNDATION         | 237327730 | 31,522,575    | 28,965,584          | 104,291                 | 0                             | 1,739,363         | 713,337      | 5,730,376    | 2           | 3             |
| 2004 | HERITAGE FOUNDATION         | 237327730 | 52,292,374    | 46,940,348          | 85,584                  | 0                             | 3,813,882         | 1,452,560    | 9,491,600    | 2           | 3             |
| 2005 | HERITAGE FOUNDATION         | 237327730 | 46,454,943    | 39,794,253          | 69,010                  | 0                             | 6,362,395         | 229,285      | 7,292,664    | 2           | 3             |
| 2006 | HERITAGE FOUNDATION         | 237327730 | 53,821,085    | 43,629,537          | 91,988                  | 0                             | 9,719,813         | 379,747      | 11,086,164   | 2           | 3             |
| 2007 | HERITAGE FOUNDATION         | 237327730 | 65,765,247    | 47,138,503          | 39,393                  | 0                             | 18,424,214        | 163,137      | 12,385,850   | 2           | 3             |
| 2008 | HERITAGE FOUNDATION         | 237327730 | 70,877,006    | 62,910,593          | 50,250                  | 0                             | 6,378,806         | 1,537,357    | 14,713,785   | 2           | 3             |
| 2009 | HERITAGE FOUNDATION         | 237327730 | 69,230,717    | 71,755,400          | 331,511                 | 0                             | -4,677,979        | 1,118,748    | 8,202,979    | 2           | 3             |

| Year | Name                   | EIN       | Total Revenue | Total Contributions | Program Service Revenue | Membership Dues & Assessments | Investment Income | Other Income | Grant Income | Focus Level | 501 C Subcode |
|------|------------------------|-----------|---------------|---------------------|-------------------------|-------------------------------|-------------------|--------------|--------------|-------------|---------------|
| 2010 | HERITAGE FOUNDATION    | 237327730 | 78,253,864    | 73,957,186          | 432,344                 | 0                             | 2,320,127         | 1,502,482    | 7,462,770    | 2           | 3             |
| 2003 | HUDSON INSTITUTE INC   | 131945157 | 9,343,536     | 7,413,195           | 1,680,079               | 0                             | 203,537           | 46,725       | 1,703,600    | 2           | 3             |
| 2004 | HUDSON INSTITUTE INC   | 131945157 | 8,378,125     | 6,010,638           | 2,258,790               | 0                             | 104,075           | 4,622        | 2,102,200    | 2           | 3             |
| 2005 | HUDSON INSTITUTE INC   | 131945157 | 7,497,881     | 5,334,068           | 1,764,934               | 0                             | 232,511           | 166,368      | 2,772,800    | 2           | 3             |
| 2006 | HUDSON INSTITUTE INC   | 131945157 | 9,859,712     | 7,326,713           | 1,819,499               | 0                             | 706,901           | 6,599        | 3,914,590    | 2           | 3             |
| 2007 | HUDSON INSTITUTE INC   | 131945157 | 10,622,227    | 8,997,270           | 1,591,568               | 0                             | 678,697           | -645,308     | 3,745,850    | 2           | 3             |
| 2008 | HUDSON INSTITUTE INC   | 131945157 | 11,064,171    | 11,239,207          | 3,115,183               | 0                             | -2,751,599        | -538,620     | 5,348,050    | 2           | 3             |
| 2009 | HUDSON INSTITUTE INC   | 131945157 | 12,456,864    | 9,137,117           | 2,757,545               | 0                             | 779,621           | -220,844     | 2,446,969    | 2           | 3             |
| 2010 | HUDSON INSTITUTE INC   | 131945157 | 9,804,595     | 6,728,394           | 2,468,528               | 0                             | 780,524           | -177,647     | 3,913,475    | 2           | 3             |
| 2003 | INDEPENDENCE INSTITUTE | 840990300 | 602,914       | 518,538             | 1,698                   | 0                             | 2,743             | 79,935       | 205,905      | 2           | 3             |
| 2004 | INDEPENDENCE INSTITUTE | 840990300 | 971,395       | 897,223             | 1,536                   | 0                             | 4,313             | 68,323       | 350,250      | 2           | 3             |
| 2005 | INDEPENDENCE INSTITUTE | 840990300 | 1,433,821     | 1,328,903           | -1,675                  | 0                             | 6,591             | 100,002      | 426,661      | 2           | 3             |
| 2006 | INDEPENDENCE INSTITUTE | 840990300 | 1,189,668     | 1,119,690           | 5,233                   | 0                             | 18,583            | 46,162       | 354,148      | 2           | 3             |
| 2007 | INDEPENDENCE INSTITUTE | 840990300 | 1,505,301     | 1,384,697           | 567                     | 0                             | 38,671            | 81,366       | 425,000      | 2           | 3             |
| 2008 | INDEPENDENCE INSTITUTE | 840990300 | 1,823,132     | 1,743,256           | 427                     | 0                             | 49,769            | 29,680       | 725,000      | 2           | 3             |
| 2009 | INDEPENDENCE INSTITUTE | 840990300 | 1,278,351     | 1,239,978           | 4,696                   | 0                             | 36,983            | -3,306       | 805,000      | 2           | 3             |
| 2010 | INDEPENDENCE INSTITUTE | 840990300 | 1,469,690     | 1,412,998           | 2,471                   | 0                             | 27,696            | 26,525       | 636,000      | 2           | 3             |
| 2003 | INDEPENDENT INSTITUTE  | 943008370 | 2,115,806     | 2,135,120           | 170,796                 | 0                             | -190,110          | 0            | 324,000      | 2           | 3             |
| 2004 | INDEPENDENT INSTITUTE  | 943008370 | 2,592,632     | 2,286,677           | 231,695                 | 0                             | 74,260            | 0            | 463,500      | 2           | 3             |
| 2005 | INDEPENDENT INSTITUTE  | 943008370 | 3,007,308     | 2,525,231           | 228,181                 | 0                             | 253,896           | 0            | 1,165,500    | 2           | 3             |

| Year | Name                                         | EIN       | Total Revenue | Total Contributions | Program Service Revenue | Membership Dues & Assessments | Investment Income | Other Income | Grant Income | Focus Level | 501 C Subcode |
|------|----------------------------------------------|-----------|---------------|---------------------|-------------------------|-------------------------------|-------------------|--------------|--------------|-------------|---------------|
| 2006 | INDEPENDENT INSTITUTE                        | 943008370 | 3,046,463     | 2,695,195           | 141,595                 | 0                             | 209,673           | 0            | 911,425      | 2           | 3             |
| 2007 | INDEPENDENT INSTITUTE                        | 943008370 | 3,060,320     | 2,567,883           | 191,119                 | 0                             | 301,318           | 0            | 726,430      | 2           | 3             |
| 2008 | INDEPENDENT INSTITUTE                        | 943008370 | 1,949,174     | 2,539,801           | 140,459                 | 0                             | -731,086          | 0            | 458,680      | 2           | 3             |
| 2009 | INDEPENDENT INSTITUTE                        | 943008370 | 2,361,093     | 2,255,620           | 134,006                 | 0                             | -28,533           | 0            | 611,499      | 2           | 3             |
| 2010 | INDEPENDENT INSTITUTE                        | 943008370 | 2,647,561     | 2,307,595           | 157,989                 | 0                             | 181,977           | 0            | 262,514      | 2           | 3             |
| 2003 | INDEPENDENT PETROLEUM ASSOCIATION OF AMERICA | 730296927 | 4,894,384     | 0                   | 2,228,954               | 2,447,112                     | 59,017            | 159,301      | 0            | 2           | 6             |
| 2004 | INDEPENDENT PETROLEUM ASSOCIATION OF AMERICA | 730296927 | 6,200,856     | 0                   | 2,972,407               | 2,965,991                     | 147,009           | 115,449      | 0            | 2           | 6             |
| 2005 | INDEPENDENT PETROLEUM ASSOCIATION OF AMERICA | 730296927 | 7,031,056     | 197,600             | 3,627,981               | 2,951,671                     | 256,374           | -2,570       | 0            | 2           | 6             |
| 2006 | INDEPENDENT PETROLEUM ASSOCIATION OF AMERICA | 730296927 | 8,239,740     | 184,300             | 4,257,071               | 3,518,860                     | 269,338           | 10,171       | 0            | 2           | 6             |
| 2007 | INDEPENDENT PETROLEUM ASSOCIATION OF AMERICA | 730296927 | 8,185,915     | 85,500              | 4,384,391               | 3,118,795                     | 505,309           | 91,920       | 0            | 2           | 6             |
| 2008 | INDEPENDENT PETROLEUM ASSOCIATION OF AMERICA | 730296927 | 8,877,595     | 176,250             | 4,799,140               | 3,632,785                     | 184,152           | 85,268       | 27,356       | 2           | 6             |
| 2009 | INDEPENDENT PETROLEUM ASSOCIATION OF AMERICA | 730296927 | 8,063,528     | 320,575             | 4,319,892               | 3,214,003                     | 167,401           | 41,657       | 60,000       | 2           | 6             |
| 2010 | INDEPENDENT PETROLEUM ASSOCIATION OF AMERICA | 730296927 | 8,714,606     | 651,288             | 4,166,557               | 3,830,042                     | 215,162           | -148,443     | 100,000      | 2           | 6             |
| 2003 | INDEPENDENT WOMENS FORUM                     | 541670627 | 198,758       | 201,526             | 0                       | 1,304                         | 1,593             | -5,665       | 1,539,000    | 2           | 3             |
| 2004 | INDEPENDENT WOMENS FORUM                     | 541670627 | 1,317,157     | 1,045,863           | 339,780                 | 0                             | 120               | -68,606      | 810,100      | 2           | 3             |
| 2005 | INDEPENDENT WOMENS FORUM                     | 541670627 | 2,338,670     | 1,098,802           | 1,136,718               | 0                             | -942              | 104,092      | 288,500      | 2           | 3             |
| 2006 | INDEPENDENT WOMENS FORUM                     | 541670627 | 1,816,131     | 1,316,295           | 661,216                 | 0                             | -132              | -161,248     | 310,000      | 2           | 3             |
| 2007 | INDEPENDENT WOMENS FORUM                     | 541670627 | 1,877,244     | 1,665,974           | 392,240                 | 0                             | -12,070           | -168,900     | 496,157      | 2           | 3             |
| 2008 | INDEPENDENT WOMENS FORUM                     | 541670627 | 1,366,203     | 1,269,311           | 0                       | 0                             | 793               | 96,099       | 305,000      | 2           | 3             |
| 2009 | INDEPENDENT WOMENS FORUM                     | 541670627 | 4,263,640     | 4,128,890           | 0                       | 0                             | 1,619             | 133,131      | 3,322,000    | 2           | 3             |

| Year | Name                                                                                           | EIN       | Total Revenue | Total Contributions | Program Service Revenue | Membership Dues & Assessments | Investment Income | Other Income | Grant Income | Focus Level | 501 C Subcode |
|------|------------------------------------------------------------------------------------------------|-----------|---------------|---------------------|-------------------------|-------------------------------|-------------------|--------------|--------------|-------------|---------------|
| 2010 | INDEPENDENT WOMENS FORUM                                                                       | 541670627 | 858,876       | 858,614             | 0                       | 0                             | 262               | 0            | 374,250      | 2           | 3             |
| 2003 | INDUSTRIAL ENERGY CONSUMERS OF AMERICA/INTERNATIONAL FEDERATION OF INDUSTRIAL ENERGY CONSUMERS | 222466569 | 158,545       | 0                   | 0                       | 158,125                       | 420               | 0            | 0            | 2           | 6             |
| 2004 | INDUSTRIAL ENERGY CONSUMERS OF AMERICA/INTERNATIONAL FEDERATION OF INDUSTRIAL ENERGY CONSUMERS | 222466569 | 239,892       | 0                   | 0                       | 239,875                       | 0                 | 0            | 0            | 2           | 6             |
| 2005 | INDUSTRIAL ENERGY CONSUMERS OF AMERICA/INTERNATIONAL FEDERATION OF INDUSTRIAL ENERGY CONSUMERS | 222466569 | 254,160       | 0                   | 0                       | 254,089                       | 71                | 0            | 0            | 2           | 6             |
| 2006 | INDUSTRIAL ENERGY CONSUMERS OF AMERICA/INTERNATIONAL FEDERATION OF INDUSTRIAL ENERGY CONSUMERS | 222466569 | 213,425       | 0                   | 0                       | 213,335                       | 90                | 0            | 0            | 2           | 6             |
| 2007 | INDUSTRIAL ENERGY CONSUMERS OF AMERICA/INTERNATIONAL FEDERATION OF INDUSTRIAL ENERGY CONSUMERS | 222466569 | 193,577       | 0                   | 0                       | 191,026                       | 2,551             | 0            | 0            | 2           | 6             |
| 2008 | INDUSTRIAL ENERGY CONSUMERS OF AMERICA/INTERNATIONAL FEDERATION OF INDUSTRIAL ENERGY CONSUMERS | 222466569 | 326,152       | 0                   | 0                       | 323,235                       | 2,917             | 0            | 0            | 2           | 6             |
| 2009 | INDUSTRIAL ENERGY CONSUMERS OF AMERICA/INTERNATIONAL FEDERATION OF INDUSTRIAL ENERGY CONSUMERS | 222466569 | 353,753       | 0                   | 0                       | 352,117                       | 1,636             | 0            | 0            | 2           | 6             |
| 2010 | INDUSTRIAL ENERGY CONSUMERS OF AMERICA/INTERNATIONAL FEDERATION OF INDUSTRIAL ENERGY CONSUMERS | 222466569 | 580,637       | 0                   | 0                       | 579,340                       | 1,297             | 0            | 0            | 2           | 6             |
| 2003 | INSTITUTE FOR ENERGY RESEARCH                                                                  | 760149778 | 208,540       | 193,309             | 14,042                  | 0                             | 638               | 551          | 10,000       | 2           | 3             |
| 2004 | INSTITUTE FOR ENERGY RESEARCH                                                                  | 760149778 | 230,608       | 222,483             | 7,800                   | 0                             | 750               | -425         | 0            | 2           | 3             |
| 2005 | INSTITUTE FOR ENERGY RESEARCH                                                                  | 760149778 | 213,384       | 206,600             | 7,500                   | 0                             | 1,506             | -2,222       | 0            | 2           | 3             |
| 2006 | INSTITUTE FOR ENERGY RESEARCH                                                                  | 760149778 | 241,542       | 241,725             | 5,525                   | 0                             | 2,381             | -8,089       | 0            | 2           | 3             |
| 2007 | INSTITUTE FOR ENERGY RESEARCH                                                                  | 760149778 | 988,987       | 982,950             | 2,032                   | 0                             | 3,977             | 28           | 65,000       | 2           | 3             |
| 2008 | INSTITUTE FOR ENERGY RESEARCH                                                                  | 760149778 | 2,749,419     | 2,714,964           | 22,904                  | 0                             | 11,551            | 0            | 360,000      | 2           | 3             |
| 2009 | INSTITUTE FOR ENERGY RESEARCH                                                                  | 760149778 | 2,266,196     | 2,307,704           | 7,745                   | 0                             | 2,876             | -52,129      | 460,000      | 2           | 3             |
| 2010 | INSTITUTE FOR ENERGY RESEARCH                                                                  | 760149778 | 2,364,261     | 2,387,289           | 9,510                   | 0                             | 2,865             | -35,403      | 405,000      | 2           | 3             |
| 2006 | INSTITUTE FOR LIBERTY                                                                          | 202641983 | 333,500       | 333,500             | 0                       | 0                             | 0                 | 0            | 0            | 2           | 4             |
| 2007 | INSTITUTE FOR LIBERTY                                                                          | 202641983 | 92,500        | 92,500              | 0                       | 0                             | 0                 | 0            | 0            | 2           | 4             |

| Year | Name                                     | EIN       | Total Revenue | Total Contributions | Program Service Revenue | Membership Dues & Assessments | Investment Income | Other Income | Grant Income | Focus Level | 501 C Subcode |
|------|------------------------------------------|-----------|---------------|---------------------|-------------------------|-------------------------------|-------------------|--------------|--------------|-------------|---------------|
| 2008 | INSTITUTE FOR LIBERTY                    | 202641983 | 52,060        | 52,060              | 0                       | 0                             | 0                 | 0            | 0            | 2           | 4             |
| 2009 | INSTITUTE FOR LIBERTY                    | 202641983 | 1,846,645     | 1,846,645           | 0                       | 0                             | 0                 | 0            | 0            | 2           | 4             |
| 2010 | INSTITUTE FOR LIBERTY                    | 202641983 | 664,396       | 664,396             | 0                       | 0                             | 0                 | 0            | 0            | 2           | 4             |
| 2003 | INSTITUTE FOR THE STUDY OF EARTH AND MAN | 756052408 | 189,942       | 111,514             | 35,755                  | 0                             | 8,309             | 34,364       | 0            | 2           | 3             |
| 2004 | INSTITUTE FOR THE STUDY OF EARTH AND MAN | 756052408 | 233,731       | 167,740             | 32,890                  | 0                             | 8,383             | 24,718       | 25,000       | 2           | 3             |
| 2005 | INSTITUTE FOR THE STUDY OF EARTH AND MAN | 756052408 | 459,470       | 147,636             | 61,193                  | 0                             | 24,013            | 226,628      | 0            | 2           | 3             |
| 2006 | INSTITUTE FOR THE STUDY OF EARTH AND MAN | 756052408 | 156,613       | 76,815              | 56,295                  | 0                             | 23,503            | 0            | 25,000       | 2           | 3             |
| 2007 | INSTITUTE FOR THE STUDY OF EARTH AND MAN | 756052408 | 154,587       | 96,218              | 30,692                  | 0                             | 27,677            | 0            | 50,000       | 2           | 3             |
| 2008 | INSTITUTE FOR THE STUDY OF EARTH AND MAN | 756052408 | 43,172        | 101,994             | 0                       | 0                             | -58,822           | 0            | 25,000       | 2           | 3             |
| 2009 | INSTITUTE FOR THE STUDY OF EARTH AND MAN | 756052408 | 120,538       | 117,805             | 0                       | 0                             | 2,733             | 0            | 0            | 2           | 3             |
| 2010 | INSTITUTE FOR THE STUDY OF EARTH AND MAN | 756052408 | 403,922       | 403,879             |                         | 0                             | 43                | 0            | 0            | 2           | 3             |
| 2003 | INTERMOUNTAIN RURAL ELECTRIC ASSOCIATION | 840235244 | 140,961,287   | 0                   | 140,776,326             | 0                             | 184,961           | 0            | 0            | 2           | 12            |
| 2004 | INTERMOUNTAIN RURAL ELECTRIC ASSOCIATION | 840235244 | 153,552,044   | 0                   | 153,386,751             | 0                             | 164,693           | 600          | 0            | 2           | 12            |
| 2005 | INTERMOUNTAIN RURAL ELECTRIC ASSOCIATION | 840235244 | 185,573,209   | 0                   | 185,372,182             | 0                             | 200,477           | 550          | 0            | 2           | 12            |
| 2006 | INTERMOUNTAIN RURAL ELECTRIC ASSOCIATION | 840235244 | 192,033,560   | 0                   | 191,807,643             | 0                             | 224,917           | 1,000        | 0            | 2           | 12            |
| 2007 | INTERMOUNTAIN RURAL ELECTRIC ASSOCIATION | 840235244 | 195,181,645   | 0                   | 194,969,129             | 0                             | 184,258           | 28,258       | 0            | 2           | 12            |
| 2008 | INTERMOUNTAIN RURAL ELECTRIC ASSOCIATION | 840235244 | 212,862,673   | 0                   | 212,662,544             | 0                             | 200,129           | 0            | 0            | 2           | 12            |
| 2009 | INTERMOUNTAIN RURAL ELECTRIC ASSOCIATION | 840235244 | 202,802,748   | 0                   | 202,627,065             | 0                             | 175,683           | 0            | 0            | 2           | 12            |
| 2010 | INTERMOUNTAIN RURAL ELECTRIC ASSOCIATION | 840235244 | 246,495,772   | 0                   | 246,330,850             | 0                             | 163,556           | 1,366        | 0            | 2           | 12            |
| 2003 | INTERNATIONAL POLICY NETWORK             | 522363626 | 491,332       | 441,670             | 46,430                  | 0                             | 3,037             | 195          | 60,000       | 2           | 6             |

| Year | Name                                                  | EIN       | Total Revenue | Total Contributions | Program Service Revenue | Membership Dues & Assessments | Investment Income | Other Income | Grant Income | Focus Level | 501 C Subcode |
|------|-------------------------------------------------------|-----------|---------------|---------------------|-------------------------|-------------------------------|-------------------|--------------|--------------|-------------|---------------|
| 2004 | INTERNATIONAL POLICY NETWORK                          | 522363626 | 694,819       | 660,526             | 34,250                  | 0                             | 679               | -636         | 47,820       | 2           | 6             |
| 2005 | INTERNATIONAL POLICY NETWORK                          | 522363626 | 889,411       | 815,489             | 67,729                  | 0                             | 1,051             | 5,142        | 124,000      | 2           | 6             |
| 2006 | INTERNATIONAL POLICY NETWORK                          | 522363626 | 1,093,102     | 1,017,694           | 97,848                  | 0                             | 1,236             | -23,676      | 68,500       | 2           | 6             |
| 2007 | INTERNATIONAL POLICY NETWORK                          | 522363626 | 1,187,599     | 1,299,290           | 82,620                  | 0                             | 1,805             | -22,480      | 72,500       | 2           | 6             |
| 2008 | INTERNATIONAL POLICY NETWORK                          | 522363626 | 1,282,095     | 1,271,217           | 46,998                  | 0                             | 1,914             | -38,034      | 140,000      | 2           | 6             |
| 2009 | INTERNATIONAL POLICY NETWORK                          | 522363626 | 1,164,603     | 1,065,385           | 105,535                 | 0                             | 0                 | -6,317       | 96,500       | 2           | 6             |
| 2010 | INTERNATIONAL POLICY NETWORK                          | 522363626 | 1,260,178     | 1,203,979           | 59,530                  | 0                             | 0                 | -3,331       | 499,850      | 2           | 6             |
| 2003 | JAMES MADISON INSTITUTE FOR PUBLIC POLICY STUDIES INC | 592811908 | 463,025       | 460,587             | 6,155                   | 0                             | 1,200             | -4,917       | 75,000       | 2           | 3             |
| 2004 | JAMES MADISON INSTITUTE FOR PUBLIC POLICY STUDIES INC | 592811908 | 380,144       | 353,701             | 13,970                  | 0                             | 181               | 12,292       | 65,000       | 2           | 3             |
| 2005 | JAMES MADISON INSTITUTE FOR PUBLIC POLICY STUDIES INC | 592811908 | 659,603       | 635,118             | 17,488                  | 0                             | 2,244             | 4,753        | 170,000      | 2           | 3             |
| 2006 | JAMES MADISON INSTITUTE FOR PUBLIC POLICY STUDIES INC | 592811908 | 720,165       | 677,818             | 30,700                  | 0                             | 3,480             | 8,167        | 75,500       | 2           | 3             |
| 2007 | JAMES MADISON INSTITUTE FOR PUBLIC POLICY STUDIES INC | 592811908 | 806,041       | 749,654             | 46,080                  | 0                             | 3,239             | 7,068        | 269,950      | 2           | 3             |
| 2008 | JAMES MADISON INSTITUTE FOR PUBLIC POLICY STUDIES INC | 592811908 | 920,244       | 779,231             | 136,997                 | 0                             | 1,478             | 2,538        | 297,924      | 2           | 3             |
| 2009 | JAMES MADISON INSTITUTE FOR PUBLIC POLICY STUDIES INC | 592811908 | 909,458       | 890,388             | 6,945                   | 0                             | 125               | 12,000       | 397,667      | 2           | 3             |
| 2010 | JAMES MADISON INSTITUTE FOR PUBLIC POLICY STUDIES INC | 592811908 | 1,785,368     | 1,766,405           | 6,458                   | 0                             | 505               | 12,000       | 838,000      | 2           | 3             |
| 2003 | JOHN LOCKE FOUNDATION INC                             | 561656943 | 1,819,435     | 1,790,367           |                         | 0                             | 2                 | 29,066       | 1,613,714    | 2           | 3             |
| 2004 | JOHN LOCKE FOUNDATION INC                             | 561656943 | 2,072,325     | 2,016,444           |                         | 0                             | 0                 | 56,760       | 1,649,707    | 2           | 3             |
| 2005 | JOHN LOCKE FOUNDATION INC                             | 561656943 | 3,277,113     | 3,158,398           |                         | 0                             | 0                 | 117,801      | 1,840,619    | 2           | 3             |
| 2006 | JOHN LOCKE FOUNDATION INC                             | 561656943 | 3,131,617     | 3,032,506           | 86,665                  | 0                             | 12,446            | 0            | 2,842,957    | 2           | 3             |
| 2007 | JOHN LOCKE FOUNDATION INC                             | 561656943 | 3,244,924     | 3,148,132           | 90,092                  | 0                             | 6,775             | -75          | 2,696,008    | 2           | 3             |



| Year | Name                                        | EIN       | Total Revenue | Total Contributions | Program Service Revenue | Membership Dues & Assessments | Investment Income | Other Income | Grant Income | Focus Level | 501 C Subcode |
|------|---------------------------------------------|-----------|---------------|---------------------|-------------------------|-------------------------------|-------------------|--------------|--------------|-------------|---------------|
| 2008 | JOHN LOCKE FOUNDATION INC                   | 561656943 | 3,291,649     | 3,189,977           | 67,559                  | 0                             | 134               | 33,979       | 2,789,508    | 2           | 3             |
| 2009 | JOHN LOCKE FOUNDATION INC                   | 561656943 | 3,623,971     | 3,529,484           | 81,315                  | 0                             | 384               | 12,788       | 1,842,826    | 2           | 3             |
| 2010 | JOHN LOCKE FOUNDATION INC                   | 561656943 | 3,898,632     | 3,821,433           | 49,785                  | 0                             | 1,200             | 26,214       | 2,724,508    | 2           | 3             |
| 2003 | LANDMARK LEGAL FOUNDATION                   | 510203802 | 1,728,056     | 1,485,211           | 195,000                 | 0                             | 47,944            | -99          | 826,000      | 2           | 3             |
| 2004 | LANDMARK LEGAL FOUNDATION                   | 510203802 | 1,870,228     | 1,825,464           | 0                       | 0                             | 44,394            | 370          | 1,086,300    | 2           | 3             |
| 2005 | LANDMARK LEGAL FOUNDATION                   | 510203802 | 1,794,247     | 1,730,445           | 0                       | 0                             | 63,092            | 710          | 1,307,000    | 2           | 3             |
| 2006 | LANDMARK LEGAL FOUNDATION                   | 510203802 | 1,587,485     | 1,462,739           |                         | 0                             | 124,588           | 158          | 1,072,600    | 2           | 3             |
| 2007 | LANDMARK LEGAL FOUNDATION                   | 510203802 | 1,820,665     | 1,649,870           | 0                       | 0                             | 171,434           | -639         | 807,600      | 2           | 3             |
| 2008 | LANDMARK LEGAL FOUNDATION                   | 510203802 | 1,237,999     | 1,117,371           | 0                       | 0                             | 120,396           | 232          | 721,500      | 2           | 3             |
| 2009 | LANDMARK LEGAL FOUNDATION                   | 510203802 | 1,209,950     | 1,150,994           | 0                       | 0                             | 58,752            | 204          | 665,000      | 2           | 3             |
| 2010 | LANDMARK LEGAL FOUNDATION                   | 510203802 | 3,051,812     | 3,015,944           |                         | 0                             | 35,676            | 0            | 467,750      | 2           | 3             |
| 2003 | MANHATTAN INSTITUTE FOR POLICY RESEARCH INC | 132912529 | 10,770,786    | 9,500,758           | 114,971                 | 0                             | 188,892           | 966,165      | 3,154,200    | 2           | 3             |
| 2004 | MANHATTAN INSTITUTE FOR POLICY RESEARCH INC | 132912529 | 13,876,700    | 12,526,737          | 149,018                 | 0                             | 123,027           | 1,077,918    | 3,738,317    | 2           | 3             |
| 2005 | MANHATTAN INSTITUTE FOR POLICY RESEARCH INC | 132912529 | 13,296,150    | 12,108,063          | 143,814                 | 0                             | 179,704           | 864,569      | 4,290,492    | 2           | 3             |
| 2006 | MANHATTAN INSTITUTE FOR POLICY RESEARCH INC | 132912529 | 12,593,168    | 10,798,176          | 230,284                 | 0                             | 544,250           | 1,020,458    | 4,845,630    | 2           | 3             |
| 2007 | MANHATTAN INSTITUTE FOR POLICY RESEARCH INC | 132912529 | 12,603,779    | 10,064,776          | 110,178                 | 0                             | 1,527,883         | 900,942      | 4,809,143    | 2           | 3             |
| 2008 | MANHATTAN INSTITUTE FOR POLICY RESEARCH INC | 132912529 | 9,741,804     | 11,110,477          |                         | 0                             | 0                 | 0            | 4,930,919    | 2           | 3             |
| 2009 | MANHATTAN INSTITUTE FOR POLICY RESEARCH INC | 132912529 | 10,527,178    | 11,868,502          | 71,255                  | 0                             | 179,590           | -1,618,072   | 4,204,850    | 2           | 3             |
| 2010 | MANHATTAN INSTITUTE FOR POLICY RESEARCH INC | 132912529 | 6,128,425     | 5,607,838           | 51,323                  | 0                             | 87,357            | 373,368      | 3,140,400    | 2           | 3             |
| 2003 | MEDIA RESEARCH CENTER INC                   | 541429009 | 8,391,366     | 8,067,042           | 88,093                  | 0                             | 27,827            | 208,404      | 1,793,756    | 2           | 3             |

| Year | Name                                            | EIN       | Total Revenue | Total Contributions | Program Service Revenue | Membership Dues & Assessments | Investment Income | Other Income | Grant Income | Focus Level | 501 C Subcode |
|------|-------------------------------------------------|-----------|---------------|---------------------|-------------------------|-------------------------------|-------------------|--------------|--------------|-------------|---------------|
| 2004 | MEDIA RESEARCH CENTER INC                       | 541429009 | 6,307,600     | 5,961,294           | 84,714                  | 0                             | 37,863            | 223,729      | 718,221      | 2           | 3             |
| 2005 | MEDIA RESEARCH CENTER INC                       | 541429009 | 11,231,507    | 10,858,541          | 119,485                 | 0                             | 37,408            | 216,073      | 765,520      | 2           | 3             |
| 2006 | MEDIA RESEARCH CENTER INC                       | 541429009 | 9,344,288     | 8,540,168           | 126,427                 | 0                             | 446,497           | 231,196      | 2,160,900    | 2           | 3             |
| 2007 | MEDIA RESEARCH CENTER INC                       | 541429009 | 12,052,965    | 11,223,532          | 45,125                  | 0                             | 391,064           | 393,244      | 1,397,700    | 2           | 3             |
| 2008 | MEDIA RESEARCH CENTER INC                       | 541429009 | 11,253,890    | 11,498,542          | 15,780                  | 0                             | -743,097          | 482,665      | 1,603,000    | 2           | 3             |
| 2009 | MEDIA RESEARCH CENTER INC                       | 541429009 | 10,802,721    | 10,601,793          | 16,037                  | 0                             | -108,925          | 293,816      | 2,516,000    | 2           | 3             |
| 2010 | MEDIA RESEARCH CENTER INC                       | 541429009 | 12,631,050    | 11,886,940          | 36,601                  | 0                             | 388,023           | 319,486      | 3,539,750    | 2           | 3             |
| 2003 | MERCATUS CENTER/CENTER FOR MARKET PROCESSSS INC | 541436224 | 4,467,047     | 4,052,000           | 178,029                 | 0                             | 232,581           | 4,437        | 224,000      | 2           | 3             |
| 2004 | MERCATUS CENTER/CENTER FOR MARKET PROCESSSS INC | 541436224 | 3,253,419     | 3,067,890           | 70,091                  | 0                             | 123,321           | -7,883       | 301,500      | 2           | 3             |
| 2005 | MERCATUS CENTER/CENTER FOR MARKET PROCESSSS INC | 541436224 | 4,891,517     | 4,845,564           | 110                     | 0                             | 37,422            | 8,421        | 1,794,000    | 2           | 3             |
| 2006 | MERCATUS CENTER/CENTER FOR MARKET PROCESSSS INC | 541436224 | 6,719,629     | 6,561,609           | 64,640                  | 0                             | 74,861            | 18,519       | 4,554,471    | 2           | 3             |
| 2007 | MERCATUS CENTER/CENTER FOR MARKET PROCESSSS INC | 541436224 | 9,738,259     | 9,630,804           | 0                       | 0                             | 96,691            | 10,764       | 3,370,192    | 2           | 3             |
| 2008 | MERCATUS CENTER/CENTER FOR MARKET PROCESSSS INC | 541436224 | 9,089,217     | 9,033,073           | 0                       | 0                             | 47,811            | 8,333        | 1,719,500    | 2           | 3             |
| 2009 | MERCATUS CENTER/CENTER FOR MARKET PROCESSSS INC | 541436224 | 7,865,484     | 7,837,975           | 0                       | 0                             | 12,309            | 15,200       | 645,300      | 2           | 3             |
| 2010 | MERCATUS CENTER/CENTER FOR MARKET PROCESSSS INC | 541436224 | 8,075,737     | 8,042,253           | 0                       | 0                             | 8,996             | 24,488       | 1,784,700    | 2           | 3             |
| 2003 | MOUNTAIN STATES LEGAL FOUNDATION                | 840736725 | 2,455,725     | 2,146,534           | 225,000                 | 0                             | 10,111            | 74,080       | 118,500      | 2           | 3             |
| 2004 | MOUNTAIN STATES LEGAL FOUNDATION                | 840736725 | 2,162,077     | 1,937,330           | 150,000                 | 0                             | 10,535            | 64,212       | 87,500       | 2           | 3             |
| 2005 | MOUNTAIN STATES LEGAL FOUNDATION                | 840736725 | 3,273,324     | 3,165,291           | 40,411                  | 0                             | 31,781            | 35,841       | 114,500      | 2           | 3             |
| 2006 | MOUNTAIN STATES LEGAL FOUNDATION                | 840736725 | 2,603,113     | 2,436,842           | 25,225                  | 0                             | 44,382            | 96,664       | 44,500       | 2           | 3             |
| 2007 | MOUNTAIN STATES LEGAL FOUNDATION                | 840736725 | 2,987,987     | 2,826,558           | 51,576                  | 0                             | 57,406            | 52,447       | 140,750      | 2           | 3             |

| Year | Name                                             | EIN       | Total Revenue | Total Contributions | Program Service Revenue | Membership Dues & Assessments | Investment Income | Other Income | Grant Income | Focus Level | 501 C Subcode |
|------|--------------------------------------------------|-----------|---------------|---------------------|-------------------------|-------------------------------|-------------------|--------------|--------------|-------------|---------------|
| 2008 | MOUNTAIN STATES LEGAL FOUNDATION                 | 840736725 | 2,420,627     | 2,335,756           | 0                       | 0                             | 38,594            | 46,277       | 131,100      | 2           | 3             |
| 2009 | MOUNTAIN STATES LEGAL FOUNDATION                 | 840736725 | 2,295,025     | 2,261,690           | 0                       | 0                             | 11,635            | 21,700       | 139,000      | 2           | 3             |
| 2010 | MOUNTAIN STATES LEGAL FOUNDATION                 | 840736725 | 2,411,521     | 2,379,519           | 0                       | 0                             | 12,375            | 19,627       | 94,000       | 2           | 3             |
| 2003 | NATIONAL ASSOCIATION OF MANUFACTURERS OF THE USA | 131084330 | 25,107,856    | 2,738,130           | 1,541,491               | 20,582,995                    | 219,830           | 25,410       | 0            | 2           | 6             |
| 2004 | NATIONAL ASSOCIATION OF MANUFACTURERS OF THE USA | 131084330 | 30,416,240    | 5,726,415           | 2,289,478               | 21,687,729                    | 704,423           | 8,195        | 0            | 2           | 6             |
| 2005 | NATIONAL ASSOCIATION OF MANUFACTURERS OF THE USA | 131084330 | 30,964,395    | 4,362,204           | 2,513,507               | 23,125,807                    | 806,854           | 156,023      | 0            | 2           | 6             |
| 2006 | NATIONAL ASSOCIATION OF MANUFACTURERS OF THE USA | 131084330 | 40,579,243    | 11,816,763          | 2,342,461               | 24,517,236                    | 1,331,857         | 570,926      | 0            | 2           | 6             |
| 2007 | NATIONAL ASSOCIATION OF MANUFACTURERS OF THE USA | 131084330 | 33,649,251    | 4,194,522           | 1,633,800               | 25,856,329                    | 1,953,810         | 10,790       | 0            | 2           | 6             |
| 2008 | NATIONAL ASSOCIATION OF MANUFACTURERS OF THE USA | 131084330 | 25,980,521    | 2,076,744           | 1,337,901               | 26,596,647                    | -4,053,554        | 22,783       | 1,163,650    | 2           | 6             |
| 2009 | NATIONAL ASSOCIATION OF MANUFACTURERS OF THE USA | 131084330 | 34,577,079    | 6,314,362           | 1,204,436               | 26,772,039                    | 258,940           | 27,302       | 0            | 2           | 6             |
| 2010 | NATIONAL ASSOCIATION OF MANUFACTURERS OF THE USA | 131084330 | 34,931,240    | 5,866,399           | 1,152,193               | 27,648,666                    | 223,393           | 40,589       | 0            | 2           | 6             |
| 2003 | NATIONAL CENTER FOR POLICY ANALYSIS              | 751804932 | 3,878,861     | 3,825,505           | 111,598                 | 0                             | -55,994           | -2,248       | 1,649,100    | 2           | 3             |
| 2004 | NATIONAL CENTER FOR POLICY ANALYSIS              | 751804932 | 5,172,853     | 5,025,242           | 128,746                 | 0                             | 18,865            | 0            | 1,893,670    | 2           | 3             |
| 2005 | NATIONAL CENTER FOR POLICY ANALYSIS              | 751804932 | 6,830,106     | 6,600,187           | 161,990                 | 0                             | 67,929            | 0            | 2,247,405    | 2           | 3             |
| 2006 | NATIONAL CENTER FOR POLICY ANALYSIS              | 751804932 | 5,171,840     | 4,849,377           | 179,287                 | 0                             | 143,176           | 0            | 1,694,926    | 2           | 3             |
| 2007 | NATIONAL CENTER FOR POLICY ANALYSIS              | 751804932 | 8,726,229     | 8,370,071           | 241,749                 | 0                             | 228,549           | -114,140     | 2,012,241    | 2           | 3             |
| 2008 | NATIONAL CENTER FOR POLICY ANALYSIS              | 751804932 | 4,102,806     | 3,909,824           | 181,912                 | 0                             | 11,070            | 0            | 1,809,200    | 2           | 3             |
| 2009 | NATIONAL CENTER FOR POLICY ANALYSIS              | 751804932 | 4,222,443     | 4,060,206           | 79,659                  | 0                             | 82,578            | 0            | 1,635,995    | 2           | 3             |
| 2010 | NATIONAL CENTER FOR POLICY ANALYSIS              | 751804932 | 6,760,824     | 6,603,906           | 127,938                 | 0                             | 28,980            | 0            | 993,500      | 2           | 3             |
| 2003 | NATIONAL CENTER FOR PUBLIC POLICY RESEARCH INC   | 521226614 | 6,532,505     | 6,532,320           | 0                       | 0                             | 0                 | 185          | 135,000      | 2           | 3             |

| Year | Name                                                                                        | EIN       | Total Revenue | Total Contributions | Program Service Revenue | Membership Dues & Assessments | Investment Income | Other Income | Grant Income | Focus Level | 501 C Subcode |
|------|---------------------------------------------------------------------------------------------|-----------|---------------|---------------------|-------------------------|-------------------------------|-------------------|--------------|--------------|-------------|---------------|
| 2004 | NATIONAL CENTER FOR PUBLIC POLICY RESEARCH INC                                              | 521226614 | 8,747,319     | 8,739,552           |                         | 0                             | 119               | 7,648        | 145,000      | 2           | 3             |
| 2005 | NATIONAL CENTER FOR PUBLIC POLICY RESEARCH INC                                              | 521226614 | 7,407,443     | 7,420,844           | 0                       | 0                             | 1,035             | -14,436      | 121,000      | 2           | 3             |
| 2006 | NATIONAL CENTER FOR PUBLIC POLICY RESEARCH INC                                              | 521226614 | 5,402,383     | 5,404,826           | 0                       | 0                             | 8,985             | -11,428      | 64,700       | 2           | 3             |
| 2007 | NATIONAL CENTER FOR PUBLIC POLICY RESEARCH INC                                              | 521226614 | 6,323,628     | 6,323,126           | 0                       | 0                             | 12,325            | -11,823      | 50,000       | 2           | 3             |
| 2008 | NATIONAL CENTER FOR PUBLIC POLICY RESEARCH INC                                              | 521226614 | 8,607,003     | 8,625,361           | 0                       | 0                             | 1,317             | -19,675      | 40,000       | 2           | 3             |
| 2009 | NATIONAL CENTER FOR PUBLIC POLICY RESEARCH INC                                              | 521226614 | 11,632,527    | 11,609,920          | 0                       | 0                             | 6,677             | 15,930       | 35,000       | 2           | 3             |
| 2010 | NATIONAL CENTER FOR PUBLIC POLICY RESEARCH INC                                              | 521226614 | 12,424,796    | 12,445,716          |                         | 0                             | 12,665            | -33,585      | 69,750       | 2           | 3             |
| 2003 | NATIONAL MINING ASSOCIATION                                                                 | 521916480 | 11,819,163    | 222,701             | 7,163                   | 11,146,084                    | 327,083           | 116,132      | 0            | 2           | 6             |
| 2004 | NATIONAL MINING ASSOCIATION                                                                 | 521916480 | 23,224,119    | 0                   | 11,708,670              | 10,737,465                    | 779,686           | -1,702       | 0            | 2           | 6             |
| 2005 | NATIONAL MINING ASSOCIATION                                                                 | 521916480 | 11,137,626    | 0                   | 57,598                  | 10,244,287                    | 821,614           | 14,127       | 0            | 2           | 6             |
| 2006 | NATIONAL MINING ASSOCIATION                                                                 | 521916480 | 11,080,837    | 0                   | 860,756                 | 9,045,571                     | -8,909            | -46,560      | 0            | 2           | 6             |
| 2007 | NATIONAL MINING ASSOCIATION                                                                 | 521916480 | 14,168,229    | 0                   | 1,641,924               | 11,332,308                    | 1,188,575         | 5,422        | 0            | 2           | 6             |
| 2008 | NATIONAL MINING ASSOCIATION                                                                 | 521916480 | 32,543,990    | 0                   | 18,313,441              | 14,291,315                    | -66,165           | 0            | 0            | 2           | 6             |
| 2009 | NATIONAL MINING ASSOCIATION                                                                 | 521916480 | 15,125,480    | 1,467,473           | 137,649                 | 12,982,248                    | 522,521           | 15,589       | 0            | 2           | 6             |
| 2010 | NATIONAL MINING ASSOCIATION                                                                 | 521916480 | 16,558,296    | 1,493,748           | 198,638                 | 14,049,072                    | 802,169           | 108,252      | 0            | 2           | 6             |
| 2003 | NATIONAL PETROCHEMICAL & REFINERS ASSOCIATION/AMERICAN FUEL AND PETROCHEMICAL MANUFACTURERS | 530115970 | 6,661,299     | 0                   | 4,251,079               | 2,155,720                     | 247,565           | 6,935        | 0            | 2           | 6             |
| 2004 | NATIONAL PETROCHEMICAL & REFINERS ASSOCIATION/AMERICAN FUEL AND PETROCHEMICAL MANUFACTURERS | 530115970 | 9,114,665     | 0                   | 6,110,924               | 2,600,738                     | 398,671           | 4,332        | 0            | 2           | 6             |
| 2005 | NATIONAL PETROCHEMICAL & REFINERS ASSOCIATION/AMERICAN FUEL AND PETROCHEMICAL MANUFACTURERS | 530115970 | 9,677,082     | 0                   | 5,436,055               | 3,641,781                     | 584,643           | 14,603       | 0            | 2           | 6             |
| 2006 | NATIONAL PETROCHEMICAL & REFINERS ASSOCIATION/AMERICAN FUEL AND PETROCHEMICAL MANUFACTURERS | 530115970 | 10,224,459    | 0                   | 5,884,049               | 3,466,226                     | 868,674           | 5,510        | 0            | 2           | 6             |

| Year | Name                                                                                        | EIN       | Total Revenue | Total Contributions | Program Service Revenue | Membership Dues & Assessments | Investment Income | Other Income | Grant Income | Focus Level | 501 C Subcode |
|------|---------------------------------------------------------------------------------------------|-----------|---------------|---------------------|-------------------------|-------------------------------|-------------------|--------------|--------------|-------------|---------------|
| 2007 | NATIONAL PETROCHEMICAL & REFINERS ASSOCIATION/AMERICAN FUEL AND PETROCHEMICAL MANUFACTURERS | 530115970 | 10,528,251    | 0                   | 6,426,970               | 3,412,143                     | 689,138           | 0            | 0            | 2           | 6             |
| 2008 | NATIONAL PETROCHEMICAL & REFINERS ASSOCIATION/AMERICAN FUEL AND PETROCHEMICAL MANUFACTURERS | 530115970 | 10,608,437    | 0                   | 6,806,002               | 3,794,770                     | 7,665             | 0            | 0            | 2           | 6             |
| 2009 | NATIONAL PETROCHEMICAL & REFINERS ASSOCIATION/AMERICAN FUEL AND PETROCHEMICAL MANUFACTURERS | 530115970 | 10,728,011    |                     | 5,467,065               | 3,913,614                     | -761,038          | 3,070        | 0            | 2           | 6             |
| 2010 | NATIONAL PETROCHEMICAL & REFINERS ASSOCIATION/AMERICAN FUEL AND PETROCHEMICAL MANUFACTURERS | 530115970 | 14,371,543    |                     | 8,105,089               | 5,651,625                     | 597,945           | 16,884       | 45,000       | 2           | 6             |
| 2003 | NATIONAL PETROLEUM COUNCIL                                                                  | 530182304 | 3,199,041     | 3,180,627           | 2,465                   | 0                             | 15,949            | 0            | 0            | 2           | 6             |
| 2004 | NATIONAL PETROLEUM COUNCIL                                                                  | 530182304 | 2,871,731     | 2,844,868           | 20,517                  | 0                             | 6,346             | 0            | 0            | 2           | 6             |
| 2005 | NATIONAL PETROLEUM COUNCIL                                                                  | 530182304 | 3,967,161     | 3,937,089           | 17,998                  | 0                             | 0                 | 0            | 0            | 2           | 6             |
| 2006 | NATIONAL PETROLEUM COUNCIL                                                                  | 530182304 | 4,630,007     | 4,586,276           | 17,908                  | 0                             | 25,823            | 0            | 0            | 2           | 6             |
| 2007 | NATIONAL PETROLEUM COUNCIL                                                                  | 530182304 | 4,560,085     | 4,489,854           | 4,109                   | 0                             | 66,122            | 0            | 0            | 2           | 6             |
| 2008 | NATIONAL PETROLEUM COUNCIL                                                                  | 530182304 | 4,006,829     | 3,949,080           | 9,707                   | 0                             | 48,042            | 0            | 0            | 2           | 6             |
| 2009 | NATIONAL PETROLEUM COUNCIL                                                                  | 530182304 | 3,540,751     | 3,488,894           | 10,261                  | 0                             | 41,596            | 0            | 0            | 2           | 6             |
| 2010 | NATIONAL PETROLEUM COUNCIL                                                                  | 530182304 | 4,171,861     | 4,163,783           | 656                     | 0                             | 7,422             | 0            | 0            | 2           | 6             |
| 2003 | NATIONAL RURAL ELECTRIC COOPERATIVE ASSOCIATION                                             | 530116145 | 141,478,307   | 0                   | 61,946,911              | 20,956,913                    | 294,209           | 58,280,274   | 0            | 2           | 6             |
| 2004 | NATIONAL RURAL ELECTRIC COOPERATIVE ASSOCIATION                                             | 530116145 | 97,921,556    | 0                   | 65,690,028              | 22,502,614                    | 841,975           | 8,886,939    | 0            | 2           | 6             |
| 2005 | NATIONAL RURAL ELECTRIC COOPERATIVE ASSOCIATION                                             | 530116145 | 102,357,341   | 0                   | 69,711,659              | 23,581,598                    | 906,627           | 8,157,457    | 0            | 2           | 6             |
| 2006 | NATIONAL RURAL ELECTRIC COOPERATIVE ASSOCIATION                                             | 530116145 | 111,872,548   | 500,000             | 77,736,144              | 24,943,758                    | 1,151,926         | 7,540,720    | 0            | 2           | 6             |
| 2007 | NATIONAL RURAL ELECTRIC COOPERATIVE ASSOCIATION                                             | 530116145 | 117,225,467   | 500,000             | 78,951,834              | 26,158,869                    | 963,273           | 10,651,491   | 0            | 2           | 6             |
| 2008 | NATIONAL RURAL ELECTRIC COOPERATIVE ASSOCIATION                                             | 530116145 | 127,969,386   | 500,000             | 52,792,386              | 26,368,148                    | 346,552           | 12,611,377   | 0            | 2           | 6             |
| 2009 | NATIONAL RURAL ELECTRIC COOPERATIVE ASSOCIATION                                             | 530116145 | 134,593,819   | 250,000             | 52,792,965              | 27,029,432                    | 129,109           | 13,346,764   | 0            | 2           | 6             |
| 2010 | NATIONAL RURAL ELECTRIC COOPERATIVE ASSOCIATION                                             | 530116145 | 142,748,636   | 250,000             | 88,143,309              | 27,732,379                    | 36,407            | 13,572,205   | 0            | 2           | 6             |

| Year | Name                                   | EIN       | Total Revenue | Total Contributions | Program Service Revenue | Membership Dues & Assessments | Investment Income | Other Income | Grant Income | Focus Level | 501 C Subcode |
|------|----------------------------------------|-----------|---------------|---------------------|-------------------------|-------------------------------|-------------------|--------------|--------------|-------------|---------------|
| 2003 | NATIONAL TAXPAYERS UNION               | 521009116 | 0             | 0                   | 0                       | 0                             | 0                 | 0            | 41,000       | 2           | 4             |
| 2004 | NATIONAL TAXPAYERS UNION               | 521009116 | 1,993,530     | 1,965,330           |                         | 0                             | 22,793            | 0            | 2,000        | 2           | 4             |
| 2005 | NATIONAL TAXPAYERS UNION               | 521009116 | 2,233,045     | 2,207,839           |                         | 0                             | 140               | 19,432       | 15,000       | 2           | 4             |
| 2006 | NATIONAL TAXPAYERS UNION               | 521009116 | 5,017,251     | 4,910,180           |                         | 0                             | 44                | 58,263       | 10,000       | 2           | 4             |
| 2007 | NATIONAL TAXPAYERS UNION               | 521009116 | 2,996,560     | 2,769,958           |                         | 0                             | 16,432            | 210,170      | 10,000       | 2           | 4             |
| 2008 | NATIONAL TAXPAYERS UNION               | 521009116 | 2,701,269     | 2,602,884           |                         | 0                             | 6,458             | 91,927       | 10,000       | 2           | 4             |
| 2009 | NATIONAL TAXPAYERS UNION               | 521009116 | 2,409,400     | 2,260,934           |                         | 0                             | 11,774            | 136,692      | 10,000       | 2           | 4             |
| 2010 | NATIONAL TAXPAYERS UNION               | 521009116 | 3,193,961     | 1,351,716           |                         | 0                             | 1,805,000         | 37,245       | 75,000       | 2           | 4             |
| 2003 | NATIONAL TAXPAYERS UNION FOUNDATION    | 521122683 | 1,031,513     | 1,028,504           | 0                       | 0                             | 3,009             | 0            | 150,000      | 2           | 3             |
| 2004 | NATIONAL TAXPAYERS UNION FOUNDATION    | 521122683 | 1,820,248     | 1,817,942           | 0                       | 0                             | 2,306             | 0            | 186,000      | 2           | 3             |
| 2005 | NATIONAL TAXPAYERS UNION FOUNDATION    | 521122683 | 4,394,740     | 4,393,100           |                         | 0                             | 524               | 0            | 192,000      | 2           | 3             |
| 2006 | NATIONAL TAXPAYERS UNION FOUNDATION    | 521122683 | 1,237,236     | 1,197,922           | 0                       | 0                             | 39,314            | 0            | 203,500      | 2           | 3             |
| 2007 | NATIONAL TAXPAYERS UNION FOUNDATION    | 521122683 | 2,216,106     | 2,190,781           |                         | 0                             | 12,951            | 0            | 752,250      | 2           | 3             |
| 2008 | NATIONAL TAXPAYERS UNION FOUNDATION    | 521122683 | 1,095,497     | 1,089,373           | 0                       | 0                             | 6,124             | 0            | 166,600      | 2           | 3             |
| 2009 | NATIONAL TAXPAYERS UNION FOUNDATION    | 521122683 | 587,523       | 583,379             |                         | 0                             | 4,144             | 0            | 143,000      | 2           | 3             |
| 2010 | NATIONAL TAXPAYERS UNION FOUNDATION    | 521122683 | 468,976       | 468,023             |                         | 0                             | 953               | 0            | 57,600       | 2           | 3             |
| 2003 | OKLAHOMA COUNCIL OF PUBLIC AFFAIRS INC | 731436375 | 866,778       | 834,813             | 0                       | 0                             | 28,012            | 3,953        | 0            | 2           | 3             |
| 2004 | OKLAHOMA COUNCIL OF PUBLIC AFFAIRS INC | 731436375 | 1,174,956     | 1,148,074           | 0                       | 0                             | 18,492            | 8,390        | 350,000      | 2           | 3             |
| 2005 | OKLAHOMA COUNCIL OF PUBLIC AFFAIRS INC | 731436375 | 1,196,952     | 1,183,523           | 0                       | 0                             | 6,211             | 7,218        | 625,000      | 2           | 3             |
| 2006 | OKLAHOMA COUNCIL OF PUBLIC AFFAIRS INC | 731436375 | 1,213,289     | 1,199,191           | 0                       | 0                             | 13,798            | 300          | 45,000       | 2           | 3             |

| Year | Name                                         | EIN       | Total Revenue | Total Contributions | Program Service Revenue | Membership Dues & Assessments | Investment Income | Other Income | Grant Income | Focus Level | 501 C Subcode |
|------|----------------------------------------------|-----------|---------------|---------------------|-------------------------|-------------------------------|-------------------|--------------|--------------|-------------|---------------|
| 2007 | OKLAHOMA COUNCIL OF PUBLIC AFFAIRS INC       | 731436375 | 1,156,646     | 1,121,104           | 0                       | 0                             | 19,379            | 16,163       | 30,000       | 2           | 3             |
| 2008 | OKLAHOMA COUNCIL OF PUBLIC AFFAIRS INC       | 731436375 | 1,482,107     | 1,442,222           | 0                       | 0                             | 16,193            | 23,692       | 400,000      | 2           | 3             |
| 2009 | OKLAHOMA COUNCIL OF PUBLIC AFFAIRS INC       | 731436375 | 1,062,784     | 1,043,010           | 0                       | 0                             | 2,974             | 16,800       | 45,000       | 2           | 3             |
| 2010 | OKLAHOMA COUNCIL OF PUBLIC AFFAIRS INC       | 731436375 | 1,385,424     | 1,399,790           | 0                       | 0                             | 1,807             | -16,173      | 25,000       | 2           | 3             |
| 2003 | OREGON INSTITUTE OF SCIENCE AND MEDICINE     | 930814898 | 290,300       | 252,226             | 0                       | 0                             | 336               | 37,738       | 0            | 2           | 3             |
| 2004 | OREGON INSTITUTE OF SCIENCE AND MEDICINE     | 930814898 | 464,147       | 394,844             | 0                       | 0                             | 930               | 68,373       | 0            | 2           | 3             |
| 2005 | OREGON INSTITUTE OF SCIENCE AND MEDICINE     | 930814898 | 1,008,151     | 992,037             | 0                       | 0                             | 2,867             | 13,247       | 160,000      | 2           | 3             |
| 2006 | OREGON INSTITUTE OF SCIENCE AND MEDICINE     | 930814898 | 914,435       | 874,699             | 12,778                  | 0                             | 14,301            | 12,657       | 350,000      | 2           | 3             |
| 2007 | OREGON INSTITUTE OF SCIENCE AND MEDICINE     | 930814898 | 790,251       | 728,604             | 13,500                  | 0                             | 12,321            | 35,826       | 100,000      | 2           | 3             |
| 2008 | OREGON INSTITUTE OF SCIENCE AND MEDICINE     | 930814898 | 585,035       | 523,520             | 26,750                  | 0                             | 12,138            | 22,627       | 100,000      | 2           | 3             |
| 2009 | OREGON INSTITUTE OF SCIENCE AND MEDICINE     | 930814898 | 489,226       | 429,424             | 14,700                  | 0                             | 19,839            | 25,263       | 100,000      | 2           | 3             |
| 2010 | OREGON INSTITUTE OF SCIENCE AND MEDICINE     | 930814898 | 435,808       | 415,445             | 0                       | 0                             | 3,221             | 7,142        | 200,000      | 2           | 3             |
| 2003 | PACIFIC RESEARCH INSTITUTE FOR PUBLIC POLICY | 942528433 | 4,019,277     | 3,936,675           | 31,961                  | 0                             | 52,392            | -1,751       | 1,201,500    | 2           | 3             |
| 2004 | PACIFIC RESEARCH INSTITUTE FOR PUBLIC POLICY | 942528433 | 3,636,105     | 3,412,862           | 30,111                  | 0                             | 108,535           | 84,597       | 1,242,470    | 2           | 3             |
| 2005 | PACIFIC RESEARCH INSTITUTE FOR PUBLIC POLICY | 942528433 | 4,918,277     | 4,761,144           | 27,062                  | 0                             | 69,892            | 60,179       | 1,084,000    | 2           | 3             |
| 2006 | PACIFIC RESEARCH INSTITUTE FOR PUBLIC POLICY | 942528433 | 3,698,354     | 3,527,183           | 17,784                  | 0                             | 113,882           | 39,505       | 1,341,500    | 2           | 3             |
| 2007 | PACIFIC RESEARCH INSTITUTE FOR PUBLIC POLICY | 942528433 | 6,787,681     | 6,599,592           | 20,944                  | 0                             | 116,342           | 50,803       | 1,626,500    | 2           | 3             |
| 2008 | PACIFIC RESEARCH INSTITUTE FOR PUBLIC POLICY | 942528433 | 4,001,628     | 3,842,590           | 10,040                  | 0                             | 96,538            | 52,460       | 1,499,751    | 2           | 3             |
| 2009 | PACIFIC RESEARCH INSTITUTE FOR PUBLIC POLICY | 942528433 | 4,707,728     | 3,860,551           | 7,278                   | 0                             | 36,270            | 19,024       | 1,806,750    | 2           | 3             |
| 2010 | PACIFIC RESEARCH INSTITUTE FOR PUBLIC POLICY | 942528433 | 3,923,123     | 3,860,551           | 7,278                   | 0                             | 37,527            | 11,840       | 1,635,500    | 2           | 3             |

| Year | Name                                   | EIN       | Total Revenue | Total Contributions | Program Service Revenue | Membership Dues & Assessments | Investment Income | Other Income | Grant Income | Focus Level | 501 C Subcode |
|------|----------------------------------------|-----------|---------------|---------------------|-------------------------|-------------------------------|-------------------|--------------|--------------|-------------|---------------|
| 2009 | PLANTS NEED CO2 ORG                    | 270383509 | 547,600       | 547,600             | 0                       | 0                             | 0                 | 0            | 0            | 1           | 3             |
| 2010 | PLANTS NEED CO2 ORG                    | 270383509 | 17,670        | 17,670              |                         | 0                             | 0                 | 0            | 0            | 1           | 3             |
| 2003 | REASON FOUNDATION                      | 953298239 | 5,709,610     | 4,902,209           | 786,567                 | 0                             | 20,834            | 0            | 1,062,500    | 2           | 3             |
| 2004 | REASON FOUNDATION                      | 953298239 | 4,672,173     | 3,927,547           | 743,380                 | 0                             | 1,246             | 0            | 1,542,350    | 2           | 3             |
| 2005 | REASON FOUNDATION                      | 953298239 | 5,194,247     | 4,449,928           | 731,197                 | 0                             | 13,122            | 0            | 1,615,180    | 2           | 3             |
| 2006 | REASON FOUNDATION                      | 953298239 | 7,345,596     | 6,561,878           | 675,375                 | 0                             | 108,343           | 0            | 1,777,000    | 2           | 3             |
| 2007 | REASON FOUNDATION                      | 953298239 | 7,793,649     | 6,855,241           | 730,185                 | 0                             | 245,067           | -36,844      | 1,787,250    | 2           | 3             |
| 2008 | REASON FOUNDATION                      | 953298239 | 7,146,205     | 6,267,769           | 754,668                 | 0                             | 117,733           | 6,035        | 2,264,500    | 2           | 3             |
| 2009 | REASON FOUNDATION                      | 953298239 | 6,915,071     | 6,093,799           | 779,086                 | 0                             | 78,392            | -36,206      | 2,517,548    | 2           | 3             |
| 2010 | REASON FOUNDATION                      | 953298239 | 7,196,010     | 6,399,733           | 768,335                 | 0                             | 50,137            | -22,195      | 2,433,274    | 2           | 3             |
| 2006 | RESPONSIBLE RESOURCES                  | 205948640 | 507,431       | 500,000             | 0                       | 0                             | 7,431             | 0            | 0            | 1           | 3             |
| 2007 | RESPONSIBLE RESOURCES                  | 205948640 | 1,138,655     | 1,125,000           | 0                       | 0                             | 13,655            | 0            | 1,000,000    | 1           | 3             |
| 2008 | RESPONSIBLE RESOURCES                  | 205948640 | 10,274        |                     |                         | 0                             | 3,025             | 7,249        | 0            | 1           | 3             |
| 2003 | SCIENCE & ENVIRONMENTAL POLICY PROJECT | 541645372 | 160,249       | 27,240              | 122,000                 | 0                             | 11,009            | 0            | 5,000        | 1           | 3             |
| 2004 | SCIENCE & ENVIRONMENTAL POLICY PROJECT | 541645372 | 137,683       | 53,208              | 41,511                  | 0                             | 42,964            | 0            | 5,000        | 1           | 3             |
| 2005 | SCIENCE & ENVIRONMENTAL POLICY PROJECT | 541645372 | 184,365       | 102,260             | 14,700                  | 0                             | 67,405            | 0            | 0            | 1           | 3             |
| 2006 | SCIENCE & ENVIRONMENTAL POLICY PROJECT | 541645372 | 425,704       | 74,810              | 0                       | 0                             | 18,677            | 332,217      | 0            | 1           | 3             |
| 2007 | SCIENCE & ENVIRONMENTAL POLICY PROJECT | 541645372 | 569,580       | 174,600             | 143,000                 | 0                             | 251,980           | 0            | 5,000        | 1           | 3             |
| 2008 | SCIENCE & ENVIRONMENTAL POLICY PROJECT | 541645372 | -423,268      | 166,930             | 31,750                  | 0                             | -654,974          | 32,986       | 0            | 1           | 3             |
| 2009 | SCIENCE & ENVIRONMENTAL POLICY PROJECT | 541645372 | 626,779       | 123,300             | 26,350                  | 0                             | 461,618           | 4,972        | 10,000       | 1           | 3             |



| Year | Name                                   | EIN       | Total Revenue | Total Contributions | Program Service Revenue | Membership Dues & Assessments | Investment Income | Other Income | Grant Income | Focus Level | 501 C Subcode |
|------|----------------------------------------|-----------|---------------|---------------------|-------------------------|-------------------------------|-------------------|--------------|--------------|-------------|---------------|
| 2010 | SCIENCE & ENVIRONMENTAL POLICY PROJECT | 541645372 | 251,584       | 59,286              | 50,000                  | 0                             | 137,057           | 800          | 0            | 1           | 3             |
| 2003 | SOUTHEASTERN LEGAL FOUNDATION INC      | 581247027 | 1,500,054     | 1,440,798           | 0                       | 0                             | 14,243            | 45,013       | 21,000       | 2           | 3             |
| 2004 | SOUTHEASTERN LEGAL FOUNDATION INC      | 581247027 | 939,160       | 766,114             |                         | 0                             | 26,378            | 146,668      | 363,000      | 2           | 3             |
| 2005 | SOUTHEASTERN LEGAL FOUNDATION INC      | 581247027 | 1,225,372     | 1,199,996           | 0                       | 0                             | 39,845            | -14,469      | 351,000      | 2           | 3             |
| 2006 | SOUTHEASTERN LEGAL FOUNDATION INC      | 581247027 | 1,783,381     | 1,684,601           | 0                       | 0                             | 98,780            | 0            | 406,000      | 2           | 3             |
| 2007 | SOUTHEASTERN LEGAL FOUNDATION INC      | 581247027 | 1,921,494     | 1,894,589           | 0                       | 0                             | 26,905            | 0            | 226,000      | 2           | 3             |
| 2008 | SOUTHEASTERN LEGAL FOUNDATION INC      | 581247027 | 2,390,801     | 2,354,746           | 0                       | 0                             | 49,818            | -13,763      | 200,000      | 2           | 3             |
| 2009 | SOUTHEASTERN LEGAL FOUNDATION INC      | 581247027 | 3,528,655     | 3,544,262           | 0                       | 0                             | -13,043           | -2,564       | 400,000      | 2           | 3             |
| 2010 | SOUTHEASTERN LEGAL FOUNDATION INC      | 581247027 | 2,267,850     | 2,221,035           |                         | 0                             | 46,815            | 0            | 205,000      | 2           | 3             |
| 2003 | SOVEREIGNTY INTERNATIONAL INC          | 10511666  | 309,067       | 309,067             | 0                       | 0                             | 0                 | 0            | 0            | 2           | 3             |
| 2004 | SOVEREIGNTY INTERNATIONAL INC          | 10511666  | 284,141       | 284,141             | 0                       | 0                             | 0                 | 0            | 0            | 2           | 3             |
| 2005 | SOVEREIGNTY INTERNATIONAL INC          | 10511666  | 190,048       | 127,178             | 62,870                  | 0                             | 0                 | 0            | 0            | 2           | 3             |
| 2006 | SOVEREIGNTY INTERNATIONAL INC          | 10511666  | 62,283        | 57,773              | 4,510                   | 0                             | 0                 | 0            | 0            | 2           | 3             |
| 2007 | SOVEREIGNTY INTERNATIONAL INC          | 10511666  | 164,126       | 164,126             | 0                       | 0                             | 0                 | 0            | 0            | 2           | 3             |
| 2008 | SOVEREIGNTY INTERNATIONAL INC          | 10511666  | 130,721       | 130,721             | 0                       | 0                             | 0                 | 0            | 0            | 2           | 3             |
| 2009 | SOVEREIGNTY INTERNATIONAL INC          | 10511666  | 33,336        | 33,336              | 0                       | 0                             | 0                 | 0            | 0            | 2           | 3             |
| 2010 | SOVEREIGNTY INTERNATIONAL INC          | 10511666  | 69,003        | 68,056              |                         | 0                             | 0                 | 0            | 0            | 2           | 3             |
| 2003 | STATE POLICY NETWORK                   | 570952531 | 689,747       | 681,852             | 4,990                   | 0                             | 2,905             | 0            | 211,000      | 2           | 3             |
| 2004 | STATE POLICY NETWORK                   | 570952531 | 699,635       | 685,322             | 9,271                   | 0                             | 5,042             | 0            | 262,110      | 2           | 3             |
| 2005 | STATE POLICY NETWORK                   | 570952531 | 1,002,092     | 972,162             | 7,900                   | 0                             | 15,889            | 6,141        | 259,500      | 2           | 3             |

| Year | Name                                         | EIN       | Total Revenue | Total Contributions | Program Service Revenue | Membership Dues & Assessments | Investment Income | Other Income | Grant Income | Focus Level | 501 C Subcode |
|------|----------------------------------------------|-----------|---------------|---------------------|-------------------------|-------------------------------|-------------------|--------------|--------------|-------------|---------------|
| 2006 | STATE POLICY NETWORK                         | 570952531 | 1,281,303     | 1,235,784           | 5,182                   | 0                             | 40,337            | 0            | 633,700      | 2           | 3             |
| 2007 | STATE POLICY NETWORK                         | 570952531 | 2,632,137     | 2,562,853           | 4,885                   | 0                             | 54,399            | 10,000       | 2,113,600    | 2           | 3             |
| 2008 | STATE POLICY NETWORK                         | 570952531 | 4,083,058     | 3,980,169           | 4,025                   | 0                             | 48,195            | 50,669       | 2,173,250    | 2           | 3             |
| 2009 | STATE POLICY NETWORK                         | 570952531 | 4,480,054     | 4,260,367           | 11,300                  | 0                             | 40,662            | 167,725      | 3,280,747    | 2           | 3             |
| 2010 | STATE POLICY NETWORK                         | 570952531 | 4,812,513     | 4,705,773           | 11,505                  | 0                             | 32,417            | 62,818       | 3,091,070    | 2           | 3             |
| 2003 | TEXAS PUBLIC POLICY FOUNDATION               | 742524057 | 1,013,375     | 649,597             | 363,777                 | 0                             | 1                 | 0            | 245,000      | 2           | 3             |
| 2004 | TEXAS PUBLIC POLICY FOUNDATION               | 742524057 | 1,268,923     | 602,463             | 664,941                 | 0                             | 870               | 649          | 268,294      | 2           | 3             |
| 2005 | TEXAS PUBLIC POLICY FOUNDATION               | 742524057 | 1,801,552     | 866,874             | 926,331                 | 0                             | 8,052             | 295          | 560,892      | 2           | 3             |
| 2006 | TEXAS PUBLIC POLICY FOUNDATION               | 742524057 | 1,924,407     | 777,698             | 1,101,758               | 0                             | 41,072            | 3,879        | 434,420      | 2           | 3             |
| 2007 | TEXAS PUBLIC POLICY FOUNDATION               | 742524057 | 2,522,968     | 2,018,903           | 419,292                 | 0                             | 84,773            | 0            | 633,500      | 2           | 3             |
| 2008 | TEXAS PUBLIC POLICY FOUNDATION               | 742524057 | 3,522,429     | 3,103,623           | 371,074                 | 0                             | 47,732            | 0            | 817,000      | 2           | 3             |
| 2009 | TEXAS PUBLIC POLICY FOUNDATION               | 742524057 | 3,223,804     | 2,683,969           | 504,994                 | 0                             | 34,841            | 0            | 1,272,000    | 2           | 3             |
| 2010 | TEXAS PUBLIC POLICY FOUNDATION               | 742524057 | 4,674,836     | 4,099,459           | 415,596                 | 0                             | 7,853             | 151,928      | 1,103,003    | 2           | 3             |
| 2003 | THOMAS JEFFERSON INSTITUTE FOR PUBLIC POLICY | 510280185 | 288,825       | 269,720             | 0                       | 0                             | 266               | 18,839       | 29,000       | 2           | 3             |
| 2004 | THOMAS JEFFERSON INSTITUTE FOR PUBLIC POLICY | 510280185 | 226,997       | 226,470             | 0                       | 0                             | 80                | 447          | 25,000       | 2           | 3             |
| 2005 | THOMAS JEFFERSON INSTITUTE FOR PUBLIC POLICY | 510280185 | 221,399       | 218,216             | 0                       | 0                             | 227               | 2,956        | 59,000       | 2           | 3             |
| 2006 | THOMAS JEFFERSON INSTITUTE FOR PUBLIC POLICY | 510280185 | 255,552       | 255,271             | 0                       | 0                             | 281               | 0            | 39,000       | 2           | 3             |
| 2007 | THOMAS JEFFERSON INSTITUTE FOR PUBLIC POLICY | 510280185 | 212,847       | 213,026             | 0                       | 0                             | 115               | -294         | 8,500        | 2           | 3             |
| 2008 | THOMAS JEFFERSON INSTITUTE FOR PUBLIC POLICY | 510280185 | 314,512       | 316,434             | 0                       | 0                             | -3,127            | 1,205        | 78,500       | 2           | 3             |
| 2009 | THOMAS JEFFERSON INSTITUTE FOR PUBLIC POLICY | 510280185 | 224,363       | 223,487             | 0                       | 0                             | 876               | 0            | 170,450      | 2           | 3             |

| Year | Name                                                     | EIN       | Total Revenue | Total Contributions | Program Service Revenue | Membership Dues & Assessments | Investment Income | Other Income | Grant Income | Focus Level | 501 C Subcode |
|------|----------------------------------------------------------|-----------|---------------|---------------------|-------------------------|-------------------------------|-------------------|--------------|--------------|-------------|---------------|
| 2010 | THOMAS JEFFERSON INSTITUTE FOR PUBLIC POLICY             | 510280185 | 306,376       | 305,472             | 0                       | 0                             | 768               | 136          | 109,000      | 2           | 3             |
| 2009 | TS AUGUST/THE SECOND OF AUGUST                           | 300081223 | 3,865         | 3,796               |                         | 0                             | 0                 | 69           |              | 2           | 3             |
| 2010 | TS AUGUST/THE SECOND OF AUGUST                           | 300081223 | 2,833         | 2,700               |                         | 0                             | 0                 | 133          |              | 2           | 3             |
| 2003 | WASHINGTON POLICY CENTER/WASHINGTON INSTITUTE FOUNDATION | 911752769 | 665,533       | 495,251             | 126,027                 | 0                             | 1,124             | 43,131       | 30,000       | 2           | 3             |
| 2004 | WASHINGTON POLICY CENTER/WASHINGTON INSTITUTE FOUNDATION | 911752769 | 739,919       | 471,383             | 229,203                 | 0                             | 2,760             | 36,573       | 47,000       | 2           | 3             |
| 2005 | WASHINGTON POLICY CENTER/WASHINGTON INSTITUTE FOUNDATION | 911752769 | 1,957,098     | 1,768,876           | 259,852                 | 0                             | 3,518             | -75,148      | 67,000       | 2           | 3             |
| 2006 | WASHINGTON POLICY CENTER/WASHINGTON INSTITUTE FOUNDATION | 911752769 | 1,395,269     | 1,395,131           | 43,783                  | 0                             | 49,346            | -92,991      | 42,000       | 2           | 3             |
| 2007 | WASHINGTON POLICY CENTER/WASHINGTON INSTITUTE FOUNDATION | 911752769 | 2,654,343     | 2,630,762           | 89,158                  | 0                             | 57,442            | -123,019     | 232,500      | 2           | 3             |
| 2008 | WASHINGTON POLICY CENTER/WASHINGTON INSTITUTE FOUNDATION | 911752769 | 1,207,542     | 1,271,671           | 104,298                 | 0                             | -49,055           | -119,372     | 142,700      | 2           | 3             |
| 2009 | WASHINGTON POLICY CENTER/WASHINGTON INSTITUTE FOUNDATION | 911752769 | 1,149,317     | 1,146,993           | 101,730                 | 0                             | 37,659            | -137,065     | 242,500      | 2           | 3             |
| 2010 | WASHINGTON POLICY CENTER/WASHINGTON INSTITUTE FOUNDATION | 911752769 | 1,500,932     | 1,420,494           | 123,851                 | 0                             | 72,068            | -115,481     | x            | 2           | 3             |

**S-5 U.S. National Climate Change Counter-movement Income Distribution 2003 – 2010**

| Name                                                                        | Total Revenue | Total Contributions | Grant Income | Contributions - Source Unknown | % Income - Source Unknown | % Income Grants |
|-----------------------------------------------------------------------------|---------------|---------------------|--------------|--------------------------------|---------------------------|-----------------|
| 60-Plus Association Inc                                                     | 36,598,331    | 36,210,639          | 203,000      | 36,007,639                     | 98.4%                     | 0.6%            |
| Advancement Of Sound Science Center Inc. The (TASSC)                        | 104,782       | 104,782             | 0            | 104,782                        | 100.0%                    | 0.0%            |
| American Coal Foundation                                                    | 2,156,405     | 2,036,777           | 0            | 2,036,777                      | 94.5%                     | 0.0%            |
| American Coalition For Clean Coal Electricity/Center For Energy And Economy | 178,451,685   | 121,318,168         | 0            | 121,318,168                    | 68.0%                     | 0.0%            |
| American Conservative Union Foundation                                      | 8,679,839     | 6,820,963           | 615,250      | 6,205,713                      | 71.5%                     | 7.1%            |
| American Council For Capital Formation                                      | 10,062,043    | 9,941,477           | 485,000      | 9,456,477                      | 94.0%                     | 4.8%            |
| American Council For Capital Formation Center For Policy Research           | 6,936,766     | 6,895,472           | 1,195,000    | 5,700,472                      | 82.2%                     | 17.2%           |
| American Energy Alliance                                                    | 6,200,922     | 6,186,128           | 0            | 6,186,128                      | 99.8%                     | 0.0%            |
| American Energy Freedom Center                                              | 121,187       | 121,160             | 0            | 121,160                        | 100.0%                    | 0.0%            |
| American Enterprise Institute For Public Policy Research                    | 264,100,294   | 246,202,382         | 88,709,171   | 157,493,211                    | 59.6%                     | 33.6%           |
| American Farm Bureau Federation                                             | 213,024,055   | 0                   | 0            | 0                              | 0.0%                      | 0.0%            |
| American Friends Of The Institute Of Economic Affairs                       | 3,435,618     | 3,435,618           | 329,050      | 3,106,568                      | 90.4%                     | 9.6%            |
| American Gas Association                                                    | 191,039,116   | 0                   | 0            | 0                              | 0.0%                      | 0.0%            |
| American Legislative Exchange Council                                       | 53,072,881    | 43,388,761          | 3,703,358    | 39,685,403                     | 74.8%                     | 7.0%            |
| American Natural Gas Alliance Inc                                           | 155258443     | 0                   | 0            | 0                              | 0.0%                      | 0.0%            |
| American Petroleum Institute                                                | 1,187,189,385 | 0                   | 0            | 0                              | 0.0%                      | 0.0%            |
| American Policy Center                                                      | 7,324,569     | 7,144,956           | 0            | 7,144,956                      | 97.5%                     | 0.0%            |
| American Tradition Institute                                                | 186,000       | 186,000             | 0            | 186,000                        | 100.0%                    | 0.0%            |
| Americans For Balanced Energy Choices                                       | 48,184,564    | 47,661,930          | 0            | 47,661,930                     | 98.9%                     | 0.0%            |
| Americans For Prosperity                                                    | 54,101,624    | 53,448,074          | 22,368,592   | 31,079,482                     | 57.4%                     | 41.3%           |
| Annapolis Center For Science-Based Public Policy Inc                        | 2,723,364     | 2,579,325           | 418,000      | 2,161,325                      | 79.4%                     | 15.3%           |
| Association Of Global Automobile Manufacturers Inc                          | 41,700,960    | 0                   | 0            | 0                              | 0.0%                      | 0.0%            |
| Atlas Economic Research Foundation Atlas                                    | 41,101,151    | 39,962,898          | 24,616,543   | 15,346,355                     | 37.3%                     | 59.9%           |
| Capital Research Center                                                     | 15,387,372    | 12,546,018          | 4,429,200    | 8,116,818                      | 52.7%                     | 28.8%           |
| Cascade Policy Institute                                                    | 5,580,354     | 5,465,045           | 2,433,468    | 3,031,577                      | 54.3%                     | 43.6%           |
| Cato Institute                                                              | 186,342,804   | 160,874,345         | 30,686,557   | 130,187,788                    | 69.9%                     | 16.5%           |
| Center For Defense Of Free Enterprise                                       | 553,479       | 514,922             | 235,000      | 279,922                        | 50.6%                     | 42.5%           |
| Center For The Study Of Carbon Dioxide And Global Change                    | 5,303,351     | 5,174,481           | 508,800      | 4,665,681                      | 88.0%                     | 9.6%            |
| Chamber Of Commerce Of The United States Of America                         | 1,106,603,141 | 1,018,926,237       | 186,500      | 1,018,739,737                  | 92.1%                     | 0.0%            |
| Citizens For Affordable Energy Inc                                          | 602,841       | 602,787             | 0            | 602,787                        | 100.0%                    | 0.0%            |
| CO2 Is Green Inc                                                            | 1,107,800     | 1,107,800           | 0            | 1,107,800                      | 100.0%                    | 0.0%            |
| Coalition For American Jobs                                                 | 2,600,000     | 2,600,000           | 0            | 2,600,000                      | 100.0%                    | 0.0%            |
| Coalition For Vehicle Choice Inc                                            | 66518         | 0                   | 0            | 0                              | 0.0%                      | 0.0%            |
| Collegians For A Constructive Tomorrow-Upper Midwest                        | 1,344,240     | 1,335,297           | 0            | 1,335,297                      | 99.3%                     | 0.0%            |
| Committee For A Constructive Tomorrow                                       | 10,310,559    | 10,279,041          | 4,671,448    | 5,607,593                      | 54.4%                     | 45.3%           |
| Competitive Enterprise Institute                                            | 30,790,607    | 30,370,623          | 12,544,458   | 17,826,165                     | 57.9%                     | 40.7%           |
| Congress Of Racial Equality                                                 | 5,792,288     | 5,769,995           | 233,560      | 5,536,435                      | 95.6%                     | 4.0%            |
| Consumer Alert Inc                                                          | 397,494       | 374,685             | 146,000      | 228,685                        | 57.5%                     | 36.7%           |
| Consumer Energy Alliance Inc                                                | 1,403,971     | 1,403,722           | 132,500      | 1,271,222                      | 90.5%                     | 9.4%            |

| Name                                                                                           | Total Revenue | Total Contributions | Grant Income | Contributions - Source Unknown | % Income - Source Unknown | % Income Grants |
|------------------------------------------------------------------------------------------------|---------------|---------------------|--------------|--------------------------------|---------------------------|-----------------|
| Edison Electric Institute                                                                      | 581,725,894   | 0                   | 0            | 0                              | 0.0%                      | 0.0%            |
| Energy Makes America Great                                                                     | 15,600        | 15,600              | 0            | 15,600                         | 100.0%                    | 0.0%            |
| Environmental Literacy Council                                                                 | 2,742,068     | 2,259,023           | 1,022,516    | 1,236,507                      | 45.1%                     | 37.3%           |
| Federation For American Coal, Energy And Security                                              | 3,405,722     | 3,405,722           | 0            | 3,405,722                      | 100.0%                    | 0.0%            |
| Free Enterprise Action Institute/Free Enterprise Education Institute                           | 1,469,581     | 1,461,405           | 807,687      | 653,718                        | 44.5%                     | 55.0%           |
| Freedom Action                                                                                 | 336,178       | 336,082             | 0            | 336,082                        | 100.0%                    | 0.0%            |
| Freedomworks Foundation/Cse Freedom Works Foundation                                           | 27,574,769    | 26,427,454          | 5,337,000    | 21,090,454                     | 76.5%                     | 19.4%           |
| Freedomworks Inc./ Citizens For A Sound Economy                                                | 33,700,202    | 32,275,554          | 979,000      | 31,296,554                     | 92.9%                     | 2.9%            |
| Frontiers Of Freedom Institute Inc                                                             | 3,392,670     | 3,108,525           | 50,000       | 3,058,525                      | 90.2%                     | 1.5%            |
| George C Marshall Institute                                                                    | 5,787,190     | 5,794,662           | 4,117,070    | 1,677,592                      | 29.0%                     | 71.1%           |
| Heartland Institute                                                                            | 36,945,389    | 35,103,302          | 17,690,974   | 17,412,328                     | 47.1%                     | 47.9%           |
| Heritage Foundation                                                                            | 468,217,811   | 415,091,404         | 76,366,188   | 338,725,216                    | 72.3%                     | 16.3%           |
| Hudson Institute Inc                                                                           | 79,027,111    | 62,186,602          | 25,947,534   | 36,239,068                     | 45.9%                     | 32.8%           |
| Independence Institute                                                                         | 10,274,272    | 9,645,283           | 3,927,964    | 5,717,319                      | 55.6%                     | 38.2%           |
| Independent Institute                                                                          | 20,780,357    | 19,313,122          | 4,923,548    | 14,389,574                     | 69.2%                     | 23.7%           |
| Independent Petroleum Association Of America                                                   | 60,207,680    | 1,615,513           | 187,356      | 1,428,157                      | 2.4%                      | 0.3%            |
| Independent Womens Forum                                                                       | 14,036,679    | 11,585,275          | 7,445,007    | 4,140,268                      | 29.5%                     | 53.0%           |
| Industrial Energy Consumers Of America/International Federation Of Industrial Energy Consumers | 2,320,141     | 0                   | 0            | 0                              | 0.0%                      | 0.0%            |
| Institute For Energy Research                                                                  | 9,262,937     | 9,257,024           | 1,300,000    | 7,957,024                      | 85.9%                     | 14.0%           |
| Institute For Liberty                                                                          | 2,989,101     | 2,989,101           | 0            | 2,989,101                      | 100.0%                    | 0.0%            |
| Institute For The Study Of Earth And Man                                                       | 1,761,975     | 1,223,601           | 125,000      | 1,098,601                      | 62.4%                     | 7.1%            |
| International Policy Network                                                                   | 8,063,139     | 7,775,250           | 1,109,170    | 6,666,080                      | 82.7%                     | 13.8%           |
| James Madison Institute For Public Policy Studies Inc                                          | 6,644,048     | 6,312,902           | 2,189,041    | 4,123,861                      | 62.1%                     | 32.9%           |
| John Locke Foundation Inc                                                                      | 24,359,666    | 23,686,741          | 17,999,847   | 5,686,894                      | 23.3%                     | 73.9%           |
| Landmark Legal Foundation                                                                      | 14,300,442    | 13,438,038          | 6,953,750    | 6,484,288                      | 45.3%                     | 48.6%           |
| Manhattan Institute For Policy Research Inc                                                    | 89,537,990    | 83,585,327          | 33,113,951   | 50,471,376                     | 56.4%                     | 37.0%           |
| Media Research Center Inc                                                                      | 82,015,387    | 78,637,852          | 14,494,847   | 64,143,005                     | 78.2%                     | 17.7%           |
| Mercatus Center/Center For Market Processs Inc                                                 | 54,100,309    | 53,071,168          | 14,393,663   | 38,677,505                     | 71.5%                     | 26.6%           |
| Mountain States Legal Foundation                                                               | 20,609,399    | 19,489,520          | 869,850      | 18,619,670                     | 90.3%                     | 4.2%            |
| National Association Of Manufacturers Of The USA                                               | 256,205,825   | 43,095,539          | 1,163,650    | 41,931,889                     | 16.4%                     | 0.5%            |
| National Center For Policy Analysis                                                            | 44,865,962    | 43,244,318          | 13,936,037   | 29,308,281                     | 65.3%                     | 31.1%           |
| National Center For Public Policy Research Inc                                                 | 67,077,604    | 67,101,665          | 660,450      | 66,441,215                     | 99.1%                     | 1.0%            |
| National Mining Association                                                                    | 135,657,740   | 3,183,922           | 0            | 3,183,922                      | 2.3%                      | 0.0%            |
| National Petrochemical & Refiners Association/American Fuel And Petrochemical Manufacturers    | 81,913,747    | 0                   | 0            | 0                              | 0.0%                      | 0.0%            |
| National Petroleum Council                                                                     | 30,947,466    | 30,640,471          | 0            | 30,640,471                     | 99.0%                     | 0.0%            |
| National Rural Electric Cooperative Association                                                | 976,167,060   | 2,000,000           | 0            | 2,000,000                      | 0.2%                      | 0.0%            |
| National Taxpayers Union                                                                       | 20,545,016    | 18,068,841          | 173,000      | 17,895,841                     | 87.1%                     | 0.8%            |
| National Taxpayers Union Foundation                                                            | 12,851,839    | 12,769,024          | 1,850,950    | 10,918,074                     | 85.0%                     | 14.4%           |
| Oklahoma Council Of Public Affairs Inc                                                         | 9,538,936     | 9,371,727           | 1,520,000    | 7,851,727                      | 82.3%                     | 15.9%           |
| Oregon Institute Of Science And Medicine                                                       | 4,977,353     | 4,610,799           | 1,010,000    | 3,600,799                      | 72.3%                     | 20.3%           |
| Pacific Research Institute For Public Policy                                                   | 35,692,173    | 33,801,148          | 11,437,971   | 22,363,177                     | 62.7%                     | 32.0%           |

| Name                                                     | Total Revenue | Total Contributions | Grant Income | Contributions - Source Unknown | % Income - Source Unknown | % Income Grants |
|----------------------------------------------------------|---------------|---------------------|--------------|--------------------------------|---------------------------|-----------------|
| Plants Need CO2 Org                                      | 565,270       | 565,270             | 0            | 565,270                        | 100.0%                    | 0.0%            |
| Reason Foundation                                        | 51,972,561    | 45,458,104          | 14,999,602   | 30,458,502                     | 58.6%                     | 28.9%           |
| Responsible Resources                                    | 1,656,360     | 1,625,000           | 1,000,000    | 625,000                        | 37.7%                     | 60.4%           |
| Science & Environmental Policy Project                   | 1,932,676     | 781,634             | 25,000       | 756,634                        | 39.1%                     | 1.3%            |
| Southeastern Legal Foundation Inc                        | 15,556,767    | 15,106,141          | 2,172,000    | 12,934,141                     | 83.1%                     | 14.0%           |
| Sovereignty International Inc                            | 1,242,725     | 1,174,398           | 0            | 1,174,398                      | 94.5%                     | 0.0%            |
| State Policy Network                                     | 19,680,539    | 19,084,282          | 12,024,977   | 7,059,305                      | 35.9%                     | 61.1%           |
| Texas Public Policy Foundation                           | 19,952,294    | 14,802,586          | 5,334,109    | 9,468,477                      | 47.5%                     | 26.7%           |
| Thomas Jefferson Institute For Public Policy             | 2,050,871     | 2,028,096           | 518,450      | 1,509,646                      | 73.6%                     | 25.3%           |
| TS August/The Second Of August                           | 6,698         | 6,496               | 0            | 6,496                          | 97.0%                     | 0.0%            |
| Washington Policy Center/Washington Institute Foundation | 11,269,953    | 10,600,561          | 803,700      | 9,796,861                      | 86.9%                     | 7.1%            |

## S-6 – Foundation Funding of U.S. National Climate Counter-movement By Foundation and Year

| Foundation                                              | 2003      | 2004      | 2005      | 2006       | 2007       | 2008       | 2009       | 2010       | Total      | % of Total |
|---------------------------------------------------------|-----------|-----------|-----------|------------|------------|------------|------------|------------|------------|------------|
| Donors Trust/Donors Capital Fund                        | 1,671,000 | 2,522,690 | 3,853,487 | 4,992,550  | 10,597,561 | 15,011,742 | 19,537,168 | 20,608,269 | 78,794,467 | 14.16%     |
| Scaife Affiliated Foundations                           | 6,190,000 | 4,200,000 | 4,160,000 | 5,200,000  | 5,565,000  | 5,160,000  | 4,080,000  | 5,005,000  | 39,560,000 | 7.11%      |
| The Lynde and Harry Bradley Foundation, Inc.            | 3,019,600 | 3,451,600 | 3,776,000 | 3,451,000  | 4,306,000  | 3,391,000  | 3,593,500  | 4,610,000  | 29,598,700 | 5.32%      |
| Koch Affiliated Foundations                             | 1,212,836 | 1,469,489 | 3,459,303 | 6,597,822  | 5,392,500  | 4,253,962  | 2,469,679  | 1,469,050  | 26,324,641 | 4.73%      |
| Howard Charitable Foundation                            | .         | .         | .         | 10,000,000 | 6,000,000  | 6,000,000  | 1,250,000  | 1,500,000  | 24,750,000 | 4.45%      |
| John William Pope Foundation                            | 2,094,714 | 2,101,727 | 2,370,119 | 3,406,807  | 3,224,508  | 3,334,508  | 2,214,754  | 3,154,508  | 21,901,645 | 3.94%      |
| Searle Freedom Trust                                    | 700,000   | 690,000   | 400,000   | 1,850,000  | 3,871,000  | 4,575,000  | 4,757,000  | 4,881,500  | 21,724,500 | 3.91%      |
| John Templeton Foundation                               | 3,111,500 | 2,954,000 | 2,205,014 | 4,454,300  | 1,548,142  | 1,135,703  | 1,594,951  | 3,204,250  | 20,207,860 | 3.63%      |
| Dunn's Foundation for the Advancement of Right Thinking | 1,373,000 | 1,485,000 | 1,430,000 | 1,580,000  | 1,582,000  | 1,550,000  | 2,792,000  | 1,895,000  | 13,687,000 | 2.46%      |
| Smith Richardson Foundation, Inc.                       | 959,067   | 791,133   | 1,826,855 | 2,194,783  | 2,386,304  | 2,456,697  | 1,630,320  | 1,297,952  | 13,543,111 | 2.43%      |
| Vanguard Charitable Endowment Program                   | 500,500   | 588,640   | 1,187,680 | 1,654,450  | 2,935,050  | 2,025,750  | 2,313,850  | 1,887,200  | 13,093,120 | 2.35%      |
| The Kovner Foundation                                   | 1,677,734 | 1,299,301 | 1,300,000 | 300,000    | 300,000    | 1,300,000  | 3,300,000  | 3,300,000  | 12,777,035 | 2.30%      |
| Annenberg Foundation                                    | 500,000   | 2,000,000 | 2,100,000 | .          | .          | 3,400,000  | .          | 3,300,000  | 11,300,000 | 2.03%      |
| Lilly Endowment Inc.                                    | 2,000,000 | 1,350,000 | 1,350,000 | 1,350,000  | 1,350,000  | 950,000    | 950,000    | 950,000    | 10,250,000 | 1.84%      |
| The Richard and Helen DeVos Foundation                  | 207,500   | 705,000   | 710,000   | 810,000    | 1,215,000  | 3,215,000  | 1,465,000  | 1,700,000  | 10,027,500 | 1.80%      |
| ExxonMobil Foundation                                   | 2,347,000 | 2,157,000 | 2,113,000 | 430,000    | 71,000     | 40,000     | .          | .          | 7,158,000  | 1.29%      |
| Brady Education Foundation, Inc.                        | 6,829,000 | .         | .         | .          | .          | .          | .          | .          | 6,829,000  | 1.23%      |
| The Samuel Roberts Noble Foundation, Inc.               | .         | 5,325,000 | 650,000   | 285,000    | .          | 430,000    | .          | .          | 6,690,000  | 1.20%      |
| Coors Affiliated Foundations                            | 740,000   | 755,000   | 540,000   | 785,000    | 760,000    | 765,000    | 1,035,000  | 810,000    | 6,190,000  | 1.11%      |
| Lakeside Foundation                                     | 815,000   | 315,000   | 1,015,000 | 1,265,000  | 815,000    | 565,000    | 615,000    | 365,000    | 5,770,000  | 1.04%      |
| Herrick Foundation                                      | 500,000   | 250,000   | 2,050,000 | 550,000    | 544,050    | 500,000    | 1,000,000  | 325,000    | 5,719,050  | 1.03%      |
| Jaquelin Hume Foundation                                | 500,000   | 492,670   | 350,000   | 701,246    | 516,850    | 986,462    | 984,667    | 845,000    | 5,376,895  | 0.97%      |
| Earhart Foundation                                      | 687,512   | 763,885   | 1,302,155 | 568,500    | 658,377    | 668,820    | 357,321    | 201,689    | 5,208,259  | 0.94%      |
| Lillian S. Wells Foundation, Inc.                       | 300,000   | 950,000   | 750,000   | 500,000    | 585,000    | 1,005,164  | 555,000    | 555,000    | 5,200,164  | 0.93%      |
| Walton Family Foundation, Inc.                          | 325,000   | 281,900   | 1,394,627 | 1,056,338  | 1,584,242  | 74,000     | 159,525    | 49,000     | 4,924,632  | 0.89%      |
| William E. Simon Foundation, Inc.                       | 255,000   | 300,000   | 245,000   | 656,200    | 602,500    | 812,500    | 665,000    | 900,000    | 4,436,200  | 0.80%      |
| Bill & Melinda Gates Foundation                         | 96,000    | 115,000   | 277,575   | .          | 900,000    | .          | 2,543,649  | .          | 3,932,224  | 0.71%      |
| Susquehanna Foundation                                  | 320,000   | 491,977   | 960,000   | 672,000    | 550,000    | 464,000    | 160,500    | 305,000    | 3,923,477  | 0.71%      |
| Ewing Marion Kauffman Foundation                        | .         | 175,000   | 884,750   | 132,500    | 1,670,000  | 225,000    | 425,000    | 355,400    | 3,867,650  | 0.70%      |
| American Petroleum Institute                            | .         | .         | .         | .          | .          | 1,865,506  | 682,500    | 1,300,500  | 3,848,506  | 0.69%      |
| Mercer Family Foundation                                | .         | .         | 60,000    | 50,000     | .          | 500,000    | 1,550,000  | 1,664,000  | 3,824,000  | 0.69%      |
| The William H. Donner Foundation                        | 441,905   | 605,246   | 428,902   | 439,869    | 570,657    | 419,500    | 337,500    | 289,500    | 3,533,079  | 0.64%      |
| The Kern Family Foundation, Inc.                        | 175,000   | 110,000   | 285,000   | .          | .          | 541,523    | 1,305,002  | 1,071,912  | 3,488,437  | 0.63%      |
| Tully and Elise Friedman Fund                           | 112,000   | 214,000   | 255,000   | 300,000    | 350,000    | 650,000    | 600,000    | 650,000    | 3,131,000  | 0.56%      |
| The MeadWestvaco Foundation                             | 125,000   | 125,000   | 125,000   | 125,000    | .          | 550,000    | 550,000    | 1,500,000  | 3,100,000  | 0.56%      |
| M. J. Murdock Charitable Trust                          | .         | 345,000   | 930,000   | .          | 1,005,000  | 600,000    | .          | .          | 2,880,000  | 0.52%      |
| William K. Bowes, Jr. Foundation                        | 300,000   | 210,500   | 410,000   | 400,000    | 300,000    | 625,000    | 400,000    | 225,000    | 2,870,500  | 0.52%      |
| F. M. Kirby Foundation, Inc.                            | 307,500   | 295,500   | 300,500   | 300,500    | 542,500    | 372,500    | 317,500    | 350,000    | 2,786,500  | 0.50%      |
| The Roe Foundation                                      | 336,500   | 200,000   | 378,000   | 410,000    | 365,000    | 95,000     | 475,000    | 390,000    | 2,649,500  | 0.48%      |

| Foundation                                                          | 2003    | 2004    | 2005    | 2006    | 2007      | 2008      | 2009    | 2010      | Total     | % of Total |
|---------------------------------------------------------------------|---------|---------|---------|---------|-----------|-----------|---------|-----------|-----------|------------|
| Hatton W. Sumners Foundation for the Study & Teaching of Self-Govmt | 455,000 | 400,000 | 391,305 | 390,000 | 54,000    | 404,700   | 389,895 | .         | 2,484,900 | 0.45%      |
| Bialkin Family Foundation                                           | .       | 10,000  | 17,500  | 17,500  | 40,000    | 2,233,140 | 12,500  | 30,250    | 2,360,890 | 0.42%      |
| Alfred C. Munger Foundation                                         | 250,000 | 300,000 | 300,000 | 300,000 | 300,000   | 300,000   | 300,000 | 300,000   | 2,350,000 | 0.42%      |
| The Anschutz Foundation                                             | 227,500 | 148,500 | 167,500 | 240,000 | 465,000   | 485,000   | 545,000 | .         | 2,278,500 | 0.41%      |
| Galashiels Fund, Ltd.                                               | .       | 106,000 | 135,000 | 177,000 | 350,000   | 125,000   | 130,000 | 1,130,000 | 2,153,000 | 0.39%      |
| The Armstrong Foundation                                            | 182,000 | 115,000 | 160,000 | 207,000 | 519,500   | 270,000   | 242,000 | 364,500   | 2,060,000 | 0.37%      |
| The J. M. Kaplan Fund, Inc.                                         | 280,000 | 275,000 | 350,000 | 225,000 | 250,000   | 300,000   | 280,000 | .         | 1,960,000 | 0.35%      |
| H. Smith Richardson Charitable Trust                                | 205,000 | .       | 348,570 | 720,395 | 375,000   | .         | .       | 300,000   | 1,948,965 | 0.35%      |
| The Ambrose Monell Foundation                                       | 225,000 | 225,000 | 235,000 | 260,000 | 260,000   | 260,000   | 260,000 | 200,000   | 1,925,000 | 0.35%      |
| General Motors Foundation, Inc.                                     | 575,000 | 560,000 | 307,500 | 135,000 | 197,500   | 130,000   | .       | 15,000    | 1,920,000 | 0.35%      |
| Chase Foundation of Virginia                                        | 252,000 | 154,680 | 244,500 | 231,000 | 212,500   | 194,500   | 240,500 | 300,000   | 1,829,680 | 0.33%      |
| The T. Boone Pickens Foundation                                     | .       | .       | .       | .       | 1,000,000 | 800,000   | .       | .         | 1,800,000 | 0.32%      |
| Richard & Barbara Gaby Foundation                                   | .       | .       | .       | 200,000 | 520,000   | 10,000    | 514,560 | 510,000   | 1,754,560 | 0.32%      |
| The TWS Foundation                                                  | 328,200 | 50,000  | 210,000 | 451,600 | 380,000   | 317,950   | .       | .         | 1,737,750 | 0.31%      |
| David J. & Mary L. G. Theroux Foundation                            | 200,000 | 320,000 | 250,000 | 260,000 | 270,000   | .         | 225,819 | 199,914   | 1,725,733 | 0.31%      |
| The San Francisco Foundation                                        | 239,500 | 181,500 | 265,000 | 216,000 | 193,500   | 89,200    | 159,000 | 300,000   | 1,643,700 | 0.30%      |
| Rose-Marie and Jack R. Anderson Foundation                          | 75,000  | 90,000  | 165,000 | 80,000  | 250,000   | 324,600   | 325,000 | 310,000   | 1,619,600 | 0.29%      |
| Koret Foundation                                                    | 347,500 | 439,000 | 89,000  | 123,000 | 106,500   | 134,000   | 96,500  | 267,000   | 1,602,500 | 0.29%      |
| The JM Foundation                                                   | 95,000  | 140,000 | 225,000 | 140,000 | 30,000    | 335,000   | 310,000 | 285,000   | 1,560,000 | 0.28%      |
| The Bodman Foundation                                               | 130,000 | 85,000  | 290,000 | 275,000 | 325,000   | 75,000    | 165,000 | 200,000   | 1,545,000 | 0.28%      |
| The Starr Foundation                                                | .       | 500,000 | .       | 550,000 | 25,000    | 275,000   | 100,000 | 85,000    | 1,535,000 | 0.28%      |
| Charles and Ann Johnson Foundation                                  | 28,756  | 130,020 | 36,000  | 6,000   | 25,000    | 30,000    | 615,675 | 590,000   | 1,461,451 | 0.26%      |
| Modzelewski Charitable Trust                                        | 340,000 | 300,350 | 220,000 | 250,000 | .         | 300,000   | .       | 2,000     | 1,412,350 | 0.25%      |
| Communities Foundation of Texas, Inc.                               | 61,600  | 164,600 | 144,100 | 160,000 | 209,750   | 361,000   | 217,300 | 33,000    | 1,351,350 | 0.24%      |
| The Roberts Foundation                                              | 150,000 | 200,000 | 150,000 | .       | 200,000   | 100,000   | 50,000  | 500,000   | 1,350,000 | 0.24%      |
| Barney Family Foundation                                            | .       | 100,000 | 170,000 | 200,000 | 150,000   | 200,000   | 200,000 | 295,000   | 1,315,000 | 0.24%      |
| The E. L. Craig Foundation                                          | 125,000 | 135,000 | 80,000  | 150,000 | 150,000   | 205,000   | 80,500  | 350,000   | 1,275,500 | 0.23%      |
| Stephen Bechtel Fund                                                | .       | .       | .       | .       | .         | 140,000   | 250,000 | 850,000   | 1,240,000 | 0.22%      |
| Robert & Ardis James Foundation                                     | .       | 2,000   | 156,000 | 100,000 | 200,000   | 200,000   | 230,000 | 304,200   | 1,192,200 | 0.21%      |
| The John D. and Catherine T. MacArthur Foundation                   | 50,000  | .       | .       | .       | 600,000   | .         | .       | 525,000   | 1,175,000 | 0.21%      |
| The Woods Charitable Foundation                                     | .       | .       | 250,000 | 250,000 | .         | 300,000   | 350,000 | .         | 1,150,000 | 0.21%      |
| Douglas & Maria DeVos Foundation                                    | .       | .       | 30,000  | 25,000  | .         | 25,000    | 525,000 | 500,000   | 1,105,000 | 0.20%      |
| The Grover Hermann Foundation                                       | 230,000 | 262,500 | 287,500 | 262,500 | 35,000    | .         | 10,000  | 10,000    | 1,097,500 | 0.20%      |
| The Challenge Foundation                                            | .       | .       | .       | 41,075  | 133,293   | 525,000   | 212,600 | 185,000   | 1,096,968 | 0.20%      |
| Ed Foundation                                                       | 15,000  | 20,000  | 10,000  | 284,000 | 91,000    | 287,000   | 167,000 | 200,495   | 1,074,495 | 0.19%      |
| Malott Family Foundation                                            | 60,000  | 30,000  | 45,000  | 45,000  | 275,000   | 315,000   | 20,000  | 270,500   | 1,060,500 | 0.19%      |
| John S. and James L. Knight Foundation                              | .       | 55,000  | 900,000 | .       | .         | .         | .       | 98,500    | 1,053,500 | 0.19%      |
| The Andrew Cader Foundation, Inc.                                   | .       | 125,000 | 300,000 | 126,000 | 100,000   | 177,500   | 125,000 | 100,000   | 1,053,500 | 0.19%      |
| John Dawson Foundation                                              | 150,000 | 150,400 | 125,000 | .       | 100,000   | 150,000   | 350,000 | 25,000    | 1,050,400 | 0.19%      |
| The Jeld-Wen Foundation                                             | 195,000 | 185,000 | 395,000 | .       | 240,000   | .         | .       | .         | 1,015,000 | 0.18%      |
| Lovett & Ruth Peters Foundation                                     | .       | .       | .       | .       | 297,100   | 232,000   | 110,000 | 375,000   | 1,014,100 | 0.18%      |



| Foundation                                      | 2003    | 2004    | 2005    | 2006    | 2007    | 2008    | 2009    | 2010      | Total     | % of Total |
|-------------------------------------------------|---------|---------|---------|---------|---------|---------|---------|-----------|-----------|------------|
| Dean & Barbara White Family Foundation, Inc.    | .       | .       | .       | .       | .       | .       | .       | 1,000,000 | 1,000,000 | 0.18%      |
| The William and Inez Mabie Family Foundation    | 500,000 | 500,000 | .       | .       | .       | .       | .       | .         | 1,000,000 | 0.18%      |
| The Rodney Fund                                 | 153,000 | 125,065 | 195,750 | 160,925 | .       | 191,000 | 160,000 | .         | 985,740   | 0.18%      |
| Hirsch Family Foundation                        | .       | .       | 144,000 | 325,926 | 478,591 | .       | .       | .         | 948,517   | 0.17%      |
| The Chisholm Foundation                         | 165,000 | 145,000 | 175,000 | 185,000 | .       | .       | 130,000 | 145,000   | 945,000   | 0.17%      |
| Eli Lilly and Company Foundation                | 85,000  | 140,000 | 160,000 | 135,500 | 140,000 | 105,000 | 85,000  | 55,000    | 905,500   | 0.16%      |
| Covenant Foundation, Inc.                       | 245,000 | 245,000 | 105,000 | 60,000  | 155,000 | 20,000  | 10,000  | 50,000    | 890,000   | 0.16%      |
| Aequus Institute                                | 121,000 | 118,500 | 110,000 | 118,000 | 125,000 | 108,000 | 84,000  | 104,000   | 888,500   | 0.16%      |
| The William and Flora Hewlett Foundation        | 50,000  | .       | .       | 381,000 | 450,000 | .       | .       | .         | 881,000   | 0.16%      |
| The Richard Seth Staley Educational Foundation  | 90,922  | 3,953   | 157,500 | 174,000 | 158,500 | 106,275 | 93,850  | 81,703    | 866,703   | 0.16%      |
| The Alice M. & Thomas J. Tisch Foundation, Inc. | .       | 175,000 | 258,200 | 200,000 | .       | 200,000 | 22,850  | .         | 856,050   | 0.15%      |
| The Bristol-Myers Squibb Foundation, Inc.       | 125,000 | 130,000 | 130,000 | 130,000 | 100,000 | 195,000 | 25,000  | .         | 835,000   | 0.15%      |
| Charles F. De Ganahl Family Foundation          | .       | .       | 100,000 | 300,000 | 100,000 | 100,000 | 100,000 | 100,000   | 800,000   | 0.14%      |
| Sid W. Richardson Foundation                    | .       | 200,000 | 100,000 | 100,000 | 100,000 | 100,000 | 100,000 | 100,000   | 800,000   | 0.14%      |
| Barbara and Barre Seid Foundation               | 210,689 | 202,488 | 162,490 | 175,000 | 43,000  | .       | .       | .         | 793,667   | 0.14%      |
| Hilton Family Foundation                        | 77,619  | 40,500  | 45,000  | 33,000  | 58,800  | .       | 16,000  | 520,000   | 790,919   | 0.14%      |
| The Chrysler Foundation                         | 55,000  | 240,000 | 225,000 | 150,000 | 50,000  | 60,000  | .       | .         | 780,000   | 0.14%      |
| Claws Foundation                                | .       | .       | .       | .       | .       | .       | 125,000 | 635,000   | 760,000   | 0.14%      |
| The Atlantic Philanthropies                     | .       | .       | .       | .       | .       | 750,000 | .       | .         | 750,000   | 0.13%      |
| The Hofmann Family Foundation                   | 100,000 | .       | 250,000 | 100,000 | 100,000 | 100,000 | .       | 100,000   | 750,000   | 0.13%      |
| Carnegie Corporation of New York                | 50,000  | .       | 100,000 | 22,000  | 250,000 | 45,000  | 200,000 | 50,000    | 717,000   | 0.13%      |
| J. P. Humphreys Foundation                      | 110,000 | 71,000  | 35,000  | 107,500 | 153,800 | 140,000 | 15,000  | 80,000    | 712,300   | 0.13%      |
| Gordon V. & Helen C. Smith Foundation           | 35,000  | .       | .       | 375,000 | .       | .       | .       | 300,000   | 710,000   | 0.13%      |
| E. A. Morris Charitable Foundation              | 85,000  | 155,000 | 157,500 | 200,000 | 65,000  | 25,000  | 12,500  | 2,500     | 702,500   | 0.13%      |
| Daniels Fund                                    | 10,000  | 175,000 | 185,000 | 80,000  | .       | 200,000 | .       | 50,000    | 700,000   | 0.13%      |
| WellPoint Foundation, Inc.                      | .       | .       | .       | 250,000 | 50,000  | .       | .       | 398,000   | 698,000   | 0.13%      |
| Pierre F. and Enid Goodrich Foundation          | 50,000  | .       | 105,000 | 116,000 | 115,000 | 115,000 | 95,000  | 90,000    | 686,000   | 0.12%      |
| Henry R. Kravis Foundation, Inc.                | 75,000  | 60,000  | .       | 100,000 | 100,000 | 200,000 | 100,000 | 50,000    | 685,000   | 0.12%      |
| The UPS Foundation                              | 125,000 | 90,000  | 140,000 | 115,000 | 65,000  | 40,000  | 42,500  | 55,000    | 672,500   | 0.12%      |
| William Howard Flowers, Jr. Foundation, Inc.    | .       | 100,000 | 110,000 | 110,000 | 110,000 | 110,000 | 10,000  | 120,000   | 670,000   | 0.12%      |
| The Jean I. & Charles H. Brunie Foundation      | 65,000  | 181,500 | 81,000  | 206,090 | 41,400  | 91,800  | .       | .         | 666,790   | 0.12%      |
| The Carson Family Charitable Trust              | 30,000  | 125,000 | 125,000 | 125,000 | 125,000 | 125,000 | .       | .         | 655,000   | 0.12%      |
| The Pew Charitable Trusts                       | .       | .       | .       | 650,000 | .       | .       | .       | .         | 650,000   | 0.12%      |
| Gilder Foundation, Inc.                         | 131,500 | 207,500 | 55,000  | 65,000  | 60,000  | 60,000  | 10,000  | 60,250    | 649,250   | 0.12%      |
| Dodge Jones Foundation                          | 70,000  | 70,000  | 125,000 | 180,000 | 30,000  | 31,500  | 22,500  | 109,500   | 638,500   | 0.11%      |
| Ed Uihlein Family Foundation                    | .       | .       | .       | .       | .       | 25,000  | 250,000 | 346,000   | 621,000   | 0.11%      |
| The Paul Singer Family Foundation               | 145,000 | 190,000 | .       | .       | .       | .       | 275,000 | .         | 610,000   | 0.11%      |
| S.D. Bechtel, Jr. Foundation                    | .       | .       | .       | .       | .       | .       | 607,500 | .         | 607,500   | 0.11%      |
| The Achelis Foundation                          | 130,000 | 45,000  | 140,000 | 75,000  | 135,000 | 75,000  | .       | .         | 600,000   | 0.11%      |
| Lumina Foundation for Education, Inc.           | .       | .       | .       | .       | .       | 300,000 | .       | 295,000   | 595,000   | 0.11%      |
| The Marcus Foundation, Inc.                     | 1,000   | 5,000   | 11,000  | 16,000  | 95,000  | 110,000 | 300,000 | 12,500    | 550,500   | 0.10%      |

| Foundation                                                   | 2003    | 2004    | 2005    | 2006    | 2007    | 2008   | 2009    | 2010    | Total   | % of Total |
|--------------------------------------------------------------|---------|---------|---------|---------|---------|--------|---------|---------|---------|------------|
| Dorothy D. and Joseph A. Moller Foundation                   | 25,000  | 160,000 | 7,500   | 127,500 | 15,000  | 72,000 | 61,500  | 72,000  | 540,500 | 0.10%      |
| Assurant Health Foundation                                   | 50,000  | 50,000  | 80,000  | 260,000 | 100,000 | .      | .       | .       | 540,000 | 0.10%      |
| The Capital Group Companies Charitable Foundation            | 115,000 | 115,800 | 76,800  | 113,600 | 53,200  | 5,000  | 16,000  | 5,240   | 500,640 | 0.09%      |
| Iowa West Foundation                                         | .       | 500,000 | .       | .       | .       | .      | .       | .       | 500,000 | 0.09%      |
| The Community Foundation Serving Richmond & Central Virginia | .       | .       | .       | .       | 111,000 | 15,000 | 372,000 | .       | 498,000 | 0.09%      |
| The Robert Wood Johnson Foundation                           | .       | .       | .       | 30,000  | .       | .      | .       | 399,900 | 429,900 | 0.08%      |
| The Thomas and Stacey Siebel Foundation                      | .       | .       | .       | .       | 100,000 | .      | 210,000 | 110,000 | 420,000 | 0.08%      |
| Taube Family Foundation                                      | 200,000 | .       | .       | 210,000 | .       | .      | .       | 3,250   | 413,250 | 0.07%      |
| The Harry and Jeanette Weinberg Foundation, Inc.             | 200,000 | 200,000 | .       | .       | .       | .      | .       | .       | 400,000 | 0.07%      |
| Timken Foundation of Canton                                  | .       | .       | .       | .       | .       | 50,000 | 200,000 | 150,000 | 400,000 | 0.07%      |
| The Abstraction Fund                                         | .       | .       | .       | .       | .       | .      | 208,000 | 176,325 | 384,325 | 0.07%      |
| Sweetfeet Foundation, Inc.                                   | .       | .       | 360,000 | .       | .       | .      | .       | .       | 360,000 | 0.06%      |
| Greater Kansas City Community Foundation                     | .       | .       | .       | 5,100   | 11,300  | 8,300  | 282,500 | 12,950  | 320,150 | 0.06%      |
| The Gordon and Mary Cain Foundation                          | 65,000  | 47,000  | 100,000 | 90,000  | .       | .      | .       | .       | 302,000 | 0.05%      |
| Foundation to Promote Open Society                           | .       | .       | .       | .       | .       | .      | 92,500  | 205,000 | 297,500 | 0.05%      |
| The Weismann Foundation                                      | .       | .       | .       | .       | 200,339 | .      | 80,000  | .       | 280,339 | 0.05%      |
| PacifiCorp Foundation                                        | .       | .       | .       | .       | .       | .      | 250,000 | .       | 250,000 | 0.04%      |
| K. C. Ames Foundation                                        | .       | 210,000 | .       | .       | .       | .      | .       | .       | 210,000 | 0.04%      |

## S-7 – Foundation Funding of U.S. National Climate Counter-movement By Organization and Year

| Recipient                                                | 2003       | 2004       | 2005       | 2006       | 2007       | 2008       | 2009       | 2010       | Total       |
|----------------------------------------------------------|------------|------------|------------|------------|------------|------------|------------|------------|-------------|
| American Enterprise Institute for Public Policy Research | 12,342,401 | 6,913,934  | 7,473,000  | 5,332,860  | 10,582,280 | 11,469,267 | 16,506,740 | 16,071,689 | 86,692,171  |
| Heritage Foundation                                      | 5,730,376  | 9,491,600  | 7,292,664  | 11,083,164 | 12,385,850 | 14,713,785 | 8,202,979  | 7,462,770  | 76,363,188  |
| 49 Other Organizations - < 1%                            | 32,042,277 | 34,443,130 | 42,650,518 | 50,087,449 | 53,165,684 | 59,058,247 | 55,334,716 | 64,205,248 | 390,987,269 |
| Hoover Institution on War, Revolution and Peace          | 3,302,150  | 4,262,120  | 6,002,417  | 8,972,796  | 5,496,242  | 7,313,103  | 3,293,175  | 6,720,952  | 45,362,955  |
| Manhattan Institute for Policy Research                  | 3,154,200  | 3,738,317  | 4,290,492  | 4,795,630  | 4,809,143  | 4,930,919  | 4,204,850  | 3,140,400  | 33,063,951  |
| Cato Institute                                           | 2,581,500  | 3,043,388  | 3,984,050  | 3,851,550  | 4,337,020  | 4,386,501  | 3,753,350  | 4,646,698  | 30,584,057  |
| Hudson Institute                                         | 1,703,600  | 2,102,200  | 2,772,800  | 3,509,590  | 3,745,850  | 5,348,050  | 2,446,969  | 3,913,475  | 25,542,534  |
| Atlas Economic Research Foundation                       | 4,330,427  | 3,883,385  | 2,318,655  | 3,321,664  | 2,626,877  | 2,141,700  | 2,404,821  | 3,437,014  | 24,464,543  |
| Americans for Prosperity Foundation                      | 377,500    | 207,500    | 1,586,250  | 1,815,300  | 1,560,500  | 3,524,000  | 4,696,631  | 8,978,411  | 22,746,092  |
| John Locke Foundation                                    | 1,613,714  | 1,649,707  | 1,840,619  | 2,842,957  | 2,696,008  | 2,789,508  | 1,842,826  | 2,724,508  | 17,999,847  |
| Heartland Institute                                      | 615,189    | 697,788    | 876,927    | 490,000    | 3,174,937  | 4,798,250  | 3,636,280  | 2,366,900  | 16,656,271  |
| Reason Foundation                                        | 1,062,500  | 1,542,350  | 1,615,180  | 1,777,000  | 1,787,250  | 2,264,500  | 2,517,548  | 2,433,274  | 14,999,602  |
| Media Research Center                                    | 1,793,756  | 718,221    | 765,520    | 2,150,900  | 1,397,700  | 1,603,000  | 2,516,000  | 3,539,750  | 14,484,847  |
| Mercatus Center                                          | 224,000    | 301,500    | 1,794,000  | 4,453,471  | 3,370,192  | 1,719,500  | 645,300    | 1,784,700  | 14,292,663  |
| National Center for Policy Analysis                      | 1,649,100  | 1,893,670  | 2,247,405  | 1,694,926  | 2,012,241  | 1,809,200  | 1,635,995  | 993,500    | 13,936,037  |
| Competitive Enterprise Institute                         | 1,532,320  | 1,403,590  | 1,533,740  | 1,538,250  | 1,630,694  | 1,479,508  | 2,003,906  | 1,334,450  | 12,456,458  |
| State Policy Network                                     | 211,000    | 262,110    | 259,500    | 632,700    | 2,113,600  | 2,173,250  | 3,280,747  | 3,091,070  | 12,023,977  |
| Pacific Research Institute for Public Policy             | 1,201,500  | 1,242,470  | 1,084,000  | 1,291,500  | 1,626,500  | 1,499,751  | 1,806,750  | 1,635,500  | 11,387,971  |
| Independent Womens Forum                                 | 1,539,000  | 810,100    | 288,500    | 310,000    | 496,157    | 305,000    | 3,322,000  | 374,250    | 7,445,007   |
| Landmark Legal Foundation                                | 826,000    | 1,086,300  | 1,307,000  | 1,072,600  | 807,600    | 721,500    | 665,000    | 467,750    | 6,953,750   |
| FreedomWorks Foundation                                  | 10,000     | 300,000    | 495,000    | 207,000    | 1,661,000  | 476,000    | 651,000    | 1,537,000  | 5,337,000   |
| Texas Public Policy Foundation                           | 245,000    | 268,294    | 560,892    | 384,920    | 633,500    | 817,000    | 1,272,000  | 1,103,003  | 5,284,609   |
| Independent Institute                                    | 324,000    | 463,500    | 1,165,500  | 911,425    | 726,430    | 458,680    | 611,499    | 262,514    | 4,923,548   |
| Committee for a Constructive Tomorrow                    | 102,000    | 290,000    | 255,000    | 270,000    | 260,000    | 908,500    | 1,103,194  | 1,482,754  | 4,671,448   |
| Capital Research Center                                  | 588,000    | 636,600    | 661,500    | 583,500    | 682,500    | 432,500    | 425,500    | 415,600    | 4,425,700   |
| Mackinac Center for Public Policy                        | 376,400    | 312,700    | 11,000     | 95,000     | 603,000    | 594,853    | 1,235,000  | 1,085,500  | 4,313,453   |
| George C. Marshall Institute                             | 493,000    | 500,000    | 831,570    | 508,500    | 477,000    | 537,000    | 420,000    | 350,000    | 4,117,070   |
| Independence Institute                                   | 205,905    | 350,250    | 426,661    | 354,148    | 425,000    | 725,000    | 805,000    | 636,000    | 3,927,964   |
| American Legislative Exchange Council                    | 555,000    | 412,000    | 254,000    | 267,500    | 198,500    | 553,000    | 668,858    | 794,500    | 3,703,358   |
| Cascade Policy Institute                                 | 100,000    | 124,500    | 244,500    | 135,575    | 187,293    | 694,600    | 492,000    | 455,000    | 2,433,468   |
| James Madison Institute for Public Policy Studies        | 75,000     | 65,000     | 170,000    | 75,500     | 269,950    | 297,924    | 397,667    | 838,000    | 2,189,041   |
| Southeastern Legal Foundation                            | 21,000     | 363,000    | 351,000    | 406,000    | 226,000    | 200,000    | 400,000    | 205,000    | 2,172,000   |
| National Taxpayers Union Foundation                      | 150,000    | 186,000    | 192,000    | 203,500    | 752,250    | 166,600    | 143,000    | 57,600     | 1,850,950   |
| Oklahoma Council of Public Affairs                       | .          | 350,000    | 625,000    | 45,000     | 30,000     | 400,000    | 45,000     | 25,000     | 1,520,000   |
| Institute for Energy Research                            | 10,000     | .          | .          | .          | 65,000     | 360,000    | 460,000    | 405,000    | 1,300,000   |

| Recipient                                                            | 2003    | 2004    | 2005    | 2006    | 2007      | 2008      | 2009    | 2010      | Total     |
|----------------------------------------------------------------------|---------|---------|---------|---------|-----------|-----------|---------|-----------|-----------|
| American Council for Capital Formation Center for Policy Research    | 25,000  | 325,000 | 415,000 | .       | 10,000    | 70,000    | 200,000 | 150,000   | 1,195,000 |
| National Association of Manufacturers                                | .       | .       | .       | .       | .         | 1,163,650 | .       | .         | 1,163,650 |
| International Policy Network - U.S.                                  | 60,000  | 47,820  | 124,000 | 68,500  | 72,500    | 140,000   | 96,500  | 499,850   | 1,109,170 |
| Washington Policy Center                                             | 30,000  | 47,000  | 67,000  | 42,000  | 232,500   | 142,700   | 242,500 | 234,575   | 1,038,275 |
| Environmental Literacy Council                                       | 237,516 | 165,000 | 225,000 | 127,500 | 152,500   | 115,000   | .       | .         | 1,022,516 |
| FreedomWorks                                                         | 43,500  | 11,000  | 50,000  | 110,000 | 10,000    | 80,000    | 177,000 | 541,000   | 1,022,500 |
| Oregon Institute of Science and Medicine                             | .       | .       | 160,000 | 350,000 | 100,000   | 100,000   | 100,000 | 200,000   | 1,010,000 |
| Coalition for American Jobs                                          | .       | .       | .       | .       | .         | .         | .       | 1,000,000 | 1,000,000 |
| Responsible Resources                                                | .       | .       | .       | .       | 1,000,000 | .         | .       | .         | 1,000,000 |
| Mountain States Legal Foundation                                     | 118,500 | 87,500  | 114,500 | 43,500  | 140,750   | 131,100   | 139,000 | 94,000    | 868,850   |
| National Center for Public Policy Research                           | 135,000 | 145,000 | 121,000 | 64,700  | 50,000    | 40,000    | 35,000  | 69,750    | 660,450   |
| American Council for Capital Formation                               | 145,000 | .       | 25,000  | 50,000  | 50,000    | 200,000   | 150,000 | 10,000    | 630,000   |
| American Conservative Union Foundation                               | 31,000  | 8,250   | 99,000  | 45,000  | 121,500   | 144,000   | 103,000 | 62,000    | 613,750   |
| Free Enterprise Education Institute                                  | 50,000  | 20,000  | 195,340 | 75,847  | 161,500   | 75,000    | .       | .         | 577,687   |
| Thomas Jefferson Institute for Public Policy                         | 29,000  | 25,000  | 59,000  | 39,000  | 8,500     | 78,500    | 170,450 | 109,000   | 518,450   |
| Center for the Study of Carbon Dioxide and Global Change/CO2 Science | 90,000  | .       | 60,000  | .       | 150,000   | 129,400   | 79,400  | .         | 508,800   |
| Annapolis Center for Science-Based Public Policy                     | 75,000  | 95,000  | 125,000 | 103,000 | 20,000    | 20,000    | 40,000  | .         | 478,000   |
| American Friends of the Institute of Economic Affairs                | 14,000  | 134,150 | 15,000  | 40,900  | 32,000    | 72,000    | 11,000  | 10,000    | 329,050   |
| Free Enterprise Institute                                            | 100,000 | 50,000  | 50,000  | 55,000  | 20,000    | .         | 20,000  | .         | 295,000   |
| Congress of Racial Equality                                          | 40,000  | 135,000 | 75,000  | 25,000  | .         | .         | .       | .         | 275,000   |
| Center for the Defense of Free Enterprise                            | 45,000  | 130,000 | 60,000  | .       | .         | .         | .       | .         | 235,000   |
| 60 Plus                                                              | .       | .       | .       | .       | .         | 143,000   | 35,000  | 25,000    | 203,000   |
| Independent Petroleum Association of America                         | .       | .       | .       | .       | .         | 27,356    | 60,000  | 100,000   | 187,356   |
| U.S. Chamber Of Commerce                                             | .       | .       | .       | .       | .         | 50,000    | 136,500 | .         | 186,500   |
| Consumer Alert                                                       | 54,000  | 92,000  | 24,000  | .       | .         | .         | .       | .         | 170,000   |
| Consumer Energy Alliance                                             | .       | .       | .       | .       | .         | 30,000    | 67,500  | 35,000    | 132,500   |
| Institute for the Study of Earth and Man                             | .       | 25,000  | .       | 25,000  | 50,000    | 25,000    | .       | .         | 125,000   |
| Alliance to Save Energy                                              | .       | .       | .       | .       | .         | .         | 100,000 | .         | 100,000   |
| National Taxpayers Union                                             | .       | 2,000   | 15,000  | .       | 10,000    | 10,000    | .       | 10,000    | 47,000    |
| National Petrochemical and Refiners Association                      | .       | .       | .       | .       | .         | .         | .       | 45,000    | 45,000    |
| Free Enterprise Foundation                                           | .       | 5,000   | .       | 25,000  | .         | .         | .       | .         | 30,000    |
| Free Enterprise Fund                                                 | .       | .       | .       | 25,000  | .         | .         | .       | .         | 25,000    |
| Science and Environmental Policy Project                             | 5,000   | 5,000   | .       | .       | 5,000     | .         | 10,000  | .         | 25,000    |
| Science and Public Policy Institute                                  | .       | .       | .       | .       | .         | .         | .       | 25,000    | 25,000    |
| Advancement of Sound Science Center                                  | 10,000  | 10,000  | .       | .       | .         | .         | .       | .         | 20,000    |

**S-8 – Foundation Funding of U.S. National Climate Counter-movement Organizations – By Foundation**

| Foundation                   | Recipient                                                | 2003    | 2004    | 2005    | 2006    | 2007    | 2008      | 2009    | 2010      |
|------------------------------|----------------------------------------------------------|---------|---------|---------|---------|---------|-----------|---------|-----------|
| Aequus Institute             | American Enterprise Institute for Public Policy Research | .       | .       | .       | .       | .       | .         | 1,000   | .         |
| Aequus Institute             | American Friends of the Institute of Economic Affairs    | .       | .       | .       | .       | .       | .         | 1,000   | .         |
| Aequus Institute             | Atlas Economic Research Foundation                       | .       | .       | .       | 5,000   | 5,000   | .         | 1,000   | 1,000     |
| Aequus Institute             | Capital Research Center                                  | 5,000   | 3,000   | 3,000   | 3,000   | 5,000   | 3,000     | .       | .         |
| Aequus Institute             | Cato Institute                                           | .       | .       | 2,500   | 2,500   | 2,500   | .         | 1,000   | .         |
| Aequus Institute             | Competitive Enterprise Institute                         | .       | 7,500   | .       | 2,500   | 5,000   | .         | 2,000   | .         |
| Aequus Institute             | Heritage Foundation                                      | 100,000 | 100,000 | 100,000 | 100,000 | 100,000 | 100,000   | 75,000  | 100,000   |
| Aequus Institute             | Landmark Legal Foundation                                | 2,500   | 1,000   | 2,000   | 2,500   | 2,500   | 2,500     | 1,000   | 1,000     |
| Aequus Institute             | Mercatus Center                                          | 1,000   | 1,000   | .       | .       | .       | .         | .       | .         |
| Aequus Institute             | Pacific Research Institute for Public Policy             | 7,500   | 2,500   | .       | .       | 2,500   | .         | 1,000   | .         |
| Aequus Institute             | Reason Foundation                                        | 5,000   | 2,500   | 2,500   | 2,500   | 2,500   | 2,500     | 1,000   | 1,000     |
| Aequus Institute             | Southeastern Legal Foundation                            | .       | 1,000   | .       | .       | .       | .         | .       | .         |
| Aequus Institute             | State Policy Network                                     | .       | .       | .       | .       | .       | .         | .       | 1,000     |
| Alfred C. Munger Foundation  | Hoover Institution on War, Revolution and Peace          | 250,000 | 300,000 | 300,000 | 300,000 | 300,000 | 300,000   | 300,000 | 300,000   |
| American Petroleum Institute | 60 Plus                                                  | .       | .       | .       | .       | .       | 143,000   | 35,000  | 25,000    |
| American Petroleum Institute | American Conservative Union Foundation                   | .       | .       | .       | .       | .       | 33,500    | 25,000  | .         |
| American Petroleum Institute | American Council for Capital Formation                   | .       | .       | .       | .       | .       | 100,000   | 50,000  | 10,000    |
| American Petroleum Institute | American Enterprise Institute for Public Policy Research | .       | .       | .       | .       | .       | 35,000    | 25,000  | .         |
| American Petroleum Institute | American Legislative Exchange Council                    | .       | .       | .       | .       | .       | 38,000    | 40,000  | 10,000    |
| American Petroleum Institute | Americans for Prosperity Foundation                      | .       | .       | .       | .       | .       | 30,000    | 43,500  | 25,500    |
| American Petroleum Institute | Annapolis Center for Science-Based Public Policy         | .       | .       | .       | .       | .       | .         | 40,000  | .         |
| American Petroleum Institute | Coalition for American Jobs                              | .       | .       | .       | .       | .       | .         | .       | 1,000,000 |
| American Petroleum Institute | Competitive Enterprise Institute                         | .       | .       | .       | .       | .       | .         | 25,000  | .         |
| American Petroleum Institute | Consumer Energy Alliance                                 | .       | .       | .       | .       | .       | 30,000    | 67,500  | 35,000    |
| American Petroleum Institute | FreedomWorks                                             | .       | .       | .       | .       | .       | 75,000    | 55,000  | .         |
| American Petroleum Institute | Heartland Institute                                      | .       | .       | .       | .       | .       | 25,000    | .       | .         |
| American Petroleum Institute | Independent Petroleum Association of America             | .       | .       | .       | .       | .       | 27,356    | 60,000  | 100,000   |
| American Petroleum Institute | Institute for Energy Research                            | .       | .       | .       | .       | .       | 60,000    | 50,000  | 50,000    |
| American Petroleum Institute | James Madison Institute for Public Policy Studies        | .       | .       | .       | .       | .       | 30,000    | 30,000  | .         |
| American Petroleum Institute | Mercatus Center                                          | .       | .       | .       | .       | .       | 25,000    | .       | .         |
| American Petroleum Institute | National Association of Manufacturers                    | .       | .       | .       | .       | .       | 1,163,650 | .       | .         |

| Foundation                        | Recipient                                                | 2003      | 2004      | 2005      | 2006    | 2007    | 2008      | 2009      | 2010      |
|-----------------------------------|----------------------------------------------------------|-----------|-----------|-----------|---------|---------|-----------|-----------|-----------|
| American Petroleum Institute      | National Petrochemical and Refiners Association          | .         | .         | .         | .       | .       | .         | .         | 45,000    |
| American Petroleum Institute      | U.S. Chamber Of Commerce                                 | .         | .         | .         | .       | .       | 50,000    | 136,500   | .         |
| Annenberg Foundation              | Hoover Institution on War, Revolution and Peace          | 500,000   | 2,000,000 | 2,100,000 | .       | .       | 3,400,000 | .         | 3,300,000 |
| Assurant Health Foundation        | American Legislative Exchange Council                    | 25,000    | .         | .         | .       | .       | .         | .         | .         |
| Assurant Health Foundation        | Cato Institute                                           | .         | .         | .         | 100,000 | 100,000 | .         | .         | .         |
| Assurant Health Foundation        | Heartland Institute                                      | .         | 20,000    | 30,000    | 60,000  | .       | .         | .         | .         |
| Assurant Health Foundation        | Manhattan Institute for Policy Research                  | .         | .         | .         | 50,000  | .       | .         | .         | .         |
| Assurant Health Foundation        | National Center for Policy Analysis                      | 25,000    | 30,000    | 50,000    | 50,000  | .       | .         | .         | .         |
| Barbara and Barre Seid Foundation | Capital Research Center                                  | 1,000     | .         | .         | .       | .       | .         | .         | .         |
| Barbara and Barre Seid Foundation | Cato Institute                                           | 25,000    | .         | 5,000     | .       | .       | .         | .         | .         |
| Barbara and Barre Seid Foundation | Competitive Enterprise Institute                         | 30,000    | 25,700    | 152,490   | .       | .       | .         | .         | .         |
| Barbara and Barre Seid Foundation | Congress of Racial Equality                              | .         | .         | .         | 25,000  | .       | .         | .         | .         |
| Barbara and Barre Seid Foundation | Heartland Institute                                      | 154,689   | 176,788   | .         | .       | 43,000  | .         | .         | .         |
| Barbara and Barre Seid Foundation | Heritage Foundation                                      | .         | .         | 5,000     | .       | .       | .         | .         | .         |
| Barbara and Barre Seid Foundation | State Policy Network                                     | .         | .         | .         | 150,000 | .       | .         | .         | .         |
| Barney Family Foundation          | Americans for Prosperity Foundation                      | .         | .         | .         | .       | .       | .         | .         | 100,000   |
| Barney Family Foundation          | Cato Institute                                           | .         | 50,000    | 60,000    | 100,000 | 50,000  | 50,000    | 50,000    | 10,000    |
| Barney Family Foundation          | Heartland Institute                                      | .         | .         | .         | .       | .       | 25,000    | 25,000    | 50,000    |
| Barney Family Foundation          | Heritage Foundation                                      | .         | 50,000    | 110,000   | 100,000 | 100,000 | 100,000   | 100,000   | 100,000   |
| Barney Family Foundation          | Hoover Institution on War, Revolution and Peace          | .         | .         | .         | .       | .       | 25,000    | 25,000    | 25,000    |
| Barney Family Foundation          | Pacific Research Institute for Public Policy             | .         | .         | .         | .       | .       | .         | .         | 10,000    |
| Bialkin Family Foundation         | Committee for a Constructive Tomorrow                    | .         | .         | .         | .       | .       | .         | 2,500     | .         |
| Bialkin Family Foundation         | Heritage Foundation                                      | .         | .         | 7,500     | 7,500   | 15,000  | 1,011,480 | 10,000    | 10,000    |
| Bialkin Family Foundation         | Hudson Institute                                         | .         | .         | .         | .       | .       | .         | .         | 5,000     |
| Bialkin Family Foundation         | Manhattan Institute for Policy Research                  | .         | 10,000    | 10,000    | 10,000  | 20,000  | 1,221,660 | .         | 15,000    |
| Bialkin Family Foundation         | National Center for Public Policy Research               | .         | .         | .         | .       | .       | .         | .         | 250       |
| Bialkin Family Foundation         | Science and Environmental Policy Project                 | .         | .         | .         | .       | 5,000   | .         | .         | .         |
| Bill & Melinda Gates Foundation   | American Enterprise Institute for Public Policy Research | .         | .         | .         | .       | 500,000 | .         | 2,144,000 | .         |
| Bill & Melinda Gates Foundation   | Hudson Institute                                         | .         | .         | 15,000    | .       | 400,000 | .         | 399,649   | .         |
| Bill & Melinda Gates Foundation   | Manhattan Institute for Policy Research                  | 96,000    | 115,000   | 92,575    | .       | .       | .         | .         | .         |
| Bill & Melinda Gates Foundation   | Texas Public Policy Foundation                           | .         | .         | 170,000   | .       | .       | .         | .         | .         |
| Brady Education Foundation, Inc.  | American Enterprise Institute for Public Policy Research | 5,000,000 | .         | .         | .       | .       | .         | .         | .         |
| Brady Education Foundation, Inc.  | Independent Womens Forum                                 | 1,029,000 | .         | .         | .       | .       | .         | .         | .         |

| Foundation                             | Recipient                                                | 2003    | 2004    | 2005    | 2006    | 2007    | 2008    | 2009    | 2010    |
|----------------------------------------|----------------------------------------------------------|---------|---------|---------|---------|---------|---------|---------|---------|
| Brady Education Foundation, Inc.       | Manhattan Institute for Policy Research                  | 800,000 | .       | .       | .       | .       | .       | .       | .       |
| Carnegie Corporation of New York       | American Enterprise Institute for Public Policy Research | 25,000  | .       | .       | 22,000  | .       | 20,000  | .       | .       |
| Carnegie Corporation of New York       | Cato Institute                                           | .       | .       | 50,000  | .       | 50,000  | 25,000  | .       | 50,000  |
| Carnegie Corporation of New York       | Hudson Institute                                         | 25,000  | .       | .       | .       | .       | .       | 200,000 | .       |
| Carnegie Corporation of New York       | Manhattan Institute for Policy Research                  | .       | .       | 50,000  | .       | 200,000 | .       | .       | .       |
| Charles and Ann Johnson Foundation     | American Enterprise Institute for Public Policy Research | 1,000   | .       | 1,000   | .       | .       | .       | .       | .       |
| Charles and Ann Johnson Foundation     | Atlas Economic Research Foundation                       | .       | .       | 5,000   | .       | .       | 15,000  | 10,000  | 10,000  |
| Charles and Ann Johnson Foundation     | Capital Research Center                                  | .       | .       | .       | .       | .       | .       | .       | 5,000   |
| Charles and Ann Johnson Foundation     | Cato Institute                                           | .       | .       | .       | .       | .       | 1,000   | .       | 1,000   |
| Charles and Ann Johnson Foundation     | FreedomWorks                                             | .       | .       | .       | .       | .       | .       | .       | 1,000   |
| Charles and Ann Johnson Foundation     | Heritage Foundation                                      | 2,500   | .       | .       | 6,000   | .       | 5,000   | .       | 5,000   |
| Charles and Ann Johnson Foundation     | Hoover Institution on War, Revolution and Peace          | .       | 130,020 | .       | .       | .       | .       | 565,675 | 500,000 |
| Charles and Ann Johnson Foundation     | Independent Institute                                    | .       | .       | .       | .       | .       | 1,000   | .       | 1,000   |
| Charles and Ann Johnson Foundation     | Manhattan Institute for Policy Research                  | .       | .       | .       | .       | .       | 1,000   | .       | 2,000   |
| Charles and Ann Johnson Foundation     | Media Research Center                                    | 25,256  | .       | 30,000  | .       | 25,000  | 1,000   | 30,000  | 30,000  |
| Charles and Ann Johnson Foundation     | Mercatus Center                                          | .       | .       | .       | .       | .       | 1,000   | 10,000  | 10,000  |
| Charles and Ann Johnson Foundation     | National Center for Policy Analysis                      | .       | .       | .       | .       | .       | 5,000   | .       | 20,000  |
| Charles and Ann Johnson Foundation     | Pacific Research Institute for Public Policy             | .       | .       | .       | .       | .       | .       | .       | 5,000   |
| Charles F. De Ganahl Family Foundation | Oregon Institute of Science and Medicine                 | .       | .       | 100,000 | 300,000 | 100,000 | 100,000 | 100,000 | 100,000 |
| Chase Foundation of Virginia           | American Friends of the Institute of Economic Affairs    | 14,000  | .       | 15,000  | .       | 10,000  | 10,000  | 10,000  | 10,000  |
| Chase Foundation of Virginia           | Americans for Prosperity Foundation                      | .       | .       | .       | .       | .       | .       | .       | 25,000  |
| Chase Foundation of Virginia           | Atlas Economic Research Foundation                       | 34,000  | .       | 35,000  | 35,000  | 35,000  | 35,000  | .       | 37,000  |
| Chase Foundation of Virginia           | Capital Research Center                                  | 6,000   | 6,100   | 6,000   | 6,000   | 5,000   | 4,000   | 4,000   | 6,000   |
| Chase Foundation of Virginia           | Cascade Policy Institute                                 | 5,000   | 9,500   | 9,500   | 9,500   | 9,000   | 9,000   | 9,000   | 10,000  |
| Chase Foundation of Virginia           | Cato Institute                                           | 21,000  | .       | 25,000  | 25,000  | 23,000  | 23,000  | 23,000  | 25,000  |
| Chase Foundation of Virginia           | Committee for a Constructive Tomorrow                    | .       | .       | .       | .       | .       | 1,000   | 2,000   | 2,000   |
| Chase Foundation of Virginia           | Competitive Enterprise Institute                         | 20,000  | .       | 20,000  | 18,000  | 16,000  | .       | 16,000  | 19,000  |
| Chase Foundation of Virginia           | Consumer Alert                                           | 9,000   | .       | 9,000   | .       | .       | .       | .       | .       |
| Chase Foundation of Virginia           | FreedomWorks                                             | .       | .       | .       | .       | .       | .       | .       | 15,000  |
| Chase Foundation of Virginia           | George C. Marshall Institute                             | 3,000   | .       | 3,000   | 2,500   | 2,000   | 2,000   | .       | .       |
| Chase Foundation of Virginia           | Heartland Institute                                      | 30,000  | 30,500  | 25,000  | 25,000  | 15,000  | 15,000  | 15,000  | 25,000  |
| Chase Foundation of Virginia           | Independent Institute                                    | .       | .       | 5,000   | 5,000   | 8,000   | 8,000   | 8,000   | 8,000   |
| Chase Foundation of Virginia           | Independent Womens Forum                                 | .       | .       | .       | .       | .       | .       | 2,000   | 2,000   |

| Foundation                            | Recipient                                                | 2003    | 2004    | 2005    | 2006    | 2007    | 2008    | 2009    | 2010    |
|---------------------------------------|----------------------------------------------------------|---------|---------|---------|---------|---------|---------|---------|---------|
| Chase Foundation of Virginia          | Institute for Energy Research                            | .       | .       | .       | .       | .       | .       | .       | 5,000   |
| Chase Foundation of Virginia          | James Madison Institute for Public Policy Studies        | .       | .       | .       | .       | 2,000   | .       | .       | 2,000   |
| Chase Foundation of Virginia          | John Locke Foundation                                    | 10,000  | 10,980  | 10,000  | 12,000  | 10,000  | 10,000  | 10,000  | 10,000  |
| Chase Foundation of Virginia          | Landmark Legal Foundation                                | 5,000   | .       | 5,000   | 5,000   | 5,000   | 4,000   | 4,000   | 4,000   |
| Chase Foundation of Virginia          | Manhattan Institute for Policy Research                  | 13,000  | 12,200  | 10,000  | 10,000  | .       | .       | .       | .       |
| Chase Foundation of Virginia          | National Center for Policy Analysis                      | 34,000  | 37,820  | 34,000  | 34,000  | 34,000  | 34,000  | 84,000  | 36,000  |
| Chase Foundation of Virginia          | National Center for Public Policy Research               | .       | .       | .       | .       | .       | 1,000   | .       | .       |
| Chase Foundation of Virginia          | Pacific Research Institute for Public Policy             | 15,000  | 16,470  | 15,000  | 15,000  | 10,000  | 10,000  | 10,000  | 15,000  |
| Chase Foundation of Virginia          | Reason Foundation                                        | 14,000  | 15,250  | 14,000  | 25,000  | 25,000  | 25,000  | 30,000  | 30,000  |
| Chase Foundation of Virginia          | State Policy Network                                     | 15,000  | 15,860  | .       | .       | .       | .       | 10,000  | 10,000  |
| Chase Foundation of Virginia          | Thomas Jefferson Institute for Public Policy             | 4,000   | .       | 4,000   | 4,000   | 3,500   | 3,500   | 3,500   | 4,000   |
| Claws Foundation                      | Atlas Economic Research Foundation                       | .       | .       | .       | .       | .       | .       | .       | 75,000  |
| Claws Foundation                      | Cato Institute                                           | .       | .       | .       | .       | .       | .       | 100,000 | 500,000 |
| Claws Foundation                      | Competitive Enterprise Institute                         | .       | .       | .       | .       | .       | .       | 25,000  | 60,000  |
| Communities Foundation of Texas, Inc. | Heritage Foundation                                      | .       | .       | .       | .       | .       | 20,000  | 41,700  | 20,000  |
| Communities Foundation of Texas, Inc. | Independent Institute                                    | .       | .       | .       | .       | 24,750  | .       | .       | .       |
| Communities Foundation of Texas, Inc. | Institute for the Study of Earth and Man                 | .       | 25,000  | .       | 25,000  | 50,000  | 25,000  | .       | .       |
| Communities Foundation of Texas, Inc. | Media Research Center                                    | 25,000  | 45,500  | 46,000  | 50,000  | 75,000  | 50,000  | 25,500  | .       |
| Communities Foundation of Texas, Inc. | National Center for Policy Analysis                      | 36,600  | 94,100  | 98,100  | 85,000  | 60,000  | 256,000 | 150,100 | 13,000  |
| Communities Foundation of Texas, Inc. | Texas Public Policy Foundation                           | .       | .       | .       | .       | .       | 10,000  | .       | .       |
| Coors Affiliated Foundations          | American Conservative Union Foundation                   | .       | .       | .       | .       | .       | .       | 10,000  | .       |
| Coors Affiliated Foundations          | American Enterprise Institute for Public Policy Research | 50,000  | 50,000  | .       | 60,000  | 75,000  | .       | 150,000 | 150,000 |
| Coors Affiliated Foundations          | American Legislative Exchange Council                    | 50,000  | .       | .       | 50,000  | .       | .       | 50,000  | 50,000  |
| Coors Affiliated Foundations          | Americans for Prosperity Foundation                      | .       | .       | .       | .       | .       | .       | 50,000  | .       |
| Coors Affiliated Foundations          | Cascade Policy Institute                                 | .       | .       | 30,000  | .       | .       | 30,000  | .       | .       |
| Coors Affiliated Foundations          | Cato Institute                                           | 50,000  | 50,000  | .       | 75,000  | 75,000  | 150,000 | 150,000 | 150,000 |
| Coors Affiliated Foundations          | Competitive Enterprise Institute                         | 40,000  | .       | .       | 50,000  | .       | .       | 45,000  | .       |
| Coors Affiliated Foundations          | FreedomWorks Foundation                                  | .       | .       | .       | .       | .       | .       | 25,000  | .       |
| Coors Affiliated Foundations          | Heartland Institute                                      | 30,000  | .       | .       | .       | .       | .       | .       | .       |
| Coors Affiliated Foundations          | Heritage Foundation                                      | 200,000 | 200,000 | 200,000 | 200,000 | 200,000 | 150,000 | 150,000 | 150,000 |
| Coors Affiliated Foundations          | Hudson Institute                                         | 30,000  | .       | .       | 30,000  | .       | 30,000  | .       | .       |
| Coors Affiliated Foundations          | Independence Institute                                   | 50,000  | 60,000  | .       | 60,000  | 60,000  | 60,000  | 60,000  | 50,000  |
| Coors Affiliated Foundations          | Independent Institute                                    | .       | .       | 50,000  | .       | 50,000  | .       | .       | .       |



| Foundation                                   | Recipient                                                | 2003    | 2004    | 2005    | 2006    | 2007    | 2008    | 2009    | 2010      |
|----------------------------------------------|----------------------------------------------------------|---------|---------|---------|---------|---------|---------|---------|-----------|
| Coors Affiliated Foundations                 | Independent Womens Forum                                 | .       | 75,000  | .       | 50,000  | .       | .       | 50,000  | .         |
| Coors Affiliated Foundations                 | James Madison Institute for Public Policy Studies        | .       | .       | .       | .       | .       | .       | 25,000  | 25,000    |
| Coors Affiliated Foundations                 | Landmark Legal Foundation                                | 55,000  | 60,000  | 60,000  | 60,000  | 60,000  | 60,000  | 60,000  | .         |
| Coors Affiliated Foundations                 | Manhattan Institute for Policy Research                  | .       | 35,000  | .       | .       | 35,000  | .       | .       | 25,000    |
| Coors Affiliated Foundations                 | Media Research Center                                    | 50,000  | .       | 50,000  | .       | .       | 50,000  | .       | .         |
| Coors Affiliated Foundations                 | Mercatus Center                                          | .       | 30,000  | .       | .       | .       | .       | .       | .         |
| Coors Affiliated Foundations                 | Mountain States Legal Foundation                         | 75,000  | 75,000  | 75,000  | .       | 75,000  | 75,000  | 75,000  | 60,000    |
| Coors Affiliated Foundations                 | National Center for Policy Analysis                      | .       | 35,000  | .       | 40,000  | .       | 40,000  | .       | 25,000    |
| Coors Affiliated Foundations                 | National Center for Public Policy Research               | .       | .       | .       | .       | .       | 30,000  | .       | .         |
| Coors Affiliated Foundations                 | Pacific Research Institute for Public Policy             | .       | 50,000  | .       | 50,000  | 50,000  | .       | .       | 25,000    |
| Coors Affiliated Foundations                 | Reason Foundation                                        | 50,000  | .       | .       | 50,000  | .       | 60,000  | .       | 50,000    |
| Coors Affiliated Foundations                 | Southeastern Legal Foundation                            | .       | 35,000  | 50,000  | .       | 50,000  | .       | 50,000  | 30,000    |
| Coors Affiliated Foundations                 | State Policy Network                                     | .       | .       | 25,000  | .       | 30,000  | .       | 35,000  | 20,000    |
| Coors Affiliated Foundations                 | Texas Public Policy Foundation                           | .       | .       | .       | .       | .       | 30,000  | 30,000  | .         |
| Coors Affiliated Foundations                 | Washington Policy Center                                 | 10,000  | .       | .       | 10,000  | .       | .       | 20,000  | .         |
| Covenant Foundation, Inc.                    | Heartland Institute                                      | .       | .       | 5,000   | .       | .       | .       | .       | .         |
| Covenant Foundation, Inc.                    | Media Research Center                                    | 20,000  | 20,000  | .       | 20,000  | 20,000  | 20,000  | .       | .         |
| Covenant Foundation, Inc.                    | Mercatus Center                                          | 50,000  | 25,000  | .       | 10,000  | 10,000  | .       | .       | .         |
| Covenant Foundation, Inc.                    | Southeastern Legal Foundation                            | .       | 50,000  | 50,000  | 5,000   | .       | .       | .       | .         |
| Covenant Foundation, Inc.                    | Texas Public Policy Foundation                           | 175,000 | 150,000 | 50,000  | 25,000  | 125,000 | .       | 10,000  | 50,000    |
| Daniels Fund                                 | American Enterprise Institute for Public Policy Research | .       | 25,000  | 25,000  | .       | .       | .       | .       | .         |
| Daniels Fund                                 | American Legislative Exchange Council                    | 10,000  | .       | .       | .       | .       | .       | .       | .         |
| Daniels Fund                                 | Cato Institute                                           | .       | .       | 85,000  | .       | .       | .       | .       | .         |
| Daniels Fund                                 | Heritage Foundation                                      | .       | 75,000  | 75,000  | .       | .       | .       | .       | .         |
| Daniels Fund                                 | Independence Institute                                   | .       | 75,000  | .       | 55,000  | .       | 175,000 | .       | 50,000    |
| Daniels Fund                                 | James Madison Institute for Public Policy Studies        | .       | .       | .       | .       | .       | 25,000  | .       | .         |
| Daniels Fund                                 | State Policy Network                                     | .       | .       | .       | 25,000  | .       | .       | .       | .         |
| David J. & Mary L. G. Theroux Foundation     | Independent Institute                                    | 200,000 | 320,000 | 250,000 | 260,000 | 270,000 | .       | 225,819 | 199,914   |
| Dean & Barbara White Family Foundation, Inc. | FreedomWorks Foundation                                  | .       | .       | .       | .       | .       | .       | .       | 1,000,000 |
| Dodge Jones Foundation                       | American Conservative Union Foundation                   | .       | .       | .       | .       | .       | .       | .       | 5,000     |
| Dodge Jones Foundation                       | American Enterprise Institute for Public Policy Research | 10,000  | .       | 30,000  | 100,000 | 10,000  | 10,000  | .       | 20,000    |
| Dodge Jones Foundation                       | Capital Research Center                                  | 25,000  | .       | 10,000  | 10,000  | 10,000  | .       | .       | .         |
| Dodge Jones Foundation                       | Cato Institute                                           | .       | .       | .       | .       | .       | .       | .       | 1,500     |

| Foundation                       | Recipient                                                            | 2003      | 2004      | 2005      | 2006      | 2007      | 2008      | 2009      | 2010      |
|----------------------------------|----------------------------------------------------------------------|-----------|-----------|-----------|-----------|-----------|-----------|-----------|-----------|
| Dodge Jones Foundation           | Committee for a Constructive Tomorrow                                | .         | .         | .         | .         | .         | .         | 12,500    | 7,500     |
| Dodge Jones Foundation           | Free Enterprise Education Institute                                  | .         | 10,000    | .         | .         | .         | .         | .         | .         |
| Dodge Jones Foundation           | Heartland Institute                                                  | .         | .         | .         | .         | .         | .         | .         | 2,000     |
| Dodge Jones Foundation           | Heritage Foundation                                                  | .         | .         | .         | .         | .         | .         | 10,000    | 20,000    |
| Dodge Jones Foundation           | Independent Institute                                                | .         | .         | .         | .         | .         | .         | .         | 2,500     |
| Dodge Jones Foundation           | Manhattan Institute for Policy Research                              | .         | .         | 10,000    | 10,000    | .         | .         | .         | 5,000     |
| Dodge Jones Foundation           | Media Research Center                                                | 25,000    | 10,000    | 10,000    | 10,000    | 10,000    | .         | .         | 15,000    |
| Dodge Jones Foundation           | Mercatus Center                                                      | .         | .         | 10,000    | .         | .         | 10,000    | .         | 2,500     |
| Dodge Jones Foundation           | National Center for Policy Analysis                                  | 10,000    | 50,000    | 50,000    | 50,000    | .         | 11,500    | .         | 15,000    |
| Dodge Jones Foundation           | State Policy Network                                                 | .         | .         | .         | .         | .         | .         | .         | 3,500     |
| Dodge Jones Foundation           | Texas Public Policy Foundation                                       | .         | .         | 5,000     | .         | .         | .         | .         | 10,000    |
| Donors Trust/Donors Capital Fund | American Conservative Union Foundation                               | .         | 3,250     | 1,000     | 1,500     | 1,500     | 8,000     | 3,000     | 2,000     |
| Donors Trust/Donors Capital Fund | American Enterprise Institute for Public Policy Research             | 1,651,000 | 1,508,500 | 1,501,000 | 2,029,500 | 2,267,030 | 2,292,267 | 2,706,750 | 2,492,877 |
| Donors Trust/Donors Capital Fund | American Friends of the Institute of Economic Affairs                | .         | 84,150    | .         | 40,500    | .         | 40,000    | .         | .         |
| Donors Trust/Donors Capital Fund | American Legislative Exchange Council                                | .         | .         | .         | .         | .         | .         | 8,000     | 25,000    |
| Donors Trust/Donors Capital Fund | Americans for Prosperity Foundation                                  | .         | .         | 225,250   | 203,800   | 10,500    | 582,000   | 2,622,750 | 7,658,911 |
| Donors Trust/Donors Capital Fund | Atlas Economic Research Foundation                                   | 1,000     | 13,000    | 4,000     | 175,750   | 44,500    | 242,100   | 113,500   | 42,750    |
| Donors Trust/Donors Capital Fund | Capital Research Center                                              | 1,000     | 7,500     | 8,000     | 14,500    | 6,500     | 9,500     | 18,500    | 15,000    |
| Donors Trust/Donors Capital Fund | Cascade Policy Institute                                             | .         | .         | .         | .         | 20,000    | 275,600   | 423,000   | 335,000   |
| Donors Trust/Donors Capital Fund | Cato Institute                                                       | 2,500     | 194,120   | 165,600   | 146,250   | 335,850   | 315,121   | 127,450   | 113,783   |
| Donors Trust/Donors Capital Fund | Center for the Study of Carbon Dioxide and Global Change/CO2 Science | .         | .         | .         | .         | 125,000   | 129,400   | 29,400    | .         |
| Donors Trust/Donors Capital Fund | Committee for a Constructive Tomorrow                                | .         | .         | 5,000     | .         | 60,000    | 705,500   | 909,194   | 1,295,754 |
| Donors Trust/Donors Capital Fund | Competitive Enterprise Institute                                     | .         | 5,750     | 6,750     | 100,250   | 245,694   | 52,508    | 241,327   | 58,200    |
| Donors Trust/Donors Capital Fund | Free Enterprise Education Institute                                  | .         | .         | 125,340   | 305,847   | 156,500   | 75,000    | .         | .         |
| Donors Trust/Donors Capital Fund | FreedomWorks Foundation                                              | .         | .         | .         | 2,000     | 1,000     | 6,000     | 25,000    | 42,000    |
| Donors Trust/Donors Capital Fund | Frontiers of Freedom Institute                                       | .         | .         | .         | 50,000    | .         | .         | .         | .         |
| Donors Trust/Donors Capital Fund | Heartland Institute                                                  | .         | .         | 550,427   | 1,034,703 | 2,955,937 | 4,621,750 | 2,688,280 | 1,666,400 |
| Donors Trust/Donors Capital Fund | Heritage Foundation                                                  | 7,500     | 24,700    | 26,850    | 37,000    | 36,250    | 43,550    | 60,515    | 53,300    |
| Donors Trust/Donors Capital Fund | Hoover Institution on War, Revolution and Peace                      | .         | .         | .         | 10,000    | 1,000     | 1,500     | 11,500    | .         |
| Donors Trust/Donors Capital Fund | Hudson Institute                                                     | .         | 555,000   | 400,000   | 415,000   | 15,000    | 2,030,000 | 10,000    | 62,000    |
| Donors Trust/Donors Capital Fund | Independence Institute                                               | .         | .         | 200,000   | .         | 50,000    | 285,000   | 485,000   | 291,000   |
| Donors Trust/Donors Capital Fund | Independent Institute                                                | .         | .         | .         | .         | .         | 5,000     | .         | 1,500     |
| Donors Trust/Donors Capital Fund | Independent Womens Forum                                             | .         | 100       | .         | 5,000     | .         | 35,000    | 3,020,000 | 12,250    |

| Foundation                                              | Recipient                                                | 2003    | 2004    | 2005    | 2006    | 2007      | 2008      | 2009      | 2010      |
|---------------------------------------------------------|----------------------------------------------------------|---------|---------|---------|---------|-----------|-----------|-----------|-----------|
| Donors Trust/Donors Capital Fund                        | Institute for Energy Research                            | .       | .       | .       | .       | 65,000    | 300,000   | .         | 350,000   |
| Donors Trust/Donors Capital Fund                        | International Policy Network - U.S.                      | .       | 17,820  | .       | 27,500  | 15,000    | 40,000    | 46,500    | 449,850   |
| Donors Trust/Donors Capital Fund                        | James Madison Institute for Public Policy Studies        | .       | .       | 150,000 | 500     | 141,000   | 137,000   | 158,000   | 183,500   |
| Donors Trust/Donors Capital Fund                        | John Locke Foundation                                    | .       | .       | .       | 150     | 25,000    | 125,000   | 390,600   | 100,000   |
| Donors Trust/Donors Capital Fund                        | Landmark Legal Foundation                                | .       | 300     | .       | 100     | 100       | 5,000     | .         | 42,750    |
| Donors Trust/Donors Capital Fund                        | Manhattan Institute for Policy Research                  | .       | 71,000  | 50,000  | 74,500  | 114,500   | 153,295   | 281,475   | 232,000   |
| Donors Trust/Donors Capital Fund                        | Media Research Center                                    | 5,000   | 16,500  | 9,020   | 24,300  | 12,700    | 40,000    | 325,000   | 328,500   |
| Donors Trust/Donors Capital Fund                        | Mercatus Center                                          | 1,000   | 1,000   | 1,000   | 104,000 | 260,500   | 156,000   | 106,800   | 1,156,700 |
| Donors Trust/Donors Capital Fund                        | Mountain States Legal Foundation                         | .       | .       | 6,000   | 6,000   | 11,250    | 10,100    | 2,000     | 3,600     |
| Donors Trust/Donors Capital Fund                        | National Center for Policy Analysis                      | .       | 5,250   | .       | 15,000  | 105,650   | 53,000    | 285,000   | 63,000    |
| Donors Trust/Donors Capital Fund                        | National Center for Public Policy Research               | .       | .       | .       | 2,200   | .         | 9,000     | .         | 14,500    |
| Donors Trust/Donors Capital Fund                        | National Taxpayers Union                                 | .       | 1,000   | .       | .       | .         | .         | .         | .         |
| Donors Trust/Donors Capital Fund                        | National Taxpayers Union Foundation                      | .       | .       | .       | 2,500   | 504,250   | 13,600    | .         | 2,600     |
| Donors Trust/Donors Capital Fund                        | Pacific Research Institute for Public Policy             | .       | 6,000   | 7,000   | 64,500  | 200,000   | 115,001   | 570,000   | 204,500   |
| Donors Trust/Donors Capital Fund                        | Reason Foundation                                        | 1,000   | 4,500   | 132,500 | 35,500  | 104,250   | .         | 76,930    | 97,674    |
| Donors Trust/Donors Capital Fund                        | Responsible Resources                                    | .       | .       | .       | .       | 1,000,000 | .         | .         | .         |
| Donors Trust/Donors Capital Fund                        | State Policy Network                                     | 1,000   | 2,750   | 78,500  | 14,700  | 1,528,600 | 1,489,250 | 2,584,747 | 2,279,287 |
| Donors Trust/Donors Capital Fund                        | Texas Public Policy Foundation                           | .       | 500     | 200,250 | 49,500  | 152,500   | 455,500   | 930,000   | 677,508   |
| Donors Trust/Donors Capital Fund                        | Thomas Jefferson Institute for Public Policy             | .       | .       | .       | .       | 5,000     | 50,000    | 96,950    | 65,000    |
| Donors Trust/Donors Capital Fund                        | Washington Policy Center                                 | .       | .       | .       | .       | 20,000    | 105,200   | 180,000   | 189,575   |
| Dorothy D. and Joseph A. Moller Foundation              | Capital Research Center                                  | 5,000   | .       | 7,500   | 7,500   | .         | .         | .         | .         |
| Dorothy D. and Joseph A. Moller Foundation              | Center for the Defense of Free Enterprise                | 5,000   | .       | .       | .       | .         | .         | .         | .         |
| Dorothy D. and Joseph A. Moller Foundation              | Heritage Foundation                                      | .       | 120,000 | .       | 120,000 | .         | .         | .         | .         |
| Dorothy D. and Joseph A. Moller Foundation              | Media Research Center                                    | 10,000  | 40,000  | .       | .       | 15,000    | 72,000    | 61,500    | 72,000    |
| Dorothy D. and Joseph A. Moller Foundation              | National Center for Policy Analysis                      | 5,000   | .       | .       | .       | .         | .         | .         | .         |
| Douglas & Maria DeVos Foundation                        | American Enterprise Institute for Public Policy Research | .       | .       | 5,000   | .       | .         | .         | 500,000   | 500,000   |
| Douglas & Maria DeVos Foundation                        | Heritage Foundation                                      | .       | .       | 25,000  | 25,000  | .         | 25,000    | 25,000    | .         |
| Dunn's Foundation for the Advancement of Right Thinking | American Enterprise Institute for Public Policy Research | 25,000  | 25,000  | .       | 65,000  | 32,000    | .         | .         | .         |
| Dunn's Foundation for the Advancement of Right Thinking | Atlas Economic Research Foundation                       | .       | .       | .       | .       | .         | .         | .         | 30,000    |
| Dunn's Foundation for the Advancement of Right Thinking | Cato Institute                                           | 185,000 | 100,000 | 100,000 | 290,000 | 325,000   | 325,000   | 750,000   | 250,000   |
| Dunn's Foundation for the Advancement of Right Thinking | Committee for a Constructive Tomorrow                    | .       | .       | .       | .       | .         | .         | .         | 10,000    |
| Dunn's Foundation for the Advancement of Right Thinking | Competitive Enterprise Institute                         | 445,000 | 500,000 | 500,000 | 455,000 | 545,000   | 545,000   | 815,000   | 505,000   |
| Dunn's Foundation for the Advancement of Right Thinking | Consumer Alert                                           | .       | 10,000  | 10,000  | .       | .         | .         | .         | .         |

| Foundation                                              | Recipient                                                | 2003    | 2004    | 2005    | 2006    | 2007    | 2008    | 2009    | 2010    |
|---------------------------------------------------------|----------------------------------------------------------|---------|---------|---------|---------|---------|---------|---------|---------|
| Dunn's Foundation for the Advancement of Right Thinking | FreedomWorks Foundation                                  | .       | .       | .       | .       | .       | .       | .       | 130,000 |
| Dunn's Foundation for the Advancement of Right Thinking | George C. Marshall Institute                             | 20,000  | 5,000   | .       | 20,000  | .       | .       | .       | .       |
| Dunn's Foundation for the Advancement of Right Thinking | Heartland Institute                                      | .       | .       | .       | .       | .       | .       | 50,000  | .       |
| Dunn's Foundation for the Advancement of Right Thinking | James Madison Institute for Public Policy Studies        | 20,000  | 25,000  | .       | 35,000  | 10,000  | 10,000  | 30,000  | 40,000  |
| Dunn's Foundation for the Advancement of Right Thinking | Landmark Legal Foundation                                | 370,000 | 350,000 | 350,000 | 260,000 | 120,000 | 120,000 | 200,000 | 100,000 |
| Dunn's Foundation for the Advancement of Right Thinking | National Center for Policy Analysis                      | .       | 20,000  | 20,000  | .       | 10,000  | 10,000  | 17,000  | .       |
| Dunn's Foundation for the Advancement of Right Thinking | National Center for Public Policy Research               | .       | .       | .       | .       | .       | .       | .       | 20,000  |
| Dunn's Foundation for the Advancement of Right Thinking | National Taxpayers Union                                 | .       | .       | .       | .       | .       | .       | .       | 10,000  |
| Dunn's Foundation for the Advancement of Right Thinking | Reason Foundation                                        | 308,000 | 450,000 | 450,000 | 455,000 | 540,000 | 540,000 | 930,000 | 800,000 |
| E. A. Morris Charitable Foundation                      | Americans for Prosperity Foundation                      | .       | 25,000  | 12,500  | .       | 5,000   | 5,000   | 2,500   | 2,500   |
| E. A. Morris Charitable Foundation                      | John Locke Foundation                                    | 50,000  | 55,000  | 100,000 | 150,000 | .       | .       | .       | .       |
| E. A. Morris Charitable Foundation                      | National Taxpayers Union Foundation                      | 35,000  | 75,000  | 45,000  | 50,000  | 60,000  | 20,000  | 10,000  | .       |
| Earhart Foundation                                      | American Enterprise Institute for Public Policy Research | 50,000  | 100,000 | 100,000 | 100,000 | 100,000 | 90,000  | 30,000  | .       |
| Earhart Foundation                                      | Atlas Economic Research Foundation                       | 317,012 | 458,885 | 831,655 | 221,500 | 296,377 | 266,100 | 137,321 | 82,964  |
| Earhart Foundation                                      | Capital Research Center                                  | 10,000  | 25,000  | 12,500  | .       | .       | .       | .       | .       |
| Earhart Foundation                                      | Cato Institute                                           | 50,500  | 30,000  | 30,000  | 82,000  | 53,000  | 86,000  | 67,500  | 31,225  |
| Earhart Foundation                                      | Competitive Enterprise Institute                         | .       | 25,000  | 30,000  | .       | .       | 10,000  | 22,500  | 12,500  |
| Earhart Foundation                                      | Environmental Literacy Council                           | 15,000  | .       | 25,000  | .       | .       | .       | .       | .       |
| Earhart Foundation                                      | George C. Marshall Institute                             | 25,000  | 25,000  | 55,000  | 55,000  | 40,000  | 40,000  | 30,000  | 30,000  |
| Earhart Foundation                                      | Heritage Foundation                                      | .       | .       | .       | .       | 10,000  | .       | 10,000  | .       |
| Earhart Foundation                                      | Hoover Institution on War, Revolution and Peace          | 103,000 | .       | 35,000  | .       | 95,000  | 86,720  | .       | .       |
| Earhart Foundation                                      | Hudson Institute                                         | .       | .       | .       | 20,000  | .       | 20,000  | 15,000  | 20,000  |
| Earhart Foundation                                      | Independent Institute                                    | 12,000  | 15,000  | 35,000  | 15,000  | .       | .       | .       | .       |
| Earhart Foundation                                      | Independent Womens Forum                                 | .       | 15,000  | .       | .       | .       | .       | .       | .       |
| Earhart Foundation                                      | International Policy Network - U.S.                      | .       | .       | 33,000  | .       | 7,500   | 25,000  | .       | .       |
| Earhart Foundation                                      | John Locke Foundation                                    | .       | .       | .       | .       | 11,500  | .       | .       | .       |
| Earhart Foundation                                      | Manhattan Institute for Policy Research                  | 60,000  | 45,000  | 75,000  | 50,000  | .       | 20,000  | 25,000  | .       |
| Earhart Foundation                                      | Mercatus Center                                          | .       | .       | .       | .       | 20,000  | .       | .       | .       |
| Earhart Foundation                                      | National Center for Policy Analysis                      | 25,000  | 25,000  | 40,000  | .       | .       | .       | .       | .       |
| Earhart Foundation                                      | Pacific Research Institute for Public Policy             | 20,000  | .       | .       | 25,000  | 25,000  | 25,000  | 20,000  | 25,000  |
| Ed Foundation                                           | Atlas Economic Research Foundation                       | .       | .       | .       | 50,000  | .       | .       | .       | .       |
| Ed Foundation                                           | Cato Institute                                           | 5,000   | 5,000   | .       | 50,000  | .       | 5,000   | .       | .       |

| Foundation                       | Recipient                                                | 2003   | 2004    | 2005    | 2006    | 2007    | 2008    | 2009    | 2010    |
|----------------------------------|----------------------------------------------------------|--------|---------|---------|---------|---------|---------|---------|---------|
| Ed Foundation                    | FreedomWorks Foundation                                  | .      | .       | .       | .       | .       | 50,000  | 50,000  | .       |
| Ed Foundation                    | Heritage Foundation                                      | .      | 5,000   | .       | 50,000  | .       | 10,000  | .       | .       |
| Ed Foundation                    | Independent Institute                                    | .      | .       | .       | 5,000   | .       | .       | .       | .       |
| Ed Foundation                    | National Center for Policy Analysis                      | .      | .       | .       | .       | .       | .       | 25,000  | .       |
| Ed Foundation                    | State Policy Network                                     | .      | .       | .       | .       | .       | 50,000  | .       | .       |
| Ed Foundation                    | Texas Public Policy Foundation                           | 10,000 | 10,000  | 10,000  | 129,000 | 91,000  | 172,000 | 92,000  | 200,495 |
| Ed Uihlein Family Foundation     | Americans for Prosperity Foundation                      | .      | .       | .       | .       | .       | .       | .       | 25,000  |
| Ed Uihlein Family Foundation     | Heartland Institute                                      | .      | .       | .       | .       | .       | .       | .       | 1,000   |
| Ed Uihlein Family Foundation     | Heritage Foundation                                      | .      | .       | .       | .       | .       | 25,000  | .       | 20,000  |
| Ed Uihlein Family Foundation     | Media Research Center                                    | .      | .       | .       | .       | .       | .       | 250,000 | 300,000 |
| Eli Lilly and Company Foundation | American Enterprise Institute for Public Policy Research | 30,000 | 40,000  | 40,000  | 40,000  | 40,000  | 20,000  | 25,000  | 25,000  |
| Eli Lilly and Company Foundation | Annapolis Center for Science-Based Public Policy         | .      | .       | 10,000  | 8,000   | .       | .       | .       | .       |
| Eli Lilly and Company Foundation | Atlas Economic Research Foundation                       | .      | .       | .       | 15,000  | .       | .       | .       | .       |
| Eli Lilly and Company Foundation | Competitive Enterprise Institute                         | .      | .       | .       | .       | .       | 30,000  | 10,000  | .       |
| Eli Lilly and Company Foundation | Heartland Institute                                      | .      | 15,000  | 15,000  | 15,000  | 20,000  | .       | .       | .       |
| Eli Lilly and Company Foundation | Heritage Foundation                                      | 10,000 | 10,000  | 10,000  | 10,000  | 20,000  | 10,000  | .       | .       |
| Eli Lilly and Company Foundation | Hoover Institution on War, Revolution and Peace          | .      | .       | .       | .       | 20,000  | 10,000  | 10,000  | .       |
| Eli Lilly and Company Foundation | Hudson Institute                                         | 15,000 | .       | .       | .       | .       | .       | .       | .       |
| Eli Lilly and Company Foundation | Independence Institute                                   | .      | .       | 5,000   | 2,500   | .       | .       | .       | .       |
| Eli Lilly and Company Foundation | International Policy Network - U.S.                      | .      | 25,000  | 15,000  | .       | .       | .       | .       | .       |
| Eli Lilly and Company Foundation | Manhattan Institute for Policy Research                  | 15,000 | 30,000  | 30,000  | 10,000  | 10,000  | .       | .       | .       |
| Eli Lilly and Company Foundation | National Center for Policy Analysis                      | 10,000 | 10,000  | .       | .       | .       | .       | .       | .       |
| Eli Lilly and Company Foundation | Pacific Research Institute for Public Policy             | 5,000  | 10,000  | 20,000  | 20,000  | 30,000  | 35,000  | 40,000  | 30,000  |
| Eli Lilly and Company Foundation | State Policy Network                                     | .      | .       | 15,000  | 15,000  | .       | .       | .       | .       |
| Ewing Marion Kauffman Foundation | American Enterprise Institute for Public Policy Research | .      | 175,000 | .       | .       | 830,000 | .       | 25,000  | 80,400  |
| Ewing Marion Kauffman Foundation | Competitive Enterprise Institute                         | .      | .       | .       | 132,500 | .       | .       | .       | .       |
| Ewing Marion Kauffman Foundation | Heritage Foundation                                      | .      | .       | .       | .       | 40,000  | .       | .       | .       |
| Ewing Marion Kauffman Foundation | Hoover Institution on War, Revolution and Peace          | .      | .       | .       | .       | .       | .       | 25,000  | .       |
| Ewing Marion Kauffman Foundation | Hudson Institute                                         | .      | .       | 250,000 | .       | 250,000 | .       | .       | .       |
| Ewing Marion Kauffman Foundation | Manhattan Institute for Policy Research                  | .      | .       | 634,750 | .       | 500,000 | .       | 300,000 | .       |
| Ewing Marion Kauffman Foundation | National Center for Policy Analysis                      | .      | .       | .       | .       | .       | 200,000 | .       | 200,000 |
| Ewing Marion Kauffman Foundation | Pacific Research Institute for Public Policy             | .      | .       | .       | .       | 50,000  | 25,000  | 75,000  | 75,000  |
| ExxonMobil Foundation            | Advancement of Sound Science Center                      | 10,000 | 10,000  | .       | .       | .       | .       | .       | .       |

| Foundation            | Recipient                                                            | 2003    | 2004    | 2005    | 2006    | 2007   | 2008   | 2009 | 2010 |
|-----------------------|----------------------------------------------------------------------|---------|---------|---------|---------|--------|--------|------|------|
| ExxonMobil Foundation | American Conservative Union Foundation                               | .       | .       | 50,000  | .       | .      | .      | .    | .    |
| ExxonMobil Foundation | American Council for Capital Formation                               | 145,000 | .       | .       | .       | .      | .      | .    | .    |
| ExxonMobil Foundation | American Council for Capital Formation Center for Policy Research    | .       | 255,000 | 360,000 | .       | .      | .      | .    | .    |
| ExxonMobil Foundation | American Enterprise Institute for Public Policy Research             | 225,000 | 225,000 | 235,000 | .       | .      | .      | .    | .    |
| ExxonMobil Foundation | American Friends of the Institute of Economic Affairs                | .       | 50,000  | .       | .       | .      | .      | .    | .    |
| ExxonMobil Foundation | American Legislative Exchange Council                                | 290,000 | 167,000 | 151,500 | 30,000  | 31,000 | .      | .    | .    |
| ExxonMobil Foundation | Annapolis Center for Science-Based Public Policy                     | 50,000  | 75,000  | 80,000  | 75,000  | .      | .      | .    | .    |
| ExxonMobil Foundation | Atlas Economic Research Foundation                                   | 190,000 | 75,000  | 100,000 | 100,000 | .      | .      | .    | .    |
| ExxonMobil Foundation | Capital Research Center                                              | 25,000  | 25,000  | 50,000  | .       | .      | .      | .    | .    |
| ExxonMobil Foundation | Cato Institute                                                       | 25,000  | 15,000  | .       | .       | .      | .      | .    | .    |
| ExxonMobil Foundation | Center for the Defense of Free Enterprise                            | 40,000  | 130,000 | 60,000  | .       | .      | .      | .    | .    |
| ExxonMobil Foundation | Center for the Study of Carbon Dioxide and Global Change/CO2 Science | 40,000  | .       | 25,000  | .       | .      | .      | .    | .    |
| ExxonMobil Foundation | Committee for a Constructive Tomorrow                                | 72,000  | 125,000 | 90,000  | 70,000  | .      | .      | .    | .    |
| ExxonMobil Foundation | Competitive Enterprise Institute                                     | 440,000 | 270,000 | 90,000  | .       | .      | .      | .    | .    |
| ExxonMobil Foundation | Congress of Racial Equality                                          | 40,000  | 135,000 | 75,000  | .       | .      | .      | .    | .    |
| ExxonMobil Foundation | Consumer Alert                                                       | 15,000  | 25,000  | .       | .       | .      | .      | .    | .    |
| ExxonMobil Foundation | Environmental Literacy Council                                       | 40,000  | 40,000  | 75,000  | .       | 25,000 | 40,000 | .    | .    |
| ExxonMobil Foundation | Free Enterprise Education Institute                                  | 50,000  | 10,000  | 70,000  | .       | .      | .      | .    | .    |
| ExxonMobil Foundation | George C. Marshall Institute                                         | 95,000  | 145,000 | 90,000  | .       | .      | .      | .    | .    |
| ExxonMobil Foundation | Heartland Institute                                                  | 85,000  | 90,000  | 29,000  | 90,000  | .      | .      | .    | .    |
| ExxonMobil Foundation | Heritage Foundation                                                  | 95,000  | .       | 30,000  | .       | .      | .      | .    | .    |
| ExxonMobil Foundation | Hoover Institution on War, Revolution and Peace                      | 30,000  | .       | 20,000  | .       | .      | .      | .    | .    |
| ExxonMobil Foundation | Hudson Institute                                                     | .       | .       | 10,000  | .       | .      | .      | .    | .    |
| ExxonMobil Foundation | Independent Institute                                                | 10,000  | .       | 30,000  | .       | .      | .      | .    | .    |
| ExxonMobil Foundation | Independent Womens Forum                                             | 15,000  | .       | 15,000  | .       | .      | .      | .    | .    |
| ExxonMobil Foundation | International Policy Network - U.S.                                  | 50,000  | .       | .       | .       | .      | .      | .    | .    |
| ExxonMobil Foundation | Landmark Legal Foundation                                            | 10,000  | 10,000  | 10,000  | 10,000  | 10,000 | .      | .    | .    |
| ExxonMobil Foundation | Manhattan Institute for Policy Research                              | 25,000  | .       | .       | .       | .      | .      | .    | .    |
| ExxonMobil Foundation | Media Research Center                                                | 50,000  | 50,000  | 50,000  | 52,500  | .      | .      | .    | .    |
| ExxonMobil Foundation | Mountain States Legal Foundation                                     | .       | .       | 2,500   | 2,500   | 5,000  | .      | .    | .    |
| ExxonMobil Foundation | National Center for Policy Analysis                                  | 75,000  | 75,000  | 75,000  | .       | .      | .      | .    | .    |
| ExxonMobil Foundation | National Center for Public Policy Research                           | 55,000  | 55,000  | 55,000  | .       | .      | .      | .    | .    |
| ExxonMobil Foundation | National Taxpayers Union Foundation                                  | .       | .       | 70,000  | .       | .      | .      | .    | .    |

| Foundation                         | Recipient                                                         | 2003    | 2004    | 2005    | 2006    | 2007    | 2008    | 2009    | 2010      |
|------------------------------------|-------------------------------------------------------------------|---------|---------|---------|---------|---------|---------|---------|-----------|
| ExxonMobil Foundation              | Pacific Research Institute for Public Policy                      | 45,000  | 100,000 | 95,000  | .       | .       | .       | .       | .         |
| ExxonMobil Foundation              | Reason Foundation                                                 | 10,000  | .       | 20,000  | .       | .       | .       | .       | .         |
| F. M. Kirby Foundation, Inc.       | American Enterprise Institute for Public Policy Research          | 15,000  | 18,000  | 18,000  | 18,000  | 25,000  | 30,000  | 30,000  | 35,000    |
| F. M. Kirby Foundation, Inc.       | Americans for Prosperity Foundation                               | 25,000  | .       | .       | .       | .       | .       | .       | .         |
| F. M. Kirby Foundation, Inc.       | Capital Research Center                                           | 7,500   | 10,000  | 10,000  | 10,000  | 12,500  | 12,500  | .       | .         |
| F. M. Kirby Foundation, Inc.       | Cato Institute                                                    | 22,500  | 22,500  | 25,000  | 25,000  | 27,500  | 27,500  | 30,000  | 30,000    |
| F. M. Kirby Foundation, Inc.       | Heritage Foundation                                               | 110,000 | 110,000 | 110,000 | 110,000 | 120,000 | 120,000 | 120,000 | 120,000   |
| F. M. Kirby Foundation, Inc.       | Hudson Institute                                                  | 17,500  | 17,500  | 20,000  | 20,000  | 22,500  | 22,500  | 22,500  | 25,000    |
| F. M. Kirby Foundation, Inc.       | Landmark Legal Foundation                                         | 45,000  | 45,000  | 45,000  | 45,000  | 45,000  | 45,000  | 5,000   | 25,000    |
| F. M. Kirby Foundation, Inc.       | Manhattan Institute for Policy Research                           | 30,000  | 37,500  | 37,500  | 37,500  | 250,000 | 75,000  | 75,000  | 75,000    |
| F. M. Kirby Foundation, Inc.       | Media Research Center                                             | 35,000  | 35,000  | 35,000  | 35,000  | 40,000  | 40,000  | 35,000  | 40,000    |
| Foundation to Promote Open Society | Cato Institute                                                    | .       | .       | .       | .       | .       | .       | .       | 80,000    |
| Foundation to Promote Open Society | Hudson Institute                                                  | .       | .       | .       | .       | .       | .       | 92,500  | 125,000   |
| Galashiels Fund, Ltd.              | Cato Institute                                                    | .       | 100,000 | 110,000 | 120,000 | 240,000 | 125,000 | 130,000 | 1,130,000 |
| Galashiels Fund, Ltd.              | FreedomWorks                                                      | .       | .       | 25,000  | 50,000  | .       | .       | .       | .         |
| Galashiels Fund, Ltd.              | FreedomWorks Foundation                                           | .       | .       | .       | .       | 110,000 | .       | .       | .         |
| Galashiels Fund, Ltd.              | Independent Institute                                             | .       | 6,000   | .       | 7,000   | .       | .       | .       | .         |
| General Motors Foundation, Inc.    | American Council for Capital Formation Center for Policy Research | 25,000  | 60,000  | 45,000  | .       | 10,000  | 10,000  | .       | .         |
| General Motors Foundation, Inc.    | American Enterprise Institute for Public Policy Research          | 100,000 | 100,000 | 50,000  | 25,000  | 25,000  | 25,000  | .       | .         |
| General Motors Foundation, Inc.    | American Legislative Exchange Council                             | 25,000  | 95,000  | 25,000  | .       | .       | .       | .       | .         |
| General Motors Foundation, Inc.    | Annapolis Center for Science-Based Public Policy                  | 25,000  | 20,000  | 25,000  | 20,000  | 20,000  | 20,000  | .       | .         |
| General Motors Foundation, Inc.    | Cato Institute                                                    | 25,000  | 25,000  | 25,000  | 20,000  | 25,000  | .       | .       | .         |
| General Motors Foundation, Inc.    | Committee for a Constructive Tomorrow                             | 25,000  | .       | .       | .       | .       | .       | .       | .         |
| General Motors Foundation, Inc.    | Competitive Enterprise Institute                                  | 115,000 | 50,000  | 65,000  | 15,000  | 25,000  | 25,000  | .       | .         |
| General Motors Foundation, Inc.    | Consumer Alert                                                    | 25,000  | 40,000  | .       | .       | .       | .       | .       | .         |
| General Motors Foundation, Inc.    | George C. Marshall Institute                                      | 10,000  | 10,000  | .       | .       | .       | .       | .       | .         |
| General Motors Foundation, Inc.    | Heartland Institute                                               | 40,000  | 50,000  | 25,000  | 25,000  | 25,000  | 25,000  | .       | 15,000    |
| General Motors Foundation, Inc.    | Heritage Foundation                                               | 25,000  | 25,000  | 25,000  | .       | 25,000  | .       | .       | .         |
| General Motors Foundation, Inc.    | Hoover Institution on War, Revolution and Peace                   | 40,000  | .       | .       | .       | .       | .       | .       | .         |
| General Motors Foundation, Inc.    | Independent Institute                                             | 10,000  | .       | 7,500   | .       | 7,500   | .       | .       | .         |
| General Motors Foundation, Inc.    | Mercatus Center                                                   | 30,000  | 30,000  | 15,000  | 20,000  | 20,000  | 25,000  | .       | .         |
| General Motors Foundation, Inc.    | National Center for Policy Analysis                               | 30,000  | 30,000  | .       | .       | .       | .       | .       | .         |
| General Motors Foundation, Inc.    | Reason Foundation                                                 | 25,000  | 25,000  | .       | 10,000  | 15,000  | .       | .       | .         |

| Foundation                                                    | Recipient                                                         | 2003    | 2004    | 2005      | 2006    | 2007    | 2008    | 2009      | 2010    |
|---------------------------------------------------------------|-------------------------------------------------------------------|---------|---------|-----------|---------|---------|---------|-----------|---------|
| Gilder Foundation, Inc.                                       | Cato Institute                                                    | 50,000  | 50,000  | 50,000    | 15,000  | .       | .       | .         | .       |
| Gilder Foundation, Inc.                                       | Independent Womens Forum                                          | 50,000  | .       | .         | .       | .       | .       | .         | .       |
| Gilder Foundation, Inc.                                       | International Policy Network - U.S.                               | 10,000  | .       | .         | .       | .       | .       | .         | .       |
| Gilder Foundation, Inc.                                       | Landmark Legal Foundation                                         | .       | 5,000   | 5,000     | .       | .       | .       | .         | .       |
| Gilder Foundation, Inc.                                       | Manhattan Institute for Policy Research                           | .       | .       | .         | 50,000  | 60,000  | 60,000  | 10,000    | 60,000  |
| Gilder Foundation, Inc.                                       | Media Research Center                                             | 1,500   | .       | .         | .       | .       | .       | .         | 250     |
| Gilder Foundation, Inc.                                       | National Center for Policy Analysis                               | 20,000  | 150,000 | .         | .       | .       | .       | .         | .       |
| Gilder Foundation, Inc.                                       | Reason Foundation                                                 | .       | 2,500   | .         | .       | .       | .       | .         | .       |
| Gordon V. & Helen C. Smith Foundation                         | Cato Institute                                                    | 25,000  | .       | .         | 125,000 | .       | .       | .         | 100,000 |
| Gordon V. & Helen C. Smith Foundation                         | Heritage Foundation                                               | 10,000  | .       | .         | 250,000 | .       | .       | .         | 200,000 |
| Greater Kansas City Community Foundation                      | American Council for Capital Formation Center for Policy Research | .       | .       | .         | .       | .       | .       | 100,000   | .       |
| Greater Kansas City Community Foundation                      | Cato Institute                                                    | .       | .       | .         | 5,100   | 7,000   | .       | 10,000    | 5,100   |
| Greater Kansas City Community Foundation                      | Committee for a Constructive Tomorrow                             | .       | .       | .         | .       | .       | 1,000   | 1,000     | .       |
| Greater Kansas City Community Foundation                      | Heritage Foundation                                               | .       | .       | .         | .       | 4,300   | 7,300   | 21,500    | 7,850   |
| Greater Kansas City Community Foundation                      | Institute for Energy Research                                     | .       | .       | .         | .       | .       | .       | 150,000   | .       |
| H. Smith Richardson Charitable Trust                          | American Enterprise Institute for Public Policy Research          | 50,000  | .       | .         | 161,280 | .       | .       | .         | 150,000 |
| H. Smith Richardson Charitable Trust                          | Atlas Economic Research Foundation                                | .       | .       | .         | .       | 250,000 | .       | .         | .       |
| H. Smith Richardson Charitable Trust                          | FreedomWorks                                                      | 5,000   | .       | .         | .       | .       | .       | .         | .       |
| H. Smith Richardson Charitable Trust                          | George C. Marshall Institute                                      | .       | .       | 248,570   | .       | .       | .       | .         | .       |
| H. Smith Richardson Charitable Trust                          | Hudson Institute                                                  | .       | .       | 100,000   | 400,000 | 125,000 | .       | .         | 150,000 |
| H. Smith Richardson Charitable Trust                          | Independent Womens Forum                                          | 150,000 | .       | .         | .       | .       | .       | .         | .       |
| H. Smith Richardson Charitable Trust                          | Manhattan Institute for Policy Research                           | .       | .       | .         | 159,115 | .       | .       | .         | .       |
| Hatton W. Sumners Found for the Study & Teaching of Self-Govt | National Center for Policy Analysis                               | 455,000 | 300,000 | 391,305   | 390,000 | 54,000  | 404,700 | 389,895   | .       |
| Hatton W. Sumners Found for the Study & Teaching of Self-Govt | Oklahoma Council of Public Affairs                                | .       | 100,000 | .         | .       | .       | .       | .         | .       |
| Henry R. Kravis Foundation, Inc.                              | American Enterprise Institute for Public Policy Research          | .       | .       | .         | 100,000 | .       | 50,000  | 50,000    | .       |
| Henry R. Kravis Foundation, Inc.                              | Hudson Institute                                                  | 75,000  | 50,000  | .         | .       | 100,000 | 150,000 | 50,000    | 50,000  |
| Henry R. Kravis Foundation, Inc.                              | Manhattan Institute for Policy Research                           | .       | 10,000  | .         | .       | .       | .       | .         | .       |
| Herrick Foundation                                            | Cato Institute                                                    | .       | .       | 50,000    | 50,000  | 114,050 | 150,000 | .         | 75,000  |
| Herrick Foundation                                            | Heritage Foundation                                               | 500,000 | 250,000 | 2,000,000 | 500,000 | 430,000 | 350,000 | 1,000,000 | 250,000 |
| Hilton Family Foundation                                      | American Conservative Union Foundation                            | 1,000   | .       | .         | .       | .       | .       | .         | .       |
| Hilton Family Foundation                                      | Cato Institute                                                    | 25,000  | .       | 35,000    | .       | 35,000  | .       | .         | 10,000  |
| Hilton Family Foundation                                      | Committee for a Constructive Tomorrow                             | .       | .       | .         | .       | .       | .       | 1,000     | .       |
| Hilton Family Foundation                                      | Heritage Foundation                                               | 2,619   | .       | .         | 2,500   | .       | .       | .         | 2,500   |



| Foundation                   | Recipient                                         | 2003   | 2004    | 2005    | 2006      | 2007      | 2008      | 2009      | 2010      |
|------------------------------|---------------------------------------------------|--------|---------|---------|-----------|-----------|-----------|-----------|-----------|
| Hilton Family Foundation     | Independent Institute                             | .      | .       | .       | 5,000     | .         | .         | 5,000     | .         |
| Hilton Family Foundation     | James Madison Institute for Public Policy Studies | 35,000 | 40,000  | .       | 15,000    | 15,000    | .         | .         | 500,000   |
| Hilton Family Foundation     | Media Research Center                             | 500    | 500     | .       | 500       | .         | .         | .         | .         |
| Hilton Family Foundation     | Mercatus Center                                   | 1,000  | .       | .       | 5,000     | 6,300     | .         | .         | 5,000     |
| Hilton Family Foundation     | National Taxpayers Union                          | 5,000  | .       | 5,000   | .         | .         | .         | .         | .         |
| Hilton Family Foundation     | Reason Foundation                                 | 2,500  | .       | 5,000   | 5,000     | 2,500     | .         | .         | 2,500     |
| Hilton Family Foundation     | Southeastern Legal Foundation                     | 5,000  | .       | .       | .         | .         | .         | .         | .         |
| Hilton Family Foundation     | State Policy Network                              | .      | .       | .       | .         | .         | .         | 10,000    | .         |
| Hirsch Family Foundation     | National Center for Policy Analysis               | .      | .       | 144,000 | 325,926   | 478,591   | .         | .         | .         |
| Howard Charitable Foundation | Heritage Foundation                               | .      | .       | .       | 5,000,000 | 5,000,000 | 5,000,000 | 1,000,000 | 1,000,000 |
| Howard Charitable Foundation | Hoover Institution on War, Revolution and Peace   | .      | .       | .       | 5,000,000 | 1,000,000 | 1,000,000 | 250,000   | 500,000   |
| Iowa West Foundation         | Independent Womens Forum                          | .      | 500,000 | .       | .         | .         | .         | .         | .         |
| J. P. Humphreys Foundation   | Americans for Prosperity Foundation               | .      | .       | .       | 50,000    | 50,000    | .         | .         | .         |
| J. P. Humphreys Foundation   | Atlas Economic Research Foundation                | 15,000 | 10,000  | 15,000  | 10,000    | 10,000    | 15,000    | .         | 65,000    |
| J. P. Humphreys Foundation   | Capital Research Center                           | 10,000 | 10,000  | .       | 12,500    | .         | 5,000     | 5,000     | 5,000     |
| J. P. Humphreys Foundation   | Cato Institute                                    | .      | .       | .       | 10,000    | 28,800    | .         | .         | .         |
| J. P. Humphreys Foundation   | Competitive Enterprise Institute                  | 40,000 | .       | 20,000  | 25,000    | 25,000    | 40,000    | .         | .         |
| J. P. Humphreys Foundation   | Heartland Institute                               | 5,000  | 1,000   | .       | .         | .         | 5,000     | 5,000     | 5,000     |
| J. P. Humphreys Foundation   | Landmark Legal Foundation                         | .      | .       | .       | .         | 10,000    | .         | .         | .         |
| J. P. Humphreys Foundation   | Manhattan Institute for Policy Research           | 25,000 | .       | .       | .         | .         | .         | .         | .         |
| J. P. Humphreys Foundation   | Mercatus Center                                   | .      | 20,000  | .       | .         | .         | 25,000    | .         | .         |
| J. P. Humphreys Foundation   | Reason Foundation                                 | 15,000 | 25,000  | .       | .         | 25,000    | 50,000    | .         | .         |
| J. P. Humphreys Foundation   | State Policy Network                              | .      | 5,000   | .       | .         | 5,000     | .         | 5,000     | 5,000     |
| Jaquelin Hume Foundation     | American Legislative Exchange Council             | 25,000 | 25,000  | .       | .         | .         | 25,000    | 45,000    | 50,000    |
| Jaquelin Hume Foundation     | Americans for Prosperity Foundation               | .      | .       | .       | .         | .         | 25,000    | .         | .         |
| Jaquelin Hume Foundation     | Capital Research Center                           | 5,000  | 5,000   | .       | .         | .         | .         | .         | .         |
| Jaquelin Hume Foundation     | Cascade Policy Institute                          | 25,000 | 25,000  | .       | 25,000    | 25,000    | 25,000    | 30,000    | 50,000    |
| Jaquelin Hume Foundation     | Heartland Institute                               | 25,000 | .       | .       | 25,000    | .         | .         | 10,000    | 25,000    |
| Jaquelin Hume Foundation     | Heritage Foundation                               | 50,000 | 75,000  | 75,000  | .         | 50,000    | 500,000   | 500,000   | 250,000   |
| Jaquelin Hume Foundation     | Hoover Institution on War, Revolution and Peace   | .      | .       | .       | .         | .         | .         | .         | 100,000   |
| Jaquelin Hume Foundation     | Independence Institute                            | 50,000 | 81,250  | .       | 73,309    | 50,000    | 50,000    | 50,000    | 50,000    |
| Jaquelin Hume Foundation     | Independent Womens Forum                          | 35,000 | 35,000  | .       | 35,000    | 25,000    | 35,000    | 15,000    | .         |
| Jaquelin Hume Foundation     | James Madison Institute for Public Policy Studies | .      | .       | .       | .         | 31,850    | 41,462    | 44,667    | .         |

| Foundation                             | Recipient                                                | 2003      | 2004      | 2005    | 2006      | 2007    | 2008    | 2009    | 2010      |
|----------------------------------------|----------------------------------------------------------|-----------|-----------|---------|-----------|---------|---------|---------|-----------|
| Jaquelin Hume Foundation               | John Locke Foundation                                    | 25,000    | 30,000    | .       | 30,000    | 25,000  | 25,000  | 15,000  | .         |
| Jaquelin Hume Foundation               | Landmark Legal Foundation                                | .         | .         | 150,000 | 150,000   | 50,000  | .       | .       | .         |
| Jaquelin Hume Foundation               | Manhattan Institute for Policy Research                  | 100,000   | .         | 100,000 | 100,000   | 50,000  | 50,000  | 50,000  | 50,000    |
| Jaquelin Hume Foundation               | Oklahoma Council of Public Affairs                       | .         | .         | .       | 20,000    | .       | .       | 15,000  | .         |
| Jaquelin Hume Foundation               | Pacific Research Institute for Public Policy             | 60,000    | 75,000    | .       | 75,000    | 60,000  | 60,000  | 60,000  | 75,000    |
| Jaquelin Hume Foundation               | Reason Foundation                                        | .         | 25,000    | .       | .         | 30,000  | 30,000  | .       | 10,000    |
| Jaquelin Hume Foundation               | State Policy Network                                     | 50,000    | 50,000    | .       | 75,000    | 75,000  | 75,000  | 75,000  | 100,000   |
| Jaquelin Hume Foundation               | Texas Public Policy Foundation                           | 25,000    | 41,420    | .       | 57,937    | 35,000  | 35,000  | 35,000  | 40,000    |
| Jaquelin Hume Foundation               | Thomas Jefferson Institute for Public Policy             | 25,000    | 25,000    | 25,000  | 25,000    | .       | .       | 25,000  | 25,000    |
| Jaquelin Hume Foundation               | Washington Policy Center                                 | .         | .         | .       | 10,000    | 10,000  | 10,000  | 15,000  | 20,000    |
| John Dawson Foundation                 | Americans for Prosperity Foundation                      | .         | .         | .       | .         | .       | .       | 250,000 | .         |
| John Dawson Foundation                 | Cato Institute                                           | 50,000    | 50,000    | 25,000  | .         | .       | 50,000  | .       | .         |
| John Dawson Foundation                 | Heritage Foundation                                      | 100,000   | 100,400   | 100,000 | .         | 100,000 | 100,000 | 100,000 | .         |
| John Dawson Foundation                 | State Policy Network                                     | .         | .         | .       | .         | .       | .       | .       | 25,000    |
| John S. and James L. Knight Foundation | American Enterprise Institute for Public Policy Research | .         | 55,000    | 800,000 | .         | .       | .       | .       | 98,500    |
| John S. and James L. Knight Foundation | Manhattan Institute for Policy Research                  | .         | .         | 100,000 | .         | .       | .       | .       | .         |
| John Templeton Foundation              | American Enterprise Institute for Public Policy Research | .         | .         | 123,500 | 19,800    | 20,000  | 20,000  | 205,000 | 610,000   |
| John Templeton Foundation              | American Friends of the Institute of Economic Affairs    | .         | .         | .       | 400       | .       | .       | .       | .         |
| John Templeton Foundation              | Americans for Prosperity Foundation                      | .         | .         | .       | .         | 25,000  | .       | .       | .         |
| John Templeton Foundation              | Atlas Economic Research Foundation                       | 2,750,000 | 2,204,000 | 5,000   | 1,353,715 | 310,000 | 323,000 | 843,000 | 2,060,500 |
| John Templeton Foundation              | Cato Institute                                           | .         | 50,000    | 103,200 | 106,100   | 44,820  | 54,780  | .       | .         |
| John Templeton Foundation              | Heritage Foundation                                      | .         | .         | 843,314 | 668,314   | 377,550 | 187,493 | 93,271  | 50,000    |
| John Templeton Foundation              | Hoover Institution on War, Revolution and Peace          | 136,500   | .         | .       | .         | .       | .       | .       | .         |
| John Templeton Foundation              | Hudson Institute                                         | .         | .         | .       | 300,000   | 245,000 | 143,750 | 162,500 | 483,750   |
| John Templeton Foundation              | Independent Institute                                    | .         | .         | 500,000 | 306,000   | 115,680 | 106,680 | 76,180  | .         |
| John Templeton Foundation              | Manhattan Institute for Policy Research                  | .         | 600,000   | 80,000  | 444,000   | 60,000  | .       | 15,000  | .         |
| John Templeton Foundation              | Media Research Center                                    | 50,000    | .         | 50,000  | 1,005,000 | 300,000 | 300,000 | 200,000 | .         |
| John Templeton Foundation              | Mercatus Center                                          | .         | .         | 500,000 | 250,971   | 50,092  | .       | .       | .         |
| John Templeton Foundation              | Pacific Research Institute for Public Policy             | 175,000   | 100,000   | .       | .         | .       | .       | .       | .         |
| John William Pope Foundation           | American Conservative Union Foundation                   | 5,000     | 5,000     | 11,000  | 10,000    | 5,000   | .       | .       | .         |
| John William Pope Foundation           | American Council for Capital Formation                   | .         | .         | .       | 10,000    | .       | .       | .       | .         |
| John William Pope Foundation           | American Enterprise Institute for Public Policy Research | .         | .         | .       | .         | .       | 10,000  | 10,000  | 10,000    |
| John William Pope Foundation           | Americans for Prosperity Foundation                      | 150,000   | 150,000   | 212,500 | 275,000   | 170,000 | 300,000 | 500,000 | 275,000   |

| Foundation                   | Recipient                                       | 2003      | 2004      | 2005      | 2006      | 2007      | 2008      | 2009      | 2010      |
|------------------------------|-------------------------------------------------|-----------|-----------|-----------|-----------|-----------|-----------|-----------|-----------|
| John William Pope Foundation | Atlas Economic Research Foundation              | 100,000   | 100,000   | 100,000   | 125,000   | 100,000   | 75,000    | 75,000    | 50,000    |
| John William Pope Foundation | Capital Research Center                         | 10,000    | 10,000    | 15,000    | 10,000    | 10,000    | 10,000    | 10,000    | .         |
| John William Pope Foundation | Cato Institute                                  | 100,000   | 100,000   | 100,000   | 100,000   | 75,000    | 75,000    | 50,000    | 25,000    |
| John William Pope Foundation | Committee for a Constructive Tomorrow           | 5,000     | 5,000     | .         | .         | .         | .         | .         | .         |
| John William Pope Foundation | Competitive Enterprise Institute                | 25,000    | 25,000    | 15,000    | 10,000    | 15,000    | 15,000    | 10,000    | 10,000    |
| John William Pope Foundation | George C. Marshall Institute                    | .         | .         | .         | 1,000     | .         | .         | .         | .         |
| John William Pope Foundation | Heartland Institute                             | .         | .         | .         | .         | 25,000    | 25,000    | 25,000    | 25,000    |
| John William Pope Foundation | Heritage Foundation                             | 100,000   | 100,000   | 100,000   | 100,000   | 75,000    | 75,000    | 50,000    | 50,000    |
| John William Pope Foundation | Hudson Institute                                | .         | 1,000     | 1,000     | .         | .         | .         | .         | .         |
| John William Pope Foundation | Independent Womens Forum                        | .         | .         | .         | .         | .         | .         | 20,000    | 10,000    |
| John William Pope Foundation | John Locke Foundation                           | 1,503,714 | 1,503,727 | 1,695,619 | 2,625,807 | 2,599,508 | 2,599,508 | 1,339,754 | 2,614,508 |
| John William Pope Foundation | Manhattan Institute for Policy Research         | .         | .         | .         | 10,000    | 10,000    | 10,000    | 10,000    | .         |
| John William Pope Foundation | Mercatus Center                                 | 25,000    | 25,000    | 50,000    | 50,000    | 50,000    | 50,000    | 50,000    | 25,000    |
| John William Pope Foundation | National Center for Policy Analysis             | .         | 5,000     | 10,000    | 10,000    | 10,000    | 10,000    | 10,000    | .         |
| John William Pope Foundation | National Taxpayers Union                        | 1,000     | 1,000     | .         | .         | 10,000    | 10,000    | .         | .         |
| John William Pope Foundation | National Taxpayers Union Foundation             | .         | .         | .         | 10,000    | .         | .         | 10,000    | .         |
| John William Pope Foundation | Pacific Research Institute for Public Policy    | 10,000    | 10,000    | 10,000    | 10,000    | 10,000    | 10,000    | 10,000    | 10,000    |
| John William Pope Foundation | Reason Foundation                               | 60,000    | 60,000    | 50,000    | 50,000    | 50,000    | 50,000    | 25,000    | 25,000    |
| John William Pope Foundation | Southeastern Legal Foundation                   | .         | 1,000     | .         | .         | .         | .         | .         | .         |
| John William Pope Foundation | State Policy Network                            | .         | .         | .         | .         | 10,000    | 10,000    | 10,000    | 25,000    |
| K. C. Ames Foundation        | Atlas Economic Research Foundation              | .         | 5,000     | .         | .         | .         | .         | .         | .         |
| K. C. Ames Foundation        | Cato Institute                                  | .         | 30,000    | .         | .         | .         | .         | .         | .         |
| K. C. Ames Foundation        | Competitive Enterprise Institute                | .         | 10,000    | .         | .         | .         | .         | .         | .         |
| K. C. Ames Foundation        | George C. Marshall Institute                    | .         | 10,000    | .         | .         | .         | .         | .         | .         |
| K. C. Ames Foundation        | Heartland Institute                             | .         | 10,000    | .         | .         | .         | .         | .         | .         |
| K. C. Ames Foundation        | Hoover Institution on War, Revolution and Peace | .         | 30,000    | .         | .         | .         | .         | .         | .         |
| K. C. Ames Foundation        | Independent Institute                           | .         | 10,000    | .         | .         | .         | .         | .         | .         |
| K. C. Ames Foundation        | Manhattan Institute for Policy Research         | .         | 20,000    | .         | .         | .         | .         | .         | .         |
| K. C. Ames Foundation        | National Center for Policy Analysis             | .         | 20,000    | .         | .         | .         | .         | .         | .         |
| K. C. Ames Foundation        | Reason Foundation                               | .         | 60,000    | .         | .         | .         | .         | .         | .         |
| K. C. Ames Foundation        | Science and Environmental Policy Project        | .         | 5,000     | .         | .         | .         | .         | .         | .         |
| Koch Affiliated Foundations  | American Conservative Union Foundation          | .         | .         | 2,000     | .         | .         | .         | .         | .         |
| Koch Affiliated Foundations  | American Council for Capital Formation          | .         | .         | 25,000    | 40,000    | 50,000    | 100,000   | .         | .         |

| Foundation                  | Recipient                                                            | 2003    | 2004    | 2005      | 2006      | 2007      | 2008      | 2009    | 2010    |
|-----------------------------|----------------------------------------------------------------------|---------|---------|-----------|-----------|-----------|-----------|---------|---------|
| Koch Affiliated Foundations | American Council for Capital Formation Center for Policy Research    | .       | .       | .         | .         | .         | .         | 100,000 | 50,000  |
| Koch Affiliated Foundations | American Enterprise Institute for Public Policy Research             | .       | 50,000  | .         | 100,000   | .         | .         | .       | .       |
| Koch Affiliated Foundations | American Legislative Exchange Council                                | .       | .       | .         | .         | 75,000    | .         | 200,858 | 100,000 |
| Koch Affiliated Foundations | Americans for Prosperity Foundation                                  | .       | .       | 1,000,000 | 1,151,500 | 1,025,000 | 2,000,000 | 434,281 | 150,000 |
| Koch Affiliated Foundations | Atlas Economic Research Foundation                                   | .       | .       | .         | .         | 25,000    | 35,000    | 38,800  | .       |
| Koch Affiliated Foundations | Capital Research Center                                              | 100,000 | 100,000 | 50,000    | 25,000    | 25,000    | 10,000    | .       | 20,000  |
| Koch Affiliated Foundations | Cato Institute                                                       | 250,000 | 250,000 | 250,000   | 250,000   | 250,000   | 270,000   | 250,000 | 7,350   |
| Koch Affiliated Foundations | Center for the Study of Carbon Dioxide and Global Change/CO2 Science | .       | .       | 35,000    | .         | 25,000    | .         | .       | .       |
| Koch Affiliated Foundations | Competitive Enterprise Institute                                     | 27,320  | 54,640  | .         | .         | .         | .         | 34,079  | 9,200   |
| Koch Affiliated Foundations | Consumer Alert                                                       | .       | 10,000  | .         | .         | .         | .         | .       | .       |
| Koch Affiliated Foundations | Environmental Literacy Council                                       | 57,516  | 50,000  | 50,000    | 50,000    | 50,000    | .         | .       | .       |
| Koch Affiliated Foundations | George C. Marshall Institute                                         | .       | .       | .         | 70,000    | 70,000    | 70,000    | 70,000  | .       |
| Koch Affiliated Foundations | Heritage Foundation                                                  | 405,000 | 465,000 | 465,000   | 465,000   | 465,000   | 225,000   | 618,571 | 500,000 |
| Koch Affiliated Foundations | Independence Institute                                               | 6,000   | .       | 66,661    | 18,339    | .         | .         | .       | .       |
| Koch Affiliated Foundations | Independent Womens Forum                                             | .       | .       | 25,000    | 15,000    | 250,000   | .         | 150,000 | 350,000 |
| Koch Affiliated Foundations | Institute for Energy Research                                        | 10,000  | .       | .         | .         | .         | .         | .       | .       |
| Koch Affiliated Foundations | International Policy Network - U.S.                                  | .       | .       | 25,000    | .         | .         | .         | .       | .       |
| Koch Affiliated Foundations | James Madison Institute for Public Policy Studies                    | .       | .       | .         | .         | .         | 39,462    | .       | 7,500   |
| Koch Affiliated Foundations | John Locke Foundation                                                | 5,000   | 50,000  | 10,000    | .         | .         | .         | 37,472  | .       |
| Koch Affiliated Foundations | Manhattan Institute for Policy Research                              | 200,000 | 200,000 | 200,000   | 200,000   | 200,000   | 200,000   | 200,000 | 200,000 |
| Koch Affiliated Foundations | Media Research Center                                                | .       | 975     | .         | .         | .         | .         | .       | .       |
| Koch Affiliated Foundations | Mercatus Center                                                      | 27,000  | .       | 1,015,000 | 3,900,000 | 2,682,500 | 1,050,000 | .       | .       |
| Koch Affiliated Foundations | National Center for Policy Analysis                                  | 30,000  | 45,000  | 25,000    | 25,000    | 40,000    | 40,000    | 25,000  | 25,000  |
| Koch Affiliated Foundations | Pacific Research Institute for Public Policy                         | 90,000  | 90,000  | 90,000    | 90,000    | 90,000    | 90,000    | 100,000 | .       |
| Koch Affiliated Foundations | Reason Foundation                                                    | .       | 35,000  | 65,000    | 90,000    | .         | 50,000    | 110,618 | .       |
| Koch Affiliated Foundations | Science and Environmental Policy Project                             | 5,000   | .       | .         | .         | .         | .         | .       | .       |
| Koch Affiliated Foundations | State Policy Network                                                 | .       | 2,500   | 15,000    | 15,000    | .         | .         | .       | .       |
| Koch Affiliated Foundations | Texas Public Policy Foundation                                       | .       | 66,374  | 45,642    | 92,983    | 70,000    | 74,500    | 100,000 | 50,000  |
| Koret Foundation            | American Enterprise Institute for Public Policy Research             | 20,000  | 27,900  | 25,000    | .         | 25,000    | .         | .       | .       |
| Koret Foundation            | Capital Research Center                                              | .       | 2,000   | 3,000     | .         | 2,500     | 2,500     | 2,500   | .       |
| Koret Foundation            | Heritage Foundation                                                  | .       | 2,500   | 5,000     | .         | 5,000     | .         | .       | .       |
| Koret Foundation            | Hoover Institution on War, Revolution and Peace                      | 275,000 | 324,100 | .         | .         | .         | .         | .       | .       |
| Koret Foundation            | Independent Institute                                                | 15,000  | .       | 15,000    | 15,000    | .         | 40,000    | 6,000   | 32,000  |

| Foundation                            | Recipient                                                | 2003    | 2004    | 2005      | 2006      | 2007    | 2008      | 2009    | 2010    |
|---------------------------------------|----------------------------------------------------------|---------|---------|-----------|-----------|---------|-----------|---------|---------|
| Koret Foundation                      | Independent Womens Forum                                 | .       | .       | .         | .         | 3,000   | .         | .       | .       |
| Koret Foundation                      | National Taxpayers Union Foundation                      | 2,500   | 2,500   | 1,000     | .         | 3,000   | 3,000     | 3,000   | .       |
| Koret Foundation                      | Pacific Research Institute for Public Policy             | 35,000  | 80,000  | 40,000    | 108,000   | 68,000  | 88,500    | 85,000  | 235,000 |
| Lakeside Foundation                   | American Enterprise Institute for Public Policy Research | 15,000  | 15,000  | 15,000    | 15,000    | 15,000  | 15,000    | 15,000  | 15,000  |
| Lakeside Foundation                   | Hoover Institution on War, Revolution and Peace          | 800,000 | 300,000 | 1,000,000 | 1,250,000 | 800,000 | 550,000   | 600,000 | 350,000 |
| Lillian S. Wells Foundation, Inc.     | Capital Research Center                                  | .       | 50,000  | 50,000    | .         | 50,000  | .         | .       | .       |
| Lillian S. Wells Foundation, Inc.     | Heritage Foundation                                      | 300,000 | 900,000 | 700,000   | 500,000   | 500,000 | 1,005,164 | 500,000 | 500,000 |
| Lillian S. Wells Foundation, Inc.     | James Madison Institute for Public Policy Studies        | .       | .       | .         | .         | 35,000  | .         | 55,000  | 55,000  |
| Lilly Endowment Inc.                  | American Enterprise Institute for Public Policy Research | 100,000 | 100,000 | 100,000   | 100,000   | 100,000 | 100,000   | 100,000 | 100,000 |
| Lilly Endowment Inc.                  | Atlas Economic Research Foundation                       | 500,000 | 500,000 | 500,000   | 500,000   | 500,000 | 500,000   | 500,000 | 500,000 |
| Lilly Endowment Inc.                  | Hudson Institute                                         | 650,000 | .       | .         | .         | .       | .         | .       | .       |
| Lilly Endowment Inc.                  | Manhattan Institute for Policy Research                  | 200,000 | 200,000 | 200,000   | 200,000   | 200,000 | 200,000   | 200,000 | 200,000 |
| Lilly Endowment Inc.                  | National Center for Policy Analysis                      | 150,000 | 150,000 | 150,000   | 150,000   | 150,000 | 150,000   | 150,000 | 150,000 |
| Lilly Endowment Inc.                  | Pacific Research Institute for Public Policy             | 175,000 | 175,000 | 175,000   | 175,000   | 175,000 | .         | .       | .       |
| Lilly Endowment Inc.                  | Reason Foundation                                        | 225,000 | 225,000 | 225,000   | 225,000   | 225,000 | .         | .       | .       |
| Lovett & Ruth Peters Foundation       | American Enterprise Institute for Public Policy Research | .       | .       | .         | .         | .       | .         | .       | 40,000  |
| Lovett & Ruth Peters Foundation       | American Friends of the Institute of Economic Affairs    | .       | .       | .         | .         | 12,000  | 22,000    | .       | .       |
| Lovett & Ruth Peters Foundation       | Americans for Prosperity Foundation                      | .       | .       | .         | .         | 50,000  | 50,000    | .       | .       |
| Lovett & Ruth Peters Foundation       | Atlas Economic Research Foundation                       | .       | .       | .         | .         | 10,000  | .         | .       | 20,000  |
| Lovett & Ruth Peters Foundation       | Cato Institute                                           | .       | .       | .         | .         | .       | 25,000    | .       | 100,000 |
| Lovett & Ruth Peters Foundation       | Heritage Foundation                                      | .       | .       | .         | .         | 100,000 | .         | 25,000  | 25,000  |
| Lovett & Ruth Peters Foundation       | James Madison Institute for Public Policy Studies        | .       | .       | .         | .         | 5,100   | .         | .       | .       |
| Lovett & Ruth Peters Foundation       | Landmark Legal Foundation                                | .       | .       | .         | .         | .       | 50,000    | 50,000  | .       |
| Lovett & Ruth Peters Foundation       | Manhattan Institute for Policy Research                  | .       | .       | .         | .         | .       | .         | .       | 10,000  |
| Lovett & Ruth Peters Foundation       | National Center for Policy Analysis                      | .       | .       | .         | .         | .       | 50,000    | .       | .       |
| Lovett & Ruth Peters Foundation       | Pacific Research Institute for Public Policy             | .       | .       | .         | .         | 120,000 | .         | .       | 120,000 |
| Lovett & Ruth Peters Foundation       | Reason Foundation                                        | .       | .       | .         | .         | .       | 25,000    | 25,000  | 25,000  |
| Lovett & Ruth Peters Foundation       | State Policy Network                                     | .       | .       | .         | .         | .       | 10,000    | 10,000  | 35,000  |
| Lumina Foundation for Education, Inc. | American Legislative Exchange Council                    | .       | .       | .         | .         | .       | 300,000   | .       | 295,000 |
| M. J. Murdock Charitable Trust        | Cascade Policy Institute                                 | .       | .       | 130,000   | .         | .       | 225,000   | .       | .       |
| M. J. Murdock Charitable Trust        | Heritage Foundation                                      | .       | 300,000 | 300,000   | .         | 375,000 | 375,000   | .       | .       |
| M. J. Murdock Charitable Trust        | National Center for Policy Analysis                      | .       | .       | 450,000   | .         | 450,000 | .         | .       | .       |
| M. J. Murdock Charitable Trust        | Washington Policy Center                                 | .       | 45,000  | 50,000    | .         | 180,000 | .         | .       | .       |

| Foundation                                 | Recipient                                                | 2003    | 2004    | 2005    | 2006    | 2007    | 2008    | 2009      | 2010      |
|--------------------------------------------|----------------------------------------------------------|---------|---------|---------|---------|---------|---------|-----------|-----------|
| Malott Family Foundation                   | American Enterprise Institute for Public Policy Research | 40,000  | 20,000  | 20,000  | 20,000  | 250,000 | 290,000 | 20,000    | 270,000   |
| Malott Family Foundation                   | Hoover Institution on War, Revolution and Peace          | 20,000  | 10,000  | 25,000  | 25,000  | 25,000  | 25,000  | .         | 500       |
| Mercer Family Foundation                   | Heartland Institute                                      | .       | .       | .       | .       | .       | .       | 500,000   | 370,000   |
| Mercer Family Foundation                   | Manhattan Institute for Policy Research                  | .       | .       | .       | .       | .       | .       | 50,000    | .         |
| Mercer Family Foundation                   | Media Research Center                                    | .       | .       | .       | .       | .       | 500,000 | 1,000,000 | 1,194,000 |
| Mercer Family Foundation                   | Oregon Institute of Science and Medicine                 | .       | .       | 60,000  | 50,000  | .       | .       | .         | 100,000   |
| Modzelewski Charitable Trust               | Cato Institute                                           | 110,000 | 102,750 | .       | .       | .       | .       | .         | .         |
| Modzelewski Charitable Trust               | Committee for a Constructive Tomorrow                    | .       | .       | .       | .       | .       | .       | .         | 2,000     |
| Modzelewski Charitable Trust               | Competitive Enterprise Institute                         | 20,000  | 30,000  | 30,000  | .       | .       | .       | .         | .         |
| Modzelewski Charitable Trust               | Consumer Alert                                           | 5,000   | 5,000   | .       | .       | .       | .       | .         | .         |
| Modzelewski Charitable Trust               | FreedomWorks                                             | 25,000  | .       | 25,000  | .       | .       | .       | .         | .         |
| Modzelewski Charitable Trust               | Mercatus Center                                          | 20,000  | .       | 15,000  | .       | .       | .       | .         | .         |
| Modzelewski Charitable Trust               | National Center for Policy Analysis                      | 10,000  | 10,000  | .       | .       | .       | .       | .         | .         |
| Modzelewski Charitable Trust               | Reason Foundation                                        | 150,000 | 152,600 | 150,000 | 250,000 | .       | 300,000 | .         | .         |
| PacifiCorp Foundation                      | Institute for Energy Research                            | .       | .       | .       | .       | .       | .       | 250,000   | .         |
| Pierre F. and Enid Goodrich Foundation     | Atlas Economic Research Foundation                       | 20,000  | .       | 20,000  | 20,000  | 20,000  | 20,000  | .         | 15,000    |
| Pierre F. and Enid Goodrich Foundation     | Cato Institute                                           | 15,000  | .       | 50,000  | 15,000  | 30,000  | 30,000  | 30,000    | 25,000    |
| Pierre F. and Enid Goodrich Foundation     | Heritage Foundation                                      | 15,000  | .       | 15,000  | 15,000  | 25,000  | 25,000  | 25,000    | 20,000    |
| Pierre F. and Enid Goodrich Foundation     | Independent Institute                                    | .       | .       | .       | 25,000  | 20,000  | 20,000  | 20,000    | 15,000    |
| Pierre F. and Enid Goodrich Foundation     | International Policy Network - U.S.                      | .       | .       | .       | 41,000  | .       | .       | .         | .         |
| Pierre F. and Enid Goodrich Foundation     | Mercatus Center                                          | .       | .       | .       | .       | 20,000  | 20,000  | 20,000    | 15,000    |
| Pierre F. and Enid Goodrich Foundation     | Reason Foundation                                        | .       | .       | 20,000  | .       | .       | .       | .         | .         |
| Richard & Barbara Gaby Foundation          | Capital Research Center                                  | .       | .       | .       | .       | 20,000  | 10,000  | 10,000    | 10,000    |
| Richard & Barbara Gaby Foundation          | Heritage Foundation                                      | .       | .       | .       | 200,000 | 500,000 | .       | 504,560   | 500,000   |
| Robert & Ardis James Foundation            | Hudson Institute                                         | .       | .       | .       | .       | .       | .       | 30,000    | 54,000    |
| Robert & Ardis James Foundation            | Independent Institute                                    | .       | .       | .       | .       | .       | .       | .         | 100       |
| Robert & Ardis James Foundation            | Manhattan Institute for Policy Research                  | .       | 2,000   | 156,000 | 100,000 | 200,000 | 200,000 | 200,000   | 250,000   |
| Robert & Ardis James Foundation            | Mountain States Legal Foundation                         | .       | .       | .       | .       | .       | .       | .         | 100       |
| Rose-Marie and Jack R. Anderson Foundation | American Friends of the Institute of Economic Affairs    | .       | .       | .       | .       | 10,000  | .       | .         | .         |
| Rose-Marie and Jack R. Anderson Foundation | Cato Institute                                           | .       | .       | 25,000  | 40,000  | 50,000  | 74,600  | 60,000    | 60,000    |
| Rose-Marie and Jack R. Anderson Foundation | Hoover Institution on War, Revolution and Peace          | 50,000  | 50,000  | 100,000 | .       | 150,000 | 200,000 | 200,000   | 200,000   |
| Rose-Marie and Jack R. Anderson Foundation | National Center for Policy Analysis                      | 25,000  | 40,000  | 40,000  | 40,000  | 40,000  | 50,000  | 65,000    | 50,000    |
| S.D. Bechtel, Jr. Foundation               | American Enterprise Institute for Public Policy Research | .       | .       | .       | .       | .       | .       | 605,000   | .         |

| Foundation                    | Recipient                                                            | 2003      | 2004    | 2005    | 2006    | 2007      | 2008      | 2009      | 2010      |
|-------------------------------|----------------------------------------------------------------------|-----------|---------|---------|---------|-----------|-----------|-----------|-----------|
| S.D. Bechtel, Jr. Foundation  | Pacific Research Institute for Public Policy                         | .         | .       | .       | .       | .         | .         | 2,500     | .         |
| Scaife Affiliated Foundations | American Enterprise Institute for Public Policy Research             | 400,000   | 525,000 | 525,000 | 575,000 | 200,000   | 575,000   | 500,000   | 500,000   |
| Scaife Affiliated Foundations | American Legislative Exchange Council                                | 35,000    | 35,000  | 35,000  | 45,000  | 50,000    | 50,000    | 25,000    | .         |
| Scaife Affiliated Foundations | Americans for Prosperity Foundation                                  | 175,000   | .       | .       | .       | .         | .         | .         | .         |
| Scaife Affiliated Foundations | Atlas Economic Research Foundation                                   | 200,000   | 250,000 | 250,000 | 270,000 | 200,000   | 270,000   | 200,000   | 150,000   |
| Scaife Affiliated Foundations | Capital Research Center                                              | 185,000   | 235,000 | 235,000 | 250,000 | 250,000   | 225,000   | 175,000   | 175,000   |
| Scaife Affiliated Foundations | Cato Institute                                                       | 60,000    | 125,000 | 125,000 | 60,000  | .         | 50,000    | 40,000    | 40,000    |
| Scaife Affiliated Foundations | Center for the Study of Carbon Dioxide and Global Change/CO2 Science | 50,000    | .       | .       | .       | .         | .         | .         | .         |
| Scaife Affiliated Foundations | Committee for a Constructive Tomorrow                                | .         | 160,000 | 160,000 | 200,000 | 200,000   | 200,000   | 160,000   | 160,000   |
| Scaife Affiliated Foundations | Competitive Enterprise Institute                                     | 125,000   | 150,000 | 300,000 | 350,000 | 350,000   | 350,000   | 300,000   | 300,000   |
| Scaife Affiliated Foundations | Environmental Literacy Council                                       | 75,000    | 75,000  | 75,000  | 75,000  | 75,000    | 75,000    | .         | .         |
| Scaife Affiliated Foundations | FreedomWorks Foundation                                              | .         | 250,000 | 250,000 | 200,000 | 200,000   | 140,000   | 125,000   | 125,000   |
| Scaife Affiliated Foundations | George C. Marshall Institute                                         | 155,000   | 190,000 | 325,000 | 255,000 | 255,000   | 255,000   | 230,000   | 230,000   |
| Scaife Affiliated Foundations | Heritage Foundation                                                  | 2,400,000 | .       | .       | 800,000 | 900,000   | 800,000   | 600,000   | 1,850,000 |
| Scaife Affiliated Foundations | Hoover Institution on War, Revolution and Peace                      | .         | 500,000 | .       | .       | 650,000   | .         | 300,000   | .         |
| Scaife Affiliated Foundations | Hudson Institute                                                     | 175,000   | 150,000 | 200,000 | 200,000 | 340,000   | 340,000   | 140,000   | 240,000   |
| Scaife Affiliated Foundations | Independent Womens Forum                                             | 175,000   | 150,000 | 150,000 | 125,000 | 100,000   | 100,000   | .         | .         |
| Scaife Affiliated Foundations | International Policy Network - U.S.                                  | .         | .       | 50,000  | .       | 50,000    | 75,000    | 50,000    | 50,000    |
| Scaife Affiliated Foundations | Landmark Legal Foundation                                            | 250,000   | 500,000 | 500,000 | 450,000 | 400,000   | 400,000   | 300,000   | 250,000   |
| Scaife Affiliated Foundations | Manhattan Institute for Policy Research                              | 180,000   | 190,000 | 240,000 | 240,000 | 240,000   | 200,000   | 150,000   | 150,000   |
| Scaife Affiliated Foundations | Media Research Center                                                | 1,050,000 | .       | .       | 350,000 | 350,000   | 350,000   | 250,000   | 250,000   |
| Scaife Affiliated Foundations | Mercatus Center                                                      | .         | 80,000  | 80,000  | 80,000  | 80,000    | 80,000    | 50,000    | 50,000    |
| Scaife Affiliated Foundations | Mountain States Legal Foundation                                     | 25,000    | .       | 25,000  | 25,000  | 25,000    | 25,000    | .         | .         |
| Scaife Affiliated Foundations | National Center for Policy Analysis                                  | 125,000   | 125,000 | 125,000 | 125,000 | 125,000   | 125,000   | 100,000   | 100,000   |
| Scaife Affiliated Foundations | National Center for Public Policy Research                           | 50,000    | 50,000  | 50,000  | 50,000  | 50,000    | .         | 35,000    | 35,000    |
| Scaife Affiliated Foundations | National Taxpayers Union Foundation                                  | 100,000   | 60,000  | 60,000  | 75,000  | 75,000    | 75,000    | 50,000    | 50,000    |
| Scaife Affiliated Foundations | Pacific Research Institute for Public Policy                         | 200,000   | 200,000 | 200,000 | 200,000 | 200,000   | 200,000   | 150,000   | 150,000   |
| Scaife Affiliated Foundations | Reason Foundation                                                    | .         | 100,000 | 100,000 | 125,000 | 125,000   | 125,000   | 100,000   | 100,000   |
| Scaife Affiliated Foundations | Southeastern Legal Foundation                                        | .         | 100,000 | 100,000 | 75,000  | 75,000    | 75,000    | 50,000    | 50,000    |
| Searle Freedom Trust          | American Council for Capital Formation                               | .         | .       | .       | .       | .         | .         | 100,000   | .         |
| Searle Freedom Trust          | American Council for Capital Formation Center for Policy Research    | .         | .       | .       | .       | .         | 60,000    | .         | 100,000   |
| Searle Freedom Trust          | American Enterprise Institute for Public Policy Research             | .         | .       | .       | 194,000 | 1,800,000 | 1,500,000 | 1,500,000 | 1,500,000 |
| Searle Freedom Trust          | American Legislative Exchange Council                                | 50,000    | 50,000  | .       | 100,000 | .         | 100,000   | 120,000   | 125,000   |

| Foundation                        | Recipient                                                | 2003    | 2004    | 2005    | 2006    | 2007      | 2008      | 2009    | 2010    |
|-----------------------------------|----------------------------------------------------------|---------|---------|---------|---------|-----------|-----------|---------|---------|
| Searle Freedom Trust              | Americans for Prosperity Foundation                      | .       | .       | .       | 25,000  | 50,000    | 50,000    | 96,000  | 100,000 |
| Searle Freedom Trust              | Atlas Economic Research Foundation                       | .       | .       | .       | .       | 70,000    | .         | .       | .       |
| Searle Freedom Trust              | Capital Research Center                                  | .       | .       | 25,000  | 25,000  | 35,000    | .         | 35,000  | 35,000  |
| Searle Freedom Trust              | Cascade Policy Institute                                 | .       | 30,000  | .       | .       | .         | .         | .       | .       |
| Searle Freedom Trust              | Cato Institute                                           | 100,000 | 50,000  | 50,000  | 100,000 | 200,000   | .         | 200,000 | 200,000 |
| Searle Freedom Trust              | Competitive Enterprise Institute                         | 75,000  | 100,000 | 50,000  | 160,000 | 100,000   | 225,000   | 225,000 | 175,000 |
| Searle Freedom Trust              | Free Enterprise Education Institute                      | .       | .       | .       | 75,000  | .         | .         | .       | .       |
| Searle Freedom Trust              | FreedomWorks                                             | .       | .       | .       | .       | .         | .         | .       | 60,000  |
| Searle Freedom Trust              | FreedomWorks Foundation                                  | .       | .       | .       | .       | .         | 50,000    | .       | .       |
| Searle Freedom Trust              | George C. Marshall Institute                             | 20,000  | .       | .       | .       | .         | 60,000    | .       | .       |
| Searle Freedom Trust              | Heartland Institute                                      | .       | .       | .       | .       | .         | .         | 150,000 | .       |
| Searle Freedom Trust              | Heritage Foundation                                      | 100,000 | 100,000 | 100,000 | 100,000 | .         | 80,000    | 125,000 | 295,000 |
| Searle Freedom Trust              | Hoover Institution on War, Revolution and Peace          | .       | .       | .       | .       | .         | 200,000   | .       | 100,000 |
| Searle Freedom Trust              | Hudson Institute                                         | .       | .       | 75,000  | .       | 75,000    | .         | 75,000  | .       |
| Searle Freedom Trust              | Independent Womens Forum                                 | 50,000  | .       | .       | .       | 50,000    | 75,000    | .       | .       |
| Searle Freedom Trust              | John Locke Foundation                                    | .       | .       | .       | .       | .         | 30,000    | .       | .       |
| Searle Freedom Trust              | Manhattan Institute for Policy Research                  | 100,000 | 100,000 | .       | 300,000 | 436,000   | 450,000   | 450,000 | 450,000 |
| Searle Freedom Trust              | Mercatus Center                                          | .       | 40,000  | .       | 100,000 | 150,000   | 230,000   | 250,000 | 250,000 |
| Searle Freedom Trust              | National Taxpayers Union                                 | 25,000  | .       | .       | .       | .         | .         | .       | 40,000  |
| Searle Freedom Trust              | National Taxpayers Union Foundation                      | .       | 25,000  | .       | 40,000  | 40,000    | 40,000    | 40,000  | .       |
| Searle Freedom Trust              | Pacific Research Institute for Public Policy             | 80,000  | 80,000  | .       | 140,000 | 160,000   | 255,000   | 300,000 | 275,000 |
| Searle Freedom Trust              | Reason Foundation                                        | 100,000 | 100,000 | 100,000 | 250,000 | 250,000   | 810,000   | 750,000 | 805,000 |
| Searle Freedom Trust              | State Policy Network                                     | .       | 15,000  | .       | 241,000 | 355,000   | 360,000   | 341,000 | 371,500 |
| Searle Freedom Trust              | Texas Public Policy Foundation                           | .       | .       | .       | .       | 100,000   | .         | .       | .       |
| Sid W. Richardson Foundation      | National Center for Policy Analysis                      | .       | 200,000 | 100,000 | 100,000 | 100,000   | 100,000   | 100,000 | 100,000 |
| Smith Richardson Foundation, Inc. | American Enterprise Institute for Public Policy Research | 886,667 | 233,333 | 675,000 | 426,280 | 1,328,250 | 732,000   | 985,000 | 450,000 |
| Smith Richardson Foundation, Inc. | Atlas Economic Research Foundation                       | .       | .       | .       | 239,830 | 264,000   | .         | 3,000   | .       |
| Smith Richardson Foundation, Inc. | Cato Institute                                           | .       | .       | 50,000  | .       | .         | .         | .       | .       |
| Smith Richardson Foundation, Inc. | Hoover Institution on War, Revolution and Peace          | 47,400  | .       | 224,388 | 581,458 | 250,000   | 330,683   | 250,000 | 255,452 |
| Smith Richardson Foundation, Inc. | Hudson Institute                                         | 25,000  | 473,800 | 550,000 | 773,100 | 195,750   | 1,325,000 | 39,820  | 517,500 |
| Smith Richardson Foundation, Inc. | Manhattan Institute for Policy Research                  | .       | 84,000  | 327,467 | 174,115 | 348,304   | 69,014    | 352,500 | 75,000  |
| Stephen Bechtel Fund              | American Enterprise Institute for Public Policy Research | .       | .       | .       | .       | .         | 15,000    | .       | 650,000 |
| Stephen Bechtel Fund              | Americans for Prosperity Foundation                      | .       | .       | .       | .       | .         | 25,000    | 200,000 | .       |



| Foundation                                      | Recipient                                                | 2003    | 2004    | 2005    | 2006    | 2007    | 2008    | 2009    | 2010    |
|-------------------------------------------------|----------------------------------------------------------|---------|---------|---------|---------|---------|---------|---------|---------|
| Stephen Bechtel Fund                            | Hoover Institution on War, Revolution and Peace          | .       | .       | .       | .       | .       | 100,000 | .       | .       |
| Stephen Bechtel Fund                            | Mercatus Center                                          | .       | .       | .       | .       | .       | .       | 50,000  | 200,000 |
| Susquehanna Foundation                          | Americans for Prosperity Foundation                      | .       | .       | 1,000   | 5,000   | .       | 5,000   | .       | .       |
| Susquehanna Foundation                          | Atlas Economic Research Foundation                       | .       | .       | 11,000  | .       | .       | .       | 40,000  | 25,000  |
| Susquehanna Foundation                          | Cato Institute                                           | 320,000 | 480,000 | 895,000 | 610,000 | 510,000 | 426,000 | .       | 100,000 |
| Susquehanna Foundation                          | Committee for a Constructive Tomorrow                    | .       | .       | .       | .       | .       | 1,000   | .       | .       |
| Susquehanna Foundation                          | Competitive Enterprise Institute                         | .       | 10,000  | 30,000  | 45,000  | 25,000  | 25,000  | 27,000  | 5,000   |
| Susquehanna Foundation                          | FreedomWorks                                             | .       | .       | .       | .       | 10,000  | 5,000   | 85,000  | 175,000 |
| Susquehanna Foundation                          | FreedomWorks Foundation                                  | .       | .       | 10,000  | .       | .       | .       | .       | .       |
| Susquehanna Foundation                          | Independent Institute                                    | .       | .       | 1,000   | 1,000   | .       | .       | 1,000   | .       |
| Susquehanna Foundation                          | Independent Womens Forum                                 | .       | .       | 1,000   | .       | .       | .       | .       | .       |
| Susquehanna Foundation                          | Manhattan Institute for Policy Research                  | .       | 977     | .       | .       | .       | .       | .       | .       |
| Susquehanna Foundation                          | Reason Foundation                                        | .       | 1,000   | 11,000  | 11,000  | 5,000   | 2,000   | 7,500   | .       |
| Sweetfeet Foundation, Inc.                      | Hudson Institute                                         | .       | .       | 360,000 | .       | .       | .       | .       | .       |
| Taube Family Foundation                         | American Enterprise Institute for Public Policy Research | .       | .       | .       | .       | .       | .       | .       | 2,500   |
| Taube Family Foundation                         | Committee for a Constructive Tomorrow                    | .       | .       | .       | .       | .       | .       | .       | 500     |
| Taube Family Foundation                         | Competitive Enterprise Institute                         | .       | .       | .       | .       | .       | .       | .       | 250     |
| Taube Family Foundation                         | Hoover Institution on War, Revolution and Peace          | 200,000 | .       | .       | 210,000 | .       | .       | .       | .       |
| The Abstraction Fund                            | Competitive Enterprise Institute                         | .       | .       | .       | .       | .       | .       | 2,000   | .       |
| The Abstraction Fund                            | Hudson Institute                                         | .       | .       | .       | .       | .       | .       | 155,000 | 151,325 |
| The Abstraction Fund                            | Manhattan Institute for Policy Research                  | .       | .       | .       | .       | .       | .       | 51,000  | 25,000  |
| The Achelis Foundation                          | American Enterprise Institute for Public Policy Research | .       | .       | .       | .       | .       | 75,000  | .       | .       |
| The Achelis Foundation                          | Atlas Economic Research Foundation                       | .       | .       | 25,000  | .       | .       | .       | .       | .       |
| The Achelis Foundation                          | Cato Institute                                           | .       | 15,000  | .       | .       | .       | .       | .       | .       |
| The Achelis Foundation                          | George C. Marshall Institute                             | 50,000  | .       | .       | .       | .       | .       | .       | .       |
| The Achelis Foundation                          | Heartland Institute                                      | 15,000  | 15,000  | .       | .       | .       | .       | .       | .       |
| The Achelis Foundation                          | Hudson Institute                                         | .       | .       | 15,000  | .       | 25,000  | .       | .       | .       |
| The Achelis Foundation                          | Manhattan Institute for Policy Research                  | 65,000  | 15,000  | 100,000 | 75,000  | 35,000  | .       | .       | .       |
| The Achelis Foundation                          | National Center for Policy Analysis                      | .       | .       | .       | .       | 75,000  | .       | .       | .       |
| The Alice M. & Thomas J. Tisch Foundation, Inc. | Manhattan Institute for Policy Research                  | .       | 125,000 | 233,200 | 175,000 | .       | 175,000 | 22,850  | .       |
| The Alice M. & Thomas J. Tisch Foundation, Inc. | Reason Foundation                                        | .       | 50,000  | 25,000  | 25,000  | .       | 25,000  | .       | .       |
| The Ambrose Monell Foundation                   | American Enterprise Institute for Public Policy Research | 100,000 | 100,000 | 100,000 | 100,000 | 100,000 | 100,000 | 100,000 | 100,000 |
| The Ambrose Monell Foundation                   | Hoover Institution on War, Revolution and Peace          | 100,000 | 100,000 | 100,000 | 100,000 | 100,000 | 100,000 | 100,000 | 50,000  |

| Foundation                        | Recipient                                                | 2003    | 2004    | 2005    | 2006    | 2007    | 2008    | 2009    | 2010    |
|-----------------------------------|----------------------------------------------------------|---------|---------|---------|---------|---------|---------|---------|---------|
| The Ambrose Monell Foundation     | Independent Institute                                    | .       | .       | 10,000  | 10,000  | 10,000  | 10,000  | 10,000  | .       |
| The Ambrose Monell Foundation     | Manhattan Institute for Policy Research                  | 25,000  | 25,000  | 25,000  | 50,000  | 50,000  | 50,000  | 50,000  | 50,000  |
| The Andrew Cader Foundation, Inc. | Cato Institute                                           | .       | 125,000 | 100,000 | .       | 75,000  | 50,000  | 25,000  | .       |
| The Andrew Cader Foundation, Inc. | Manhattan Institute for Policy Research                  | .       | .       | 200,000 | 125,000 | 25,000  | 125,000 | 100,000 | 100,000 |
| The Andrew Cader Foundation, Inc. | Reason Foundation                                        | .       | .       | .       | 1,000   | .       | 2,500   | .       | .       |
| The Anschutz Foundation           | American Conservative Union Foundation                   | .       | .       | .       | .       | .       | .       | 10,000  | .       |
| The Anschutz Foundation           | American Enterprise Institute for Public Policy Research | .       | 5,000   | 10,000  | .       | 25,000  | 10,000  | 100,000 | .       |
| The Anschutz Foundation           | Americans for Prosperity Foundation                      | 7,500   | 7,500   | 5,000   | .       | 15,000  | 15,000  | .       | .       |
| The Anschutz Foundation           | Capital Research Center                                  | 10,000  | 10,000  | 15,000  | 10,000  | 10,000  | 10,000  | 15,000  | .       |
| The Anschutz Foundation           | Cato Institute                                           | .       | .       | .       | .       | 45,000  | 75,000  | 60,000  | .       |
| The Anschutz Foundation           | FreedomWorks Foundation                                  | .       | 10,000  | .       | .       | .       | 10,000  | 10,000  | .       |
| The Anschutz Foundation           | Heritage Foundation                                      | 15,000  | .       | .       | .       | 175,000 | 100,000 | .       | .       |
| The Anschutz Foundation           | Hoover Institution on War, Revolution and Peace          | .       | .       | .       | .       | .       | 15,000  | .       | .       |
| The Anschutz Foundation           | Independence Institute                                   | 35,000  | 1,000   | 25,000  | 50,000  | 40,000  | 25,000  | 85,000  | .       |
| The Anschutz Foundation           | Independent Institute                                    | .       | .       | .       | 10,000  | .       | .       | .       | .       |
| The Anschutz Foundation           | Independent Womens Forum                                 | .       | 10,000  | 7,500   | 5,000   | .       | 10,000  | 25,000  | .       |
| The Anschutz Foundation           | Landmark Legal Foundation                                | 15,000  | 10,000  | 15,000  | 15,000  | 15,000  | 20,000  | 20,000  | .       |
| The Anschutz Foundation           | Manhattan Institute for Policy Research                  | 100,000 | 50,000  | 50,000  | 100,000 | 50,000  | 75,000  | 75,000  | .       |
| The Anschutz Foundation           | Media Research Center                                    | 10,000  | 15,000  | 10,000  | 10,000  | 15,000  | 20,000  | 20,000  | .       |
| The Anschutz Foundation           | Mercatus Center                                          | 15,000  | 10,000  | 5,000   | .       | .       | 10,000  | 10,000  | .       |
| The Anschutz Foundation           | Mountain States Legal Foundation                         | .       | .       | .       | 10,000  | 15,000  | 10,000  | 50,000  | .       |
| The Anschutz Foundation           | National Center for Policy Analysis                      | 10,000  | 10,000  | .       | 10,000  | 30,000  | 15,000  | .       | .       |
| The Anschutz Foundation           | Pacific Research Institute for Public Policy             | 10,000  | 10,000  | 25,000  | 20,000  | 30,000  | 65,000  | 65,000  | .       |
| The Armstrong Foundation          | American Conservative Union Foundation                   | .       | .       | .       | .       | 50,000  | 20,000  | 5,000   | 5,000   |
| The Armstrong Foundation          | American Enterprise Institute for Public Policy Research | .       | .       | .       | .       | .       | 10,000  | 10,000  | 10,000  |
| The Armstrong Foundation          | American Legislative Exchange Council                    | 2,500   | .       | .       | 2,500   | 2,500   | .       | 2,500   | 2,500   |
| The Armstrong Foundation          | Americans for Prosperity Foundation                      | .       | .       | .       | 5,000   | 20,000  | 10,000  | .       | 10,000  |
| The Armstrong Foundation          | Capital Research Center                                  | 2,000   | .       | .       | 2,000   | 2,000   | .       | 2,000   | 2,000   |
| The Armstrong Foundation          | Cato Institute                                           | 5,000   | .       | 10,000  | 10,000  | 20,000  | 10,000  | .       | 10,000  |
| The Armstrong Foundation          | Committee for a Constructive Tomorrow                    | .       | .       | .       | .       | .       | .       | 5,000   | 5,000   |
| The Armstrong Foundation          | Competitive Enterprise Institute                         | 5,000   | .       | .       | 5,000   | 30,000  | 10,000  | 2,500   | 10,000  |
| The Armstrong Foundation          | Environmental Literacy Council                           | 5,000   | .       | .       | 2,500   | 2,500   | .       | .       | .       |
| The Armstrong Foundation          | FreedomWorks                                             | 2,000   | .       | .       | 20,000  | .       | .       | 15,000  | 20,000  |

| Foundation                  | Recipient                                                | 2003    | 2004   | 2005    | 2006    | 2007    | 2008    | 2009    | 2010    |
|-----------------------------|----------------------------------------------------------|---------|--------|---------|---------|---------|---------|---------|---------|
| The Armstrong Foundation    | FreedomWorks Foundation                                  | .       | .      | 10,000  | .       | 40,000  | 15,000  | .       | .       |
| The Armstrong Foundation    | Heartland Institute                                      | 2,500   | .      | .       | 5,000   | 5,000   | .       | 5,000   | 5,000   |
| The Armstrong Foundation    | Heritage Foundation                                      | 25,000  | 25,000 | 25,000  | 25,000  | 100,000 | 100,000 | 100,000 | 100,000 |
| The Armstrong Foundation    | Hudson Institute                                         | 5,000   | .      | .       | .       | .       | .       | .       | .       |
| The Armstrong Foundation    | Independent Institute                                    | 5,000   | .      | .       | .       | 5,000   | .       | 10,000  | 2,500   |
| The Armstrong Foundation    | Independent Womens Forum                                 | .       | .      | .       | 5,000   | .       | .       | .       | .       |
| The Armstrong Foundation    | Landmark Legal Foundation                                | 15,000  | .      | 15,000  | 15,000  | 30,000  | 15,000  | 20,000  | 40,000  |
| The Armstrong Foundation    | Manhattan Institute for Policy Research                  | 5,000   | .      | .       | 5,000   | 10,000  | .       | 5,000   | 5,000   |
| The Armstrong Foundation    | Media Research Center                                    | 5,500   | 25,000 | 25,000  | 25,000  | 60,000  | 25,000  | 30,000  | 25,000  |
| The Armstrong Foundation    | Mercatus Center                                          | 20,000  | 20,000 | 20,000  | .       | .       | .       | .       | 10,000  |
| The Armstrong Foundation    | Mountain States Legal Foundation                         | 7,500   | .      | .       | .       | 7,500   | .       | 5,000   | 20,000  |
| The Armstrong Foundation    | National Center for Policy Analysis                      | 45,000  | 45,000 | 45,000  | 45,000  | 60,000  | 20,000  | .       | 45,000  |
| The Armstrong Foundation    | National Center for Public Policy Research               | .       | .      | .       | 2,500   | .       | .       | .       | .       |
| The Armstrong Foundation    | National Taxpayers Union                                 | 10,000  | .      | 10,000  | 10,000  | .       | .       | 10,000  | .       |
| The Armstrong Foundation    | National Taxpayers Union Foundation                      | .       | .      | .       | .       | 40,000  | 15,000  | .       | .       |
| The Armstrong Foundation    | Pacific Research Institute for Public Policy             | 7,500   | .      | .       | 10,000  | 5,000   | .       | .       | .       |
| The Armstrong Foundation    | Reason Foundation                                        | 2,500   | .      | .       | 2,500   | 5,000   | .       | .       | 12,500  |
| The Armstrong Foundation    | Southeastern Legal Foundation                            | 5,000   | .      | .       | .       | .       | .       | .       | .       |
| The Armstrong Foundation    | State Policy Network                                     | .       | .      | .       | .       | 5,000   | 10,000  | 5,000   | 15,000  |
| The Armstrong Foundation    | Texas Public Policy Foundation                           | .       | .      | .       | 10,000  | 20,000  | 10,000  | 10,000  | 10,000  |
| The Atlantic Philanthropies | Cato Institute                                           | .       | .      | .       | .       | .       | 750,000 | .       | .       |
| The Bodman Foundation       | American Enterprise Institute for Public Policy Research | .       | .      | .       | 75,000  | .       | .       | .       | 50,000  |
| The Bodman Foundation       | Atlas Economic Research Foundation                       | .       | .      | 100,000 | .       | 125,000 | .       | .       | 50,000  |
| The Bodman Foundation       | Cato Institute                                           | .       | .      | .       | 35,000  | .       | .       | .       | .       |
| The Bodman Foundation       | Competitive Enterprise Institute                         | .       | .      | .       | 35,000  | .       | .       | .       | .       |
| The Bodman Foundation       | Environmental Literacy Council                           | 30,000  | .      | .       | .       | .       | .       | .       | .       |
| The Bodman Foundation       | Heartland Institute                                      | .       | .      | .       | 15,000  | .       | .       | .       | .       |
| The Bodman Foundation       | Hudson Institute                                         | .       | .      | .       | 15,000  | 75,000  | .       | 50,000  | 50,000  |
| The Bodman Foundation       | Independent Womens Forum                                 | .       | .      | 25,000  | .       | .       | .       | .       | .       |
| The Bodman Foundation       | Manhattan Institute for Policy Research                  | 100,000 | 35,000 | 165,000 | 100,000 | 125,000 | 75,000  | 40,000  | 50,000  |
| The Bodman Foundation       | Mercatus Center                                          | .       | .      | .       | .       | .       | .       | .       | .       |
| The Bodman Foundation       | National Center for Policy Analysis                      | .       | 50,000 | .       | .       | .       | .       | 50,000  | .       |
| The Bodman Foundation       | Pacific Research Institute for Public Policy             | .       | .      | .       | .       | .       | .       | 25,000  | .       |

| Foundation                                        | Recipient                                                         | 2003    | 2004    | 2005    | 2006    | 2007    | 2008    | 2009   | 2010   |
|---------------------------------------------------|-------------------------------------------------------------------|---------|---------|---------|---------|---------|---------|--------|--------|
| The Bristol-Myers Squibb Foundation, Inc.         | American Enterprise Institute for Public Policy Research          | 100,000 | 100,000 | 100,000 | 100,000 | 100,000 | 175,000 | .      | .      |
| The Bristol-Myers Squibb Foundation, Inc.         | Heritage Foundation                                               | 10,000  | 10,000  | 10,000  | 10,000  | .       | .       | .      | .      |
| The Bristol-Myers Squibb Foundation, Inc.         | Hudson Institute                                                  | .       | .       | .       | .       | .       | .       | 25,000 | .      |
| The Bristol-Myers Squibb Foundation, Inc.         | Manhattan Institute for Policy Research                           | 15,000  | 20,000  | 20,000  | 20,000  | .       | 20,000  | .      | .      |
| The Capital Group Companies Charitable Foundation | American Conservative Union Foundation                            | .       | .       | .       | .       | .       | 2,500   | .      | .      |
| The Capital Group Companies Charitable Foundation | American Enterprise Institute for Public Policy Research          | .       | .       | .       | .       | 6,000   | .       | .      | .      |
| The Capital Group Companies Charitable Foundation | Cato Institute                                                    | .       | .       | .       | 5,000   | .       | .       | .      | 240    |
| The Capital Group Companies Charitable Foundation | Heritage Foundation                                               | .       | .       | .       | 5,000   | 1,000   | 2,500   | 6,000  | .      |
| The Capital Group Companies Charitable Foundation | Hudson Institute                                                  | 115,000 | 115,800 | 76,800  | 98,600  | 46,200  | .       | 10,000 | 5,000  |
| The Capital Group Companies Charitable Foundation | Reason Foundation                                                 | .       | .       | .       | 5,000   | .       | .       | .      | .      |
| The Carson Family Charitable Trust                | American Enterprise Institute for Public Policy Research          | 20,000  | 100,000 | 100,000 | 100,000 | 100,000 | 100,000 | .      | .      |
| The Carson Family Charitable Trust                | Manhattan Institute for Policy Research                           | 10,000  | 25,000  | 25,000  | 25,000  | 25,000  | 25,000  | .      | .      |
| The Challenge Foundation                          | Americans for Prosperity Foundation                               | .       | .       | .       | .       | .       | 250,000 | 67,600 | .      |
| The Challenge Foundation                          | Atlas Economic Research Foundation                                | .       | .       | .       | .       | .       | 10,000  | .      | .      |
| The Challenge Foundation                          | Cascade Policy Institute                                          | .       | .       | .       | 41,075  | 33,293  | 105,000 | .      | 40,000 |
| The Challenge Foundation                          | Cato Institute                                                    | .       | .       | .       | .       | 100,000 | 125,000 | 50,000 | 50,000 |
| The Challenge Foundation                          | Committee for a Constructive Tomorrow                             | .       | .       | .       | .       | .       | .       | 10,000 | .      |
| The Challenge Foundation                          | Competitive Enterprise Institute                                  | .       | .       | .       | .       | .       | .       | 15,000 | 15,000 |
| The Challenge Foundation                          | FreedomWorks                                                      | .       | .       | .       | .       | .       | .       | 20,000 | 20,000 |
| The Challenge Foundation                          | FreedomWorks Foundation                                           | .       | .       | .       | .       | .       | 10,000  | .      | .      |
| The Challenge Foundation                          | Heartland Institute                                               | .       | .       | .       | .       | .       | .       | 5,000  | .      |
| The Challenge Foundation                          | Heritage Foundation                                               | .       | .       | .       | .       | .       | 10,000  | 25,000 | 25,000 |
| The Challenge Foundation                          | Institute for Energy Research                                     | .       | .       | .       | .       | .       | .       | 10,000 | .      |
| The Challenge Foundation                          | Manhattan Institute for Policy Research                           | .       | .       | .       | .       | .       | 10,000  | 5,000  | 5,000  |
| The Challenge Foundation                          | Mercatus Center                                                   | .       | .       | .       | .       | .       | .       | .      | 25,000 |
| The Challenge Foundation                          | Reason Foundation                                                 | .       | .       | .       | .       | .       | 5,000   | 5,000  | 5,000  |
| The Chisholm Foundation                           | American Enterprise Institute for Public Policy Research          | 15,000  | .       | 25,000  | 50,000  | .       | .       | 10,000 | 15,000 |
| The Chisholm Foundation                           | Heritage Foundation                                               | 15,000  | 10,000  | 15,000  | .       | .       | .       | 10,000 | 15,000 |
| The Chisholm Foundation                           | Hudson Institute                                                  | .       | .       | .       | .       | .       | .       | 25,000 | 25,000 |
| The Chisholm Foundation                           | Manhattan Institute for Policy Research                           | 85,000  | 85,000  | 85,000  | 85,000  | .       | .       | 85,000 | 90,000 |
| The Chisholm Foundation                           | National Center for Policy Analysis                               | 50,000  | 50,000  | 50,000  | 50,000  | .       | .       | .      | .      |
| The Chrysler Foundation                           | American Council for Capital Formation Center for Policy Research | .       | 10,000  | 10,000  | .       | .       | .       | .      | .      |

| Foundation                                                   | Recipient                                                | 2003    | 2004    | 2005    | 2006    | 2007    | 2008    | 2009    | 2010    |
|--------------------------------------------------------------|----------------------------------------------------------|---------|---------|---------|---------|---------|---------|---------|---------|
| The Chrysler Foundation                                      | American Enterprise Institute for Public Policy Research | .       | .       | 50,000  | 15,000  | 15,000  | .       | .       | .       |
| The Chrysler Foundation                                      | Annapolis Center for Science-Based Public Policy         | .       | .       | 10,000  | .       | .       | .       | .       | .       |
| The Chrysler Foundation                                      | Competitive Enterprise Institute                         | .       | 35,000  | 50,000  | 50,000  | .       | .       | .       | .       |
| The Chrysler Foundation                                      | George C. Marshall Institute                             | .       | .       | 5,000   | .       | .       | .       | .       | .       |
| The Chrysler Foundation                                      | Heartland Institute                                      | .       | 40,000  | 40,000  | 25,000  | .       | .       | .       | .       |
| The Chrysler Foundation                                      | Manhattan Institute for Policy Research                  | .       | 100,000 | 50,000  | .       | 25,000  | .       | .       | .       |
| The Chrysler Foundation                                      | National Center for Policy Analysis                      | 15,000  | 15,000  | .       | .       | .       | .       | .       | .       |
| The Chrysler Foundation                                      | National Center for Public Policy Research               | 30,000  | 30,000  | .       | .       | .       | .       | .       | .       |
| The Chrysler Foundation                                      | Pacific Research Institute for Public Policy             | .       | .       | .       | 50,000  | .       | 50,000  | .       | .       |
| The Chrysler Foundation                                      | Reason Foundation                                        | 10,000  | 10,000  | 10,000  | 10,000  | 10,000  | 10,000  | .       | .       |
| The Community Foundation Serving Richmond & Central Virginia | Americans for Prosperity Foundation                      | .       | .       | .       | .       | 100,000 | .       | 350,000 | .       |
| The Community Foundation Serving Richmond & Central Virginia | Cato Institute                                           | .       | .       | .       | .       | 5,000   | 5,000   | 5,000   | .       |
| The Community Foundation Serving Richmond & Central Virginia | Competitive Enterprise Institute                         | .       | .       | .       | .       | .       | .       | 5,000   | .       |
| The Community Foundation Serving Richmond & Central Virginia | Heritage Foundation                                      | .       | .       | .       | .       | 5,000   | 10,000  | 10,000  | .       |
| The Community Foundation Serving Richmond & Central Virginia | Media Research Center                                    | .       | .       | .       | .       | 1,000   | .       | 2,000   | .       |
| The E. L. Craig Foundation                                   | Americans for Prosperity Foundation                      | .       | .       | .       | .       | .       | 50,000  | 50,000  | 100,000 |
| The E. L. Craig Foundation                                   | Cato Institute                                           | 100,000 | 100,000 | .       | 100,000 | 100,000 | 100,000 | 30,500  | 200,000 |
| The E. L. Craig Foundation                                   | Competitive Enterprise Institute                         | .       | .       | .       | .       | .       | 5,000   | .       | .       |
| The E. L. Craig Foundation                                   | Heartland Institute                                      | .       | 5,000   | 5,000   | .       | .       | .       | .       | .       |
| The E. L. Craig Foundation                                   | Landmark Legal Foundation                                | 25,000  | 25,000  | 25,000  | 25,000  | .       | .       | .       | .       |
| The E. L. Craig Foundation                                   | Mercatus Center                                          | .       | .       | 25,000  | .       | .       | .       | .       | .       |
| The E. L. Craig Foundation                                   | Reason Foundation                                        | .       | .       | 25,000  | 25,000  | 50,000  | 50,000  | .       | 50,000  |
| The E. L. Craig Foundation                                   | State Policy Network                                     | .       | 5,000   | .       | .       | .       | .       | .       | .       |
| The Gordon and Mary Cain Foundation                          | Americans for Prosperity Foundation                      | 20,000  | .       | .       | .       | .       | .       | .       | .       |
| The Gordon and Mary Cain Foundation                          | Capital Research Center                                  | .       | 2,000   | .       | .       | .       | .       | .       | .       |
| The Gordon and Mary Cain Foundation                          | National Center for Policy Analysis                      | 20,000  | 25,000  | 25,000  | 20,000  | .       | .       | .       | .       |
| The Gordon and Mary Cain Foundation                          | National Center for Public Policy Research               | .       | 10,000  | 15,000  | 10,000  | .       | .       | .       | .       |
| The Gordon and Mary Cain Foundation                          | National Taxpayers Union Foundation                      | .       | 10,000  | 10,000  | 10,000  | .       | .       | .       | .       |
| The Gordon and Mary Cain Foundation                          | Texas Public Policy Foundation                           | 25,000  | .       | 50,000  | 50,000  | .       | .       | .       | .       |
| The Grover Hermann Foundation                                | Capital Research Center                                  | 15,000  | 15,000  | 15,000  | .       | 20,000  | .       | .       | .       |
| The Grover Hermann Foundation                                | Cato Institute                                           | .       | 7,500   | 7,500   | 7,500   | 5,000   | .       | .       | .       |
| The Grover Hermann Foundation                                | Heartland Institute                                      | .       | 10,000  | 10,000  | .       | .       | .       | .       | .       |
| The Grover Hermann Foundation                                | Heritage Foundation                                      | 200,000 | 200,000 | 225,000 | 225,000 | .       | .       | .       | .       |

| Foundation                                       | Recipient                                                | 2003    | 2004    | 2005    | 2006    | 2007    | 2008    | 2009    | 2010    |
|--------------------------------------------------|----------------------------------------------------------|---------|---------|---------|---------|---------|---------|---------|---------|
| The Grover Hermann Foundation                    | Independent Womens Forum                                 | .       | .       | 10,000  | 10,000  | 10,000  | .       | .       | .       |
| The Grover Hermann Foundation                    | Media Research Center                                    | .       | 5,000   | 5,000   | 5,000   | .       | .       | .       | .       |
| The Grover Hermann Foundation                    | Reason Foundation                                        | 15,000  | 15,000  | 15,000  | 15,000  | .       | .       | .       | .       |
| The Grover Hermann Foundation                    | State Policy Network                                     | .       | 10,000  | .       | .       | .       | .       | 10,000  | 10,000  |
| The Harry and Jeanette Weinberg Foundation, Inc. | Cato Institute                                           | .       | 200,000 | .       | .       | .       | .       | .       | .       |
| The Harry and Jeanette Weinberg Foundation, Inc. | Heritage Foundation                                      | 200,000 | .       | .       | .       | .       | .       | .       | .       |
| The Hofmann Family Foundation                    | Hoover Institution on War, Revolution and Peace          | 100,000 | .       | 250,000 | 100,000 | 100,000 | 100,000 | .       | 100,000 |
| The J. M. Kaplan Fund, Inc.                      | Atlas Economic Research Foundation                       | 135,000 | 125,000 | 125,000 | 125,000 | 150,000 | 200,000 | 180,000 | .       |
| The J. M. Kaplan Fund, Inc.                      | Cato Institute                                           | 20,000  | .       | .       | .       | .       | .       | .       | .       |
| The J. M. Kaplan Fund, Inc.                      | Manhattan Institute for Policy Research                  | 125,000 | 150,000 | 225,000 | 100,000 | 100,000 | 100,000 | 100,000 | .       |
| The Jean I. & Charles H. Brunie Foundation       | American Enterprise Institute for Public Policy Research | .       | 25,000  | .       | .       | .       | .       | .       | .       |
| The Jean I. & Charles H. Brunie Foundation       | Cato Institute                                           | .       | .       | 25,000  | 25,000  | .       | .       | .       | .       |
| The Jean I. & Charles H. Brunie Foundation       | Competitive Enterprise Institute                         | .       | 10,000  | 10,000  | .       | .       | .       | .       | .       |
| The Jean I. & Charles H. Brunie Foundation       | Hudson Institute                                         | .       | 50,000  | 10,000  | 122,890 | 16,400  | 91,800  | .       | .       |
| The Jean I. & Charles H. Brunie Foundation       | International Policy Network - U.S.                      | .       | 5,000   | 1,000   | .       | .       | .       | .       | .       |
| The Jean I. & Charles H. Brunie Foundation       | Manhattan Institute for Policy Research                  | 35,000  | 50,000  | .       | 23,200  | 25,000  | .       | .       | .       |
| The Jean I. & Charles H. Brunie Foundation       | National Center for Policy Analysis                      | 25,000  | 36,500  | 30,000  | 35,000  | .       | .       | .       | .       |
| The Jean I. & Charles H. Brunie Foundation       | Pacific Research Institute for Public Policy             | 5,000   | 5,000   | 5,000   | .       | .       | .       | .       | .       |
| The Jeld-Wen Foundation                          | Atlas Economic Research Foundation                       | 5,000   | 10,000  | 10,000  | .       | .       | .       | .       | .       |
| The Jeld-Wen Foundation                          | Cascade Policy Institute                                 | 50,000  | 60,000  | 45,000  | .       | 40,000  | .       | .       | .       |
| The Jeld-Wen Foundation                          | Cato Institute                                           | 10,000  | 10,000  | 10,000  | .       | 10,000  | .       | .       | .       |
| The Jeld-Wen Foundation                          | FreedomWorks Foundation                                  | .       | .       | 200,000 | .       | 100,000 | .       | .       | .       |
| The Jeld-Wen Foundation                          | Heritage Foundation                                      | 10,000  | 10,000  | 10,000  | .       | 10,000  | .       | .       | .       |
| The Jeld-Wen Foundation                          | Hoover Institution on War, Revolution and Peace          | 10,000  | 10,000  | 10,000  | .       | 10,000  | .       | .       | .       |
| The Jeld-Wen Foundation                          | Independence Institute                                   | 5,000   | .       | 5,000   | .       | .       | .       | .       | .       |
| The Jeld-Wen Foundation                          | Independent Institute                                    | 10,000  | .       | .       | .       | .       | .       | .       | .       |
| The Jeld-Wen Foundation                          | Landmark Legal Foundation                                | 10,000  | 10,000  | 10,000  | .       | .       | .       | .       | .       |
| The Jeld-Wen Foundation                          | Mercatus Center                                          | 10,000  | .       | 10,000  | .       | .       | .       | .       | .       |
| The Jeld-Wen Foundation                          | National Center for Policy Analysis                      | 50,000  | 50,000  | 50,000  | .       | 50,000  | .       | .       | .       |
| The Jeld-Wen Foundation                          | Reason Foundation                                        | 10,000  | 10,000  | 10,000  | .       | .       | .       | .       | .       |
| The Jeld-Wen Foundation                          | State Policy Network                                     | 15,000  | 15,000  | 15,000  | .       | 10,000  | .       | .       | .       |
| The Jeld-Wen Foundation                          | Texas Public Policy Foundation                           | .       | .       | 10,000  | .       | 10,000  | .       | .       | .       |
| The JM Foundation                                | American Enterprise Institute for Public Policy Research | .       | .       | .       | .       | .       | .       | .       | 40,000  |

| Foundation                                        | Recipient                                                | 2003    | 2004    | 2005    | 2006   | 2007    | 2008    | 2009      | 2010      |
|---------------------------------------------------|----------------------------------------------------------|---------|---------|---------|--------|---------|---------|-----------|-----------|
| The JM Foundation                                 | American Legislative Exchange Council                    | .       | .       | .       | .      | .       | .       | 25,000    | .         |
| The JM Foundation                                 | Americans for Prosperity Foundation                      | .       | .       | 25,000  | .      | .       | 10,000  | .         | .         |
| The JM Foundation                                 | Atlas Economic Research Foundation                       | .       | 35,000  | .       | 35,000 | .       | .       | .         | 30,000    |
| The JM Foundation                                 | Cascade Policy Institute                                 | .       | .       | .       | 25,000 | .       | 25,000  | .         | .         |
| The JM Foundation                                 | Cato Institute                                           | .       | .       | 25,000  | .      | .       | .       | .         | .         |
| The JM Foundation                                 | Free Enterprise Education Institute                      | .       | .       | .       | .      | 5,000   | .       | .         | .         |
| The JM Foundation                                 | FreedomWorks                                             | .       | .       | .       | 40,000 | .       | .       | .         | .         |
| The JM Foundation                                 | FreedomWorks Foundation                                  | .       | .       | .       | .      | .       | 40,000  | .         | .         |
| The JM Foundation                                 | Heritage Foundation                                      | 25,000  | .       | 25,000  | .      | .       | .       | .         | 25,000    |
| The JM Foundation                                 | Hoover Institution on War, Revolution and Peace          | .       | 30,000  | 30,000  | .      | .       | 40,000  | 40,000    | 40,000    |
| The JM Foundation                                 | Independence Institute                                   | .       | .       | .       | .      | .       | .       | 20,000    | .         |
| The JM Foundation                                 | Independent Institute                                    | .       | .       | 20,000  | .      | .       | .       | .         | .         |
| The JM Foundation                                 | James Madison Institute for Public Policy Studies        | .       | .       | 20,000  | .      | .       | .       | 25,000    | .         |
| The JM Foundation                                 | John Locke Foundation                                    | .       | .       | .       | .      | .       | .       | 25,000    | .         |
| The JM Foundation                                 | Manhattan Institute for Policy Research                  | .       | .       | 35,000  | .      | .       | 40,000  | .         | 50,000    |
| The JM Foundation                                 | Mercatus Center                                          | .       | .       | .       | .      | .       | .       | 25,000    | .         |
| The JM Foundation                                 | National Center for Policy Analysis                      | .       | .       | .       | .      | .       | 35,000  | 25,000    | .         |
| The JM Foundation                                 | National Taxpayers Union                                 | .       | .       | .       | .      | .       | .       | .         | 25,000    |
| The JM Foundation                                 | National Taxpayers Union Foundation                      | .       | .       | .       | .      | 25,000  | .       | .         | .         |
| The JM Foundation                                 | Pacific Research Institute for Public Policy             | .       | .       | 25,000  | .      | .       | .       | .         | .         |
| The JM Foundation                                 | Reason Foundation                                        | .       | .       | 20,000  | .      | .       | 20,000  | .         | .         |
| The JM Foundation                                 | State Policy Network                                     | 50,000  | 75,000  | .       | .      | .       | 75,000  | 75,000    | 75,000    |
| The JM Foundation                                 | Texas Public Policy Foundation                           | .       | .       | .       | 20,000 | .       | .       | 25,000    | .         |
| The JM Foundation                                 | Thomas Jefferson Institute for Public Policy             | .       | .       | .       | .      | .       | 25,000  | 25,000    | .         |
| The JM Foundation                                 | Washington Policy Center                                 | 20,000  | .       | .       | 20,000 | .       | 25,000  | .         | .         |
| The John D. and Catherine T. MacArthur Foundation | American Enterprise Institute for Public Policy Research | 50,000  | .       | .       | .      | .       | .       | .         | .         |
| The John D. and Catherine T. MacArthur Foundation | Hudson Institute                                         | .       | .       | .       | .      | 600,000 | .       | .         | 525,000   |
| The Kern Family Foundation, Inc.                  | American Enterprise Institute for Public Policy Research | .       | .       | .       | .      | .       | .       | 1,039,490 | 1,071,912 |
| The Kern Family Foundation, Inc.                  | Americans for Prosperity Foundation                      | .       | .       | .       | .      | .       | 30,000  | .         | .         |
| The Kern Family Foundation, Inc.                  | Cato Institute                                           | 100,000 | 100,000 | 100,000 | .      | .       | .       | .         | .         |
| The Kern Family Foundation, Inc.                  | Heartland Institute                                      | .       | 10,000  | 15,000  | .      | .       | .       | .         | .         |
| The Kern Family Foundation, Inc.                  | Heritage Foundation                                      | .       | .       | .       | .      | .       | 381,523 | 265,512   | .         |
| The Kern Family Foundation, Inc.                  | Manhattan Institute for Policy Research                  | 75,000  | .       | 150,000 | .      | .       | .       | .         | .         |

| Foundation                                   | Recipient                                                            | 2003      | 2004      | 2005      | 2006    | 2007    | 2008      | 2009      | 2010      |
|----------------------------------------------|----------------------------------------------------------------------|-----------|-----------|-----------|---------|---------|-----------|-----------|-----------|
| The Kern Family Foundation, Inc.             | Pacific Research Institute for Public Policy                         | .         | .         | .         | .       | .       | 130,000   | .         | .         |
| The Kern Family Foundation, Inc.             | Thomas Jefferson Institute for Public Policy                         | .         | .         | 20,000    | .       | .       | .         | .         | .         |
| The Kovner Foundation                        | American Enterprise Institute for Public Policy Research             | 1,677,734 | 1,299,301 | 1,300,000 | 300,000 | 300,000 | 1,300,000 | 3,300,000 | 3,300,000 |
| The Lynde and Harry Bradley Foundation, Inc. | American Conservative Union Foundation                               | 25,000    | .         | 35,000    | 35,000  | 65,000  | 80,000    | 50,000    | 50,000    |
| The Lynde and Harry Bradley Foundation, Inc. | American Enterprise Institute for Public Policy Research             | 625,000   | 625,000   | 500,000   | 520,000 | 525,000 | 445,000   | 370,000   | 470,000   |
| The Lynde and Harry Bradley Foundation, Inc. | American Legislative Exchange Council                                | .         | .         | .         | .       | .       | .         | 50,000    | 95,000    |
| The Lynde and Harry Bradley Foundation, Inc. | Americans for Prosperity Foundation                                  | .         | 25,000    | 100,000   | 25,000  | 25,000  | 25,000    | 20,000    | 500,000   |
| The Lynde and Harry Bradley Foundation, Inc. | Atlas Economic Research Foundation                                   | .         | .         | 20,000    | 25,000  | 25,000  | 5,000     | 5,000     | 5,000     |
| The Lynde and Harry Bradley Foundation, Inc. | Capital Research Center                                              | 130,000   | 85,000    | 105,000   | 110,000 | 165,000 | 85,000    | 90,000    | 105,000   |
| The Lynde and Harry Bradley Foundation, Inc. | Cascade Policy Institute                                             | .         | .         | 5,000     | 10,000  | 10,000  | .         | .         | .         |
| The Lynde and Harry Bradley Foundation, Inc. | Cato Institute                                                       | 100,000   | 75,000    | 125,000   | 100,000 | 345,000 | 225,000   | 225,000   | 125,000   |
| The Lynde and Harry Bradley Foundation, Inc. | Center for the Study of Carbon Dioxide and Global Change/CO2 Science | .         | .         | .         | .       | .       | .         | 50,000    | .         |
| The Lynde and Harry Bradley Foundation, Inc. | Competitive Enterprise Institute                                     | 50,000    | 50,000    | 125,000   | 125,000 | 135,000 | 35,000    | 75,000    | 65,000    |
| The Lynde and Harry Bradley Foundation, Inc. | FreedomWorks Foundation                                              | 10,000    | 40,000    | 25,000    | 5,000   | 80,000  | 25,000    | 105,000   | 150,000   |
| The Lynde and Harry Bradley Foundation, Inc. | George C. Marshall Institute                                         | 115,000   | 115,000   | 105,000   | 105,000 | 110,000 | 110,000   | 90,000    | 90,000    |
| The Lynde and Harry Bradley Foundation, Inc. | Heartland Institute                                                  | 105,000   | 125,000   | 105,000   | 100,000 | 75,000  | 25,000    | 125,000   | 150,000   |
| The Lynde and Harry Bradley Foundation, Inc. | Heritage Foundation                                                  | 322,500   | 375,000   | 435,000   | 290,000 | 340,000 | 245,000   | 228,500   | 225,000   |
| The Lynde and Harry Bradley Foundation, Inc. | Hoover Institution on War, Revolution and Peace                      | 330,000   | 355,000   | 305,000   | 385,000 | 280,000 | 305,000   | 280,000   | 380,000   |
| The Lynde and Harry Bradley Foundation, Inc. | Hudson Institute                                                     | 446,100   | 589,100   | 665,000   | 820,000 | 990,000 | 1,015,000 | 905,000   | 965,000   |
| The Lynde and Harry Bradley Foundation, Inc. | Independence Institute                                               | .         | 75,000    | 75,000    | 50,000  | 175,000 | 100,000   | 50,000    | 150,000   |
| The Lynde and Harry Bradley Foundation, Inc. | Independent Womens Forum                                             | 20,000    | 25,000    | 25,000    | 35,000  | 30,000  | 25,000    | .         | .         |
| The Lynde and Harry Bradley Foundation, Inc. | James Madison Institute for Public Policy Studies                    | .         | .         | .         | .       | .       | 15,000    | .         | .         |
| The Lynde and Harry Bradley Foundation, Inc. | Landmark Legal Foundation                                            | 20,000    | 20,000    | 70,000    | 35,000  | 60,000  | .         | 5,000     | 5,000     |
| The Lynde and Harry Bradley Foundation, Inc. | Manhattan Institute for Policy Research                              | 250,000   | 365,000   | 320,000   | 295,000 | 345,000 | 330,000   | 330,000   | 435,000   |
| The Lynde and Harry Bradley Foundation, Inc. | Media Research Center                                                | 250,000   | 250,000   | 275,000   | 275,000 | 275,000 | 25,000    | 125,000   | 275,000   |
| The Lynde and Harry Bradley Foundation, Inc. | Mercatus Center                                                      | 10,000    | 10,000    | 10,000    | .       | 10,000  | .         | .         | .         |
| The Lynde and Harry Bradley Foundation, Inc. | Mountain States Legal Foundation                                     | 10,000    | 10,000    | .         | .       | .       | .         | .         | .         |
| The Lynde and Harry Bradley Foundation, Inc. | National Center for Policy Analysis                                  | 157,500   | 145,000   | 195,000   | 95,000  | 140,000 | 170,000   | 160,000   | 150,000   |
| The Lynde and Harry Bradley Foundation, Inc. | National Taxpayers Union Foundation                                  | 2,500     | 2,500     | 5,000     | 5,000   | 5,000   | .         | 30,000    | 5,000     |
| The Lynde and Harry Bradley Foundation, Inc. | Pacific Research Institute for Public Policy                         | 25,000    | 25,000    | 100,000   | .       | 75,000  | 101,000   | 50,000    | 45,000    |



| Foundation                                     | Recipient                                                | 2003    | 2004    | 2005    | 2006    | 2007      | 2008      | 2009      | 2010      |
|------------------------------------------------|----------------------------------------------------------|---------|---------|---------|---------|-----------|-----------|-----------|-----------|
| The Lynde and Harry Bradley Foundation, Inc.   | Reason Foundation                                        | 5,000   | 64,000  | 5,000   | 5,000   | 5,000     | .         | 100,000   | 50,000    |
| The Lynde and Harry Bradley Foundation, Inc.   | Science and Public Policy Institute                      | .       | .       | .       | .       | .         | .         | .         | 25,000    |
| The Lynde and Harry Bradley Foundation, Inc.   | Southeastern Legal Foundation                            | 11,000  | 1,000   | 1,000   | 1,000   | 1,000     | .         | 50,000    | 25,000    |
| The Lynde and Harry Bradley Foundation, Inc.   | State Policy Network                                     | .       | .       | 40,000  | .       | 15,000    | .         | 25,000    | 30,000    |
| The Lynde and Harry Bradley Foundation, Inc.   | Texas Public Policy Foundation                           | .       | .       | .       | .       | .         | .         | .         | 40,000    |
| The Marcus Foundation, Inc.                    | American Enterprise Institute for Public Policy Research | .       | .       | .       | .       | 10,000    | .         | 50,000    | .         |
| The Marcus Foundation, Inc.                    | Americans for Prosperity Foundation                      | .       | .       | .       | .       | .         | .         | .         | 1,000     |
| The Marcus Foundation, Inc.                    | Cato Institute                                           | .       | .       | .       | .       | .         | .         | .         | 5,000     |
| The Marcus Foundation, Inc.                    | Heritage Foundation                                      | .       | .       | 5,000   | .       | .         | .         | .         | 5,000     |
| The Marcus Foundation, Inc.                    | Hoover Institution on War, Revolution and Peace          | .       | 5,000   | 5,000   | 15,000  | .         | .         | .         | .         |
| The Marcus Foundation, Inc.                    | Hudson Institute                                         | .       | .       | .       | .       | 85,000    | 85,000    | .         | .         |
| The Marcus Foundation, Inc.                    | Landmark Legal Foundation                                | 1,000   | .       | .       | .       | .         | .         | .         | .         |
| The Marcus Foundation, Inc.                    | Manhattan Institute for Policy Research                  | .       | .       | 1,000   | 1,000   | .         | .         | .         | .         |
| The Marcus Foundation, Inc.                    | National Center for Policy Analysis                      | .       | .       | .       | .       | .         | .         | .         | 1,500     |
| The Marcus Foundation, Inc.                    | Southeastern Legal Foundation                            | .       | .       | .       | .       | .         | 25,000    | 250,000   | .         |
| The MeadWestvaco Foundation                    | American Enterprise Institute for Public Policy Research | 100,000 | 125,000 | 125,000 | 100,000 | .         | 525,000   | 525,000   | 1,500,000 |
| The MeadWestvaco Foundation                    | Heritage Foundation                                      | 25,000  | .       | .       | 25,000  | .         | 25,000    | 25,000    | .         |
| The Paul Singer Family Foundation              | American Enterprise Institute for Public Policy Research | .       | 10,000  | .       | .       | .         | .         | .         | .         |
| The Paul Singer Family Foundation              | Competitive Enterprise Institute                         | 20,000  | 20,000  | .       | .       | .         | .         | .         | .         |
| The Paul Singer Family Foundation              | Hudson Institute                                         | 25,000  | .       | .       | .       | .         | .         | .         | .         |
| The Paul Singer Family Foundation              | Manhattan Institute for Policy Research                  | 90,000  | 150,000 | .       | .       | .         | .         | 275,000   | .         |
| The Paul Singer Family Foundation              | National Center for Policy Analysis                      | 10,000  | 10,000  | .       | .       | .         | .         | .         | .         |
| The Pew Charitable Trusts                      | Hudson Institute                                         | .       | .       | .       | 650,000 | .         | .         | .         | .         |
| The Richard and Helen DeVos Foundation         | American Enterprise Institute for Public Policy Research | 7,500   | 5,000   | 10,000  | 10,000  | 15,000    | 15,000    | 115,000   | 150,000   |
| The Richard and Helen DeVos Foundation         | FreedomWorks                                             | .       | .       | .       | .       | .         | .         | .         | 250,000   |
| The Richard and Helen DeVos Foundation         | FreedomWorks Foundation                                  | .       | .       | .       | .       | 100,000   | 100,000   | 250,000   | .         |
| The Richard and Helen DeVos Foundation         | Heritage Foundation                                      | 100,000 | 600,000 | 600,000 | 600,000 | 1,000,000 | 3,000,000 | 1,000,000 | 300,000   |
| The Richard and Helen DeVos Foundation         | Media Research Center                                    | 100,000 | 100,000 | 100,000 | 200,000 | 100,000   | 100,000   | 100,000   | 1,000,000 |
| The Richard Seth Staley Educational Foundation | Atlas Economic Research Foundation                       | 3,415   | .       | .       | .       | .         | .         | .         | 100       |
| The Richard Seth Staley Educational Foundation | Capital Research Center                                  | 500     | .       | .       | .       | .         | .         | .         | 100       |
| The Richard Seth Staley Educational Foundation | Cato Institute                                           | 2,000   | 1,953   | 2,500   | 6,000   | 6,000     | 3,000     | .         | .         |
| The Richard Seth Staley Educational Foundation | Heritage Foundation                                      | 82,257  | .       | 149,000 | 160,000 | 150,000   | 100,775   | 91,350    | 76,620    |

| Foundation                                     | Recipient                                                | 2003    | 2004    | 2005    | 2006   | 2007    | 2008    | 2009    | 2010    |
|------------------------------------------------|----------------------------------------------------------|---------|---------|---------|--------|---------|---------|---------|---------|
| The Richard Seth Staley Educational Foundation | Hoover Institution on War, Revolution and Peace          | 250     | .       | .       | 1,000  | .       | .       | .       | .       |
| The Richard Seth Staley Educational Foundation | Reason Foundation                                        | 2,500   | .       | 4,000   | 5,000  | .       | .       | .       | 100     |
| The Richard Seth Staley Educational Foundation | State Policy Network                                     | .       | .       | .       | .      | .       | .       | .       | 4,783   |
| The Richard Seth Staley Educational Foundation | Washington Policy Center                                 | .       | 2,000   | 2,000   | 2,000  | 2,500   | 2,500   | 2,500   | .       |
| The Robert Wood Johnson Foundation             | Hudson Institute                                         | .       | .       | .       | .      | .       | .       | .       | 399,900 |
| The Robert Wood Johnson Foundation             | Manhattan Institute for Policy Research                  | .       | .       | .       | 30,000 | .       | .       | .       | .       |
| The Roberts Foundation                         | American Enterprise Institute for Public Policy Research | 150,000 | 200,000 | 150,000 | .      | 200,000 | 100,000 | 50,000  | 500,000 |
| The Rodney Fund                                | Americans for Prosperity Foundation                      | .       | .       | .       | .      | .       | 4,000   | .       | .       |
| The Rodney Fund                                | Capital Research Center                                  | 4,000   | .       | .       | .      | .       | 3,000   | 3,000   | .       |
| The Rodney Fund                                | Cato Institute                                           | 100,000 | 75,065  | 127,750 | 76,000 | .       | 102,000 | 85,000  | .       |
| The Rodney Fund                                | Competitive Enterprise Institute                         | 3,000   | 6,000   | .       | .      | .       | .       | 7,000   | .       |
| The Rodney Fund                                | FreedomWorks                                             | 9,000   | 11,000  | .       | .      | .       | .       | 2,000   | .       |
| The Rodney Fund                                | Heartland Institute                                      | 12,000  | 9,000   | 15,000  | 12,000 | .       | 12,000  | 8,000   | .       |
| The Rodney Fund                                | Heritage Foundation                                      | 8,000   | 9,000   | .       | .      | .       | .       | .       | .       |
| The Rodney Fund                                | Independent Institute                                    | 2,000   | 2,000   | 19,000  | 43,925 | .       | 43,000  | 40,000  | .       |
| The Rodney Fund                                | Mercatus Center                                          | 7,000   | 6,000   | 13,000  | 8,000  | .       | 2,000   | 8,000   | .       |
| The Rodney Fund                                | Reason Foundation                                        | 8,000   | 6,000   | 15,000  | 13,000 | .       | 21,000  | 7,000   | .       |
| The Rodney Fund                                | State Policy Network                                     | .       | 1,000   | 6,000   | 8,000  | .       | 4,000   | .       | .       |
| The Roe Foundation                             | American Legislative Exchange Council                    | 2,500   | .       | 2,500   | .      | .       | .       | .       | .       |
| The Roe Foundation                             | Atlas Economic Research Foundation                       | 25,000  | 20,000  | 20,000  | 25,000 | 25,000  | .       | 30,000  | 30,000  |
| The Roe Foundation                             | Capital Research Center                                  | 10,000  | .       | 10,000  | 10,000 | 10,000  | .       | .       | .       |
| The Roe Foundation                             | Cascade Policy Institute                                 | 20,000  | .       | 25,000  | 25,000 | 50,000  | .       | 30,000  | 20,000  |
| The Roe Foundation                             | Cato Institute                                           | 5,000   | .       | 5,000   | .      | 10,000  | .       | 15,000  | 10,000  |
| The Roe Foundation                             | Competitive Enterprise Institute                         | 10,000  | .       | 10,000  | .      | 10,000  | .       | .       | .       |
| The Roe Foundation                             | Consumer Alert                                           | .       | .       | 5,000   | .      | .       | .       | .       | .       |
| The Roe Foundation                             | FreedomWorks                                             | 2,500   | .       | .       | .      | .       | .       | .       | .       |
| The Roe Foundation                             | Heartland Institute                                      | .       | .       | 5,000   | .      | .       | .       | .       | .       |
| The Roe Foundation                             | Heritage Foundation                                      | 75,000  | 75,000  | 80,000  | 80,000 | .       | .       | 100,000 | 100,000 |
| The Roe Foundation                             | Independence Institute                                   | 20,000  | .       | 25,000  | 25,000 | 25,000  | .       | 30,000  | 25,000  |
| The Roe Foundation                             | Independent Womens Forum                                 | 5,000   | .       | 5,000   | .      | .       | .       | .       | .       |
| The Roe Foundation                             | James Madison Institute for Public Policy Studies        | 20,000  | .       | .       | 25,000 | 30,000  | .       | 30,000  | 25,000  |
| The Roe Foundation                             | John Locke Foundation                                    | 20,000  | .       | 25,000  | 25,000 | 25,000  | .       | 25,000  | .       |
| The Roe Foundation                             | Landmark Legal Foundation                                | 2,500   | .       | .       | .      | .       | .       | .       | .       |

| Foundation                                | Recipient                                                | 2003    | 2004      | 2005    | 2006    | 2007    | 2008    | 2009    | 2010    |
|-------------------------------------------|----------------------------------------------------------|---------|-----------|---------|---------|---------|---------|---------|---------|
| The Roe Foundation                        | Manhattan Institute for Policy Research                  | .       | .         | .       | 10,000  | 15,000  | .       | .       | .       |
| The Roe Foundation                        | Media Research Center                                    | 1,000   | .         | 2,500   | .       | .       | .       | .       | .       |
| The Roe Foundation                        | Mercatus Center                                          | 6,000   | .         | .       | .       | .       | .       | .       | .       |
| The Roe Foundation                        | Mountain States Legal Foundation                         | 1,000   | .         | 1,000   | .       | .       | .       | .       | .       |
| The Roe Foundation                        | National Center for Policy Analysis                      | 1,000   | .         | .       | .       | .       | .       | .       | .       |
| The Roe Foundation                        | National Center for Public Policy Research               | .       | .         | 1,000   | .       | .       | .       | .       | .       |
| The Roe Foundation                        | National Taxpayers Union Foundation                      | .       | .         | 1,000   | .       | .       | .       | .       | .       |
| The Roe Foundation                        | Oklahoma Council of Public Affairs                       | .       | .         | 25,000  | 25,000  | 30,000  | .       | 30,000  | 25,000  |
| The Roe Foundation                        | Pacific Research Institute for Public Policy             | .       | .         | .       | 40,000  | .       | .       | 25,000  | 20,000  |
| The Roe Foundation                        | Reason Foundation                                        | 20,000  | 40,000    | 20,000  | 20,000  | 20,000  | .       | 20,000  | .       |
| The Roe Foundation                        | State Policy Network                                     | 80,000  | 65,000    | 65,000  | 90,000  | 65,000  | 65,000  | 65,000  | 70,000  |
| The Roe Foundation                        | Texas Public Policy Foundation                           | 10,000  | .         | 20,000  | .       | 30,000  | 30,000  | 30,000  | 25,000  |
| The Roe Foundation                        | Thomas Jefferson Institute for Public Policy             | .       | .         | 10,000  | 10,000  | .       | .       | 20,000  | 15,000  |
| The Roe Foundation                        | Washington Policy Center                                 | .       | .         | 15,000  | .       | 20,000  | .       | 25,000  | 25,000  |
| The Samuel Roberts Noble Foundation, Inc. | Capital Research Center                                  | .       | .         | .       | 60,000  | .       | .       | .       | .       |
| The Samuel Roberts Noble Foundation, Inc. | Heritage Foundation                                      | .       | 5,000,000 | .       | .       | .       | .       | .       | .       |
| The Samuel Roberts Noble Foundation, Inc. | National Center for Policy Analysis                      | .       | .         | .       | .       | .       | 30,000  | .       | .       |
| The Samuel Roberts Noble Foundation, Inc. | Oklahoma Council of Public Affairs                       | .       | 250,000   | 600,000 | .       | .       | 400,000 | .       | .       |
| The Samuel Roberts Noble Foundation, Inc. | Southeastern Legal Foundation                            | .       | 75,000    | 50,000  | 225,000 | .       | .       | .       | .       |
| The San Francisco Foundation              | American Enterprise Institute for Public Policy Research | .       | 110,000   | 1,500   | 2,000   | 2,500   | 5,000   | .       | .       |
| The San Francisco Foundation              | Americans for Prosperity Foundation                      | .       | .         | .       | 25,000  | .       | .       | .       | .       |
| The San Francisco Foundation              | Cato Institute                                           | 195,000 | 30,500    | 182,000 | 155,000 | 160,000 | 40,000  | 115,000 | 290,000 |
| The San Francisco Foundation              | Consumer Alert                                           | .       | 2,000     | .       | .       | .       | .       | .       | .       |
| The San Francisco Foundation              | Hoover Institution on War, Revolution and Peace          | .       | 8,000     | 11,500  | 8,000   | .       | 14,200  | 26,000  | 10,000  |
| The San Francisco Foundation              | Independent Institute                                    | 10,000  | .         | 10,000  | .       | 11,000  | .       | 3,000   | .       |
| The San Francisco Foundation              | Manhattan Institute for Policy Research                  | 10,000  | .         | .       | .       | 10,000  | .       | .       | .       |
| The San Francisco Foundation              | National Taxpayers Union Foundation                      | .       | 1,000     | .       | 1,000   | .       | .       | .       | .       |
| The San Francisco Foundation              | Pacific Research Institute for Public Policy             | 24,500  | 30,000    | 60,000  | 25,000  | 10,000  | .       | 15,000  | .       |
| The San Francisco Foundation              | Reason Foundation                                        | .       | .         | .       | .       | .       | 30,000  | .       | .       |
| The Starr Foundation                      | Heritage Foundation                                      | .       | .         | .       | .       | .       | .       | .       | .       |
| The Starr Foundation                      | Hudson Institute                                         | .       | .         | .       | .       | .       | .       | .       | 10,000  |
| The Starr Foundation                      | Manhattan Institute for Policy Research                  | .       | 500,000   | .       | 550,000 | 25,000  | 275,000 | 100,000 | 75,000  |
| The T. Boone Pickens Foundation           | American Enterprise Institute for Public Policy Research | .       | .         | .       | .       | .       | 800,000 | .       | .       |

| Foundation                                   | Recipient                                                | 2003    | 2004    | 2005    | 2006    | 2007      | 2008    | 2009    | 2010    |
|----------------------------------------------|----------------------------------------------------------|---------|---------|---------|---------|-----------|---------|---------|---------|
| The T. Boone Pickens Foundation              | FreedomWorks Foundation                                  | .       | .       | .       | .       | 1,000,000 | .       | .       | .       |
| The Thomas and Stacey Siebel Foundation      | American Enterprise Institute for Public Policy Research | .       | .       | .       | .       | .         | .       | 100,000 | .       |
| The Thomas and Stacey Siebel Foundation      | Hoover Institution on War, Revolution and Peace          | .       | .       | .       | .       | 100,000   | .       | 110,000 | 110,000 |
| The TWS Foundation                           | American Enterprise Institute for Public Policy Research | .       | .       | .       | 115,000 | .         | .       | .       | .       |
| The TWS Foundation                           | Atlas Economic Research Foundation                       | .       | .       | .       | .       | 10,000    | .       | .       | .       |
| The TWS Foundation                           | Cato Institute                                           | 20,000  | 50,000  | 50,000  | 74,600  | 50,000    | 10,000  | .       | .       |
| The TWS Foundation                           | Competitive Enterprise Institute                         | .       | .       | .       | 1,000   | 10,000    | 10,000  | .       | .       |
| The TWS Foundation                           | Manhattan Institute for Policy Research                  | 98,200  | .       | 100,000 | 250,000 | 300,000   | 297,950 | .       | .       |
| The TWS Foundation                           | Media Research Center                                    | 10,000  | .       | 10,000  | 10,000  | 10,000    | .       | .       | .       |
| The TWS Foundation                           | Mercatus Center                                          | .       | .       | .       | 1,000   | .         | .       | .       | .       |
| The TWS Foundation                           | National Center for Policy Analysis                      | 200,000 | .       | 50,000  | .       | .         | .       | .       | .       |
| The UPS Foundation                           | American Enterprise Institute for Public Policy Research | 60,000  | 50,000  | 75,000  | 50,000  | .         | .       | .       | .       |
| The UPS Foundation                           | American Legislative Exchange Council                    | 40,000  | 40,000  | 40,000  | 40,000  | 40,000    | 40,000  | 42,500  | 30,000  |
| The UPS Foundation                           | Heritage Foundation                                      | .       | .       | 25,000  | 25,000  | 25,000    | .       | .       | 25,000  |
| The UPS Foundation                           | Hudson Institute                                         | 25,000  | .       | .       | .       | .         | .       | .       | .       |
| The Weismann Foundation                      | Manhattan Institute for Policy Research                  | .       | .       | .       | .       | 200,339   | .       | 80,000  | .       |
| The William and Flora Hewlett Foundation     | American Enterprise Institute for Public Policy Research | 50,000  | .       | .       | 180,000 | .         | .       | .       | .       |
| The William and Flora Hewlett Foundation     | Cato Institute                                           | .       | .       | .       | 201,000 | .         | .       | .       | .       |
| The William and Flora Hewlett Foundation     | Heritage Foundation                                      | .       | .       | .       | .       | 450,000   | .       | .       | .       |
| The William and Inez Mabie Family Foundation | American Enterprise Institute for Public Policy Research | 500,000 | 500,000 | .       | .       | .         | .       | .       | .       |
| The William H. Donner Foundation             | American Enterprise Institute for Public Policy Research | .       | .       | .       | .       | .         | 54,500  | 25,000  | .       |
| The William H. Donner Foundation             | Atlas Economic Research Foundation                       | 30,000  | 55,000  | 85,000  | 94,869  | 100,000   | 75,000  | 75,000  | 50,000  |
| The William H. Donner Foundation             | Capital Research Center                                  | 20,000  | 35,000  | 30,000  | 20,000  | 42,500    | 25,000  | 20,000  | 20,000  |
| The William H. Donner Foundation             | Cato Institute                                           | 20,000  | 20,000  | 20,000  | 20,000  | 25,000    | 20,000  | 20,000  | 20,000  |
| The William H. Donner Foundation             | Competitive Enterprise Institute                         | .       | .       | .       | .       | .         | .       | .       | 10,000  |
| The William H. Donner Foundation             | Environmental Literacy Council                           | 15,000  | .       | .       | .       | .         | .       | .       | .       |
| The William H. Donner Foundation             | Heritage Foundation                                      | 25,000  | 25,000  | 25,000  | 25,000  | 45,000    | 25,000  | 25,000  | 57,000  |
| The William H. Donner Foundation             | Hoover Institution on War, Revolution and Peace          | 50,000  | 50,000  | 70,902  | 60,000  | 75,000    | .       | .       | .       |
| The William H. Donner Foundation             | Hudson Institute                                         | 50,000  | 75,000  | 25,000  | 50,000  | 115,000   | 75,000  | 40,000  | 50,000  |
| The William H. Donner Foundation             | Independence Institute                                   | 39,905  | 58,000  | 25,000  | 20,000  | 25,000    | 30,000  | 25,000  | 20,000  |
| The William H. Donner Foundation             | Independent Womens Forum                                 | 10,000  | .       | 25,000  | 25,000  | 28,157    | 15,000  | 40,000  | .       |
| The William H. Donner Foundation             | Landmark Legal Foundation                                | .       | 50,000  | 45,000  | .       | .         | .       | .       | .       |
| The William H. Donner Foundation             | Manhattan Institute for Policy Research                  | 50,000  | 90,000  | 48,000  | 65,000  | 40,000    | 30,000  | 35,000  | 32,500  |

| Foundation                            | Recipient                                                | 2003    | 2004    | 2005    | 2006    | 2007      | 2008      | 2009    | 2010    |
|---------------------------------------|----------------------------------------------------------|---------|---------|---------|---------|-----------|-----------|---------|---------|
| The William H. Donner Foundation      | Media Research Center                                    | 15,000  | 57,246  | 10,000  | 20,000  | 20,000    | 10,000    | 2,500   | 10,000  |
| The William H. Donner Foundation      | National Taxpayers Union Foundation                      | 10,000  | 10,000  | .       | 10,000  | .         | .         | .       | .       |
| The William H. Donner Foundation      | Pacific Research Institute for Public Policy             | 107,000 | 80,000  | 20,000  | 20,000  | 40,000    | 25,000    | 20,000  | 20,000  |
| The William H. Donner Foundation      | Reason Foundation                                        | .       | .       | .       | 10,000  | .         | 10,000    | .       | .       |
| The William H. Donner Foundation      | State Policy Network                                     | .       | .       | .       | .       | 15,000    | 25,000    | .       | .       |
| The William H. Donner Foundation      | Texas Public Policy Foundation                           | .       | .       | .       | .       | .         | .         | 10,000  | .       |
| The Woods Charitable Foundation       | American Enterprise Institute for Public Policy Research | .       | .       | 250,000 | 250,000 | .         | 300,000   | 350,000 | .       |
| Timken Foundation of Canton           | Hoover Institution on War, Revolution and Peace          | .       | .       | .       | .       | .         | 50,000    | 200,000 | 150,000 |
| Tully and Elise Friedman Fund         | American Enterprise Institute for Public Policy Research | 112,000 | 214,000 | 255,000 | 250,000 | 350,000   | 600,000   | 600,000 | 650,000 |
| Tully and Elise Friedman Fund         | Americans for Prosperity Foundation                      | .       | .       | .       | 50,000  | .         | 50,000    | .       | .       |
| Vanguard Charitable Endowment Program | American Enterprise Institute for Public Policy Research | 1,500   | 75,000  | 133,000 | 627,000 | 1,126,500 | 1,025,500 | 35,500  | 140,500 |
| Vanguard Charitable Endowment Program | American Legislative Exchange Council                    | .       | .       | .       | .       | .         | .         | 60,000  | 12,000  |
| Vanguard Charitable Endowment Program | Americans for Prosperity Foundation                      | .       | .       | 5,000   | .       | 15,000    | 8,000     | 10,000  | 5,500   |
| Vanguard Charitable Endowment Program | Atlas Economic Research Foundation                       | 5,000   | 22,500  | 57,000  | 43,000  | 52,000    | 55,500    | 153,200 | 107,700 |
| Vanguard Charitable Endowment Program | Capital Research Center                                  | 1,000   | .       | 500     | 500     | 500       | 17,000    | 34,500  | 16,500  |
| Vanguard Charitable Endowment Program | Cato Institute                                           | 288,000 | 250,500 | 500,000 | 414,000 | 576,500   | 330,500   | 850,900 | 588,500 |
| Vanguard Charitable Endowment Program | Competitive Enterprise Institute                         | 42,000  | 19,000  | 29,500  | 47,000  | 94,000    | 102,000   | 99,500  | 80,300  |
| Vanguard Charitable Endowment Program | FreedomWorks Foundation                                  | .       | .       | .       | .       | 30,000    | 30,000    | 61,000  | 90,000  |
| Vanguard Charitable Endowment Program | Heartland Institute                                      | 1,000   | 500     | 2,500   | 3,000   | 11,000    | 19,500    | 25,000  | 27,500  |
| Vanguard Charitable Endowment Program | Heritage Foundation                                      | 60,000  | 85,000  | 176,000 | 189,850 | 421,750   | 274,000   | 361,500 | 285,500 |
| Vanguard Charitable Endowment Program | Independent Institute                                    | .       | 500     | 3,000   | 3,500   | 4,500     | .         | 6,500   | .       |
| Vanguard Charitable Endowment Program | Manhattan Institute for Policy Research                  | 2,000   | 45,640  | .       | 126,000 | 117,500   | 10,500    | 21,500  | 28,900  |
| Vanguard Charitable Endowment Program | Media Research Center                                    | 55,000  | 47,500  | 48,000  | 68,600  | 69,000    | .         | 59,500  | .       |
| Vanguard Charitable Endowment Program | Mercatus Center                                          | 1,000   | 3,500   | 25,000  | 25,500  | 10,800    | 35,500    | 65,500  | 35,500  |
| Vanguard Charitable Endowment Program | Mountain States Legal Foundation                         | .       | 2,500   | 5,000   | 1,000   | 2,000     | 11,000    | 7,000   | 10,300  |
| Vanguard Charitable Endowment Program | Pacific Research Institute for Public Policy             | 20,000  | 12,500  | 82,000  | 89,000  | 106,000   | 85,250    | 103,250 | 118,000 |
| Vanguard Charitable Endowment Program | Reason Foundation                                        | 24,000  | 24,000  | 121,180 | 16,500  | 298,000   | 21,500    | 329,500 | 329,500 |
| Vanguard Charitable Endowment Program | Science and Environmental Policy Project                 | .       | .       | .       | .       | .         | .         | 10,000  | .       |
| Vanguard Charitable Endowment Program | State Policy Network                                     | .       | .       | .       | .       | .         | .         | 20,000  | 11,000  |
| Walton Family Foundation, Inc.        | American Enterprise Institute for Public Policy Research | 80,000  | 27,900  | .       | .       | .         | .         | .       | .       |
| Walton Family Foundation, Inc.        | Capital Research Center                                  | .       | 1,000   | 1,000   | 1,000   | 1,000     | 1,000     | 1,000   | 1,000   |
| Walton Family Foundation, Inc.        | Cato Institute                                           | .       | 3,000   | 3,000   | 3,000   | 3,000     | 3,000     | 3,000   | 3,000   |
| Walton Family Foundation, Inc.        | Heartland Institute                                      | 110,000 | 90,000  | .       | 90,000  | .         | .         | .       | .       |

| Foundation                                   | Recipient                                                | 2003    | 2004    | 2005      | 2006    | 2007      | 2008    | 2009    | 2010    |
|----------------------------------------------|----------------------------------------------------------|---------|---------|-----------|---------|-----------|---------|---------|---------|
| Walton Family Foundation, Inc.               | Heritage Foundation                                      | .       | 5,000   | .         | .       | 5,000     | 5,000   | 5,000   | 5,000   |
| Walton Family Foundation, Inc.               | Hoover Institution on War, Revolution and Peace          | .       | .       | 1,355,627 | 927,338 | 1,540,242 | 10,000  | .       | .       |
| Walton Family Foundation, Inc.               | Hudson Institute                                         | 25,000  | 25,000  | .         | .       | .         | .       | .       | .       |
| Walton Family Foundation, Inc.               | Manhattan Institute for Policy Research                  | 75,000  | 95,000  | .         | .       | .         | .       | 150,525 | .       |
| Walton Family Foundation, Inc.               | Pacific Research Institute for Public Policy             | 35,000  | 35,000  | 35,000    | 35,000  | 35,000    | 55,000  | .       | .       |
| Walton Family Foundation, Inc.               | Reason Foundation                                        | .       | .       | .         | .       | .         | .       | .       | 40,000  |
| WellPoint Foundation, Inc.                   | American Enterprise Institute for Public Policy Research | .       | .       | .         | 250,000 | .         | .       | .       | 300,000 |
| WellPoint Foundation, Inc.                   | Cato Institute                                           | .       | .       | .         | .       | 50,000    | .       | .       | .       |
| WellPoint Foundation, Inc.                   | Pacific Research Institute for Public Policy             | .       | .       | .         | .       | .         | .       | .       | 98,000  |
| William E. Simon Foundation, Inc.            | American Enterprise Institute for Public Policy Research | .       | 50,000  | .         | 75,000  | 75,000    | .       | 100,000 | 75,000  |
| William E. Simon Foundation, Inc.            | Atlas Economic Research Foundation                       | .       | .       | .         | 5,000   | .         | .       | .       | .       |
| William E. Simon Foundation, Inc.            | Heritage Foundation                                      | .       | 50,000  | 50,000    | 50,000  | 75,000    | 75,000  | 175,000 | 100,000 |
| William E. Simon Foundation, Inc.            | Hoover Institution on War, Revolution and Peace          | 60,000  | 60,000  | 60,000    | .       | .         | 250,000 | .       | 250,000 |
| William E. Simon Foundation, Inc.            | Hudson Institute                                         | .       | .       | .         | .       | 25,000    | 20,000  | .       | .       |
| William E. Simon Foundation, Inc.            | Independent Institute                                    | 50,000  | .       | .         | .       | .         | .       | .       | .       |
| William E. Simon Foundation, Inc.            | Independent Womens Forum                                 | .       | .       | .         | .       | .         | 10,000  | .       | .       |
| William E. Simon Foundation, Inc.            | Manhattan Institute for Policy Research                  | 95,000  | 50,000  | 55,000    | 406,200 | 352,500   | 382,500 | 310,000 | 395,000 |
| William E. Simon Foundation, Inc.            | Pacific Research Institute for Public Policy             | 50,000  | 50,000  | 80,000    | 80,000  | 75,000    | 75,000  | 80,000  | 80,000  |
| William E. Simon Foundation, Inc.            | Reason Foundation                                        | .       | 40,000  | .         | 40,000  | .         | .       | .       | .       |
| William Howard Flowers, Jr. Foundation, Inc. | Heritage Foundation                                      | .       | .       | 10,000    | 10,000  | 10,000    | 10,000  | 10,000  | 20,000  |
| William Howard Flowers, Jr. Foundation, Inc. | Southeastern Legal Foundation                            | .       | 100,000 | 100,000   | 100,000 | 100,000   | 100,000 | .       | 100,000 |
| William K. Bowes, Jr. Foundation             | Cato Institute                                           | 100,000 | 100,500 | 200,000   | 200,000 | 100,000   | 200,000 | 200,000 | 225,000 |
| William K. Bowes, Jr. Foundation             | Hoover Institution on War, Revolution and Peace          | 200,000 | .       | .         | .       | .         | 200,000 | .       | .       |
| William K. Bowes, Jr. Foundation             | Independent Institute                                    | .       | 110,000 | 210,000   | 200,000 | 200,000   | 225,000 | 200,000 | .       |

**S-9 – Foundation Funding of U.S. National Climate Counter-movement Organizations – By Recipient**

| Recipient                                                         | Foundation                                        | 2003      | 2004    | 2005    | 2006   | 2007    | 2008    | 2009      | 2010    |
|-------------------------------------------------------------------|---------------------------------------------------|-----------|---------|---------|--------|---------|---------|-----------|---------|
| 60 Plus                                                           | American Petroleum Institute                      | .         | .       | .       | .      | .       | 143,000 | 35,000    | 25,000  |
| Advancement of Sound Science Center                               | ExxonMobil Foundation                             | 10,000    | 10,000  | .       | .      | .       | .       | .         | .       |
| American Conservative Union Foundation                            | American Petroleum Institute                      | .         | .       | .       | .      | .       | 33,500  | 25,000    | .       |
| American Conservative Union Foundation                            | Coors Affiliated Foundations                      | .         | .       | .       | .      | .       | .       | 10,000    | .       |
| American Conservative Union Foundation                            | Dodge Jones Foundation                            | .         | .       | .       | .      | .       | .       | .         | 5,000   |
| American Conservative Union Foundation                            | Donors Trust/Donors Capital Fund                  | .         | 3,250   | 1,000   | 1,500  | 1,500   | 8,000   | 3,000     | 2,000   |
| American Conservative Union Foundation                            | ExxonMobil Foundation                             | .         | .       | 50,000  | .      | .       | .       | .         | .       |
| American Conservative Union Foundation                            | Hilton Family Foundation                          | 1,000     | .       | .       | .      | .       | .       | .         | .       |
| American Conservative Union Foundation                            | John William Pope Foundation                      | 5,000     | 5,000   | 11,000  | 10,000 | 5,000   | .       | .         | .       |
| American Conservative Union Foundation                            | Koch Affiliated Foundations                       | .         | .       | 2,000   | .      | .       | .       | .         | .       |
| American Conservative Union Foundation                            | The Anschutz Foundation                           | .         | .       | .       | .      | .       | .       | 10,000    | .       |
| American Conservative Union Foundation                            | The Armstrong Foundation                          | .         | .       | .       | .      | 50,000  | 20,000  | 5,000     | 5,000   |
| American Conservative Union Foundation                            | The Capital Group Companies Charitable Foundation | .         | .       | .       | .      | .       | 2,500   | .         | .       |
| American Conservative Union Foundation                            | The Lynde and Harry Bradley Foundation, Inc.      | 25,000    | .       | 35,000  | 35,000 | 65,000  | 80,000  | 50,000    | 50,000  |
| American Council for Capital Formation                            | American Petroleum Institute                      | .         | .       | .       | .      | .       | 100,000 | 50,000    | 10,000  |
| American Council for Capital Formation                            | ExxonMobil Foundation                             | 145,000   | .       | .       | .      | .       | .       | .         | .       |
| American Council for Capital Formation                            | John William Pope Foundation                      | .         | .       | .       | 10,000 | .       | .       | .         | .       |
| American Council for Capital Formation                            | Koch Affiliated Foundations                       | .         | .       | 25,000  | 40,000 | 50,000  | 100,000 | .         | .       |
| American Council for Capital Formation                            | Searle Freedom Trust                              | .         | .       | .       | .      | .       | .       | 100,000   | .       |
| American Council for Capital Formation Center for Policy Research | ExxonMobil Foundation                             | .         | 255,000 | 360,000 | .      | .       | .       | .         | .       |
| American Council for Capital Formation Center for Policy Research | General Motors Foundation, Inc.                   | 25,000    | 60,000  | 45,000  | .      | 10,000  | 10,000  | .         | .       |
| American Council for Capital Formation Center for Policy Research | Greater Kansas City Community Foundation          | .         | .       | .       | .      | .       | .       | 100,000   | .       |
| American Council for Capital Formation Center for Policy Research | Koch Affiliated Foundations                       | .         | .       | .       | .      | .       | .       | 100,000   | 50,000  |
| American Council for Capital Formation Center for Policy Research | Searle Freedom Trust                              | .         | .       | .       | .      | .       | 60,000  | .         | 100,000 |
| American Council for Capital Formation Center for Policy Research | The Chrysler Foundation                           | .         | 10,000  | 10,000  | .      | .       | .       | .         | .       |
| American Enterprise Institute for Public Policy Research          | Aequus Institute                                  | .         | .       | .       | .      | .       | .       | 1,000     | .       |
| American Enterprise Institute for Public Policy Research          | American Petroleum Institute                      | .         | .       | .       | .      | .       | 35,000  | 25,000    | .       |
| American Enterprise Institute for Public Policy Research          | Bill & Melinda Gates Foundation                   | .         | .       | .       | .      | 500,000 | .       | 2,144,000 | .       |
| American Enterprise Institute for Public Policy Research          | Brady Education Foundation, Inc.                  | 5,000,000 | .       | .       | .      | .       | .       | .         | .       |
| American Enterprise Institute for Public Policy Research          | Carnegie Corporation of New York                  | 25,000    | .       | .       | 22,000 | .       | 20,000  | .         | .       |

| Recipient                                                | Foundation                                              | 2003      | 2004      | 2005      | 2006      | 2007      | 2008      | 2009      | 2010      |
|----------------------------------------------------------|---------------------------------------------------------|-----------|-----------|-----------|-----------|-----------|-----------|-----------|-----------|
| American Enterprise Institute for Public Policy Research | Charles and Ann Johnson Foundation                      | 1,000     | .         | 1,000     | .         | .         | .         | .         | .         |
| American Enterprise Institute for Public Policy Research | Coors Affiliated Foundations                            | 50,000    | 50,000    | .         | 60,000    | 75,000    | .         | 150,000   | 150,000   |
| American Enterprise Institute for Public Policy Research | Daniels Fund                                            | .         | 25,000    | 25,000    | .         | .         | .         | .         | .         |
| American Enterprise Institute for Public Policy Research | Dodge Jones Foundation                                  | 10,000    | .         | 30,000    | 100,000   | 10,000    | 10,000    | .         | 20,000    |
| American Enterprise Institute for Public Policy Research | Donors Trust/Donors Capital Fund                        | 1,651,000 | 1,508,500 | 1,501,000 | 2,029,500 | 2,267,030 | 2,292,267 | 2,706,750 | 2,492,877 |
| American Enterprise Institute for Public Policy Research | Douglas & Maria DeVos Foundation                        | .         | .         | 5,000     | .         | .         | .         | 500,000   | 500,000   |
| American Enterprise Institute for Public Policy Research | Dunn's Foundation for the Advancement of Right Thinking | 25,000    | 25,000    | .         | 65,000    | 32,000    | .         | .         | .         |
| American Enterprise Institute for Public Policy Research | Earhart Foundation                                      | 50,000    | 100,000   | 100,000   | 100,000   | 100,000   | 90,000    | 30,000    | .         |
| American Enterprise Institute for Public Policy Research | Eli Lilly and Company Foundation                        | 30,000    | 40,000    | 40,000    | 40,000    | 40,000    | 20,000    | 25,000    | 25,000    |
| American Enterprise Institute for Public Policy Research | Ewing Marion Kauffman Foundation                        | .         | 175,000   | .         | .         | 830,000   | .         | 25,000    | 80,400    |
| American Enterprise Institute for Public Policy Research | ExxonMobil Foundation                                   | 225,000   | 225,000   | 235,000   | .         | .         | .         | .         | .         |
| American Enterprise Institute for Public Policy Research | F. M. Kirby Foundation, Inc.                            | 15,000    | 18,000    | 18,000    | 18,000    | 25,000    | 30,000    | 30,000    | 35,000    |
| American Enterprise Institute for Public Policy Research | General Motors Foundation, Inc.                         | 100,000   | 100,000   | 50,000    | 25,000    | 25,000    | 25,000    | .         | .         |
| American Enterprise Institute for Public Policy Research | H. Smith Richardson Charitable Trust                    | 50,000    | .         | .         | 161,280   | .         | .         | .         | 150,000   |
| American Enterprise Institute for Public Policy Research | Henry R. Kravis Foundation, Inc.                        | .         | .         | .         | 100,000   | .         | 50,000    | 50,000    | .         |
| American Enterprise Institute for Public Policy Research | John S. and James L. Knight Foundation                  | .         | 55,000    | 800,000   | .         | .         | .         | .         | 98,500    |
| American Enterprise Institute for Public Policy Research | John Templeton Foundation                               | .         | .         | 123,500   | 19,800    | 20,000    | 20,000    | 205,000   | 610,000   |
| American Enterprise Institute for Public Policy Research | John William Pope Foundation                            | .         | .         | .         | .         | .         | 10,000    | 10,000    | 10,000    |
| American Enterprise Institute for Public Policy Research | Koch Affiliated Foundations                             | .         | 50,000    | .         | 100,000   | .         | .         | .         | .         |
| American Enterprise Institute for Public Policy Research | Koret Foundation                                        | 20,000    | 27,900    | 25,000    | .         | 25,000    | .         | .         | .         |
| American Enterprise Institute for Public Policy Research | Lakeside Foundation                                     | 15,000    | 15,000    | 15,000    | 15,000    | 15,000    | 15,000    | 15,000    | 15,000    |
| American Enterprise Institute for Public Policy Research | Lilly Endowment Inc.                                    | 100,000   | 100,000   | 100,000   | 100,000   | 100,000   | 100,000   | 100,000   | 100,000   |
| American Enterprise Institute for Public Policy Research | Lovett & Ruth Peters Foundation                         | .         | .         | .         | .         | .         | .         | .         | 40,000    |
| American Enterprise Institute for Public Policy Research | Malott Family Foundation                                | 40,000    | 20,000    | 20,000    | 20,000    | 250,000   | 290,000   | 20,000    | 270,000   |
| American Enterprise Institute for Public Policy Research | S.D. Bechtel, Jr. Foundation                            | .         | .         | .         | .         | .         | .         | 605,000   | .         |
| American Enterprise Institute for Public Policy Research | Scaife Affiliated Foundations                           | 400,000   | 525,000   | 525,000   | 575,000   | 200,000   | 575,000   | 500,000   | 500,000   |
| American Enterprise Institute for Public Policy Research | Searle Freedom Trust                                    | .         | .         | .         | 194,000   | 1,800,000 | 1,500,000 | 1,500,000 | 1,500,000 |
| American Enterprise Institute for Public Policy Research | Smith Richardson Foundation, Inc.                       | 886,667   | 233,333   | 675,000   | 426,280   | 1,328,250 | 732,000   | 985,000   | 450,000   |
| American Enterprise Institute for Public Policy Research | Stephen Bechtel Fund                                    | .         | .         | .         | .         | .         | 15,000    | .         | 650,000   |
| American Enterprise Institute for Public Policy Research | Taube Family Foundation                                 | .         | .         | .         | .         | .         | .         | .         | 2,500     |



| Recipient                                                | Foundation                                        | 2003      | 2004      | 2005      | 2006    | 2007    | 2008      | 2009      | 2010      |
|----------------------------------------------------------|---------------------------------------------------|-----------|-----------|-----------|---------|---------|-----------|-----------|-----------|
| American Enterprise Institute for Public Policy Research | The Achelis Foundation                            | .         | .         | .         | .       | .       | 75,000    | .         | .         |
| American Enterprise Institute for Public Policy Research | The Ambrose Monell Foundation                     | 100,000   | 100,000   | 100,000   | 100,000 | 100,000 | 100,000   | 100,000   | 100,000   |
| American Enterprise Institute for Public Policy Research | The Anschutz Foundation                           | .         | 5,000     | 10,000    | .       | 25,000  | 10,000    | 100,000   | .         |
| American Enterprise Institute for Public Policy Research | The Armstrong Foundation                          | .         | .         | .         | .       | .       | 10,000    | 10,000    | 10,000    |
| American Enterprise Institute for Public Policy Research | The Bodman Foundation                             | .         | .         | .         | 75,000  | .       | .         | .         | 50,000    |
| American Enterprise Institute for Public Policy Research | The Bristol-Myers Squibb Foundation, Inc.         | 100,000   | 100,000   | 100,000   | 100,000 | 100,000 | 175,000   | .         | .         |
| American Enterprise Institute for Public Policy Research | The Capital Group Companies Charitable Foundation | .         | .         | .         | .       | 6,000   | .         | .         | .         |
| American Enterprise Institute for Public Policy Research | The Carson Family Charitable Trust                | 20,000    | 100,000   | 100,000   | 100,000 | 100,000 | 100,000   | .         | .         |
| American Enterprise Institute for Public Policy Research | The Chisholm Foundation                           | 15,000    | .         | 25,000    | 50,000  | .       | .         | 10,000    | 15,000    |
| American Enterprise Institute for Public Policy Research | The Chrysler Foundation                           | .         | .         | 50,000    | 15,000  | 15,000  | .         | .         | .         |
| American Enterprise Institute for Public Policy Research | The Jean I. & Charles H. Brunie Foundation        | .         | 25,000    | .         | .       | .       | .         | .         | .         |
| American Enterprise Institute for Public Policy Research | The JM Foundation                                 | .         | .         | .         | .       | .       | .         | .         | 40,000    |
| American Enterprise Institute for Public Policy Research | The John D. and Catherine T. MacArthur Foundation | 50,000    | .         | .         | .       | .       | .         | .         | .         |
| American Enterprise Institute for Public Policy Research | The Kern Family Foundation, Inc.                  | .         | .         | .         | .       | .       | .         | 1,039,490 | 1,071,912 |
| American Enterprise Institute for Public Policy Research | The Kovner Foundation                             | 1,677,734 | 1,299,301 | 1,300,000 | 300,000 | 300,000 | 1,300,000 | 3,300,000 | 3,300,000 |
| American Enterprise Institute for Public Policy Research | The Lynde and Harry Bradley Foundation, Inc.      | 625,000   | 625,000   | 500,000   | 520,000 | 525,000 | 445,000   | 370,000   | 470,000   |
| American Enterprise Institute for Public Policy Research | The Marcus Foundation, Inc.                       | .         | .         | .         | .       | 10,000  | .         | 50,000    | .         |
| American Enterprise Institute for Public Policy Research | The MeadWestvaco Foundation                       | 100,000   | 125,000   | 125,000   | 100,000 | .       | 525,000   | 525,000   | 1,500,000 |
| American Enterprise Institute for Public Policy Research | The Paul Singer Family Foundation                 | .         | 10,000    | .         | .       | .       | .         | .         | .         |
| American Enterprise Institute for Public Policy Research | The Richard and Helen DeVos Foundation            | 7,500     | 5,000     | 10,000    | 10,000  | 15,000  | 15,000    | 115,000   | 150,000   |
| American Enterprise Institute for Public Policy Research | The Roberts Foundation                            | 150,000   | 200,000   | 150,000   | .       | 200,000 | 100,000   | 50,000    | 500,000   |
| American Enterprise Institute for Public Policy Research | The San Francisco Foundation                      | .         | 110,000   | 1,500     | 2,000   | 2,500   | 5,000     | .         | .         |
| American Enterprise Institute for Public Policy Research | The T. Boone Pickens Foundation                   | .         | .         | .         | .       | .       | 800,000   | .         | .         |
| American Enterprise Institute for Public Policy Research | The Thomas and Stacey Siebel Foundation           | .         | .         | .         | .       | .       | .         | 100,000   | .         |
| American Enterprise Institute for Public Policy Research | The TWS Foundation                                | .         | .         | .         | 115,000 | .       | .         | .         | .         |
| American Enterprise Institute for Public Policy Research | The UPS Foundation                                | 60,000    | 50,000    | 75,000    | 50,000  | .       | .         | .         | .         |
| American Enterprise Institute for Public Policy Research | The William and Flora Hewlett Foundation          | 50,000    | .         | .         | 180,000 | .       | .         | .         | .         |
| American Enterprise Institute for Public Policy Research | The William and Inez Mable Family Foundation      | 500,000   | 500,000   | .         | .       | .       | .         | .         | .         |
| American Enterprise Institute for Public Policy Research | The William H. Donner Foundation                  | .         | .         | .         | .       | .       | 54,500    | 25,000    | .         |
| American Enterprise Institute for Public Policy Research | The Woods Charitable Foundation                   | .         | .         | 250,000   | 250,000 | .       | 300,000   | 350,000   | .         |

| Recipient                                                | Foundation                                   | 2003    | 2004    | 2005    | 2006    | 2007      | 2008      | 2009    | 2010    |
|----------------------------------------------------------|----------------------------------------------|---------|---------|---------|---------|-----------|-----------|---------|---------|
| American Enterprise Institute for Public Policy Research | Tully and Elise Friedman Fund                | 112,000 | 214,000 | 255,000 | 250,000 | 350,000   | 600,000   | 600,000 | 650,000 |
| American Enterprise Institute for Public Policy Research | Vanguard Charitable Endowment Program        | 1,500   | 75,000  | 133,000 | 627,000 | 1,126,500 | 1,025,500 | 35,500  | 140,500 |
| American Enterprise Institute for Public Policy Research | Walton Family Foundation, Inc.               | 80,000  | 27,900  | .       | .       | .         | .         | .       | .       |
| American Enterprise Institute for Public Policy Research | WellPoint Foundation, Inc.                   | .       | .       | .       | 250,000 | .         | .         | .       | 300,000 |
| American Enterprise Institute for Public Policy Research | William E. Simon Foundation, Inc.            | .       | 50,000  | .       | 75,000  | 75,000    | .         | 100,000 | 75,000  |
| American Friends of the Institute of Economic Affairs    | Aequus Institute                             | .       | .       | .       | .       | .         | .         | 1,000   | .       |
| American Friends of the Institute of Economic Affairs    | Chase Foundation of Virginia                 | 14,000  | .       | 15,000  | .       | 10,000    | 10,000    | 10,000  | 10,000  |
| American Friends of the Institute of Economic Affairs    | Donors Trust/Donors Capital Fund             | .       | 84,150  | .       | 40,500  | .         | 40,000    | .       | .       |
| American Friends of the Institute of Economic Affairs    | ExxonMobil Foundation                        | .       | 50,000  | .       | .       | .         | .         | .       | .       |
| American Friends of the Institute of Economic Affairs    | John Templeton Foundation                    | .       | .       | .       | 400     | .         | .         | .       | .       |
| American Friends of the Institute of Economic Affairs    | Lovett & Ruth Peters Foundation              | .       | .       | .       | .       | 12,000    | 22,000    | .       | .       |
| American Friends of the Institute of Economic Affairs    | Rose-Marie and Jack R. Anderson Foundation   | .       | .       | .       | .       | 10,000    | .         | .       | .       |
| American Legislative Exchange Council                    | American Petroleum Institute                 | .       | .       | .       | .       | .         | 38,000    | 40,000  | 10,000  |
| American Legislative Exchange Council                    | Assurant Health Foundation                   | 25,000  | .       | .       | .       | .         | .         | .       | .       |
| American Legislative Exchange Council                    | Coors Affiliated Foundations                 | 50,000  | .       | .       | 50,000  | .         | .         | 50,000  | 50,000  |
| American Legislative Exchange Council                    | Daniels Fund                                 | 10,000  | .       | .       | .       | .         | .         | .       | .       |
| American Legislative Exchange Council                    | Donors Trust/Donors Capital Fund             | .       | .       | .       | .       | .         | .         | 8,000   | 25,000  |
| American Legislative Exchange Council                    | ExxonMobil Foundation                        | 290,000 | 167,000 | 151,500 | 30,000  | 31,000    | .         | .       | .       |
| American Legislative Exchange Council                    | General Motors Foundation, Inc.              | 25,000  | 95,000  | 25,000  | .       | .         | .         | .       | .       |
| American Legislative Exchange Council                    | Jaquelin Hume Foundation                     | 25,000  | 25,000  | .       | .       | .         | 25,000    | 45,000  | 50,000  |
| American Legislative Exchange Council                    | Koch Affiliated Foundations                  | .       | .       | .       | .       | 75,000    | .         | 200,858 | 100,000 |
| American Legislative Exchange Council                    | Lumina Foundation for Education, Inc.        | .       | .       | .       | .       | .         | 300,000   | .       | 295,000 |
| American Legislative Exchange Council                    | Scaife Affiliated Foundations                | 35,000  | 35,000  | 35,000  | 45,000  | 50,000    | 50,000    | 25,000  | .       |
| American Legislative Exchange Council                    | Searle Freedom Trust                         | 50,000  | 50,000  | .       | 100,000 | .         | 100,000   | 120,000 | 125,000 |
| American Legislative Exchange Council                    | The Armstrong Foundation                     | 2,500   | .       | .       | 2,500   | 2,500     | .         | 2,500   | 2,500   |
| American Legislative Exchange Council                    | The JM Foundation                            | .       | .       | .       | .       | .         | .         | 25,000  | .       |
| American Legislative Exchange Council                    | The Lynde and Harry Bradley Foundation, Inc. | .       | .       | .       | .       | .         | .         | 50,000  | 95,000  |
| American Legislative Exchange Council                    | The Roe Foundation                           | 2,500   | .       | 2,500   | .       | .         | .         | .       | .       |
| American Legislative Exchange Council                    | The UPS Foundation                           | 40,000  | 40,000  | 40,000  | 40,000  | 40,000    | 40,000    | 42,500  | 30,000  |
| American Legislative Exchange Council                    | Vanguard Charitable Endowment Program        | .       | .       | .       | .       | .         | .         | 60,000  | 12,000  |
| Americans for Prosperity Foundation                      | American Petroleum Institute                 | .       | .       | .       | .       | .         | 30,000    | 43,500  | 25,500  |
| Americans for Prosperity Foundation                      | Barney Family Foundation                     | .       | .       | .       | .       | .         | .         | .       | 100,000 |

| Recipient                                        | Foundation                                                   | 2003    | 2004    | 2005      | 2006      | 2007      | 2008      | 2009      | 2010      |
|--------------------------------------------------|--------------------------------------------------------------|---------|---------|-----------|-----------|-----------|-----------|-----------|-----------|
| Americans for Prosperity Foundation              | Chase Foundation of Virginia                                 | .       | .       | .         | .         | .         | .         | .         | 25,000    |
| Americans for Prosperity Foundation              | Coors Affiliated Foundations                                 | .       | .       | .         | .         | .         | .         | 50,000    | .         |
| Americans for Prosperity Foundation              | Donors Trust/Donors Capital Fund                             | .       | .       | 225,250   | 203,800   | 10,500    | 582,000   | 2,622,750 | 7,658,911 |
| Americans for Prosperity Foundation              | E. A. Morris Charitable Foundation                           | .       | 25,000  | 12,500    | .         | 5,000     | 5,000     | 2,500     | 2,500     |
| Americans for Prosperity Foundation              | Ed Uihlein Family Foundation                                 | .       | .       | .         | .         | .         | .         | .         | 25,000    |
| Americans for Prosperity Foundation              | F. M. Kirby Foundation, Inc.                                 | 25,000  | .       | .         | .         | .         | .         | .         | .         |
| Americans for Prosperity Foundation              | J. P. Humphreys Foundation                                   | .       | .       | .         | 50,000    | 50,000    | .         | .         | .         |
| Americans for Prosperity Foundation              | Jaquelin Hume Foundation                                     | .       | .       | .         | .         | .         | 25,000    | .         | .         |
| Americans for Prosperity Foundation              | John Dawson Foundation                                       | .       | .       | .         | .         | .         | .         | 250,000   | .         |
| Americans for Prosperity Foundation              | John Templeton Foundation                                    | .       | .       | .         | .         | 25,000    | .         | .         | .         |
| Americans for Prosperity Foundation              | John William Pope Foundation                                 | 150,000 | 150,000 | 212,500   | 275,000   | 170,000   | 300,000   | 500,000   | 275,000   |
| Americans for Prosperity Foundation              | Koch Affiliated Foundations                                  | .       | .       | 1,000,000 | 1,151,500 | 1,025,000 | 2,000,000 | 434,281   | 150,000   |
| Americans for Prosperity Foundation              | Lovett & Ruth Peters Foundation                              | .       | .       | .         | .         | 50,000    | 50,000    | .         | .         |
| Americans for Prosperity Foundation              | Scaife Affiliated Foundations                                | 175,000 | .       | .         | .         | .         | .         | .         | .         |
| Americans for Prosperity Foundation              | Searle Freedom Trust                                         | .       | .       | .         | 25,000    | 50,000    | 50,000    | 96,000    | 100,000   |
| Americans for Prosperity Foundation              | Stephen Bechtel Fund                                         | .       | .       | .         | .         | .         | 25,000    | 200,000   | .         |
| Americans for Prosperity Foundation              | Susquehanna Foundation                                       | .       | .       | 1,000     | 5,000     | .         | 5,000     | .         | .         |
| Americans for Prosperity Foundation              | The Anschutz Foundation                                      | 7,500   | 7,500   | 5,000     | .         | 15,000    | 15,000    | .         | .         |
| Americans for Prosperity Foundation              | The Armstrong Foundation                                     | .       | .       | .         | 5,000     | 20,000    | 10,000    | .         | 10,000    |
| Americans for Prosperity Foundation              | The Challenge Foundation                                     | .       | .       | .         | .         | .         | 250,000   | 67,600    | .         |
| Americans for Prosperity Foundation              | The Community Foundation Serving Richmond & Central Virginia | .       | .       | .         | .         | 100,000   | .         | 350,000   | .         |
| Americans for Prosperity Foundation              | The E. L. Craig Foundation                                   | .       | .       | .         | .         | .         | 50,000    | 50,000    | 100,000   |
| Americans for Prosperity Foundation              | The Gordon and Mary Cain Foundation                          | 20,000  | .       | .         | .         | .         | .         | .         | .         |
| Americans for Prosperity Foundation              | The JM Foundation                                            | .       | .       | 25,000    | .         | .         | 10,000    | .         | .         |
| Americans for Prosperity Foundation              | The Kern Family Foundation, Inc.                             | .       | .       | .         | .         | .         | 30,000    | .         | .         |
| Americans for Prosperity Foundation              | The Lynde and Harry Bradley Foundation, Inc.                 | .       | 25,000  | 100,000   | 25,000    | 25,000    | 25,000    | 20,000    | 500,000   |
| Americans for Prosperity Foundation              | The Marcus Foundation, Inc.                                  | .       | .       | .         | .         | .         | .         | .         | 1,000     |
| Americans for Prosperity Foundation              | The Rodney Fund                                              | .       | .       | .         | .         | .         | 4,000     | .         | .         |
| Americans for Prosperity Foundation              | The San Francisco Foundation                                 | .       | .       | .         | 25,000    | .         | .         | .         | .         |
| Americans for Prosperity Foundation              | Tully and Elise Friedman Fund                                | .       | .       | .         | 50,000    | .         | 50,000    | .         | .         |
| Americans for Prosperity Foundation              | Vanguard Charitable Endowment Program                        | .       | .       | 5,000     | .         | 15,000    | 8,000     | 10,000    | 5,500     |
| Annapolis Center for Science-Based Public Policy | American Petroleum Institute                                 | .       | .       | .         | .         | .         | .         | 40,000    | .         |
| Annapolis Center for Science-Based Public Policy | Eli Lilly and Company Foundation                             | .       | .       | 10,000    | 8,000     | .         | .         | .         | .         |

| Recipient                                        | Foundation                                              | 2003      | 2004      | 2005    | 2006      | 2007    | 2008    | 2009    | 2010      |
|--------------------------------------------------|---------------------------------------------------------|-----------|-----------|---------|-----------|---------|---------|---------|-----------|
| Annapolis Center for Science-Based Public Policy | ExxonMobil Foundation                                   | 50,000    | 75,000    | 80,000  | 75,000    | .       | .       | .       | .         |
| Annapolis Center for Science-Based Public Policy | General Motors Foundation, Inc.                         | 25,000    | 20,000    | 25,000  | 20,000    | 20,000  | 20,000  | .       | .         |
| Annapolis Center for Science-Based Public Policy | The Chrysler Foundation                                 | .         | .         | 10,000  | .         | .       | .       | .       | .         |
| Atlas Economic Research Foundation               | Aequus Institute                                        | .         | .         | .       | 5,000     | 5,000   | .       | 1,000   | 1,000     |
| Atlas Economic Research Foundation               | Charles and Ann Johnson Foundation                      | .         | .         | 5,000   | .         | .       | 15,000  | 10,000  | 10,000    |
| Atlas Economic Research Foundation               | Chase Foundation of Virginia                            | 34,000    | .         | 35,000  | 35,000    | 35,000  | 35,000  | .       | 37,000    |
| Atlas Economic Research Foundation               | Claws Foundation                                        | .         | .         | .       | .         | .       | .       | .       | 75,000    |
| Atlas Economic Research Foundation               | Donors Trust/Donors Capital Fund                        | 1,000     | 13,000    | 4,000   | 175,750   | 44,500  | 242,100 | 113,500 | 42,750    |
| Atlas Economic Research Foundation               | Dunn's Foundation for the Advancement of Right Thinking | .         | .         | .       | .         | .       | .       | .       | 30,000    |
| Atlas Economic Research Foundation               | Earhart Foundation                                      | 317,012   | 458,885   | 831,655 | 221,500   | 296,377 | 266,100 | 137,321 | 82,964    |
| Atlas Economic Research Foundation               | Ed Foundation                                           | .         | .         | .       | 50,000    | .       | .       | .       | .         |
| Atlas Economic Research Foundation               | Eli Lilly and Company Foundation                        | .         | .         | .       | 15,000    | .       | .       | .       | .         |
| Atlas Economic Research Foundation               | ExxonMobil Foundation                                   | 190,000   | 75,000    | 100,000 | 100,000   | .       | .       | .       | .         |
| Atlas Economic Research Foundation               | H. Smith Richardson Charitable Trust                    | .         | .         | .       | .         | 250,000 | .       | .       | .         |
| Atlas Economic Research Foundation               | J. P. Humphreys Foundation                              | 15,000    | 10,000    | 15,000  | 10,000    | 10,000  | 15,000  | .       | 65,000    |
| Atlas Economic Research Foundation               | John Templeton Foundation                               | 2,750,000 | 2,204,000 | 5,000   | 1,353,715 | 310,000 | 323,000 | 843,000 | 2,060,500 |
| Atlas Economic Research Foundation               | John William Pope Foundation                            | 100,000   | 100,000   | 100,000 | 125,000   | 100,000 | 75,000  | 75,000  | 50,000    |
| Atlas Economic Research Foundation               | K. C. Ames Foundation                                   | .         | 5,000     | .       | .         | .       | .       | .       | .         |
| Atlas Economic Research Foundation               | Koch Affiliated Foundations                             | .         | .         | .       | .         | 25,000  | 35,000  | 38,800  | .         |
| Atlas Economic Research Foundation               | Lilly Endowment Inc.                                    | 500,000   | 500,000   | 500,000 | 500,000   | 500,000 | 500,000 | 500,000 | 500,000   |
| Atlas Economic Research Foundation               | Lovett & Ruth Peters Foundation                         | .         | .         | .       | .         | 10,000  | .       | .       | 20,000    |
| Atlas Economic Research Foundation               | Pierre F. and Enid Goodrich Foundation                  | 20,000    | .         | 20,000  | 20,000    | 20,000  | 20,000  | .       | 15,000    |
| Atlas Economic Research Foundation               | Scaife Affiliated Foundations                           | 200,000   | 250,000   | 250,000 | 270,000   | 200,000 | 270,000 | 200,000 | 150,000   |
| Atlas Economic Research Foundation               | Searle Freedom Trust                                    | .         | .         | .       | .         | 70,000  | .       | .       | .         |
| Atlas Economic Research Foundation               | Smith Richardson Foundation, Inc.                       | .         | .         | .       | 239,830   | 264,000 | .       | 3,000   | .         |
| Atlas Economic Research Foundation               | Susquehanna Foundation                                  | .         | .         | 11,000  | .         | .       | .       | 40,000  | 25,000    |
| Atlas Economic Research Foundation               | The Achelis Foundation                                  | .         | .         | 25,000  | .         | .       | .       | .       | .         |
| Atlas Economic Research Foundation               | The Bodman Foundation                                   | .         | .         | 100,000 | .         | 125,000 | .       | .       | 50,000    |
| Atlas Economic Research Foundation               | The Challenge Foundation                                | .         | .         | .       | .         | .       | 10,000  | .       | .         |
| Atlas Economic Research Foundation               | The J. M. Kaplan Fund, Inc.                             | 135,000   | 125,000   | 125,000 | 125,000   | 150,000 | 200,000 | 180,000 | .         |
| Atlas Economic Research Foundation               | The Jeld-Wen Foundation                                 | 5,000     | 10,000    | 10,000  | .         | .       | .       | .       | .         |
| Atlas Economic Research Foundation               | The JM Foundation                                       | .         | 35,000    | .       | 35,000    | .       | .       | .       | 30,000    |
| Atlas Economic Research Foundation               | The Lynde and Harry Bradley Foundation, Inc.            | .         | .         | 20,000  | 25,000    | 25,000  | 5,000   | 5,000   | 5,000     |

| Recipient                          | Foundation                                     | 2003    | 2004    | 2005    | 2006    | 2007    | 2008    | 2009    | 2010    |
|------------------------------------|------------------------------------------------|---------|---------|---------|---------|---------|---------|---------|---------|
| Atlas Economic Research Foundation | The Richard Seth Staley Educational Foundation | 3,415   | .       | .       | .       | .       | .       | .       | 100     |
| Atlas Economic Research Foundation | The Roe Foundation                             | 25,000  | 20,000  | 20,000  | 25,000  | 25,000  | .       | 30,000  | 30,000  |
| Atlas Economic Research Foundation | The TWS Foundation                             | .       | .       | .       | .       | 10,000  | .       | .       | .       |
| Atlas Economic Research Foundation | The William H. Donner Foundation               | 30,000  | 55,000  | 85,000  | 94,869  | 100,000 | 75,000  | 75,000  | 50,000  |
| Atlas Economic Research Foundation | Vanguard Charitable Endowment Program          | 5,000   | 22,500  | 57,000  | 43,000  | 52,000  | 55,500  | 153,200 | 107,700 |
| Atlas Economic Research Foundation | William E. Simon Foundation, Inc.              | .       | .       | .       | 5,000   | .       | .       | .       | .       |
| Capital Research Center            | Aequus Institute                               | 5,000   | 3,000   | 3,000   | 3,000   | 5,000   | 3,000   | .       | .       |
| Capital Research Center            | Barbara and Barre Seid Foundation              | 1,000   | .       | .       | .       | .       | .       | .       | .       |
| Capital Research Center            | Charles and Ann Johnson Foundation             | .       | .       | .       | .       | .       | .       | .       | 5,000   |
| Capital Research Center            | Chase Foundation of Virginia                   | 6,000   | 6,100   | 6,000   | 6,000   | 5,000   | 4,000   | 4,000   | 6,000   |
| Capital Research Center            | Dodge Jones Foundation                         | 25,000  | .       | 10,000  | 10,000  | 10,000  | .       | .       | .       |
| Capital Research Center            | Donors Trust/Donors Capital Fund               | 1,000   | 7,500   | 8,000   | 14,500  | 6,500   | 9,500   | 18,500  | 15,000  |
| Capital Research Center            | Dorothy D. and Joseph A. Moller Foundation     | 5,000   | .       | 7,500   | 7,500   | .       | .       | .       | .       |
| Capital Research Center            | Earhart Foundation                             | 10,000  | 25,000  | 12,500  | .       | .       | .       | .       | .       |
| Capital Research Center            | ExxonMobil Foundation                          | 25,000  | 25,000  | 50,000  | .       | .       | .       | .       | .       |
| Capital Research Center            | F. M. Kirby Foundation, Inc.                   | 7,500   | 10,000  | 10,000  | 10,000  | 12,500  | 12,500  | .       | .       |
| Capital Research Center            | J. P. Humphreys Foundation                     | 10,000  | 10,000  | .       | 12,500  | .       | 5,000   | 5,000   | 5,000   |
| Capital Research Center            | Jaquelin Hume Foundation                       | 5,000   | 5,000   | .       | .       | .       | .       | .       | .       |
| Capital Research Center            | John William Pope Foundation                   | 10,000  | 10,000  | 15,000  | 10,000  | 10,000  | 10,000  | 10,000  | .       |
| Capital Research Center            | Koch Affiliated Foundations                    | 100,000 | 100,000 | 50,000  | 25,000  | 25,000  | 10,000  | .       | 20,000  |
| Capital Research Center            | Koret Foundation                               | .       | 2,000   | 3,000   | .       | 2,500   | 2,500   | 2,500   | .       |
| Capital Research Center            | Lillian S. Wells Foundation, Inc.              | .       | 50,000  | 50,000  | .       | 50,000  | .       | .       | .       |
| Capital Research Center            | Richard & Barbara Gaby Foundation              | .       | .       | .       | .       | 20,000  | 10,000  | 10,000  | 10,000  |
| Capital Research Center            | Scaife Affiliated Foundations                  | 185,000 | 235,000 | 235,000 | 250,000 | 250,000 | 225,000 | 175,000 | 175,000 |
| Capital Research Center            | Searle Freedom Trust                           | .       | .       | 25,000  | 25,000  | 35,000  | .       | 35,000  | 35,000  |
| Capital Research Center            | The Anschutz Foundation                        | 10,000  | 10,000  | 15,000  | 10,000  | 10,000  | 10,000  | 15,000  | .       |
| Capital Research Center            | The Armstrong Foundation                       | 2,000   | .       | .       | 2,000   | 2,000   | .       | 2,000   | 2,000   |
| Capital Research Center            | The Gordon and Mary Cain Foundation            | .       | 2,000   | .       | .       | .       | .       | .       | .       |
| Capital Research Center            | The Grover Hermann Foundation                  | 15,000  | 15,000  | 15,000  | .       | 20,000  | .       | .       | .       |
| Capital Research Center            | The Lynde and Harry Bradley Foundation, Inc.   | 130,000 | 85,000  | 105,000 | 110,000 | 165,000 | 85,000  | 90,000  | 105,000 |
| Capital Research Center            | The Richard Seth Staley Educational Foundation | 500     | .       | .       | .       | .       | .       | .       | 100     |
| Capital Research Center            | The Rodney Fund                                | 4,000   | .       | .       | .       | .       | 3,000   | 3,000   | .       |
| Capital Research Center            | The Roe Foundation                             | 10,000  | .       | 10,000  | 10,000  | 10,000  | .       | .       | .       |

| Recipient                | Foundation                                              | 2003    | 2004    | 2005    | 2006    | 2007    | 2008    | 2009    | 2010    |
|--------------------------|---------------------------------------------------------|---------|---------|---------|---------|---------|---------|---------|---------|
| Capital Research Center  | The Samuel Roberts Noble Foundation, Inc.               | .       | .       | .       | 60,000  | .       | .       | .       | .       |
| Capital Research Center  | The William H. Donner Foundation                        | 20,000  | 35,000  | 30,000  | 20,000  | 42,500  | 25,000  | 20,000  | 20,000  |
| Capital Research Center  | Vanguard Charitable Endowment Program                   | 1,000   | .       | 500     | 500     | 500     | 17,000  | 34,500  | 16,500  |
| Capital Research Center  | Walton Family Foundation, Inc.                          | .       | 1,000   | 1,000   | 1,000   | 1,000   | 1,000   | 1,000   | 1,000   |
| Cascade Policy Institute | Chase Foundation of Virginia                            | 5,000   | 9,500   | 9,500   | 9,500   | 9,000   | 9,000   | 9,000   | 10,000  |
| Cascade Policy Institute | Coors Affiliated Foundations                            | .       | .       | 30,000  | .       | .       | 30,000  | .       | .       |
| Cascade Policy Institute | Donors Trust/Donors Capital Fund                        | .       | .       | .       | .       | 20,000  | 275,600 | 423,000 | 335,000 |
| Cascade Policy Institute | Jaquelin Hume Foundation                                | 25,000  | 25,000  | .       | 25,000  | 25,000  | 25,000  | 30,000  | 50,000  |
| Cascade Policy Institute | M. J. Murdock Charitable Trust                          | .       | .       | 130,000 | .       | .       | 225,000 | .       | .       |
| Cascade Policy Institute | Searle Freedom Trust                                    | .       | 30,000  | .       | .       | .       | .       | .       | .       |
| Cascade Policy Institute | The Challenge Foundation                                | .       | .       | .       | 41,075  | 33,293  | 105,000 | .       | 40,000  |
| Cascade Policy Institute | The Jeld-Wen Foundation                                 | 50,000  | 60,000  | 45,000  | .       | 40,000  | .       | .       | .       |
| Cascade Policy Institute | The JM Foundation                                       | .       | .       | .       | 25,000  | .       | 25,000  | .       | .       |
| Cascade Policy Institute | The Lynde and Harry Bradley Foundation, Inc.            | .       | .       | 5,000   | 10,000  | 10,000  | .       | .       | .       |
| Cascade Policy Institute | The Roe Foundation                                      | 20,000  | .       | 25,000  | 25,000  | 50,000  | .       | 30,000  | 20,000  |
| Cato Institute           | Aequus Institute                                        | .       | .       | 2,500   | 2,500   | 2,500   | .       | 1,000   | .       |
| Cato Institute           | Assurant Health Foundation                              | .       | .       | .       | 100,000 | 100,000 | .       | .       | .       |
| Cato Institute           | Barbara and Barre Seid Foundation                       | 25,000  | .       | 5,000   | .       | .       | .       | .       | .       |
| Cato Institute           | Barney Family Foundation                                | .       | 50,000  | 60,000  | 100,000 | 50,000  | 50,000  | 50,000  | 10,000  |
| Cato Institute           | Carnegie Corporation of New York                        | .       | .       | 50,000  | .       | 50,000  | 25,000  | .       | 50,000  |
| Cato Institute           | Charles and Ann Johnson Foundation                      | .       | .       | .       | .       | .       | 1,000   | .       | 1,000   |
| Cato Institute           | Chase Foundation of Virginia                            | 21,000  | .       | 25,000  | 25,000  | 23,000  | 23,000  | 23,000  | 25,000  |
| Cato Institute           | Claws Foundation                                        | .       | .       | .       | .       | .       | .       | 100,000 | 500,000 |
| Cato Institute           | Coors Affiliated Foundations                            | 50,000  | 50,000  | .       | 75,000  | 75,000  | 150,000 | 150,000 | 150,000 |
| Cato Institute           | Daniels Fund                                            | .       | .       | 85,000  | .       | .       | .       | .       | .       |
| Cato Institute           | Dodge Jones Foundation                                  | .       | .       | .       | .       | .       | .       | .       | 1,500   |
| Cato Institute           | Donors Trust/Donors Capital Fund                        | 2,500   | 194,120 | 165,600 | 146,250 | 335,850 | 315,121 | 127,450 | 113,783 |
| Cato Institute           | Dunn's Foundation for the Advancement of Right Thinking | 185,000 | 100,000 | 100,000 | 290,000 | 325,000 | 325,000 | 750,000 | 250,000 |
| Cato Institute           | Earhart Foundation                                      | 50,500  | 30,000  | 30,000  | 82,000  | 53,000  | 86,000  | 67,500  | 31,225  |
| Cato Institute           | Ed Foundation                                           | 5,000   | 5,000   | .       | 50,000  | .       | 5,000   | .       | .       |
| Cato Institute           | ExxonMobil Foundation                                   | 25,000  | 15,000  | .       | .       | .       | .       | .       | .       |
| Cato Institute           | F. M. Kirby Foundation, Inc.                            | 22,500  | 22,500  | 25,000  | 25,000  | 27,500  | 27,500  | 30,000  | 30,000  |
| Cato Institute           | Foundation to Promote Open Society                      | .       | .       | .       | .       | .       | .       | .       | 80,000  |

| Recipient      | Foundation                                                   | 2003    | 2004    | 2005    | 2006    | 2007    | 2008    | 2009    | 2010      |
|----------------|--------------------------------------------------------------|---------|---------|---------|---------|---------|---------|---------|-----------|
| Cato Institute | Galashiels Fund, Ltd.                                        | .       | 100,000 | 110,000 | 120,000 | 240,000 | 125,000 | 130,000 | 1,130,000 |
| Cato Institute | General Motors Foundation, Inc.                              | 25,000  | 25,000  | 25,000  | 20,000  | 25,000  | .       | .       | .         |
| Cato Institute | Gilder Foundation, Inc.                                      | 50,000  | 50,000  | 50,000  | 15,000  | .       | .       | .       | .         |
| Cato Institute | Gordon V. & Helen C. Smith Foundation                        | 25,000  | .       | .       | 125,000 | .       | .       | .       | 100,000   |
| Cato Institute | Greater Kansas City Community Foundation                     | .       | .       | .       | 5,100   | 7,000   | .       | 10,000  | 5,100     |
| Cato Institute | Herrick Foundation                                           | .       | .       | 50,000  | 50,000  | 114,050 | 150,000 | .       | 75,000    |
| Cato Institute | Hilton Family Foundation                                     | 25,000  | .       | 35,000  | .       | 35,000  | .       | .       | 10,000    |
| Cato Institute | J. P. Humphreys Foundation                                   | .       | .       | .       | 10,000  | 28,800  | .       | .       | .         |
| Cato Institute | John Dawson Foundation                                       | 50,000  | 50,000  | 25,000  | .       | .       | 50,000  | .       | .         |
| Cato Institute | John Templeton Foundation                                    | .       | 50,000  | 103,200 | 106,100 | 44,820  | 54,780  | .       | .         |
| Cato Institute | John William Pope Foundation                                 | 100,000 | 100,000 | 100,000 | 100,000 | 75,000  | 75,000  | 50,000  | 25,000    |
| Cato Institute | K. C. Ames Foundation                                        | .       | 30,000  | .       | .       | .       | .       | .       | .         |
| Cato Institute | Koch Affiliated Foundations                                  | 250,000 | 250,000 | 250,000 | 250,000 | 250,000 | 270,000 | 250,000 | 7,350     |
| Cato Institute | Lovett & Ruth Peters Foundation                              | .       | .       | .       | .       | .       | 25,000  | .       | 100,000   |
| Cato Institute | Modzelewski Charitable Trust                                 | 110,000 | 102,750 | .       | .       | .       | .       | .       | .         |
| Cato Institute | Pierre F. and Enid Goodrich Foundation                       | 15,000  | .       | 50,000  | 15,000  | 30,000  | 30,000  | 30,000  | 25,000    |
| Cato Institute | Rose-Marie and Jack R. Anderson Foundation                   | .       | .       | 25,000  | 40,000  | 50,000  | 74,600  | 60,000  | 60,000    |
| Cato Institute | Scaife Affiliated Foundations                                | 60,000  | 125,000 | 125,000 | 60,000  | .       | 50,000  | 40,000  | 40,000    |
| Cato Institute | Searle Freedom Trust                                         | 100,000 | 50,000  | 50,000  | 100,000 | 200,000 | .       | 200,000 | 200,000   |
| Cato Institute | Smith Richardson Foundation, Inc.                            | .       | .       | 50,000  | .       | .       | .       | .       | .         |
| Cato Institute | Susquehanna Foundation                                       | 320,000 | 480,000 | 895,000 | 610,000 | 510,000 | 426,000 | .       | 100,000   |
| Cato Institute | The Achelis Foundation                                       | .       | 15,000  | .       | .       | .       | .       | .       | .         |
| Cato Institute | The Andrew Cader Foundation, Inc.                            | .       | 125,000 | 100,000 | .       | 75,000  | 50,000  | 25,000  | .         |
| Cato Institute | The Anschutz Foundation                                      | .       | .       | .       | .       | 45,000  | 75,000  | 60,000  | .         |
| Cato Institute | The Armstrong Foundation                                     | 5,000   | .       | 10,000  | 10,000  | 20,000  | 10,000  | .       | 10,000    |
| Cato Institute | The Atlantic Philanthropies                                  | .       | .       | .       | .       | .       | 750,000 | .       | .         |
| Cato Institute | The Bodman Foundation                                        | .       | .       | .       | 35,000  | .       | .       | .       | .         |
| Cato Institute | The Capital Group Companies Charitable Foundation            | .       | .       | .       | 5,000   | .       | .       | .       | 240       |
| Cato Institute | The Challenge Foundation                                     | .       | .       | .       | .       | 100,000 | 125,000 | 50,000  | 50,000    |
| Cato Institute | The Community Foundation Serving Richmond & Central Virginia | .       | .       | .       | .       | 5,000   | 5,000   | 5,000   | .         |
| Cato Institute | The E. L. Craig Foundation                                   | 100,000 | 100,000 | .       | 100,000 | 100,000 | 100,000 | 30,500  | 200,000   |
| Cato Institute | The Grover Hermann Foundation                                | .       | 7,500   | 7,500   | 7,500   | 5,000   | .       | .       | .         |
| Cato Institute | The Harry and Jeanette Weinberg Foundation, Inc.             | .       | 200,000 | .       | .       | .       | .       | .       | .         |

| Recipient                                                            | Foundation                                              | 2003    | 2004    | 2005    | 2006    | 2007    | 2008    | 2009    | 2010      |
|----------------------------------------------------------------------|---------------------------------------------------------|---------|---------|---------|---------|---------|---------|---------|-----------|
| Cato Institute                                                       | The J. M. Kaplan Fund, Inc.                             | 20,000  | .       | .       | .       | .       | .       | .       | .         |
| Cato Institute                                                       | The Jean I. & Charles H. Brunie Foundation              | .       | .       | 25,000  | 25,000  | .       | .       | .       | .         |
| Cato Institute                                                       | The Jeld-Wen Foundation                                 | 10,000  | 10,000  | 10,000  | .       | 10,000  | .       | .       | .         |
| Cato Institute                                                       | The JM Foundation                                       | .       | .       | 25,000  | .       | .       | .       | .       | .         |
| Cato Institute                                                       | The Kern Family Foundation, Inc.                        | 100,000 | 100,000 | 100,000 | .       | .       | .       | .       | .         |
| Cato Institute                                                       | The Lynde and Harry Bradley Foundation, Inc.            | 100,000 | 75,000  | 125,000 | 100,000 | 345,000 | 225,000 | 225,000 | 125,000   |
| Cato Institute                                                       | The Marcus Foundation, Inc.                             | .       | .       | .       | .       | .       | .       | .       | 5,000     |
| Cato Institute                                                       | The Richard Seth Staley Educational Foundation          | 2,000   | 1,953   | 2,500   | 6,000   | 6,000   | 3,000   | .       | .         |
| Cato Institute                                                       | The Rodney Fund                                         | 100,000 | 75,065  | 127,750 | 76,000  | .       | 102,000 | 85,000  | .         |
| Cato Institute                                                       | The Roe Foundation                                      | 5,000   | .       | 5,000   | .       | 10,000  | .       | 15,000  | 10,000    |
| Cato Institute                                                       | The San Francisco Foundation                            | 195,000 | 30,500  | 182,000 | 155,000 | 160,000 | 40,000  | 115,000 | 290,000   |
| Cato Institute                                                       | The TWS Foundation                                      | 20,000  | 50,000  | 50,000  | 74,600  | 50,000  | 10,000  | .       | .         |
| Cato Institute                                                       | The William and Flora Hewlett Foundation                | .       | .       | .       | 201,000 | .       | .       | .       | .         |
| Cato Institute                                                       | The William H. Donner Foundation                        | 20,000  | 20,000  | 20,000  | 20,000  | 25,000  | 20,000  | 20,000  | 20,000    |
| Cato Institute                                                       | Vanguard Charitable Endowment Program                   | 288,000 | 250,500 | 500,000 | 414,000 | 576,500 | 330,500 | 850,900 | 588,500   |
| Cato Institute                                                       | Walton Family Foundation, Inc.                          | .       | 3,000   | 3,000   | 3,000   | 3,000   | 3,000   | 3,000   | 3,000     |
| Cato Institute                                                       | WellPoint Foundation, Inc.                              | .       | .       | .       | .       | 50,000  | .       | .       | .         |
| Cato Institute                                                       | William K. Bowes, Jr. Foundation                        | 100,000 | 100,500 | 200,000 | 200,000 | 100,000 | 200,000 | 200,000 | 225,000   |
| Center for the Defense of Free Enterprise                            | Dorothy D. and Joseph A. Moller Foundation              | 5,000   | .       | .       | .       | .       | .       | .       | .         |
| Center for the Defense of Free Enterprise                            | ExxonMobil Foundation                                   | 40,000  | 130,000 | 60,000  | .       | .       | .       | .       | .         |
| Center for the Study of Carbon Dioxide and Global Change/CO2 Science | Donors Trust/Donors Capital Fund                        | .       | .       | .       | .       | 125,000 | 129,400 | 29,400  | .         |
| Center for the Study of Carbon Dioxide and Global Change/CO2 Science | ExxonMobil Foundation                                   | 40,000  | .       | 25,000  | .       | .       | .       | .       | .         |
| Center for the Study of Carbon Dioxide and Global Change/CO2 Science | Koch Affiliated Foundations                             | .       | .       | 35,000  | .       | 25,000  | .       | .       | .         |
| Center for the Study of Carbon Dioxide and Global Change/CO2 Science | Scaife Affiliated Foundations                           | 50,000  | .       | .       | .       | .       | .       | .       | .         |
| Center for the Study of Carbon Dioxide and Global Change/CO2 Science | The Lynde and Harry Bradley Foundation, Inc.            | .       | .       | .       | .       | .       | .       | 50,000  | .         |
| Coalition for American Jobs                                          | American Petroleum Institute                            | .       | .       | .       | .       | .       | .       | .       | 1,000,000 |
| Committee for a Constructive Tomorrow                                | Bialkin Family Foundation                               | .       | .       | .       | .       | .       | .       | 2,500   | .         |
| Committee for a Constructive Tomorrow                                | Chase Foundation of Virginia                            | .       | .       | .       | .       | .       | 1,000   | 2,000   | 2,000     |
| Committee for a Constructive Tomorrow                                | Dodge Jones Foundation                                  | .       | .       | .       | .       | .       | .       | 12,500  | 7,500     |
| Committee for a Constructive Tomorrow                                | Donors Trust/Donors Capital Fund                        | .       | .       | 5,000   | .       | 60,000  | 705,500 | 909,194 | 1,295,754 |
| Committee for a Constructive Tomorrow                                | Dunn's Foundation for the Advancement of Right Thinking | .       | .       | .       | .       | .       | .       | .       | 10,000    |
| Committee for a Constructive Tomorrow                                | ExxonMobil Foundation                                   | 72,000  | 125,000 | 90,000  | 70,000  | .       | .       | .       | .         |



| Recipient                             | Foundation                                              | 2003    | 2004    | 2005    | 2006    | 2007    | 2008    | 2009    | 2010    |
|---------------------------------------|---------------------------------------------------------|---------|---------|---------|---------|---------|---------|---------|---------|
| Committee for a Constructive Tomorrow | General Motors Foundation, Inc.                         | 25,000  | .       | .       | .       | .       | .       | .       | .       |
| Committee for a Constructive Tomorrow | Greater Kansas City Community Foundation                | .       | .       | .       | .       | .       | 1,000   | 1,000   | .       |
| Committee for a Constructive Tomorrow | Hilton Family Foundation                                | .       | .       | .       | .       | .       | .       | 1,000   | .       |
| Committee for a Constructive Tomorrow | John William Pope Foundation                            | 5,000   | 5,000   | .       | .       | .       | .       | .       | .       |
| Committee for a Constructive Tomorrow | Modzelewski Charitable Trust                            | .       | .       | .       | .       | .       | .       | .       | 2,000   |
| Committee for a Constructive Tomorrow | Scaife Affiliated Foundations                           | .       | 160,000 | 160,000 | 200,000 | 200,000 | 200,000 | 160,000 | 160,000 |
| Committee for a Constructive Tomorrow | Susquehanna Foundation                                  | .       | .       | .       | .       | .       | 1,000   | .       | .       |
| Committee for a Constructive Tomorrow | Taube Family Foundation                                 | .       | .       | .       | .       | .       | .       | .       | 500     |
| Committee for a Constructive Tomorrow | The Armstrong Foundation                                | .       | .       | .       | .       | .       | .       | 5,000   | 5,000   |
| Committee for a Constructive Tomorrow | The Challenge Foundation                                | .       | .       | .       | .       | .       | .       | 10,000  | .       |
| Competitive Enterprise Institute      | Aequus Institute                                        | .       | 7,500   | .       | 2,500   | 5,000   | .       | 2,000   | .       |
| Competitive Enterprise Institute      | American Petroleum Institute                            | .       | .       | .       | .       | .       | .       | 25,000  | .       |
| Competitive Enterprise Institute      | Barbara and Barre Seid Foundation                       | 30,000  | 25,700  | 152,490 | .       | .       | .       | .       | .       |
| Competitive Enterprise Institute      | Chase Foundation of Virginia                            | 20,000  | .       | 20,000  | 18,000  | 16,000  | .       | 16,000  | 19,000  |
| Competitive Enterprise Institute      | Claws Foundation                                        | .       | .       | .       | .       | .       | .       | 25,000  | 60,000  |
| Competitive Enterprise Institute      | Coors Affiliated Foundations                            | 40,000  | .       | .       | 50,000  | .       | .       | 45,000  | .       |
| Competitive Enterprise Institute      | Donors Trust/Donors Capital Fund                        | .       | 5,750   | 6,750   | 100,250 | 245,694 | 52,508  | 241,327 | 58,200  |
| Competitive Enterprise Institute      | Dunn's Foundation for the Advancement of Right Thinking | 445,000 | 500,000 | 500,000 | 455,000 | 545,000 | 545,000 | 815,000 | 505,000 |
| Competitive Enterprise Institute      | Earhart Foundation                                      | .       | 25,000  | 30,000  | .       | .       | 10,000  | 22,500  | 12,500  |
| Competitive Enterprise Institute      | Eli Lilly and Company Foundation                        | .       | .       | .       | .       | .       | 30,000  | 10,000  | .       |
| Competitive Enterprise Institute      | Ewing Marion Kauffman Foundation                        | .       | .       | .       | 132,500 | .       | .       | .       | .       |
| Competitive Enterprise Institute      | ExxonMobil Foundation                                   | 440,000 | 270,000 | 90,000  | .       | .       | .       | .       | .       |
| Competitive Enterprise Institute      | General Motors Foundation, Inc.                         | 115,000 | 50,000  | 65,000  | 15,000  | 25,000  | 25,000  | .       | .       |
| Competitive Enterprise Institute      | J. P. Humphreys Foundation                              | 40,000  | .       | 20,000  | 25,000  | 25,000  | 40,000  | .       | .       |
| Competitive Enterprise Institute      | John William Pope Foundation                            | 25,000  | 25,000  | 15,000  | 10,000  | 15,000  | 15,000  | 10,000  | 10,000  |
| Competitive Enterprise Institute      | K. C. Ames Foundation                                   | .       | 10,000  | .       | .       | .       | .       | .       | .       |
| Competitive Enterprise Institute      | Koch Affiliated Foundations                             | 27,320  | 54,640  | .       | .       | .       | .       | 34,079  | 9,200   |
| Competitive Enterprise Institute      | Modzelewski Charitable Trust                            | 20,000  | 30,000  | 30,000  | .       | .       | .       | .       | .       |
| Competitive Enterprise Institute      | Scaife Affiliated Foundations                           | 125,000 | 150,000 | 300,000 | 350,000 | 350,000 | 350,000 | 300,000 | 300,000 |
| Competitive Enterprise Institute      | Searle Freedom Trust                                    | 75,000  | 100,000 | 50,000  | 160,000 | 100,000 | 225,000 | 225,000 | 175,000 |
| Competitive Enterprise Institute      | Susquehanna Foundation                                  | .       | 10,000  | 30,000  | 45,000  | 25,000  | 25,000  | 27,000  | 5,000   |
| Competitive Enterprise Institute      | Taube Family Foundation                                 | .       | .       | .       | .       | .       | .       | .       | 250     |
| Competitive Enterprise Institute      | The Abstraction Fund                                    | .       | .       | .       | .       | .       | .       | 2,000   | .       |

| Recipient                           | Foundation                                                   | 2003   | 2004    | 2005    | 2006    | 2007    | 2008    | 2009   | 2010   |
|-------------------------------------|--------------------------------------------------------------|--------|---------|---------|---------|---------|---------|--------|--------|
| Competitive Enterprise Institute    | The Armstrong Foundation                                     | 5,000  | .       | .       | 5,000   | 30,000  | 10,000  | 2,500  | 10,000 |
| Competitive Enterprise Institute    | The Bodman Foundation                                        | .      | .       | .       | 35,000  | .       | .       | .      | .      |
| Competitive Enterprise Institute    | The Challenge Foundation                                     | .      | .       | .       | .       | .       | .       | 15,000 | 15,000 |
| Competitive Enterprise Institute    | The Chrysler Foundation                                      | .      | 35,000  | 50,000  | 50,000  | .       | .       | .      | .      |
| Competitive Enterprise Institute    | The Community Foundation Serving Richmond & Central Virginia | .      | .       | .       | .       | .       | .       | 5,000  | .      |
| Competitive Enterprise Institute    | The E. L. Craig Foundation                                   | .      | .       | .       | .       | .       | 5,000   | .      | .      |
| Competitive Enterprise Institute    | The Jean I. & Charles H. Brunie Foundation                   | .      | 10,000  | 10,000  | .       | .       | .       | .      | .      |
| Competitive Enterprise Institute    | The Lynde and Harry Bradley Foundation, Inc.                 | 50,000 | 50,000  | 125,000 | 125,000 | 135,000 | 35,000  | 75,000 | 65,000 |
| Competitive Enterprise Institute    | The Paul Singer Family Foundation                            | 20,000 | 20,000  | .       | .       | .       | .       | .      | .      |
| Competitive Enterprise Institute    | The Rodney Fund                                              | 3,000  | 6,000   | .       | .       | .       | .       | 7,000  | .      |
| Competitive Enterprise Institute    | The Roe Foundation                                           | 10,000 | .       | 10,000  | .       | 10,000  | .       | .      | .      |
| Competitive Enterprise Institute    | The TWS Foundation                                           | .      | .       | .       | 1,000   | 10,000  | 10,000  | .      | .      |
| Competitive Enterprise Institute    | The William H. Donner Foundation                             | .      | .       | .       | .       | .       | .       | .      | 10,000 |
| Competitive Enterprise Institute    | Vanguard Charitable Endowment Program                        | 42,000 | 19,000  | 29,500  | 47,000  | 94,000  | 102,000 | 99,500 | 80,300 |
| Congress of Racial Equality         | Barbara and Barre Seid Foundation                            | .      | .       | .       | 25,000  | .       | .       | .      | .      |
| Congress of Racial Equality         | ExxonMobil Foundation                                        | 40,000 | 135,000 | 75,000  | .       | .       | .       | .      | .      |
| Consumer Alert                      | Chase Foundation of Virginia                                 | 9,000  | .       | 9,000   | .       | .       | .       | .      | .      |
| Consumer Alert                      | Dunn's Foundation for the Advancement of Right Thinking      | .      | 10,000  | 10,000  | .       | .       | .       | .      | .      |
| Consumer Alert                      | ExxonMobil Foundation                                        | 15,000 | 25,000  | .       | .       | .       | .       | .      | .      |
| Consumer Alert                      | General Motors Foundation, Inc.                              | 25,000 | 40,000  | .       | .       | .       | .       | .      | .      |
| Consumer Alert                      | Koch Affiliated Foundations                                  | .      | 10,000  | .       | .       | .       | .       | .      | .      |
| Consumer Alert                      | Modzelewski Charitable Trust                                 | 5,000  | 5,000   | .       | .       | .       | .       | .      | .      |
| Consumer Alert                      | The Roe Foundation                                           | .      | .       | 5,000   | .       | .       | .       | .      | .      |
| Consumer Alert                      | The San Francisco Foundation                                 | .      | 2,000   | .       | .       | .       | .       | .      | .      |
| Consumer Energy Alliance            | American Petroleum Institute                                 | .      | .       | .       | .       | .       | 30,000  | 67,500 | 35,000 |
| Environmental Literacy Council      | Earhart Foundation                                           | 15,000 | .       | 25,000  | .       | .       | .       | .      | .      |
| Environmental Literacy Council      | ExxonMobil Foundation                                        | 40,000 | 40,000  | 75,000  | .       | 25,000  | 40,000  | .      | .      |
| Environmental Literacy Council      | Koch Affiliated Foundations                                  | 57,516 | 50,000  | 50,000  | 50,000  | 50,000  | .       | .      | .      |
| Environmental Literacy Council      | Scaife Affiliated Foundations                                | 75,000 | 75,000  | 75,000  | 75,000  | 75,000  | 75,000  | .      | .      |
| Environmental Literacy Council      | The Armstrong Foundation                                     | 5,000  | .       | .       | 2,500   | 2,500   | .       | .      | .      |
| Environmental Literacy Council      | The Bodman Foundation                                        | 30,000 | .       | .       | .       | .       | .       | .      | .      |
| Environmental Literacy Council      | The William H. Donner Foundation                             | 15,000 | .       | .       | .       | .       | .       | .      | .      |
| Free Enterprise Education Institute | Dodge Jones Foundation                                       | .      | 10,000  | .       | .       | .       | .       | .      | .      |

| Recipient                           | Foundation                                              | 2003   | 2004    | 2005    | 2006    | 2007    | 2008    | 2009    | 2010      |
|-------------------------------------|---------------------------------------------------------|--------|---------|---------|---------|---------|---------|---------|-----------|
| Free Enterprise Education Institute | Donors Trust/Donors Capital Fund                        | .      | .       | 125,340 | 305,847 | 156,500 | 75,000  | .       | .         |
| Free Enterprise Education Institute | ExxonMobil Foundation                                   | 50,000 | 10,000  | 70,000  | .       | .       | .       | .       | .         |
| Free Enterprise Education Institute | Searle Freedom Trust                                    | .      | .       | .       | 75,000  | .       | .       | .       | .         |
| Free Enterprise Education Institute | The JM Foundation                                       | .      | .       | .       | .       | 5,000   | .       | .       | .         |
| FreedomWorks                        | American Petroleum Institute                            | .      | .       | .       | .       | .       | 75,000  | 55,000  | .         |
| FreedomWorks                        | Charles and Ann Johnson Foundation                      | .      | .       | .       | .       | .       | .       | .       | 1,000     |
| FreedomWorks                        | Chase Foundation of Virginia                            | .      | .       | .       | .       | .       | .       | .       | 15,000    |
| FreedomWorks                        | Galashiels Fund, Ltd.                                   | .      | .       | 25,000  | 50,000  | .       | .       | .       | .         |
| FreedomWorks                        | H. Smith Richardson Charitable Trust                    | 5,000  | .       | .       | .       | .       | .       | .       | .         |
| FreedomWorks                        | Modzelewski Charitable Trust                            | 25,000 | .       | 25,000  | .       | .       | .       | .       | .         |
| FreedomWorks                        | Searle Freedom Trust                                    | .      | .       | .       | .       | .       | .       | .       | 60,000    |
| FreedomWorks                        | Susquehanna Foundation                                  | .      | .       | .       | .       | 10,000  | 5,000   | 85,000  | 175,000   |
| FreedomWorks                        | The Armstrong Foundation                                | 2,000  | .       | .       | 20,000  | .       | .       | 15,000  | 20,000    |
| FreedomWorks                        | The Challenge Foundation                                | .      | .       | .       | .       | .       | .       | 20,000  | 20,000    |
| FreedomWorks                        | The JM Foundation                                       | .      | .       | .       | 40,000  | .       | .       | .       | .         |
| FreedomWorks                        | The Richard and Helen DeVos Foundation                  | .      | .       | .       | .       | .       | .       | .       | 250,000   |
| FreedomWorks                        | The Rodney Fund                                         | 9,000  | 11,000  | .       | .       | .       | .       | 2,000   | .         |
| FreedomWorks                        | The Roe Foundation                                      | 2,500  | .       | .       | .       | .       | .       | .       | .         |
| FreedomWorks Foundation             | Coors Affiliated Foundations                            | .      | .       | .       | .       | .       | .       | 25,000  | .         |
| FreedomWorks Foundation             | Dean & Barbara White Family Foundation, Inc.            | .      | .       | .       | .       | .       | .       | .       | 1,000,000 |
| FreedomWorks Foundation             | Donors Trust/Donors Capital Fund                        | .      | .       | .       | 2,000   | 1,000   | 6,000   | 25,000  | 42,000    |
| FreedomWorks Foundation             | Dunn's Foundation for the Advancement of Right Thinking | .      | .       | .       | .       | .       | .       | .       | 130,000   |
| FreedomWorks Foundation             | Ed Foundation                                           | .      | .       | .       | .       | .       | 50,000  | 50,000  | .         |
| FreedomWorks Foundation             | Galashiels Fund, Ltd.                                   | .      | .       | .       | .       | 110,000 | .       | .       | .         |
| FreedomWorks Foundation             | Scaife Affiliated Foundations                           | .      | 250,000 | 250,000 | 200,000 | 200,000 | 140,000 | 125,000 | 125,000   |
| FreedomWorks Foundation             | Searle Freedom Trust                                    | .      | .       | .       | .       | .       | 50,000  | .       | .         |
| FreedomWorks Foundation             | Susquehanna Foundation                                  | .      | .       | 10,000  | .       | .       | .       | .       | .         |
| FreedomWorks Foundation             | The Anschutz Foundation                                 | .      | 10,000  | .       | .       | .       | 10,000  | 10,000  | .         |
| FreedomWorks Foundation             | The Armstrong Foundation                                | .      | .       | 10,000  | .       | 40,000  | 15,000  | .       | .         |
| FreedomWorks Foundation             | The Challenge Foundation                                | .      | .       | .       | .       | .       | 10,000  | .       | .         |
| FreedomWorks Foundation             | The Jeld-Wen Foundation                                 | .      | .       | 200,000 | .       | 100,000 | .       | .       | .         |
| FreedomWorks Foundation             | The JM Foundation                                       | .      | .       | .       | .       | .       | 40,000  | .       | .         |
| FreedomWorks Foundation             | The Lynde and Harry Bradley Foundation, Inc.            | 10,000 | 40,000  | 25,000  | 5,000   | 80,000  | 25,000  | 105,000 | 150,000   |

| Recipient                      | Foundation                                              | 2003    | 2004    | 2005    | 2006      | 2007      | 2008      | 2009      | 2010      |
|--------------------------------|---------------------------------------------------------|---------|---------|---------|-----------|-----------|-----------|-----------|-----------|
| FreedomWorks Foundation        | The Richard and Helen DeVos Foundation                  | .       | .       | .       | .         | 100,000   | 100,000   | 250,000   | .         |
| FreedomWorks Foundation        | The T. Boone Pickens Foundation                         | .       | .       | .       | .         | 1,000,000 | .         | .         | .         |
| FreedomWorks Foundation        | Vanguard Charitable Endowment Program                   | .       | .       | .       | .         | 30,000    | 30,000    | 61,000    | 90,000    |
| Frontiers of Freedom Institute | Donors Trust/Donors Capital Fund                        | .       | .       | .       | 50,000    | .         | .         | .         | .         |
| George C. Marshall Institute   | Chase Foundation of Virginia                            | 3,000   | .       | 3,000   | 2,500     | 2,000     | 2,000     | .         | .         |
| George C. Marshall Institute   | Dunn's Foundation for the Advancement of Right Thinking | 20,000  | 5,000   | .       | 20,000    | .         | .         | .         | .         |
| George C. Marshall Institute   | Earhart Foundation                                      | 25,000  | 25,000  | 55,000  | 55,000    | 40,000    | 40,000    | 30,000    | 30,000    |
| George C. Marshall Institute   | ExxonMobil Foundation                                   | 95,000  | 145,000 | 90,000  | .         | .         | .         | .         | .         |
| George C. Marshall Institute   | General Motors Foundation, Inc.                         | 10,000  | 10,000  | .       | .         | .         | .         | .         | .         |
| George C. Marshall Institute   | H. Smith Richardson Charitable Trust                    | .       | .       | 248,570 | .         | .         | .         | .         | .         |
| George C. Marshall Institute   | John William Pope Foundation                            | .       | .       | .       | 1,000     | .         | .         | .         | .         |
| George C. Marshall Institute   | K. C. Ames Foundation                                   | .       | 10,000  | .       | .         | .         | .         | .         | .         |
| George C. Marshall Institute   | Koch Affiliated Foundations                             | .       | .       | .       | 70,000    | 70,000    | 70,000    | 70,000    | .         |
| George C. Marshall Institute   | Scaife Affiliated Foundations                           | 155,000 | 190,000 | 325,000 | 255,000   | 255,000   | 255,000   | 230,000   | 230,000   |
| George C. Marshall Institute   | Searle Freedom Trust                                    | 20,000  | .       | .       | .         | .         | 60,000    | .         | .         |
| George C. Marshall Institute   | The Achelis Foundation                                  | 50,000  | .       | .       | .         | .         | .         | .         | .         |
| George C. Marshall Institute   | The Chrysler Foundation                                 | .       | .       | 5,000   | .         | .         | .         | .         | .         |
| George C. Marshall Institute   | The Lynde and Harry Bradley Foundation, Inc.            | 115,000 | 115,000 | 105,000 | 105,000   | 110,000   | 110,000   | 90,000    | 90,000    |
| Heartland Institute            | American Petroleum Institute                            | .       | .       | .       | .         | .         | 25,000    | .         | .         |
| Heartland Institute            | Assurant Health Foundation                              | .       | 20,000  | 30,000  | 60,000    | .         | .         | .         | .         |
| Heartland Institute            | Barbara and Barre Seid Foundation                       | 154,689 | 176,788 | .       | .         | 43,000    | .         | .         | .         |
| Heartland Institute            | Barney Family Foundation                                | .       | .       | .       | .         | .         | 25,000    | 25,000    | 50,000    |
| Heartland Institute            | Chase Foundation of Virginia                            | 30,000  | 30,500  | 25,000  | 25,000    | 15,000    | 15,000    | 15,000    | 25,000    |
| Heartland Institute            | Coors Affiliated Foundations                            | 30,000  | .       | .       | .         | .         | .         | .         | .         |
| Heartland Institute            | Covenant Foundation, Inc.                               | .       | .       | 5,000   | .         | .         | .         | .         | .         |
| Heartland Institute            | Dodge Jones Foundation                                  | .       | .       | .       | .         | .         | .         | .         | 2,000     |
| Heartland Institute            | Donors Trust/Donors Capital Fund                        | .       | .       | 550,427 | 1,034,703 | 2,955,937 | 4,621,750 | 2,688,280 | 1,666,400 |
| Heartland Institute            | Dunn's Foundation for the Advancement of Right Thinking | .       | .       | .       | .         | .         | .         | 50,000    | .         |
| Heartland Institute            | Ed Uihlein Family Foundation                            | .       | .       | .       | .         | .         | .         | .         | 1,000     |
| Heartland Institute            | Eli Lilly and Company Foundation                        | .       | 15,000  | 15,000  | 15,000    | 20,000    | .         | .         | .         |
| Heartland Institute            | ExxonMobil Foundation                                   | 85,000  | 90,000  | 29,000  | 90,000    | .         | .         | .         | .         |
| Heartland Institute            | General Motors Foundation, Inc.                         | 40,000  | 50,000  | 25,000  | 25,000    | 25,000    | 25,000    | .         | 15,000    |
| Heartland Institute            | J. P. Humphreys Foundation                              | 5,000   | 1,000   | .       | .         | .         | 5,000     | 5,000     | 5,000     |

| Recipient           | Foundation                                   | 2003    | 2004    | 2005    | 2006    | 2007    | 2008      | 2009    | 2010    |
|---------------------|----------------------------------------------|---------|---------|---------|---------|---------|-----------|---------|---------|
| Heartland Institute | Jaquelin Hume Foundation                     | 25,000  | .       | .       | 25,000  | .       | .         | 10,000  | 25,000  |
| Heartland Institute | John William Pope Foundation                 | .       | .       | .       | .       | 25,000  | 25,000    | 25,000  | 25,000  |
| Heartland Institute | K. C. Ames Foundation                        | .       | 10,000  | .       | .       | .       | .         | .       | .       |
| Heartland Institute | Mercer Family Foundation                     | .       | .       | .       | .       | .       | .         | 500,000 | 370,000 |
| Heartland Institute | Searle Freedom Trust                         | .       | .       | .       | .       | .       | .         | 150,000 | .       |
| Heartland Institute | The Achelis Foundation                       | 15,000  | 15,000  | .       | .       | .       | .         | .       | .       |
| Heartland Institute | The Armstrong Foundation                     | 2,500   | .       | .       | 5,000   | 5,000   | .         | 5,000   | 5,000   |
| Heartland Institute | The Bodman Foundation                        | .       | .       | .       | 15,000  | .       | .         | .       | .       |
| Heartland Institute | The Challenge Foundation                     | .       | .       | .       | .       | .       | .         | 5,000   | .       |
| Heartland Institute | The Chrysler Foundation                      | .       | 40,000  | 40,000  | 25,000  | .       | .         | .       | .       |
| Heartland Institute | The E. L. Craig Foundation                   | .       | 5,000   | 5,000   | .       | .       | .         | .       | .       |
| Heartland Institute | The Grover Hermann Foundation                | .       | 10,000  | 10,000  | .       | .       | .         | .       | .       |
| Heartland Institute | The Kern Family Foundation, Inc.             | .       | 10,000  | 15,000  | .       | .       | .         | .       | .       |
| Heartland Institute | The Lynde and Harry Bradley Foundation, Inc. | 105,000 | 125,000 | 105,000 | 100,000 | 75,000  | 25,000    | 125,000 | 150,000 |
| Heartland Institute | The Rodney Fund                              | 12,000  | 9,000   | 15,000  | 12,000  | .       | 12,000    | 8,000   | .       |
| Heartland Institute | The Roe Foundation                           | .       | .       | 5,000   | .       | .       | .         | .       | .       |
| Heartland Institute | Vanguard Charitable Endowment Program        | 1,000   | 500     | 2,500   | 3,000   | 11,000  | 19,500    | 25,000  | 27,500  |
| Heartland Institute | Walton Family Foundation, Inc.               | 110,000 | 90,000  | .       | 90,000  | .       | .         | .       | .       |
| Heritage Foundation | Aequus Institute                             | 100,000 | 100,000 | 100,000 | 100,000 | 100,000 | 100,000   | 75,000  | 100,000 |
| Heritage Foundation | Barbara and Barre Seid Foundation            | .       | .       | 5,000   | .       | .       | .         | .       | .       |
| Heritage Foundation | Barney Family Foundation                     | .       | 50,000  | 110,000 | 100,000 | 100,000 | 100,000   | 100,000 | 100,000 |
| Heritage Foundation | Bialkin Family Foundation                    | .       | .       | 7,500   | 7,500   | 15,000  | 1,011,480 | 10,000  | 10,000  |
| Heritage Foundation | Charles and Ann Johnson Foundation           | 2,500   | .       | .       | 6,000   | .       | 5,000     | .       | 5,000   |
| Heritage Foundation | Communities Foundation of Texas, Inc.        | .       | .       | .       | .       | .       | 20,000    | 41,700  | 20,000  |
| Heritage Foundation | Coors Affiliated Foundations                 | 200,000 | 200,000 | 200,000 | 200,000 | 200,000 | 150,000   | 150,000 | 150,000 |
| Heritage Foundation | Daniels Fund                                 | .       | 75,000  | 75,000  | .       | .       | .         | .       | .       |
| Heritage Foundation | Dodge Jones Foundation                       | .       | .       | .       | .       | .       | .         | 10,000  | 20,000  |
| Heritage Foundation | Donors Trust/Donors Capital Fund             | 7,500   | 24,700  | 26,850  | 37,000  | 36,250  | 43,550    | 60,515  | 53,300  |
| Heritage Foundation | Dorothy D. and Joseph A. Moller Foundation   | .       | 120,000 | .       | 120,000 | .       | .         | .       | .       |
| Heritage Foundation | Douglas & Maria DeVos Foundation             | .       | .       | 25,000  | 25,000  | .       | 25,000    | 25,000  | .       |
| Heritage Foundation | Earhart Foundation                           | .       | .       | .       | .       | 10,000  | .         | 10,000  | .       |
| Heritage Foundation | Ed Foundation                                | .       | 5,000   | .       | 50,000  | .       | 10,000    | .       | .       |
| Heritage Foundation | Ed Uihlein Family Foundation                 | .       | .       | .       | .       | .       | 25,000    | .       | 20,000  |

| Recipient           | Foundation                                                   | 2003      | 2004    | 2005      | 2006      | 2007      | 2008      | 2009      | 2010      |
|---------------------|--------------------------------------------------------------|-----------|---------|-----------|-----------|-----------|-----------|-----------|-----------|
| Heritage Foundation | Eli Lilly and Company Foundation                             | 10,000    | 10,000  | 10,000    | 10,000    | 20,000    | 10,000    | .         | .         |
| Heritage Foundation | Ewing Marion Kauffman Foundation                             | .         | .       | .         | .         | 40,000    | .         | .         | .         |
| Heritage Foundation | ExxonMobil Foundation                                        | 95,000    | .       | 30,000    | .         | .         | .         | .         | .         |
| Heritage Foundation | F. M. Kirby Foundation, Inc.                                 | 110,000   | 110,000 | 110,000   | 110,000   | 120,000   | 120,000   | 120,000   | 120,000   |
| Heritage Foundation | General Motors Foundation, Inc.                              | 25,000    | 25,000  | 25,000    | .         | 25,000    | .         | .         | .         |
| Heritage Foundation | Gordon V. & Helen C. Smith Foundation                        | 10,000    | .       | .         | 250,000   | .         | .         | .         | 200,000   |
| Heritage Foundation | Greater Kansas City Community Foundation                     | .         | .       | .         | .         | 4,300     | 7,300     | 21,500    | 7,850     |
| Heritage Foundation | Herrick Foundation                                           | 500,000   | 250,000 | 2,000,000 | 500,000   | 430,000   | 350,000   | 1,000,000 | 250,000   |
| Heritage Foundation | Hilton Family Foundation                                     | 2,619     | .       | .         | 2,500     | .         | .         | .         | 2,500     |
| Heritage Foundation | Howard Charitable Foundation                                 | .         | .       | .         | 5,000,000 | 5,000,000 | 5,000,000 | 1,000,000 | 1,000,000 |
| Heritage Foundation | Jaquelin Hume Foundation                                     | 50,000    | 75,000  | 75,000    | .         | 50,000    | 500,000   | 500,000   | 250,000   |
| Heritage Foundation | John Dawson Foundation                                       | 100,000   | 100,400 | 100,000   | .         | 100,000   | 100,000   | 100,000   | .         |
| Heritage Foundation | John Templeton Foundation                                    | .         | .       | 843,314   | 668,314   | 377,550   | 187,493   | 93,271    | 50,000    |
| Heritage Foundation | John William Pope Foundation                                 | 100,000   | 100,000 | 100,000   | 100,000   | 75,000    | 75,000    | 50,000    | 50,000    |
| Heritage Foundation | Koch Affiliated Foundations                                  | 405,000   | 465,000 | 465,000   | 465,000   | 465,000   | 225,000   | 618,571   | 500,000   |
| Heritage Foundation | Koret Foundation                                             | .         | 2,500   | 5,000     | .         | 5,000     | .         | .         | .         |
| Heritage Foundation | Lillian S. Wells Foundation, Inc.                            | 300,000   | 900,000 | 700,000   | 500,000   | 500,000   | 1,005,164 | 500,000   | 500,000   |
| Heritage Foundation | Lovett & Ruth Peters Foundation                              | .         | .       | .         | .         | 100,000   | .         | 25,000    | 25,000    |
| Heritage Foundation | M. J. Murdock Charitable Trust                               | .         | 300,000 | 300,000   | .         | 375,000   | 375,000   | .         | .         |
| Heritage Foundation | Pierre F. and Enid Goodrich Foundation                       | 15,000    | .       | 15,000    | 15,000    | 25,000    | 25,000    | 25,000    | 20,000    |
| Heritage Foundation | Richard & Barbara Gaby Foundation                            | .         | .       | .         | 200,000   | 500,000   | .         | 504,560   | 500,000   |
| Heritage Foundation | Scaife Affiliated Foundations                                | 2,400,000 | .       | .         | 800,000   | 900,000   | 800,000   | 600,000   | 1,850,000 |
| Heritage Foundation | Searle Freedom Trust                                         | 100,000   | 100,000 | 100,000   | 100,000   | .         | 80,000    | 125,000   | 295,000   |
| Heritage Foundation | The Anschutz Foundation                                      | 15,000    | .       | .         | .         | 175,000   | 100,000   | .         | .         |
| Heritage Foundation | The Armstrong Foundation                                     | 25,000    | 25,000  | 25,000    | 25,000    | 100,000   | 100,000   | 100,000   | 100,000   |
| Heritage Foundation | The Bristol-Myers Squibb Foundation, Inc.                    | 10,000    | 10,000  | 10,000    | 10,000    | .         | .         | .         | .         |
| Heritage Foundation | The Capital Group Companies Charitable Foundation            | .         | .       | .         | 5,000     | 1,000     | 2,500     | 6,000     | .         |
| Heritage Foundation | The Challenge Foundation                                     | .         | .       | .         | .         | .         | 10,000    | 25,000    | 25,000    |
| Heritage Foundation | The Chisholm Foundation                                      | 15,000    | 10,000  | 15,000    | .         | .         | .         | 10,000    | 15,000    |
| Heritage Foundation | The Community Foundation Serving Richmond & Central Virginia | .         | .       | .         | .         | 5,000     | 10,000    | 10,000    | .         |
| Heritage Foundation | The Grover Hermann Foundation                                | 200,000   | 200,000 | 225,000   | 225,000   | .         | .         | .         | .         |
| Heritage Foundation | The Harry and Jeanette Weinberg Foundation, Inc.             | 200,000   | .       | .         | .         | .         | .         | .         | .         |
| Heritage Foundation | The Jeld-Wen Foundation                                      | 10,000    | 10,000  | 10,000    | .         | 10,000    | .         | .         | .         |

| Recipient                                       | Foundation                                     | 2003    | 2004      | 2005      | 2006      | 2007      | 2008      | 2009      | 2010      |
|-------------------------------------------------|------------------------------------------------|---------|-----------|-----------|-----------|-----------|-----------|-----------|-----------|
| Heritage Foundation                             | The JM Foundation                              | 25,000  | .         | 25,000    | .         | .         | .         | .         | 25,000    |
| Heritage Foundation                             | The Kern Family Foundation, Inc.               | .       | .         | .         | .         | .         | 381,523   | 265,512   | .         |
| Heritage Foundation                             | The Lynde and Harry Bradley Foundation, Inc.   | 322,500 | 375,000   | 435,000   | 290,000   | 340,000   | 245,000   | 228,500   | 225,000   |
| Heritage Foundation                             | The Marcus Foundation, Inc.                    | .       | .         | 5,000     | .         | .         | .         | .         | 5,000     |
| Heritage Foundation                             | The MeadWestvaco Foundation                    | 25,000  | .         | .         | 25,000    | .         | 25,000    | 25,000    | .         |
| Heritage Foundation                             | The Richard and Helen DeVos Foundation         | 100,000 | 600,000   | 600,000   | 600,000   | 1,000,000 | 3,000,000 | 1,000,000 | 300,000   |
| Heritage Foundation                             | The Richard Seth Staley Educational Foundation | 82,257  | .         | 149,000   | 160,000   | 150,000   | 100,775   | 91,350    | 76,620    |
| Heritage Foundation                             | The Rodney Fund                                | 8,000   | 9,000     | .         | .         | .         | .         | .         | .         |
| Heritage Foundation                             | The Roe Foundation                             | 75,000  | 75,000    | 80,000    | 80,000    | .         | .         | 100,000   | 100,000   |
| Heritage Foundation                             | The Samuel Roberts Noble Foundation, Inc.      | .       | 5,000,000 | .         | .         | .         | .         | .         | .         |
| Heritage Foundation                             | The Starr Foundation                           | .       | .         | .         | .         | .         | .         | .         | .         |
| Heritage Foundation                             | The UPS Foundation                             | .       | .         | 25,000    | 25,000    | 25,000    | .         | .         | 25,000    |
| Heritage Foundation                             | The William and Flora Hewlett Foundation       | .       | .         | .         | .         | 450,000   | .         | .         | .         |
| Heritage Foundation                             | The William H. Donner Foundation               | 25,000  | 25,000    | 25,000    | 25,000    | 45,000    | 25,000    | 25,000    | 57,000    |
| Heritage Foundation                             | Vanguard Charitable Endowment Program          | 60,000  | 85,000    | 176,000   | 189,850   | 421,750   | 274,000   | 361,500   | 285,500   |
| Heritage Foundation                             | Walton Family Foundation, Inc.                 | .       | 5,000     | .         | .         | 5,000     | 5,000     | 5,000     | 5,000     |
| Heritage Foundation                             | William E. Simon Foundation, Inc.              | .       | 50,000    | 50,000    | 50,000    | 75,000    | 75,000    | 175,000   | 100,000   |
| Heritage Foundation                             | William Howard Flowers, Jr. Foundation, Inc.   | .       | .         | 10,000    | 10,000    | 10,000    | 10,000    | 10,000    | 20,000    |
| Hoover Institution on War, Revolution and Peace | Alfred C. Munger Foundation                    | 250,000 | 300,000   | 300,000   | 300,000   | 300,000   | 300,000   | 300,000   | 300,000   |
| Hoover Institution on War, Revolution and Peace | Annenberg Foundation                           | 500,000 | 2,000,000 | 2,100,000 | .         | .         | 3,400,000 | .         | 3,300,000 |
| Hoover Institution on War, Revolution and Peace | Barney Family Foundation                       | .       | .         | .         | .         | .         | 25,000    | 25,000    | 25,000    |
| Hoover Institution on War, Revolution and Peace | Charles and Ann Johnson Foundation             | .       | 130,020   | .         | .         | .         | .         | 565,675   | 500,000   |
| Hoover Institution on War, Revolution and Peace | Donors Trust/Donors Capital Fund               | .       | .         | .         | 10,000    | 1,000     | 1,500     | 11,500    | .         |
| Hoover Institution on War, Revolution and Peace | Earhart Foundation                             | 103,000 | .         | 35,000    | .         | 95,000    | 86,720    | .         | .         |
| Hoover Institution on War, Revolution and Peace | Eli Lilly and Company Foundation               | .       | .         | .         | .         | 20,000    | 10,000    | 10,000    | .         |
| Hoover Institution on War, Revolution and Peace | Ewing Marion Kauffman Foundation               | .       | .         | .         | .         | .         | .         | 25,000    | .         |
| Hoover Institution on War, Revolution and Peace | ExxonMobil Foundation                          | 30,000  | .         | 20,000    | .         | .         | .         | .         | .         |
| Hoover Institution on War, Revolution and Peace | General Motors Foundation, Inc.                | 40,000  | .         | .         | .         | .         | .         | .         | .         |
| Hoover Institution on War, Revolution and Peace | Howard Charitable Foundation                   | .       | .         | .         | 5,000,000 | 1,000,000 | 1,000,000 | 250,000   | 500,000   |
| Hoover Institution on War, Revolution and Peace | Jaquelin Hume Foundation                       | .       | .         | .         | .         | .         | .         | .         | 100,000   |
| Hoover Institution on War, Revolution and Peace | John Templeton Foundation                      | 136,500 | .         | .         | .         | .         | .         | .         | .         |
| Hoover Institution on War, Revolution and Peace | K. C. Ames Foundation                          | .       | 30,000    | .         | .         | .         | .         | .         | .         |
| Hoover Institution on War, Revolution and Peace | Koret Foundation                               | 275,000 | 324,100   | .         | .         | .         | .         | .         | .         |

| Recipient                                       | Foundation                                     | 2003    | 2004    | 2005      | 2006      | 2007      | 2008      | 2009    | 2010    |
|-------------------------------------------------|------------------------------------------------|---------|---------|-----------|-----------|-----------|-----------|---------|---------|
| Hoover Institution on War, Revolution and Peace | Lakeside Foundation                            | 800,000 | 300,000 | 1,000,000 | 1,250,000 | 800,000   | 550,000   | 600,000 | 350,000 |
| Hoover Institution on War, Revolution and Peace | Malott Family Foundation                       | 20,000  | 10,000  | 25,000    | 25,000    | 25,000    | 25,000    | .       | 500     |
| Hoover Institution on War, Revolution and Peace | Rose-Marie and Jack R. Anderson Foundation     | 50,000  | 50,000  | 100,000   | .         | 150,000   | 200,000   | 200,000 | 200,000 |
| Hoover Institution on War, Revolution and Peace | Scaife Affiliated Foundations                  | .       | 500,000 | .         | .         | 650,000   | .         | 300,000 | .       |
| Hoover Institution on War, Revolution and Peace | Searle Freedom Trust                           | .       | .       | .         | .         | .         | 200,000   | .       | 100,000 |
| Hoover Institution on War, Revolution and Peace | Smith Richardson Foundation, Inc.              | 47,400  | .       | 224,388   | 581,458   | 250,000   | 330,683   | 250,000 | 255,452 |
| Hoover Institution on War, Revolution and Peace | Stephen Bechtel Fund                           | .       | .       | .         | .         | .         | 100,000   | .       | .       |
| Hoover Institution on War, Revolution and Peace | Taube Family Foundation                        | 200,000 | .       | .         | 210,000   | .         | .         | .       | .       |
| Hoover Institution on War, Revolution and Peace | The Ambrose Monell Foundation                  | 100,000 | 100,000 | 100,000   | 100,000   | 100,000   | 100,000   | 100,000 | 50,000  |
| Hoover Institution on War, Revolution and Peace | The Anschutz Foundation                        | .       | .       | .         | .         | .         | 15,000    | .       | .       |
| Hoover Institution on War, Revolution and Peace | The Hofmann Family Foundation                  | 100,000 | .       | 250,000   | 100,000   | 100,000   | 100,000   | .       | 100,000 |
| Hoover Institution on War, Revolution and Peace | The Jeld-Wen Foundation                        | 10,000  | 10,000  | 10,000    | .         | 10,000    | .         | .       | .       |
| Hoover Institution on War, Revolution and Peace | The JM Foundation                              | .       | 30,000  | 30,000    | .         | .         | 40,000    | 40,000  | 40,000  |
| Hoover Institution on War, Revolution and Peace | The Lynde and Harry Bradley Foundation, Inc.   | 330,000 | 355,000 | 305,000   | 385,000   | 280,000   | 305,000   | 280,000 | 380,000 |
| Hoover Institution on War, Revolution and Peace | The Marcus Foundation, Inc.                    | .       | 5,000   | 5,000     | 15,000    | .         | .         | .       | .       |
| Hoover Institution on War, Revolution and Peace | The Richard Seth Staley Educational Foundation | 250     | .       | .         | 1,000     | .         | .         | .       | .       |
| Hoover Institution on War, Revolution and Peace | The San Francisco Foundation                   | .       | 8,000   | 11,500    | 8,000     | .         | 14,200    | 26,000  | 10,000  |
| Hoover Institution on War, Revolution and Peace | The Thomas and Stacey Siebel Foundation        | .       | .       | .         | .         | 100,000   | .         | 110,000 | 110,000 |
| Hoover Institution on War, Revolution and Peace | The William H. Donner Foundation               | 50,000  | 50,000  | 70,902    | 60,000    | 75,000    | .         | .       | .       |
| Hoover Institution on War, Revolution and Peace | Timken Foundation of Canton                    | .       | .       | .         | .         | .         | 50,000    | 200,000 | 150,000 |
| Hoover Institution on War, Revolution and Peace | Walton Family Foundation, Inc.                 | .       | .       | 1,355,627 | 927,338   | 1,540,242 | 10,000    | .       | .       |
| Hoover Institution on War, Revolution and Peace | William E. Simon Foundation, Inc.              | 60,000  | 60,000  | 60,000    | .         | .         | 250,000   | .       | 250,000 |
| Hoover Institution on War, Revolution and Peace | William K. Bowes, Jr. Foundation               | 200,000 | .       | .         | .         | .         | 200,000   | .       | .       |
| Hudson Institute                                | Bialkin Family Foundation                      | .       | .       | .         | .         | .         | .         | .       | 5,000   |
| Hudson Institute                                | Bill & Melinda Gates Foundation                | .       | .       | 15,000    | .         | 400,000   | .         | 399,649 | .       |
| Hudson Institute                                | Carnegie Corporation of New York               | 25,000  | .       | .         | .         | .         | .         | 200,000 | .       |
| Hudson Institute                                | Coors Affiliated Foundations                   | 30,000  | .       | .         | 30,000    | .         | 30,000    | .       | .       |
| Hudson Institute                                | Donors Trust/Donors Capital Fund               | .       | 555,000 | 400,000   | 415,000   | 15,000    | 2,030,000 | 10,000  | 62,000  |
| Hudson Institute                                | Earhart Foundation                             | .       | .       | .         | 20,000    | .         | 20,000    | 15,000  | 20,000  |
| Hudson Institute                                | Eli Lilly and Company Foundation               | 15,000  | .       | .         | .         | .         | .         | .       | .       |
| Hudson Institute                                | Ewing Marion Kauffman Foundation               | .       | .       | 250,000   | .         | 250,000   | .         | .       | .       |
| Hudson Institute                                | ExxonMobil Foundation                          | .       | .       | 10,000    | .         | .         | .         | .       | .       |
| Hudson Institute                                | F. M. Kirby Foundation, Inc.                   | 17,500  | 17,500  | 20,000    | 20,000    | 22,500    | 22,500    | 22,500  | 25,000  |



| Recipient              | Foundation                                        | 2003    | 2004    | 2005    | 2006    | 2007    | 2008      | 2009    | 2010    |
|------------------------|---------------------------------------------------|---------|---------|---------|---------|---------|-----------|---------|---------|
| Hudson Institute       | Foundation to Promote Open Society                | .       | .       | .       | .       | .       | .         | 92,500  | 125,000 |
| Hudson Institute       | H. Smith Richardson Charitable Trust              | .       | .       | 100,000 | 400,000 | 125,000 | .         | .       | 150,000 |
| Hudson Institute       | Henry R. Kravis Foundation, Inc.                  | 75,000  | 50,000  | .       | .       | 100,000 | 150,000   | 50,000  | 50,000  |
| Hudson Institute       | John Templeton Foundation                         | .       | .       | .       | 300,000 | 245,000 | 143,750   | 162,500 | 483,750 |
| Hudson Institute       | John William Pope Foundation                      | .       | 1,000   | 1,000   | .       | .       | .         | .       | .       |
| Hudson Institute       | Lilly Endowment Inc.                              | 650,000 | .       | .       | .       | .       | .         | .       | .       |
| Hudson Institute       | Robert & Ardis James Foundation                   | .       | .       | .       | .       | .       | .         | 30,000  | 54,000  |
| Hudson Institute       | Scaife Affiliated Foundations                     | 175,000 | 150,000 | 200,000 | 200,000 | 340,000 | 340,000   | 140,000 | 240,000 |
| Hudson Institute       | Searle Freedom Trust                              | .       | .       | 75,000  | .       | 75,000  | .         | 75,000  | .       |
| Hudson Institute       | Smith Richardson Foundation, Inc.                 | 25,000  | 473,800 | 550,000 | 773,100 | 195,750 | 1,325,000 | 39,820  | 517,500 |
| Hudson Institute       | Sweetfeet Foundation, Inc.                        | .       | .       | 360,000 | .       | .       | .         | .       | .       |
| Hudson Institute       | The Abstraction Fund                              | .       | .       | .       | .       | .       | .         | 155,000 | 151,325 |
| Hudson Institute       | The Achelis Foundation                            | .       | .       | 15,000  | .       | 25,000  | .         | .       | .       |
| Hudson Institute       | The Armstrong Foundation                          | 5,000   | .       | .       | .       | .       | .         | .       | .       |
| Hudson Institute       | The Bodman Foundation                             | .       | .       | .       | 15,000  | 75,000  | .         | 50,000  | 50,000  |
| Hudson Institute       | The Bristol-Myers Squibb Foundation, Inc.         | .       | .       | .       | .       | .       | .         | 25,000  | .       |
| Hudson Institute       | The Capital Group Companies Charitable Foundation | 115,000 | 115,800 | 76,800  | 98,600  | 46,200  | .         | 10,000  | 5,000   |
| Hudson Institute       | The Chisholm Foundation                           | .       | .       | .       | .       | .       | .         | 25,000  | 25,000  |
| Hudson Institute       | The Jean I. & Charles H. Brunie Foundation        | .       | 50,000  | 10,000  | 122,890 | 16,400  | 91,800    | .       | .       |
| Hudson Institute       | The John D. and Catherine T. MacArthur Foundation | .       | .       | .       | .       | 600,000 | .         | .       | 525,000 |
| Hudson Institute       | The Lynde and Harry Bradley Foundation, Inc.      | 446,100 | 589,100 | 665,000 | 820,000 | 990,000 | 1,015,000 | 905,000 | 965,000 |
| Hudson Institute       | The Marcus Foundation, Inc.                       | .       | .       | .       | .       | 85,000  | 85,000    | .       | .       |
| Hudson Institute       | The Paul Singer Family Foundation                 | 25,000  | .       | .       | .       | .       | .         | .       | .       |
| Hudson Institute       | The Pew Charitable Trusts                         | .       | .       | .       | 650,000 | .       | .         | .       | .       |
| Hudson Institute       | The Robert Wood Johnson Foundation                | .       | .       | .       | .       | .       | .         | .       | 399,900 |
| Hudson Institute       | The Starr Foundation                              | .       | .       | .       | .       | .       | .         | .       | 10,000  |
| Hudson Institute       | The UPS Foundation                                | 25,000  | .       | .       | .       | .       | .         | .       | .       |
| Hudson Institute       | The William H. Donner Foundation                  | 50,000  | 75,000  | 25,000  | 50,000  | 115,000 | 75,000    | 40,000  | 50,000  |
| Hudson Institute       | Walton Family Foundation, Inc.                    | 25,000  | 25,000  | .       | .       | .       | .         | .       | .       |
| Hudson Institute       | William E. Simon Foundation, Inc.                 | .       | .       | .       | .       | 25,000  | 20,000    | .       | .       |
| Independence Institute | Coors Affiliated Foundations                      | 50,000  | 60,000  | .       | 60,000  | 60,000  | 60,000    | 60,000  | 50,000  |
| Independence Institute | Daniels Fund                                      | .       | 75,000  | .       | 55,000  | .       | 175,000   | .       | 50,000  |
| Independence Institute | Donors Trust/Donors Capital Fund                  | .       | .       | 200,000 | .       | 50,000  | 285,000   | 485,000 | 291,000 |

| Recipient              | Foundation                                   | 2003    | 2004    | 2005    | 2006    | 2007    | 2008    | 2009    | 2010    |
|------------------------|----------------------------------------------|---------|---------|---------|---------|---------|---------|---------|---------|
| Independence Institute | Eli Lilly and Company Foundation             | .       | .       | 5,000   | 2,500   | .       | .       | .       | .       |
| Independence Institute | Jaquelin Hume Foundation                     | 50,000  | 81,250  | .       | 73,309  | 50,000  | 50,000  | 50,000  | 50,000  |
| Independence Institute | Koch Affiliated Foundations                  | 6,000   | .       | 66,661  | 18,339  | .       | .       | .       | .       |
| Independence Institute | The Anschutz Foundation                      | 35,000  | 1,000   | 25,000  | 50,000  | 40,000  | 25,000  | 85,000  | .       |
| Independence Institute | The Jeld-Wen Foundation                      | 5,000   | .       | 5,000   | .       | .       | .       | .       | .       |
| Independence Institute | The JM Foundation                            | .       | .       | .       | .       | .       | .       | 20,000  | .       |
| Independence Institute | The Lynde and Harry Bradley Foundation, Inc. | .       | 75,000  | 75,000  | 50,000  | 175,000 | 100,000 | 50,000  | 150,000 |
| Independence Institute | The Roe Foundation                           | 20,000  | .       | 25,000  | 25,000  | 25,000  | .       | 30,000  | 25,000  |
| Independence Institute | The William H. Donner Foundation             | 39,905  | 58,000  | 25,000  | 20,000  | 25,000  | 30,000  | 25,000  | 20,000  |
| Independent Institute  | Charles and Ann Johnson Foundation           | .       | .       | .       | .       | .       | 1,000   | .       | 1,000   |
| Independent Institute  | Chase Foundation of Virginia                 | .       | .       | 5,000   | 5,000   | 8,000   | 8,000   | 8,000   | 8,000   |
| Independent Institute  | Communities Foundation of Texas, Inc.        | .       | .       | .       | .       | 24,750  | .       | .       | .       |
| Independent Institute  | Coors Affiliated Foundations                 | .       | .       | 50,000  | .       | 50,000  | .       | .       | .       |
| Independent Institute  | David J. & Mary L. G. Theroux Foundation     | 200,000 | 320,000 | 250,000 | 260,000 | 270,000 | .       | 225,819 | 199,914 |
| Independent Institute  | Dodge Jones Foundation                       | .       | .       | .       | .       | .       | .       | .       | 2,500   |
| Independent Institute  | Donors Trust/Donors Capital Fund             | .       | .       | .       | .       | .       | 5,000   | .       | 1,500   |
| Independent Institute  | Earhart Foundation                           | 12,000  | 15,000  | 35,000  | 15,000  | .       | .       | .       | .       |
| Independent Institute  | Ed Foundation                                | .       | .       | .       | 5,000   | .       | .       | .       | .       |
| Independent Institute  | ExxonMobil Foundation                        | 10,000  | .       | 30,000  | .       | .       | .       | .       | .       |
| Independent Institute  | Galashiels Fund, Ltd.                        | .       | 6,000   | .       | 7,000   | .       | .       | .       | .       |
| Independent Institute  | General Motors Foundation, Inc.              | 10,000  | .       | 7,500   | .       | 7,500   | .       | .       | .       |
| Independent Institute  | Hilton Family Foundation                     | .       | .       | .       | 5,000   | .       | .       | 5,000   | .       |
| Independent Institute  | John Templeton Foundation                    | .       | .       | 500,000 | 306,000 | 115,680 | 106,680 | 76,180  | .       |
| Independent Institute  | K. C. Ames Foundation                        | .       | 10,000  | .       | .       | .       | .       | .       | .       |
| Independent Institute  | Koret Foundation                             | 15,000  | .       | 15,000  | 15,000  | .       | 40,000  | 6,000   | 32,000  |
| Independent Institute  | Pierre F. and Enid Goodrich Foundation       | .       | .       | .       | 25,000  | 20,000  | 20,000  | 20,000  | 15,000  |
| Independent Institute  | Robert & Ardis James Foundation              | .       | .       | .       | .       | .       | .       | .       | 100     |
| Independent Institute  | Susquehanna Foundation                       | .       | .       | 1,000   | 1,000   | .       | .       | 1,000   | .       |
| Independent Institute  | The Ambrose Monell Foundation                | .       | .       | 10,000  | 10,000  | 10,000  | 10,000  | 10,000  | .       |
| Independent Institute  | The Anschutz Foundation                      | .       | .       | .       | 10,000  | .       | .       | .       | .       |
| Independent Institute  | The Armstrong Foundation                     | 5,000   | .       | .       | .       | 5,000   | .       | 10,000  | 2,500   |
| Independent Institute  | The Jeld-Wen Foundation                      | 10,000  | .       | .       | .       | .       | .       | .       | .       |
| Independent Institute  | The JM Foundation                            | .       | .       | 20,000  | .       | .       | .       | .       | .       |

| Recipient                                    | Foundation                                   | 2003      | 2004    | 2005    | 2006    | 2007    | 2008    | 2009      | 2010    |
|----------------------------------------------|----------------------------------------------|-----------|---------|---------|---------|---------|---------|-----------|---------|
| Independent Institute                        | The Rodney Fund                              | 2,000     | 2,000   | 19,000  | 43,925  | .       | 43,000  | 40,000    | .       |
| Independent Institute                        | The San Francisco Foundation                 | 10,000    | .       | 10,000  | .       | 11,000  | .       | 3,000     | .       |
| Independent Institute                        | Vanguard Charitable Endowment Program        | .         | 500     | 3,000   | 3,500   | 4,500   | .       | 6,500     | .       |
| Independent Institute                        | William E. Simon Foundation, Inc.            | 50,000    | .       | .       | .       | .       | .       | .         | .       |
| Independent Institute                        | William K. Bowes, Jr. Foundation             | .         | 110,000 | 210,000 | 200,000 | 200,000 | 225,000 | 200,000   | .       |
| Independent Petroleum Association of America | American Petroleum Institute                 | .         | .       | .       | .       | .       | 27,356  | 60,000    | 100,000 |
| Independent Womens Forum                     | Brady Education Foundation, Inc.             | 1,029,000 | .       | .       | .       | .       | .       | .         | .       |
| Independent Womens Forum                     | Chase Foundation of Virginia                 | .         | .       | .       | .       | .       | .       | 2,000     | 2,000   |
| Independent Womens Forum                     | Coors Affiliated Foundations                 | .         | 75,000  | .       | 50,000  | .       | .       | 50,000    | .       |
| Independent Womens Forum                     | Donors Trust/Donors Capital Fund             | .         | 100     | .       | 5,000   | .       | 35,000  | 3,020,000 | 12,250  |
| Independent Womens Forum                     | Earhart Foundation                           | .         | 15,000  | .       | .       | .       | .       | .         | .       |
| Independent Womens Forum                     | ExxonMobil Foundation                        | 15,000    | .       | 15,000  | .       | .       | .       | .         | .       |
| Independent Womens Forum                     | Gilder Foundation, Inc.                      | 50,000    | .       | .       | .       | .       | .       | .         | .       |
| Independent Womens Forum                     | H. Smith Richardson Charitable Trust         | 150,000   | .       | .       | .       | .       | .       | .         | .       |
| Independent Womens Forum                     | Iowa West Foundation                         | .         | 500,000 | .       | .       | .       | .       | .         | .       |
| Independent Womens Forum                     | Jaquelin Hume Foundation                     | 35,000    | 35,000  | .       | 35,000  | 25,000  | 35,000  | 15,000    | .       |
| Independent Womens Forum                     | John William Pope Foundation                 | .         | .       | .       | .       | .       | .       | 20,000    | 10,000  |
| Independent Womens Forum                     | Koch Affiliated Foundations                  | .         | .       | 25,000  | 15,000  | 250,000 | .       | 150,000   | 350,000 |
| Independent Womens Forum                     | Koret Foundation                             | .         | .       | .       | .       | 3,000   | .       | .         | .       |
| Independent Womens Forum                     | Scaife Affiliated Foundations                | 175,000   | 150,000 | 150,000 | 125,000 | 100,000 | 100,000 | .         | .       |
| Independent Womens Forum                     | Searle Freedom Trust                         | 50,000    | .       | .       | .       | 50,000  | 75,000  | .         | .       |
| Independent Womens Forum                     | Susquehanna Foundation                       | .         | .       | 1,000   | .       | .       | .       | .         | .       |
| Independent Womens Forum                     | The Anschutz Foundation                      | .         | 10,000  | 7,500   | 5,000   | .       | 10,000  | 25,000    | .       |
| Independent Womens Forum                     | The Armstrong Foundation                     | .         | .       | .       | 5,000   | .       | .       | .         | .       |
| Independent Womens Forum                     | The Bodman Foundation                        | .         | .       | 25,000  | .       | .       | .       | .         | .       |
| Independent Womens Forum                     | The Grover Hermann Foundation                | .         | .       | 10,000  | 10,000  | 10,000  | .       | .         | .       |
| Independent Womens Forum                     | The Lynde and Harry Bradley Foundation, Inc. | 20,000    | 25,000  | 25,000  | 35,000  | 30,000  | 25,000  | .         | .       |
| Independent Womens Forum                     | The Roe Foundation                           | 5,000     | .       | 5,000   | .       | .       | .       | .         | .       |
| Independent Womens Forum                     | The William H. Donner Foundation             | 10,000    | .       | 25,000  | 25,000  | 28,157  | 15,000  | 40,000    | .       |
| Independent Womens Forum                     | William E. Simon Foundation, Inc.            | .         | .       | .       | .       | .       | 10,000  | .         | .       |
| Institute for Energy Research                | American Petroleum Institute                 | .         | .       | .       | .       | .       | 60,000  | 50,000    | 50,000  |
| Institute for Energy Research                | Chase Foundation of Virginia                 | .         | .       | .       | .       | .       | .       | .         | 5,000   |
| Institute for Energy Research                | Donors Trust/Donors Capital Fund             | .         | .       | .       | .       | 65,000  | 300,000 | .         | 350,000 |

| Recipient                                         | Foundation                                              | 2003   | 2004   | 2005    | 2006    | 2007    | 2008    | 2009    | 2010    |
|---------------------------------------------------|---------------------------------------------------------|--------|--------|---------|---------|---------|---------|---------|---------|
| Institute for Energy Research                     | Greater Kansas City Community Foundation                | .      | .      | .       | .       | .       | .       | 150,000 | .       |
| Institute for Energy Research                     | Koch Affiliated Foundations                             | 10,000 | .      | .       | .       | .       | .       | .       | .       |
| Institute for Energy Research                     | PacifiCorp Foundation                                   | .      | .      | .       | .       | .       | .       | 250,000 | .       |
| Institute for Energy Research                     | The Challenge Foundation                                | .      | .      | .       | .       | .       | .       | 10,000  | .       |
| Institute for the Study of Earth and Man          | Communities Foundation of Texas, Inc.                   | .      | 25,000 | .       | 25,000  | 50,000  | 25,000  | .       | .       |
| International Policy Network - U.S.               | Donors Trust/Donors Capital Fund                        | .      | 17,820 | .       | 27,500  | 15,000  | 40,000  | 46,500  | 449,850 |
| International Policy Network - U.S.               | Earhart Foundation                                      | .      | .      | 33,000  | .       | 7,500   | 25,000  | .       | .       |
| International Policy Network - U.S.               | Eli Lilly and Company Foundation                        | .      | 25,000 | 15,000  | .       | .       | .       | .       | .       |
| International Policy Network - U.S.               | ExxonMobil Foundation                                   | 50,000 | .      | .       | .       | .       | .       | .       | .       |
| International Policy Network - U.S.               | Gilder Foundation, Inc.                                 | 10,000 | .      | .       | .       | .       | .       | .       | .       |
| International Policy Network - U.S.               | Koch Affiliated Foundations                             | .      | .      | 25,000  | .       | .       | .       | .       | .       |
| International Policy Network - U.S.               | Pierre F. and Enid Goodrich Foundation                  | .      | .      | .       | 41,000  | .       | .       | .       | .       |
| International Policy Network - U.S.               | Scaife Affiliated Foundations                           | .      | .      | 50,000  | .       | 50,000  | 75,000  | 50,000  | 50,000  |
| International Policy Network - U.S.               | The Jean I. & Charles H. Brunie Foundation              | .      | 5,000  | 1,000   | .       | .       | .       | .       | .       |
| James Madison Institute for Public Policy Studies | American Petroleum Institute                            | .      | .      | .       | .       | .       | 30,000  | 30,000  | .       |
| James Madison Institute for Public Policy Studies | Chase Foundation of Virginia                            | .      | .      | .       | .       | 2,000   | .       | .       | 2,000   |
| James Madison Institute for Public Policy Studies | Coors Affiliated Foundations                            | .      | .      | .       | .       | .       | .       | 25,000  | 25,000  |
| James Madison Institute for Public Policy Studies | Daniels Fund                                            | .      | .      | .       | .       | .       | 25,000  | .       | .       |
| James Madison Institute for Public Policy Studies | Donors Trust/Donors Capital Fund                        | .      | .      | 150,000 | 500     | 141,000 | 137,000 | 158,000 | 183,500 |
| James Madison Institute for Public Policy Studies | Dunn's Foundation for the Advancement of Right Thinking | 20,000 | 25,000 | .       | 35,000  | 10,000  | 10,000  | 30,000  | 40,000  |
| James Madison Institute for Public Policy Studies | Hilton Family Foundation                                | 35,000 | 40,000 | .       | 15,000  | 15,000  | .       | .       | 500,000 |
| James Madison Institute for Public Policy Studies | Jaquelin Hume Foundation                                | .      | .      | .       | .       | 31,850  | 41,462  | 44,667  | .       |
| James Madison Institute for Public Policy Studies | Koch Affiliated Foundations                             | .      | .      | .       | .       | .       | 39,462  | .       | 7,500   |
| James Madison Institute for Public Policy Studies | Lillian S. Wells Foundation, Inc.                       | .      | .      | .       | .       | 35,000  | .       | 55,000  | 55,000  |
| James Madison Institute for Public Policy Studies | Lovett & Ruth Peters Foundation                         | .      | .      | .       | .       | 5,100   | .       | .       | .       |
| James Madison Institute for Public Policy Studies | The JM Foundation                                       | .      | .      | 20,000  | .       | .       | .       | 25,000  | .       |
| James Madison Institute for Public Policy Studies | The Lynde and Harry Bradley Foundation, Inc.            | .      | .      | .       | .       | .       | 15,000  | .       | .       |
| James Madison Institute for Public Policy Studies | The Roe Foundation                                      | 20,000 | .      | .       | 25,000  | 30,000  | .       | 30,000  | 25,000  |
| John Locke Foundation                             | Chase Foundation of Virginia                            | 10,000 | 10,980 | 10,000  | 12,000  | 10,000  | 10,000  | 10,000  | 10,000  |
| John Locke Foundation                             | Donors Trust/Donors Capital Fund                        | .      | .      | .       | 150     | 25,000  | 125,000 | 390,600 | 100,000 |
| John Locke Foundation                             | E. A. Morris Charitable Foundation                      | 50,000 | 55,000 | 100,000 | 150,000 | .       | .       | .       | .       |
| John Locke Foundation                             | Earhart Foundation                                      | .      | .      | .       | .       | 11,500  | .       | .       | .       |
| John Locke Foundation                             | Jaquelin Hume Foundation                                | 25,000 | 30,000 | .       | 30,000  | 25,000  | 25,000  | 15,000  | .       |

| Recipient                               | Foundation                                              | 2003      | 2004      | 2005      | 2006      | 2007      | 2008      | 2009      | 2010      |
|-----------------------------------------|---------------------------------------------------------|-----------|-----------|-----------|-----------|-----------|-----------|-----------|-----------|
| John Locke Foundation                   | John William Pope Foundation                            | 1,503,714 | 1,503,727 | 1,695,619 | 2,625,807 | 2,599,508 | 2,599,508 | 1,339,754 | 2,614,508 |
| John Locke Foundation                   | Koch Affiliated Foundations                             | 5,000     | 50,000    | 10,000    | .         | .         | .         | 37,472    | .         |
| John Locke Foundation                   | Searle Freedom Trust                                    | .         | .         | .         | .         | .         | 30,000    | .         | .         |
| John Locke Foundation                   | The JM Foundation                                       | .         | .         | .         | .         | .         | .         | 25,000    | .         |
| John Locke Foundation                   | The Roe Foundation                                      | 20,000    | .         | 25,000    | 25,000    | 25,000    | .         | 25,000    | .         |
| Landmark Legal Foundation               | Aequus Institute                                        | 2,500     | 1,000     | 2,000     | 2,500     | 2,500     | 2,500     | 1,000     | 1,000     |
| Landmark Legal Foundation               | Chase Foundation of Virginia                            | 5,000     | .         | 5,000     | 5,000     | 5,000     | 4,000     | 4,000     | 4,000     |
| Landmark Legal Foundation               | Coors Affiliated Foundations                            | 55,000    | 60,000    | 60,000    | 60,000    | 60,000    | 60,000    | 60,000    | .         |
| Landmark Legal Foundation               | Donors Trust/Donors Capital Fund                        | .         | 300       | .         | 100       | 100       | 5,000     | .         | 42,750    |
| Landmark Legal Foundation               | Dunn's Foundation for the Advancement of Right Thinking | 370,000   | 350,000   | 350,000   | 260,000   | 120,000   | 120,000   | 200,000   | 100,000   |
| Landmark Legal Foundation               | ExxonMobil Foundation                                   | 10,000    | 10,000    | 10,000    | 10,000    | 10,000    | .         | .         | .         |
| Landmark Legal Foundation               | F. M. Kirby Foundation, Inc.                            | 45,000    | 45,000    | 45,000    | 45,000    | 45,000    | 45,000    | 5,000     | 25,000    |
| Landmark Legal Foundation               | Gilder Foundation, Inc.                                 | .         | 5,000     | 5,000     | .         | .         | .         | .         | .         |
| Landmark Legal Foundation               | J. P. Humphreys Foundation                              | .         | .         | .         | .         | 10,000    | .         | .         | .         |
| Landmark Legal Foundation               | Jaquelin Hume Foundation                                | .         | .         | 150,000   | 150,000   | 50,000    | .         | .         | .         |
| Landmark Legal Foundation               | Lovett & Ruth Peters Foundation                         | .         | .         | .         | .         | .         | 50,000    | 50,000    | .         |
| Landmark Legal Foundation               | Scaife Affiliated Foundations                           | 250,000   | 500,000   | 500,000   | 450,000   | 400,000   | 400,000   | 300,000   | 250,000   |
| Landmark Legal Foundation               | The Anschutz Foundation                                 | 15,000    | 10,000    | 15,000    | 15,000    | 15,000    | 20,000    | 20,000    | .         |
| Landmark Legal Foundation               | The Armstrong Foundation                                | 15,000    | .         | 15,000    | 15,000    | 30,000    | 15,000    | 20,000    | 40,000    |
| Landmark Legal Foundation               | The E. L. Craig Foundation                              | 25,000    | 25,000    | 25,000    | 25,000    | .         | .         | .         | .         |
| Landmark Legal Foundation               | The Jeld-Wen Foundation                                 | 10,000    | 10,000    | 10,000    | .         | .         | .         | .         | .         |
| Landmark Legal Foundation               | The Lynde and Harry Bradley Foundation, Inc.            | 20,000    | 20,000    | 70,000    | 35,000    | 60,000    | .         | 5,000     | 5,000     |
| Landmark Legal Foundation               | The Marcus Foundation, Inc.                             | 1,000     | .         | .         | .         | .         | .         | .         | .         |
| Landmark Legal Foundation               | The Roe Foundation                                      | 2,500     | .         | .         | .         | .         | .         | .         | .         |
| Landmark Legal Foundation               | The William H. Donner Foundation                        | .         | 50,000    | 45,000    | .         | .         | .         | .         | .         |
| Manhattan Institute for Policy Research | Assurant Health Foundation                              | .         | .         | .         | 50,000    | .         | .         | .         | .         |
| Manhattan Institute for Policy Research | Bialkin Family Foundation                               | .         | 10,000    | 10,000    | 10,000    | 20,000    | 1,221,660 | .         | 15,000    |
| Manhattan Institute for Policy Research | Bill & Melinda Gates Foundation                         | 96,000    | 115,000   | 92,575    | .         | .         | .         | .         | .         |
| Manhattan Institute for Policy Research | Brady Education Foundation, Inc.                        | 800,000   | .         | .         | .         | .         | .         | .         | .         |
| Manhattan Institute for Policy Research | Carnegie Corporation of New York                        | .         | .         | 50,000    | .         | 200,000   | .         | .         | .         |
| Manhattan Institute for Policy Research | Charles and Ann Johnson Foundation                      | .         | .         | .         | .         | .         | 1,000     | .         | 2,000     |
| Manhattan Institute for Policy Research | Chase Foundation of Virginia                            | 13,000    | 12,200    | 10,000    | 10,000    | .         | .         | .         | .         |
| Manhattan Institute for Policy Research | Coors Affiliated Foundations                            | .         | 35,000    | .         | .         | 35,000    | .         | .         | 25,000    |

| Recipient                               | Foundation                                      | 2003    | 2004    | 2005    | 2006    | 2007    | 2008    | 2009    | 2010    |
|-----------------------------------------|-------------------------------------------------|---------|---------|---------|---------|---------|---------|---------|---------|
| Manhattan Institute for Policy Research | Dodge Jones Foundation                          | .       | .       | 10,000  | 10,000  | .       | .       | .       | 5,000   |
| Manhattan Institute for Policy Research | Donors Trust/Donors Capital Fund                | .       | 71,000  | 50,000  | 74,500  | 114,500 | 153,295 | 281,475 | 232,000 |
| Manhattan Institute for Policy Research | Earhart Foundation                              | 60,000  | 45,000  | 75,000  | 50,000  | .       | 20,000  | 25,000  | .       |
| Manhattan Institute for Policy Research | Eli Lilly and Company Foundation                | 15,000  | 30,000  | 30,000  | 10,000  | 10,000  | .       | .       | .       |
| Manhattan Institute for Policy Research | Ewing Marion Kauffman Foundation                | .       | .       | 634,750 | .       | 500,000 | .       | 300,000 | .       |
| Manhattan Institute for Policy Research | ExxonMobil Foundation                           | 25,000  | .       | .       | .       | .       | .       | .       | .       |
| Manhattan Institute for Policy Research | F. M. Kirby Foundation, Inc.                    | 30,000  | 37,500  | 37,500  | 37,500  | 250,000 | 75,000  | 75,000  | 75,000  |
| Manhattan Institute for Policy Research | Gilder Foundation, Inc.                         | .       | .       | .       | 50,000  | 60,000  | 60,000  | 10,000  | 60,000  |
| Manhattan Institute for Policy Research | H. Smith Richardson Charitable Trust            | .       | .       | .       | 159,115 | .       | .       | .       | .       |
| Manhattan Institute for Policy Research | Henry R. Kravis Foundation, Inc.                | .       | 10,000  | .       | .       | .       | .       | .       | .       |
| Manhattan Institute for Policy Research | J. P. Humphreys Foundation                      | 25,000  | .       | .       | .       | .       | .       | .       | .       |
| Manhattan Institute for Policy Research | Jaquelin Hume Foundation                        | 100,000 | .       | 100,000 | 100,000 | 50,000  | 50,000  | 50,000  | 50,000  |
| Manhattan Institute for Policy Research | John S. and James L. Knight Foundation          | .       | .       | 100,000 | .       | .       | .       | .       | .       |
| Manhattan Institute for Policy Research | John Templeton Foundation                       | .       | 600,000 | 80,000  | 444,000 | 60,000  | .       | 15,000  | .       |
| Manhattan Institute for Policy Research | John William Pope Foundation                    | .       | .       | .       | 10,000  | 10,000  | 10,000  | 10,000  | .       |
| Manhattan Institute for Policy Research | K. C. Ames Foundation                           | .       | 20,000  | .       | .       | .       | .       | .       | .       |
| Manhattan Institute for Policy Research | Koch Affiliated Foundations                     | 200,000 | 200,000 | 200,000 | 200,000 | 200,000 | 200,000 | 200,000 | 200,000 |
| Manhattan Institute for Policy Research | Lilly Endowment Inc.                            | 200,000 | 200,000 | 200,000 | 200,000 | 200,000 | 200,000 | 200,000 | 200,000 |
| Manhattan Institute for Policy Research | Lovett & Ruth Peters Foundation                 | .       | .       | .       | .       | .       | .       | .       | 10,000  |
| Manhattan Institute for Policy Research | Mercer Family Foundation                        | .       | .       | .       | .       | .       | .       | 50,000  | .       |
| Manhattan Institute for Policy Research | Robert & Ardis James Foundation                 | .       | 2,000   | 156,000 | 100,000 | 200,000 | 200,000 | 200,000 | 250,000 |
| Manhattan Institute for Policy Research | Scaife Affiliated Foundations                   | 180,000 | 190,000 | 240,000 | 240,000 | 240,000 | 200,000 | 150,000 | 150,000 |
| Manhattan Institute for Policy Research | Searle Freedom Trust                            | 100,000 | 100,000 | .       | 300,000 | 436,000 | 450,000 | 450,000 | 450,000 |
| Manhattan Institute for Policy Research | Smith Richardson Foundation, Inc.               | .       | 84,000  | 327,467 | 174,115 | 348,304 | 69,014  | 352,500 | 75,000  |
| Manhattan Institute for Policy Research | Susquehanna Foundation                          | .       | 977     | .       | .       | .       | .       | .       | .       |
| Manhattan Institute for Policy Research | The Abstraction Fund                            | .       | .       | .       | .       | .       | .       | 51,000  | 25,000  |
| Manhattan Institute for Policy Research | The Achelis Foundation                          | 65,000  | 15,000  | 100,000 | 75,000  | 35,000  | .       | .       | .       |
| Manhattan Institute for Policy Research | The Alice M. & Thomas J. Tisch Foundation, Inc. | .       | 125,000 | 233,200 | 175,000 | .       | 175,000 | 22,850  | .       |
| Manhattan Institute for Policy Research | The Ambrose Monell Foundation                   | 25,000  | 25,000  | 25,000  | 50,000  | 50,000  | 50,000  | 50,000  | 50,000  |
| Manhattan Institute for Policy Research | The Andrew Cader Foundation, Inc.               | .       | .       | 200,000 | 125,000 | 25,000  | 125,000 | 100,000 | 100,000 |
| Manhattan Institute for Policy Research | The Anschutz Foundation                         | 100,000 | 50,000  | 50,000  | 100,000 | 50,000  | 75,000  | 75,000  | .       |
| Manhattan Institute for Policy Research | The Armstrong Foundation                        | 5,000   | .       | .       | 5,000   | 10,000  | .       | 5,000   | 5,000   |
| Manhattan Institute for Policy Research | The Bodman Foundation                           | 100,000 | 35,000  | 165,000 | 100,000 | 125,000 | 75,000  | 40,000  | 50,000  |

| Recipient                               | Foundation                                   | 2003    | 2004    | 2005    | 2006    | 2007    | 2008    | 2009    | 2010    |
|-----------------------------------------|----------------------------------------------|---------|---------|---------|---------|---------|---------|---------|---------|
| Manhattan Institute for Policy Research | The Bristol-Myers Squibb Foundation, Inc.    | 15,000  | 20,000  | 20,000  | 20,000  | .       | 20,000  | .       | .       |
| Manhattan Institute for Policy Research | The Carson Family Charitable Trust           | 10,000  | 25,000  | 25,000  | 25,000  | 25,000  | 25,000  | .       | .       |
| Manhattan Institute for Policy Research | The Challenge Foundation                     | .       | .       | .       | .       | .       | 10,000  | 5,000   | 5,000   |
| Manhattan Institute for Policy Research | The Chisholm Foundation                      | 85,000  | 85,000  | 85,000  | 85,000  | .       | .       | 85,000  | 90,000  |
| Manhattan Institute for Policy Research | The Chrysler Foundation                      | .       | 100,000 | 50,000  | .       | 25,000  | .       | .       | .       |
| Manhattan Institute for Policy Research | The J. M. Kaplan Fund, Inc.                  | 125,000 | 150,000 | 225,000 | 100,000 | 100,000 | 100,000 | 100,000 | .       |
| Manhattan Institute for Policy Research | The Jean I. & Charles H. Brunie Foundation   | 35,000  | 50,000  | .       | 23,200  | 25,000  | .       | .       | .       |
| Manhattan Institute for Policy Research | The JM Foundation                            | .       | .       | 35,000  | .       | .       | 40,000  | .       | 50,000  |
| Manhattan Institute for Policy Research | The Kern Family Foundation, Inc.             | 75,000  | .       | 150,000 | .       | .       | .       | .       | .       |
| Manhattan Institute for Policy Research | The Lynde and Harry Bradley Foundation, Inc. | 250,000 | 365,000 | 320,000 | 295,000 | 345,000 | 330,000 | 330,000 | 435,000 |
| Manhattan Institute for Policy Research | The Marcus Foundation, Inc.                  | .       | .       | 1,000   | 1,000   | .       | .       | .       | .       |
| Manhattan Institute for Policy Research | The Paul Singer Family Foundation            | 90,000  | 150,000 | .       | .       | .       | .       | 275,000 | .       |
| Manhattan Institute for Policy Research | The Robert Wood Johnson Foundation           | .       | .       | .       | 30,000  | .       | .       | .       | .       |
| Manhattan Institute for Policy Research | The Roe Foundation                           | .       | .       | .       | 10,000  | 15,000  | .       | .       | .       |
| Manhattan Institute for Policy Research | The San Francisco Foundation                 | 10,000  | .       | .       | .       | 10,000  | .       | .       | .       |
| Manhattan Institute for Policy Research | The Starr Foundation                         | .       | 500,000 | .       | 550,000 | 25,000  | 275,000 | 100,000 | 75,000  |
| Manhattan Institute for Policy Research | The TWS Foundation                           | 98,200  | .       | 100,000 | 250,000 | 300,000 | 297,950 | .       | .       |
| Manhattan Institute for Policy Research | The Weismann Foundation                      | .       | .       | .       | .       | 200,339 | .       | 80,000  | .       |
| Manhattan Institute for Policy Research | The William H. Donner Foundation             | 50,000  | 90,000  | 48,000  | 65,000  | 40,000  | 30,000  | 35,000  | 32,500  |
| Manhattan Institute for Policy Research | Vanguard Charitable Endowment Program        | 2,000   | 45,640  | .       | 126,000 | 117,500 | 10,500  | 21,500  | 28,900  |
| Manhattan Institute for Policy Research | Walton Family Foundation, Inc.               | 75,000  | 95,000  | .       | .       | .       | .       | 150,525 | .       |
| Manhattan Institute for Policy Research | William E. Simon Foundation, Inc.            | 95,000  | 50,000  | 55,000  | 406,200 | 352,500 | 382,500 | 310,000 | 395,000 |
| Media Research Center                   | Charles and Ann Johnson Foundation           | 25,256  | .       | 30,000  | .       | 25,000  | 1,000   | 30,000  | 30,000  |
| Media Research Center                   | Communities Foundation of Texas, Inc.        | 25,000  | 45,500  | 46,000  | 50,000  | 75,000  | 50,000  | 25,500  | .       |
| Media Research Center                   | Coors Affiliated Foundations                 | 50,000  | .       | 50,000  | .       | .       | 50,000  | .       | .       |
| Media Research Center                   | Covenant Foundation, Inc.                    | 20,000  | 20,000  | .       | 20,000  | 20,000  | 20,000  | .       | .       |
| Media Research Center                   | Dodge Jones Foundation                       | 25,000  | 10,000  | 10,000  | 10,000  | 10,000  | .       | .       | 15,000  |
| Media Research Center                   | Donors Trust/Donors Capital Fund             | 5,000   | 16,500  | 9,020   | 24,300  | 12,700  | 40,000  | 325,000 | 328,500 |
| Media Research Center                   | Dorothy D. and Joseph A. Moller Foundation   | 10,000  | 40,000  | .       | .       | 15,000  | 72,000  | 61,500  | 72,000  |
| Media Research Center                   | Ed Uihlein Family Foundation                 | .       | .       | .       | .       | .       | .       | 250,000 | 300,000 |
| Media Research Center                   | ExxonMobil Foundation                        | 50,000  | 50,000  | 50,000  | 52,500  | .       | .       | .       | .       |
| Media Research Center                   | F. M. Kirby Foundation, Inc.                 | 35,000  | 35,000  | 35,000  | 35,000  | 40,000  | 40,000  | 35,000  | 40,000  |
| Media Research Center                   | Gilder Foundation, Inc.                      | 1,500   | .       | .       | .       | .       | .       | .       | 250     |

| Recipient             | Foundation                                                   | 2003      | 2004    | 2005      | 2006      | 2007      | 2008      | 2009      | 2010      |
|-----------------------|--------------------------------------------------------------|-----------|---------|-----------|-----------|-----------|-----------|-----------|-----------|
| Media Research Center | Hilton Family Foundation                                     | 500       | 500     | .         | 500       | .         | .         | .         | .         |
| Media Research Center | John Templeton Foundation                                    | 50,000    | .       | 50,000    | 1,005,000 | 300,000   | 300,000   | 200,000   | .         |
| Media Research Center | Koch Affiliated Foundations                                  | .         | 975     | .         | .         | .         | .         | .         | .         |
| Media Research Center | Mercer Family Foundation                                     | .         | .       | .         | .         | .         | 500,000   | 1,000,000 | 1,194,000 |
| Media Research Center | Scaife Affiliated Foundations                                | 1,050,000 | .       | .         | 350,000   | 350,000   | 350,000   | 250,000   | 250,000   |
| Media Research Center | The Anschutz Foundation                                      | 10,000    | 15,000  | 10,000    | 10,000    | 15,000    | 20,000    | 20,000    | .         |
| Media Research Center | The Armstrong Foundation                                     | 5,500     | 25,000  | 25,000    | 25,000    | 60,000    | 25,000    | 30,000    | 25,000    |
| Media Research Center | The Community Foundation Serving Richmond & Central Virginia | .         | .       | .         | .         | 1,000     | .         | 2,000     | .         |
| Media Research Center | The Grover Hermann Foundation                                | .         | 5,000   | 5,000     | 5,000     | .         | .         | .         | .         |
| Media Research Center | The Lynde and Harry Bradley Foundation, Inc.                 | 250,000   | 250,000 | 275,000   | 275,000   | 275,000   | 25,000    | 125,000   | 275,000   |
| Media Research Center | The Richard and Helen DeVos Foundation                       | 100,000   | 100,000 | 100,000   | 200,000   | 100,000   | 100,000   | 100,000   | 1,000,000 |
| Media Research Center | The Roe Foundation                                           | 1,000     | .       | 2,500     | .         | .         | .         | .         | .         |
| Media Research Center | The TWS Foundation                                           | 10,000    | .       | 10,000    | 10,000    | 10,000    | .         | .         | .         |
| Media Research Center | The William H. Donner Foundation                             | 15,000    | 57,246  | 10,000    | 20,000    | 20,000    | 10,000    | 2,500     | 10,000    |
| Media Research Center | Vanguard Charitable Endowment Program                        | 55,000    | 47,500  | 48,000    | 68,600    | 69,000    | .         | 59,500    | .         |
| Mercatus Center       | Aequus Institute                                             | 1,000     | 1,000   | .         | .         | .         | .         | .         | .         |
| Mercatus Center       | American Petroleum Institute                                 | .         | .       | .         | .         | .         | 25,000    | .         | .         |
| Mercatus Center       | Charles and Ann Johnson Foundation                           | .         | .       | .         | .         | .         | 1,000     | 10,000    | 10,000    |
| Mercatus Center       | Coors Affiliated Foundations                                 | .         | 30,000  | .         | .         | .         | .         | .         | .         |
| Mercatus Center       | Covenant Foundation, Inc.                                    | 50,000    | 25,000  | .         | 10,000    | 10,000    | .         | .         | .         |
| Mercatus Center       | Dodge Jones Foundation                                       | .         | .       | 10,000    | .         | .         | 10,000    | .         | 2,500     |
| Mercatus Center       | Donors Trust/Donors Capital Fund                             | 1,000     | 1,000   | 1,000     | 104,000   | 260,500   | 156,000   | 106,800   | 1,156,700 |
| Mercatus Center       | Earhart Foundation                                           | .         | .       | .         | .         | 20,000    | .         | .         | .         |
| Mercatus Center       | General Motors Foundation, Inc.                              | 30,000    | 30,000  | 15,000    | 20,000    | 20,000    | 25,000    | .         | .         |
| Mercatus Center       | Hilton Family Foundation                                     | 1,000     | .       | .         | 5,000     | 6,300     | .         | .         | 5,000     |
| Mercatus Center       | J. P. Humphreys Foundation                                   | .         | 20,000  | .         | .         | .         | 25,000    | .         | .         |
| Mercatus Center       | John Templeton Foundation                                    | .         | .       | 500,000   | 250,971   | 50,092    | .         | .         | .         |
| Mercatus Center       | John William Pope Foundation                                 | 25,000    | 25,000  | 50,000    | 50,000    | 50,000    | 50,000    | 50,000    | 25,000    |
| Mercatus Center       | Koch Affiliated Foundations                                  | 27,000    | .       | 1,015,000 | 3,900,000 | 2,682,500 | 1,050,000 | .         | .         |
| Mercatus Center       | Modzelewski Charitable Trust                                 | 20,000    | .       | 15,000    | .         | .         | .         | .         | .         |
| Mercatus Center       | Pierre F. and Enid Goodrich Foundation                       | .         | .       | .         | .         | 20,000    | 20,000    | 20,000    | 15,000    |
| Mercatus Center       | Scaife Affiliated Foundations                                | .         | 80,000  | 80,000    | 80,000    | 80,000    | 80,000    | 50,000    | 50,000    |
| Mercatus Center       | Searle Freedom Trust                                         | .         | 40,000  | .         | 100,000   | 150,000   | 230,000   | 250,000   | 250,000   |



| Recipient                             | Foundation                                              | 2003   | 2004   | 2005   | 2006   | 2007    | 2008      | 2009    | 2010    |
|---------------------------------------|---------------------------------------------------------|--------|--------|--------|--------|---------|-----------|---------|---------|
| Mercatus Center                       | Stephen Bechtel Fund                                    | .      | .      | .      | .      | .       | .         | 50,000  | 200,000 |
| Mercatus Center                       | The Anschutz Foundation                                 | 15,000 | 10,000 | 5,000  | .      | .       | 10,000    | 10,000  | .       |
| Mercatus Center                       | The Armstrong Foundation                                | 20,000 | 20,000 | 20,000 | .      | .       | .         | .       | 10,000  |
| Mercatus Center                       | The Bodman Foundation                                   | .      | .      | .      | .      | .       | .         | .       | .       |
| Mercatus Center                       | The Challenge Foundation                                | .      | .      | .      | .      | .       | .         | .       | 25,000  |
| Mercatus Center                       | The E. L. Craig Foundation                              | .      | .      | 25,000 | .      | .       | .         | .       | .       |
| Mercatus Center                       | The Jeld-Wen Foundation                                 | 10,000 | .      | 10,000 | .      | .       | .         | .       | .       |
| Mercatus Center                       | The JM Foundation                                       | .      | .      | .      | .      | .       | .         | 25,000  | .       |
| Mercatus Center                       | The Lynde and Harry Bradley Foundation, Inc.            | 10,000 | 10,000 | 10,000 | .      | 10,000  | .         | .       | .       |
| Mercatus Center                       | The Rodney Fund                                         | 7,000  | 6,000  | 13,000 | 8,000  | .       | 2,000     | 8,000   | .       |
| Mercatus Center                       | The Roe Foundation                                      | 6,000  | .      | .      | .      | .       | .         | .       | .       |
| Mercatus Center                       | The TWS Foundation                                      | .      | .      | .      | 1,000  | .       | .         | .       | .       |
| Mercatus Center                       | Vanguard Charitable Endowment Program                   | 1,000  | 3,500  | 25,000 | 25,500 | 10,800  | 35,500    | 65,500  | 35,500  |
| Mountain States Legal Foundation      | Coors Affiliated Foundations                            | 75,000 | 75,000 | 75,000 | .      | 75,000  | 75,000    | 75,000  | 60,000  |
| Mountain States Legal Foundation      | Donors Trust/Donors Capital Fund                        | .      | .      | 6,000  | 6,000  | 11,250  | 10,100    | 2,000   | 3,600   |
| Mountain States Legal Foundation      | ExxonMobil Foundation                                   | .      | .      | 2,500  | 2,500  | 5,000   | .         | .       | .       |
| Mountain States Legal Foundation      | Robert & Ardis James Foundation                         | .      | .      | .      | .      | .       | .         | .       | 100     |
| Mountain States Legal Foundation      | Scaife Affiliated Foundations                           | 25,000 | .      | 25,000 | 25,000 | 25,000  | 25,000    | .       | .       |
| Mountain States Legal Foundation      | The Anschutz Foundation                                 | .      | .      | .      | 10,000 | 15,000  | 10,000    | 50,000  | .       |
| Mountain States Legal Foundation      | The Armstrong Foundation                                | 7,500  | .      | .      | .      | 7,500   | .         | 5,000   | 20,000  |
| Mountain States Legal Foundation      | The Lynde and Harry Bradley Foundation, Inc.            | 10,000 | 10,000 | .      | .      | .       | .         | .       | .       |
| Mountain States Legal Foundation      | The Roe Foundation                                      | 1,000  | .      | 1,000  | .      | .       | .         | .       | .       |
| Mountain States Legal Foundation      | Vanguard Charitable Endowment Program                   | .      | 2,500  | 5,000  | 1,000  | 2,000   | 11,000    | 7,000   | 10,300  |
| National Association of Manufacturers | American Petroleum Institute                            | .      | .      | .      | .      | .       | 1,163,650 | .       | .       |
| National Center for Policy Analysis   | Assurant Health Foundation                              | 25,000 | 30,000 | 50,000 | 50,000 | .       | .         | .       | .       |
| National Center for Policy Analysis   | Charles and Ann Johnson Foundation                      | .      | .      | .      | .      | .       | 5,000     | .       | 20,000  |
| National Center for Policy Analysis   | Chase Foundation of Virginia                            | 34,000 | 37,820 | 34,000 | 34,000 | 34,000  | 34,000    | 84,000  | 36,000  |
| National Center for Policy Analysis   | Communities Foundation of Texas, Inc.                   | 36,600 | 94,100 | 98,100 | 85,000 | 60,000  | 256,000   | 150,100 | 13,000  |
| National Center for Policy Analysis   | Coors Affiliated Foundations                            | .      | 35,000 | .      | 40,000 | .       | 40,000    | .       | 25,000  |
| National Center for Policy Analysis   | Dodge Jones Foundation                                  | 10,000 | 50,000 | 50,000 | 50,000 | .       | 11,500    | .       | 15,000  |
| National Center for Policy Analysis   | Donors Trust/Donors Capital Fund                        | .      | 5,250  | .      | 15,000 | 105,650 | 53,000    | 285,000 | 63,000  |
| National Center for Policy Analysis   | Dorothy D. and Joseph A. Moller Foundation              | 5,000  | .      | .      | .      | .       | .         | .       | .       |
| National Center for Policy Analysis   | Dunn's Foundation for the Advancement of Right Thinking | .      | 20,000 | 20,000 | .      | 10,000  | 10,000    | 17,000  | .       |

| Recipient                           | Foundation                                                    | 2003    | 2004    | 2005    | 2006    | 2007    | 2008    | 2009    | 2010    |
|-------------------------------------|---------------------------------------------------------------|---------|---------|---------|---------|---------|---------|---------|---------|
| National Center for Policy Analysis | Earhart Foundation                                            | 25,000  | 25,000  | 40,000  | .       | .       | .       | .       | .       |
| National Center for Policy Analysis | Ed Foundation                                                 | .       | .       | .       | .       | .       | .       | 25,000  | .       |
| National Center for Policy Analysis | Eli Lilly and Company Foundation                              | 10,000  | 10,000  | .       | .       | .       | .       | .       | .       |
| National Center for Policy Analysis | Ewing Marion Kauffman Foundation                              | .       | .       | .       | .       | .       | 200,000 | .       | 200,000 |
| National Center for Policy Analysis | ExxonMobil Foundation                                         | 75,000  | 75,000  | 75,000  | .       | .       | .       | .       | .       |
| National Center for Policy Analysis | General Motors Foundation, Inc.                               | 30,000  | 30,000  | .       | .       | .       | .       | .       | .       |
| National Center for Policy Analysis | Gilder Foundation, Inc.                                       | 20,000  | 150,000 | .       | .       | .       | .       | .       | .       |
| National Center for Policy Analysis | Hatton W. Sumners Found for the Study & Teaching of Self-Govt | 455,000 | 300,000 | 391,305 | 390,000 | 54,000  | 404,700 | 389,895 | .       |
| National Center for Policy Analysis | Hirsch Family Foundation                                      | .       | .       | 144,000 | 325,926 | 478,591 | .       | .       | .       |
| National Center for Policy Analysis | John William Pope Foundation                                  | .       | 5,000   | 10,000  | 10,000  | 10,000  | 10,000  | 10,000  | .       |
| National Center for Policy Analysis | K. C. Ames Foundation                                         | .       | 20,000  | .       | .       | .       | .       | .       | .       |
| National Center for Policy Analysis | Koch Affiliated Foundations                                   | 30,000  | 45,000  | 25,000  | 25,000  | 40,000  | 40,000  | 25,000  | 25,000  |
| National Center for Policy Analysis | Lilly Endowment Inc.                                          | 150,000 | 150,000 | 150,000 | 150,000 | 150,000 | 150,000 | 150,000 | 150,000 |
| National Center for Policy Analysis | Lovett & Ruth Peters Foundation                               | .       | .       | .       | .       | .       | 50,000  | .       | .       |
| National Center for Policy Analysis | M. J. Murdock Charitable Trust                                | .       | .       | 450,000 | .       | 450,000 | .       | .       | .       |
| National Center for Policy Analysis | Modzelewski Charitable Trust                                  | 10,000  | 10,000  | .       | .       | .       | .       | .       | .       |
| National Center for Policy Analysis | Rose-Marie and Jack R. Anderson Foundation                    | 25,000  | 40,000  | 40,000  | 40,000  | 40,000  | 50,000  | 65,000  | 50,000  |
| National Center for Policy Analysis | Scaife Affiliated Foundations                                 | 125,000 | 125,000 | 125,000 | 125,000 | 125,000 | 125,000 | 100,000 | 100,000 |
| National Center for Policy Analysis | Sid W. Richardson Foundation                                  | .       | 200,000 | 100,000 | 100,000 | 100,000 | 100,000 | 100,000 | 100,000 |
| National Center for Policy Analysis | The Achelis Foundation                                        | .       | .       | .       | .       | 75,000  | .       | .       | .       |
| National Center for Policy Analysis | The Anschutz Foundation                                       | 10,000  | 10,000  | .       | 10,000  | 30,000  | 15,000  | .       | .       |
| National Center for Policy Analysis | The Armstrong Foundation                                      | 45,000  | 45,000  | 45,000  | 45,000  | 60,000  | 20,000  | .       | 45,000  |
| National Center for Policy Analysis | The Bodman Foundation                                         | .       | 50,000  | .       | .       | .       | .       | 50,000  | .       |
| National Center for Policy Analysis | The Chisholm Foundation                                       | 50,000  | 50,000  | 50,000  | 50,000  | .       | .       | .       | .       |
| National Center for Policy Analysis | The Chrysler Foundation                                       | 15,000  | 15,000  | .       | .       | .       | .       | .       | .       |
| National Center for Policy Analysis | The Gordon and Mary Cain Foundation                           | 20,000  | 25,000  | 25,000  | 20,000  | .       | .       | .       | .       |
| National Center for Policy Analysis | The Jean I. & Charles H. Brunie Foundation                    | 25,000  | 36,500  | 30,000  | 35,000  | .       | .       | .       | .       |
| National Center for Policy Analysis | The Jeld-Wen Foundation                                       | 50,000  | 50,000  | 50,000  | .       | 50,000  | .       | .       | .       |
| National Center for Policy Analysis | The JM Foundation                                             | .       | .       | .       | .       | .       | 35,000  | 25,000  | .       |
| National Center for Policy Analysis | The Lynde and Harry Bradley Foundation, Inc.                  | 157,500 | 145,000 | 195,000 | 95,000  | 140,000 | 170,000 | 160,000 | 150,000 |
| National Center for Policy Analysis | The Marcus Foundation, Inc.                                   | .       | .       | .       | .       | .       | .       | .       | 1,500   |
| National Center for Policy Analysis | The Paul Singer Family Foundation                             | 10,000  | 10,000  | .       | .       | .       | .       | .       | .       |
| National Center for Policy Analysis | The Roe Foundation                                            | 1,000   | .       | .       | .       | .       | .       | .       | .       |

| Recipient                                       | Foundation                                              | 2003    | 2004   | 2005   | 2006   | 2007    | 2008   | 2009   | 2010   |
|-------------------------------------------------|---------------------------------------------------------|---------|--------|--------|--------|---------|--------|--------|--------|
| National Center for Policy Analysis             | The Samuel Roberts Noble Foundation, Inc.               | .       | .      | .      | .      | .       | 30,000 | .      | .      |
| National Center for Policy Analysis             | The TWS Foundation                                      | 200,000 | .      | 50,000 | .      | .       | .      | .      | .      |
| National Center for Public Policy Research      | Bialkin Family Foundation                               | .       | .      | .      | .      | .       | .      | .      | 250    |
| National Center for Public Policy Research      | Chase Foundation of Virginia                            | .       | .      | .      | .      | .       | 1,000  | .      | .      |
| National Center for Public Policy Research      | Coors Affiliated Foundations                            | .       | .      | .      | .      | .       | 30,000 | .      | .      |
| National Center for Public Policy Research      | Donors Trust/Donors Capital Fund                        | .       | .      | .      | 2,200  | .       | 9,000  | .      | 14,500 |
| National Center for Public Policy Research      | Dunn's Foundation for the Advancement of Right Thinking | .       | .      | .      | .      | .       | .      | .      | 20,000 |
| National Center for Public Policy Research      | ExxonMobil Foundation                                   | 55,000  | 55,000 | 55,000 | .      | .       | .      | .      | .      |
| National Center for Public Policy Research      | Scaife Affiliated Foundations                           | 50,000  | 50,000 | 50,000 | 50,000 | 50,000  | .      | 35,000 | 35,000 |
| National Center for Public Policy Research      | The Armstrong Foundation                                | .       | .      | .      | 2,500  | .       | .      | .      | .      |
| National Center for Public Policy Research      | The Chrysler Foundation                                 | 30,000  | 30,000 | .      | .      | .       | .      | .      | .      |
| National Center for Public Policy Research      | The Gordon and Mary Cain Foundation                     | .       | 10,000 | 15,000 | 10,000 | .       | .      | .      | .      |
| National Center for Public Policy Research      | The Roe Foundation                                      | .       | .      | 1,000  | .      | .       | .      | .      | .      |
| National Petrochemical and Refiners Association | American Petroleum Institute                            | .       | .      | .      | .      | .       | .      | .      | 45,000 |
| National Taxpayers Union                        | Donors Trust/Donors Capital Fund                        | .       | 1,000  | .      | .      | .       | .      | .      | .      |
| National Taxpayers Union                        | Dunn's Foundation for the Advancement of Right Thinking | .       | .      | .      | .      | .       | .      | .      | 10,000 |
| National Taxpayers Union                        | Hilton Family Foundation                                | 5,000   | .      | 5,000  | .      | .       | .      | .      | .      |
| National Taxpayers Union                        | John William Pope Foundation                            | 1,000   | 1,000  | .      | .      | 10,000  | 10,000 | .      | .      |
| National Taxpayers Union                        | Searle Freedom Trust                                    | 25,000  | .      | .      | .      | .       | .      | .      | 40,000 |
| National Taxpayers Union                        | The Armstrong Foundation                                | 10,000  | .      | 10,000 | 10,000 | .       | .      | 10,000 | .      |
| National Taxpayers Union                        | The JM Foundation                                       | .       | .      | .      | .      | .       | .      | .      | 25,000 |
| National Taxpayers Union Foundation             | Donors Trust/Donors Capital Fund                        | .       | .      | .      | 2,500  | 504,250 | 13,600 | .      | 2,600  |
| National Taxpayers Union Foundation             | E. A. Morris Charitable Foundation                      | 35,000  | 75,000 | 45,000 | 50,000 | 60,000  | 20,000 | 10,000 | .      |
| National Taxpayers Union Foundation             | ExxonMobil Foundation                                   | .       | .      | 70,000 | .      | .       | .      | .      | .      |
| National Taxpayers Union Foundation             | John William Pope Foundation                            | .       | .      | .      | 10,000 | .       | .      | 10,000 | .      |
| National Taxpayers Union Foundation             | Koret Foundation                                        | 2,500   | 2,500  | 1,000  | .      | 3,000   | 3,000  | 3,000  | .      |
| National Taxpayers Union Foundation             | Scaife Affiliated Foundations                           | 100,000 | 60,000 | 60,000 | 75,000 | 75,000  | 75,000 | 50,000 | 50,000 |
| National Taxpayers Union Foundation             | Searle Freedom Trust                                    | .       | 25,000 | .      | 40,000 | 40,000  | 40,000 | 40,000 | .      |
| National Taxpayers Union Foundation             | The Armstrong Foundation                                | .       | .      | .      | .      | 40,000  | 15,000 | .      | .      |
| National Taxpayers Union Foundation             | The Gordon and Mary Cain Foundation                     | .       | 10,000 | 10,000 | 10,000 | .       | .      | .      | .      |
| National Taxpayers Union Foundation             | The JM Foundation                                       | .       | .      | .      | .      | 25,000  | .      | .      | .      |
| National Taxpayers Union Foundation             | The Lynde and Harry Bradley Foundation, Inc.            | 2,500   | 2,500  | 5,000  | 5,000  | 5,000   | .      | 30,000 | 5,000  |
| National Taxpayers Union Foundation             | The Roe Foundation                                      | .       | .      | 1,000  | .      | .       | .      | .      | .      |

| Recipient                                    | Foundation                                                    | 2003    | 2004    | 2005    | 2006    | 2007    | 2008    | 2009    | 2010    |
|----------------------------------------------|---------------------------------------------------------------|---------|---------|---------|---------|---------|---------|---------|---------|
| National Taxpayers Union Foundation          | The San Francisco Foundation                                  | .       | 1,000   | .       | 1,000   | .       | .       | .       | .       |
| National Taxpayers Union Foundation          | The William H. Donner Foundation                              | 10,000  | 10,000  | .       | 10,000  | .       | .       | .       | .       |
| Oklahoma Council of Public Affairs           | Hatton W. Sumners Found for the Study & Teaching of Self-Govt | .       | 100,000 | .       | .       | .       | .       | .       | .       |
| Oklahoma Council of Public Affairs           | Jaquelin Hume Foundation                                      | .       | .       | .       | 20,000  | .       | .       | 15,000  | .       |
| Oklahoma Council of Public Affairs           | The Roe Foundation                                            | .       | .       | 25,000  | 25,000  | 30,000  | .       | 30,000  | 25,000  |
| Oklahoma Council of Public Affairs           | The Samuel Roberts Noble Foundation, Inc.                     | .       | 250,000 | 600,000 | .       | .       | 400,000 | .       | .       |
| Oregon Institute of Science and Medicine     | Charles F. De Ganahl Family Foundation                        | .       | .       | 100,000 | 300,000 | 100,000 | 100,000 | 100,000 | 100,000 |
| Oregon Institute of Science and Medicine     | Mercer Family Foundation                                      | .       | .       | 60,000  | 50,000  | .       | .       | .       | 100,000 |
| Pacific Research Institute for Public Policy | Aequus Institute                                              | 7,500   | 2,500   | .       | .       | 2,500   | .       | 1,000   | .       |
| Pacific Research Institute for Public Policy | Barney Family Foundation                                      | .       | .       | .       | .       | .       | .       | .       | 10,000  |
| Pacific Research Institute for Public Policy | Charles and Ann Johnson Foundation                            | .       | .       | .       | .       | .       | .       | .       | 5,000   |
| Pacific Research Institute for Public Policy | Chase Foundation of Virginia                                  | 15,000  | 16,470  | 15,000  | 15,000  | 10,000  | 10,000  | 10,000  | 15,000  |
| Pacific Research Institute for Public Policy | Coors Affiliated Foundations                                  | .       | 50,000  | .       | 50,000  | 50,000  | .       | .       | 25,000  |
| Pacific Research Institute for Public Policy | Donors Trust/Donors Capital Fund                              | .       | 6,000   | 7,000   | 64,500  | 200,000 | 115,001 | 570,000 | 204,500 |
| Pacific Research Institute for Public Policy | Earhart Foundation                                            | 20,000  | .       | .       | 25,000  | 25,000  | 25,000  | 20,000  | 25,000  |
| Pacific Research Institute for Public Policy | Eli Lilly and Company Foundation                              | 5,000   | 10,000  | 20,000  | 20,000  | 30,000  | 35,000  | 40,000  | 30,000  |
| Pacific Research Institute for Public Policy | Ewing Marion Kauffman Foundation                              | .       | .       | .       | .       | 50,000  | 25,000  | 75,000  | 75,000  |
| Pacific Research Institute for Public Policy | ExxonMobil Foundation                                         | 45,000  | 100,000 | 95,000  | .       | .       | .       | .       | .       |
| Pacific Research Institute for Public Policy | Jaquelin Hume Foundation                                      | 60,000  | 75,000  | .       | 75,000  | 60,000  | 60,000  | 60,000  | 75,000  |
| Pacific Research Institute for Public Policy | John Templeton Foundation                                     | 175,000 | 100,000 | .       | .       | .       | .       | .       | .       |
| Pacific Research Institute for Public Policy | John William Pope Foundation                                  | 10,000  | 10,000  | 10,000  | 10,000  | 10,000  | 10,000  | 10,000  | 10,000  |
| Pacific Research Institute for Public Policy | Koch Affiliated Foundations                                   | 90,000  | 90,000  | 90,000  | 90,000  | 90,000  | 90,000  | 100,000 | .       |
| Pacific Research Institute for Public Policy | Koret Foundation                                              | 35,000  | 80,000  | 40,000  | 108,000 | 68,000  | 88,500  | 85,000  | 235,000 |
| Pacific Research Institute for Public Policy | Lilly Endowment Inc.                                          | 175,000 | 175,000 | 175,000 | 175,000 | 175,000 | .       | .       | .       |
| Pacific Research Institute for Public Policy | Lovett & Ruth Peters Foundation                               | .       | .       | .       | .       | 120,000 | .       | .       | 120,000 |
| Pacific Research Institute for Public Policy | S.D. Bechtel, Jr. Foundation                                  | .       | .       | .       | .       | .       | .       | 2,500   | .       |
| Pacific Research Institute for Public Policy | Scaife Affiliated Foundations                                 | 200,000 | 200,000 | 200,000 | 200,000 | 200,000 | 200,000 | 150,000 | 150,000 |
| Pacific Research Institute for Public Policy | Searle Freedom Trust                                          | 80,000  | 80,000  | .       | 140,000 | 160,000 | 255,000 | 300,000 | 275,000 |
| Pacific Research Institute for Public Policy | The Anschutz Foundation                                       | 10,000  | 10,000  | 25,000  | 20,000  | 30,000  | 65,000  | 65,000  | .       |
| Pacific Research Institute for Public Policy | The Armstrong Foundation                                      | 7,500   | .       | .       | 10,000  | 5,000   | .       | .       | .       |
| Pacific Research Institute for Public Policy | The Bodman Foundation                                         | .       | .       | .       | .       | .       | .       | 25,000  | .       |
| Pacific Research Institute for Public Policy | The Chrysler Foundation                                       | .       | .       | .       | 50,000  | .       | 50,000  | .       | .       |
| Pacific Research Institute for Public Policy | The Jean I. & Charles H. Brunie Foundation                    | 5,000   | 5,000   | 5,000   | .       | .       | .       | .       | .       |

| Recipient                                    | Foundation                                              | 2003    | 2004    | 2005    | 2006    | 2007    | 2008    | 2009    | 2010    |
|----------------------------------------------|---------------------------------------------------------|---------|---------|---------|---------|---------|---------|---------|---------|
| Pacific Research Institute for Public Policy | The JM Foundation                                       | .       | .       | 25,000  | .       | .       | .       | .       | .       |
| Pacific Research Institute for Public Policy | The Kern Family Foundation, Inc.                        | .       | .       | .       | .       | .       | 130,000 | .       | .       |
| Pacific Research Institute for Public Policy | The Lynde and Harry Bradley Foundation, Inc.            | 25,000  | 25,000  | 100,000 | .       | 75,000  | 101,000 | 50,000  | 45,000  |
| Pacific Research Institute for Public Policy | The Roe Foundation                                      | .       | .       | .       | 40,000  | .       | .       | 25,000  | 20,000  |
| Pacific Research Institute for Public Policy | The San Francisco Foundation                            | 24,500  | 30,000  | 60,000  | 25,000  | 10,000  | .       | 15,000  | .       |
| Pacific Research Institute for Public Policy | The William H. Donner Foundation                        | 107,000 | 80,000  | 20,000  | 20,000  | 40,000  | 25,000  | 20,000  | 20,000  |
| Pacific Research Institute for Public Policy | Vanguard Charitable Endowment Program                   | 20,000  | 12,500  | 82,000  | 89,000  | 106,000 | 85,250  | 103,250 | 118,000 |
| Pacific Research Institute for Public Policy | Walton Family Foundation, Inc.                          | 35,000  | 35,000  | 35,000  | 35,000  | 35,000  | 55,000  | .       | .       |
| Pacific Research Institute for Public Policy | WellPoint Foundation, Inc.                              | .       | .       | .       | .       | .       | .       | .       | 98,000  |
| Pacific Research Institute for Public Policy | William E. Simon Foundation, Inc.                       | 50,000  | 50,000  | 80,000  | 80,000  | 75,000  | 75,000  | 80,000  | 80,000  |
| Reason Foundation                            | Aequus Institute                                        | 5,000   | 2,500   | 2,500   | 2,500   | 2,500   | 2,500   | 1,000   | 1,000   |
| Reason Foundation                            | Chase Foundation of Virginia                            | 14,000  | 15,250  | 14,000  | 25,000  | 25,000  | 25,000  | 30,000  | 30,000  |
| Reason Foundation                            | Coors Affiliated Foundations                            | 50,000  | .       | .       | 50,000  | .       | 60,000  | .       | 50,000  |
| Reason Foundation                            | Donors Trust/Donors Capital Fund                        | 1,000   | 4,500   | 132,500 | 35,500  | 104,250 | .       | 76,930  | 97,674  |
| Reason Foundation                            | Dunn's Foundation for the Advancement of Right Thinking | 308,000 | 450,000 | 450,000 | 455,000 | 540,000 | 540,000 | 930,000 | 800,000 |
| Reason Foundation                            | ExxonMobil Foundation                                   | 10,000  | .       | 20,000  | .       | .       | .       | .       | .       |
| Reason Foundation                            | General Motors Foundation, Inc.                         | 25,000  | 25,000  | .       | 10,000  | 15,000  | .       | .       | .       |
| Reason Foundation                            | Gilder Foundation, Inc.                                 | .       | 2,500   | .       | .       | .       | .       | .       | .       |
| Reason Foundation                            | Hilton Family Foundation                                | 2,500   | .       | 5,000   | 5,000   | 2,500   | .       | .       | 2,500   |
| Reason Foundation                            | J. P. Humphreys Foundation                              | 15,000  | 25,000  | .       | .       | 25,000  | 50,000  | .       | .       |
| Reason Foundation                            | Jaquelin Hume Foundation                                | .       | 25,000  | .       | .       | 30,000  | 30,000  | .       | 10,000  |
| Reason Foundation                            | John William Pope Foundation                            | 60,000  | 60,000  | 50,000  | 50,000  | 50,000  | 50,000  | 25,000  | 25,000  |
| Reason Foundation                            | K. C. Ames Foundation                                   | .       | 60,000  | .       | .       | .       | .       | .       | .       |
| Reason Foundation                            | Koch Affiliated Foundations                             | .       | 35,000  | 65,000  | 90,000  | .       | 50,000  | 110,618 | .       |
| Reason Foundation                            | Lilly Endowment Inc.                                    | 225,000 | 225,000 | 225,000 | 225,000 | 225,000 | .       | .       | .       |
| Reason Foundation                            | Lovett & Ruth Peters Foundation                         | .       | .       | .       | .       | .       | 25,000  | 25,000  | 25,000  |
| Reason Foundation                            | Modzelewski Charitable Trust                            | 150,000 | 152,600 | 150,000 | 250,000 | .       | 300,000 | .       | .       |
| Reason Foundation                            | Pierre F. and Enid Goodrich Foundation                  | .       | .       | 20,000  | .       | .       | .       | .       | .       |
| Reason Foundation                            | Scaife Affiliated Foundations                           | .       | 100,000 | 100,000 | 125,000 | 125,000 | 125,000 | 100,000 | 100,000 |
| Reason Foundation                            | Searle Freedom Trust                                    | 100,000 | 100,000 | 100,000 | 250,000 | 250,000 | 810,000 | 750,000 | 805,000 |
| Reason Foundation                            | Susquehanna Foundation                                  | .       | 1,000   | 11,000  | 11,000  | 5,000   | 2,000   | 7,500   | .       |
| Reason Foundation                            | The Alice M. & Thomas J. Tisch Foundation, Inc.         | .       | 50,000  | 25,000  | 25,000  | .       | 25,000  | .       | .       |
| Reason Foundation                            | The Andrew Cader Foundation, Inc.                       | .       | .       | .       | 1,000   | .       | 2,500   | .       | .       |

| Recipient                                | Foundation                                        | 2003   | 2004    | 2005    | 2006    | 2007      | 2008   | 2009    | 2010    |
|------------------------------------------|---------------------------------------------------|--------|---------|---------|---------|-----------|--------|---------|---------|
| Reason Foundation                        | The Armstrong Foundation                          | 2,500  | .       | .       | 2,500   | 5,000     | .      | .       | 12,500  |
| Reason Foundation                        | The Capital Group Companies Charitable Foundation | .      | .       | .       | 5,000   | .         | .      | .       | .       |
| Reason Foundation                        | The Challenge Foundation                          | .      | .       | .       | .       | .         | 5,000  | 5,000   | 5,000   |
| Reason Foundation                        | The Chrysler Foundation                           | 10,000 | 10,000  | 10,000  | 10,000  | 10,000    | 10,000 | .       | .       |
| Reason Foundation                        | The E. L. Craig Foundation                        | .      | .       | 25,000  | 25,000  | 50,000    | 50,000 | .       | 50,000  |
| Reason Foundation                        | The Grover Hermann Foundation                     | 15,000 | 15,000  | 15,000  | 15,000  | .         | .      | .       | .       |
| Reason Foundation                        | The Jeld-Wen Foundation                           | 10,000 | 10,000  | 10,000  | .       | .         | .      | .       | .       |
| Reason Foundation                        | The JM Foundation                                 | .      | .       | 20,000  | .       | .         | 20,000 | .       | .       |
| Reason Foundation                        | The Lynde and Harry Bradley Foundation, Inc.      | 5,000  | 64,000  | 5,000   | 5,000   | 5,000     | .      | 100,000 | 50,000  |
| Reason Foundation                        | The Richard Seth Staley Educational Foundation    | 2,500  | .       | 4,000   | 5,000   | .         | .      | .       | 100     |
| Reason Foundation                        | The Rodney Fund                                   | 8,000  | 6,000   | 15,000  | 13,000  | .         | 21,000 | 7,000   | .       |
| Reason Foundation                        | The Roe Foundation                                | 20,000 | 40,000  | 20,000  | 20,000  | 20,000    | .      | 20,000  | .       |
| Reason Foundation                        | The San Francisco Foundation                      | .      | .       | .       | .       | .         | 30,000 | .       | .       |
| Reason Foundation                        | The William H. Donner Foundation                  | .      | .       | .       | 10,000  | .         | 10,000 | .       | .       |
| Reason Foundation                        | Vanguard Charitable Endowment Program             | 24,000 | 24,000  | 121,180 | 16,500  | 298,000   | 21,500 | 329,500 | 329,500 |
| Reason Foundation                        | Walton Family Foundation, Inc.                    | .      | .       | .       | .       | .         | .      | .       | 40,000  |
| Reason Foundation                        | William E. Simon Foundation, Inc.                 | .      | 40,000  | .       | 40,000  | .         | .      | .       | .       |
| Responsible Resources                    | Donors Trust/Donors Capital Fund                  | .      | .       | .       | .       | 1,000,000 | .      | .       | .       |
| Science and Environmental Policy Project | Bialkin Family Foundation                         | .      | .       | .       | .       | 5,000     | .      | .       | .       |
| Science and Environmental Policy Project | K. C. Ames Foundation                             | .      | 5,000   | .       | .       | .         | .      | .       | .       |
| Science and Environmental Policy Project | Koch Affiliated Foundations                       | 5,000  | .       | .       | .       | .         | .      | .       | .       |
| Science and Environmental Policy Project | Vanguard Charitable Endowment Program             | .      | .       | .       | .       | .         | .      | 10,000  | .       |
| Science and Public Policy Institute      | The Lynde and Harry Bradley Foundation, Inc.      | .      | .       | .       | .       | .         | .      | .       | 25,000  |
| Southeastern Legal Foundation            | Aequus Institute                                  | .      | 1,000   | .       | .       | .         | .      | .       | .       |
| Southeastern Legal Foundation            | Coors Affiliated Foundations                      | .      | 35,000  | 50,000  | .       | 50,000    | .      | 50,000  | 30,000  |
| Southeastern Legal Foundation            | Covenant Foundation, Inc.                         | .      | 50,000  | 50,000  | 5,000   | .         | .      | .       | .       |
| Southeastern Legal Foundation            | Hilton Family Foundation                          | 5,000  | .       | .       | .       | .         | .      | .       | .       |
| Southeastern Legal Foundation            | John William Pope Foundation                      | .      | 1,000   | .       | .       | .         | .      | .       | .       |
| Southeastern Legal Foundation            | Scaife Affiliated Foundations                     | .      | 100,000 | 100,000 | 75,000  | 75,000    | 75,000 | 50,000  | 50,000  |
| Southeastern Legal Foundation            | The Armstrong Foundation                          | 5,000  | .       | .       | .       | .         | .      | .       | .       |
| Southeastern Legal Foundation            | The Lynde and Harry Bradley Foundation, Inc.      | 11,000 | 1,000   | 1,000   | 1,000   | 1,000     | .      | 50,000  | 25,000  |
| Southeastern Legal Foundation            | The Marcus Foundation, Inc.                       | .      | .       | .       | .       | .         | 25,000 | 250,000 | .       |
| Southeastern Legal Foundation            | The Samuel Roberts Noble Foundation, Inc.         | .      | 75,000  | 50,000  | 225,000 | .         | .      | .       | .       |

| Recipient                      | Foundation                                     | 2003    | 2004    | 2005    | 2006    | 2007      | 2008      | 2009      | 2010      |
|--------------------------------|------------------------------------------------|---------|---------|---------|---------|-----------|-----------|-----------|-----------|
| Southeastern Legal Foundation  | William Howard Flowers, Jr. Foundation, Inc.   | .       | 100,000 | 100,000 | 100,000 | 100,000   | 100,000   | .         | 100,000   |
| State Policy Network           | Aequus Institute                               | .       | .       | .       | .       | .         | .         | .         | 1,000     |
| State Policy Network           | Barbara and Barre Seid Foundation              | .       | .       | .       | 150,000 | .         | .         | .         | .         |
| State Policy Network           | Chase Foundation of Virginia                   | 15,000  | 15,860  | .       | .       | .         | .         | 10,000    | 10,000    |
| State Policy Network           | Coors Affiliated Foundations                   | .       | .       | 25,000  | .       | 30,000    | .         | 35,000    | 20,000    |
| State Policy Network           | Daniels Fund                                   | .       | .       | .       | 25,000  | .         | .         | .         | .         |
| State Policy Network           | Dodge Jones Foundation                         | .       | .       | .       | .       | .         | .         | .         | 3,500     |
| State Policy Network           | Donors Trust/Donors Capital Fund               | 1,000   | 2,750   | 78,500  | 14,700  | 1,528,600 | 1,489,250 | 2,584,747 | 2,279,287 |
| State Policy Network           | Ed Foundation                                  | .       | .       | .       | .       | .         | 50,000    | .         | .         |
| State Policy Network           | Eli Lilly and Company Foundation               | .       | .       | 15,000  | 15,000  | .         | .         | .         | .         |
| State Policy Network           | Hilton Family Foundation                       | .       | .       | .       | .       | .         | .         | 10,000    | .         |
| State Policy Network           | J. P. Humphreys Foundation                     | .       | 5,000   | .       | .       | 5,000     | .         | 5,000     | 5,000     |
| State Policy Network           | Jaquelin Hume Foundation                       | 50,000  | 50,000  | .       | 75,000  | 75,000    | 75,000    | 75,000    | 100,000   |
| State Policy Network           | John Dawson Foundation                         | .       | .       | .       | .       | .         | .         | .         | 25,000    |
| State Policy Network           | John William Pope Foundation                   | .       | .       | .       | .       | 10,000    | 10,000    | 10,000    | 25,000    |
| State Policy Network           | Koch Affiliated Foundations                    | .       | 2,500   | 15,000  | 15,000  | .         | .         | .         | .         |
| State Policy Network           | Lovett & Ruth Peters Foundation                | .       | .       | .       | .       | .         | 10,000    | 10,000    | 35,000    |
| State Policy Network           | Searle Freedom Trust                           | .       | 15,000  | .       | 241,000 | 355,000   | 360,000   | 341,000   | 371,500   |
| State Policy Network           | The Armstrong Foundation                       | .       | .       | .       | .       | 5,000     | 10,000    | 5,000     | 15,000    |
| State Policy Network           | The E. L. Craig Foundation                     | .       | 5,000   | .       | .       | .         | .         | .         | .         |
| State Policy Network           | The Grover Hermann Foundation                  | .       | 10,000  | .       | .       | .         | .         | 10,000    | 10,000    |
| State Policy Network           | The Jeld-Wen Foundation                        | 15,000  | 15,000  | 15,000  | .       | 10,000    | .         | .         | .         |
| State Policy Network           | The JM Foundation                              | 50,000  | 75,000  | .       | .       | .         | 75,000    | 75,000    | 75,000    |
| State Policy Network           | The Lynde and Harry Bradley Foundation, Inc.   | .       | .       | 40,000  | .       | 15,000    | .         | 25,000    | 30,000    |
| State Policy Network           | The Richard Seth Staley Educational Foundation | .       | .       | .       | .       | .         | .         | .         | 4,783     |
| State Policy Network           | The Rodney Fund                                | .       | 1,000   | 6,000   | 8,000   | .         | 4,000     | .         | .         |
| State Policy Network           | The Roe Foundation                             | 80,000  | 65,000  | 65,000  | 90,000  | 65,000    | 65,000    | 65,000    | 70,000    |
| State Policy Network           | The William H. Donner Foundation               | .       | .       | .       | .       | 15,000    | 25,000    | .         | .         |
| State Policy Network           | Vanguard Charitable Endowment Program          | .       | .       | .       | .       | .         | .         | 20,000    | 11,000    |
| Texas Public Policy Foundation | Bill & Melinda Gates Foundation                | .       | .       | 170,000 | .       | .         | .         | .         | .         |
| Texas Public Policy Foundation | Communities Foundation of Texas, Inc.          | .       | .       | .       | .       | .         | 10,000    | .         | .         |
| Texas Public Policy Foundation | Coors Affiliated Foundations                   | .       | .       | .       | .       | .         | 30,000    | 30,000    | .         |
| Texas Public Policy Foundation | Covenant Foundation, Inc.                      | 175,000 | 150,000 | 50,000  | 25,000  | 125,000   | .         | 10,000    | 50,000    |

| Recipient                                    | Foundation                                     | 2003   | 2004   | 2005    | 2006    | 2007    | 2008    | 2009    | 2010    |
|----------------------------------------------|------------------------------------------------|--------|--------|---------|---------|---------|---------|---------|---------|
| Texas Public Policy Foundation               | Dodge Jones Foundation                         | .      | .      | 5,000   | .       | .       | .       | .       | 10,000  |
| Texas Public Policy Foundation               | Donors Trust/Donors Capital Fund               | .      | 500    | 200,250 | 49,500  | 152,500 | 455,500 | 930,000 | 677,508 |
| Texas Public Policy Foundation               | Ed Foundation                                  | 10,000 | 10,000 | 10,000  | 129,000 | 91,000  | 172,000 | 92,000  | 200,495 |
| Texas Public Policy Foundation               | Jaquelin Hume Foundation                       | 25,000 | 41,420 | .       | 57,937  | 35,000  | 35,000  | 35,000  | 40,000  |
| Texas Public Policy Foundation               | Koch Affiliated Foundations                    | .      | 66,374 | 45,642  | 92,983  | 70,000  | 74,500  | 100,000 | 50,000  |
| Texas Public Policy Foundation               | Searle Freedom Trust                           | .      | .      | .       | .       | 100,000 | .       | .       | .       |
| Texas Public Policy Foundation               | The Armstrong Foundation                       | .      | .      | .       | 10,000  | 20,000  | 10,000  | 10,000  | 10,000  |
| Texas Public Policy Foundation               | The Gordon and Mary Cain Foundation            | 25,000 | .      | 50,000  | 50,000  | .       | .       | .       | .       |
| Texas Public Policy Foundation               | The Jeld-Wen Foundation                        | .      | .      | 10,000  | .       | 10,000  | .       | .       | .       |
| Texas Public Policy Foundation               | The JM Foundation                              | .      | .      | .       | 20,000  | .       | .       | 25,000  | .       |
| Texas Public Policy Foundation               | The Lynde and Harry Bradley Foundation, Inc.   | .      | .      | .       | .       | .       | .       | .       | 40,000  |
| Texas Public Policy Foundation               | The Roe Foundation                             | 10,000 | .      | 20,000  | .       | 30,000  | 30,000  | 30,000  | 25,000  |
| Texas Public Policy Foundation               | The William H. Donner Foundation               | .      | .      | .       | .       | .       | .       | 10,000  | .       |
| Thomas Jefferson Institute for Public Policy | Chase Foundation of Virginia                   | 4,000  | .      | 4,000   | 4,000   | 3,500   | 3,500   | 3,500   | 4,000   |
| Thomas Jefferson Institute for Public Policy | Donors Trust/Donors Capital Fund               | .      | .      | .       | .       | 5,000   | 50,000  | 96,950  | 65,000  |
| Thomas Jefferson Institute for Public Policy | Jaquelin Hume Foundation                       | 25,000 | 25,000 | 25,000  | 25,000  | .       | .       | 25,000  | 25,000  |
| Thomas Jefferson Institute for Public Policy | The JM Foundation                              | .      | .      | .       | .       | .       | 25,000  | 25,000  | .       |
| Thomas Jefferson Institute for Public Policy | The Kern Family Foundation, Inc.               | .      | .      | 20,000  | .       | .       | .       | .       | .       |
| Thomas Jefferson Institute for Public Policy | The Roe Foundation                             | .      | .      | 10,000  | 10,000  | .       | .       | 20,000  | 15,000  |
| U.S. Chamber Of Commerce                     | American Petroleum Institute                   | .      | .      | .       | .       | .       | 50,000  | 136,500 | .       |
| Washington Policy Center                     | Coors Affiliated Foundations                   | 10,000 | .      | .       | 10,000  | .       | .       | 20,000  | .       |
| Washington Policy Center                     | Donors Trust/Donors Capital Fund               | .      | .      | .       | .       | 20,000  | 105,200 | 180,000 | 189,575 |
| Washington Policy Center                     | Jaquelin Hume Foundation                       | .      | .      | .       | 10,000  | 10,000  | 10,000  | 15,000  | 20,000  |
| Washington Policy Center                     | M. J. Murdock Charitable Trust                 | .      | 45,000 | 50,000  | .       | 180,000 | .       | .       | .       |
| Washington Policy Center                     | The JM Foundation                              | 20,000 | .      | .       | 20,000  | .       | 25,000  | .       | .       |
| Washington Policy Center                     | The Richard Seth Staley Educational Foundation | .      | 2,000  | 2,000   | 2,000   | 2,500   | 2,500   | 2,500   | .       |
| Washington Policy Center                     | The Roe Foundation                             | .      | .      | 15,000  | .       | 20,000  | .       | 25,000  | 25,000  |



**Table S 10 Climate Change Counter-movement Network Dimensions**

|                        | <b>2003</b> | <b>2004</b> | <b>2005</b> | <b>2006</b> | <b>2007</b> | <b>2008</b> | <b>2009</b> | <b>2010</b> |
|------------------------|-------------|-------------|-------------|-------------|-------------|-------------|-------------|-------------|
| Foundations            | 94          | 100         | 103         | 106         | 102         | 105         | 102         | 103         |
| Organizations          | 52          | 51          | 51          | 48          | 52          | 50          | 52          | 51          |
| Maximum Links Possible | 4888        | 5100        | 5253        | 5088        | 5304        | 5250        | 5304        | 5253        |
| Total links            | 502         | 492         | 534         | 521         | 513         | 504         | 511         | 500         |
| Network Density        | 0.103       | 0.096       | 0.102       | 0.102       | 0.097       | 0.096       | 0.096       | 0.095       |

**Table S 11 Climate Change Counter-movement Network - Relative Node Strength**

| <b>Foundation</b>                                       | <b>2003</b> | <b>2004</b> | <b>2005</b> | <b>2006</b> | <b>2007</b> | <b>2008</b> | <b>2009</b> | <b>2010</b> |
|---------------------------------------------------------|-------------|-------------|-------------|-------------|-------------|-------------|-------------|-------------|
| Donors Trust/Donors Capital Fund                        | 3.3%        | 4.9%        | 6.7%        | 7.0%        | 14.0%       | 17.7%       | 24.7%       | 23.7%       |
| Scaife Affiliated Foundations                           | 12.4%       | 8.2%        | 7.2%        | 7.3%        | 7.4%        | 6.1%        | 5.2%        | 5.8%        |
| The Lynde and Harry Bradley Foundation, Inc.            | 6.0%        | 6.8%        | 6.6%        | 4.9%        | 5.7%        | 4.0%        | 4.5%        | 5.3%        |
| Koch Affiliated Foundations                             | 2.4%        | 2.9%        | 6.0%        | 9.3%        | 7.1%        | 5.0%        | 3.1%        | 1.7%        |
| Howard Charitable Foundation                            | 0.0%        | 0.0%        | 0.0%        | 14.1%       | 7.9%        | 7.1%        | 1.6%        | 1.7%        |
| John William Pope Foundation                            | 4.2%        | 4.1%        | 4.1%        | 4.8%        | 4.3%        | 3.9%        | 2.8%        | 3.6%        |
| Searle Freedom Trust                                    | 1.4%        | 1.4%        | 0.7%        | 2.6%        | 5.1%        | 5.4%        | 6.0%        | 5.6%        |
| John Templeton Foundation                               | 6.2%        | 5.8%        | 3.8%        | 6.3%        | 2.0%        | 1.3%        | 2.0%        | 3.7%        |
| Dunn's Foundation for the Advancement of Right Thinking | 2.7%        | 2.9%        | 2.5%        | 2.2%        | 2.1%        | 1.8%        | 3.5%        | 2.2%        |
| Smith Richardson Foundation, Inc.                       | 1.9%        | 1.5%        | 3.2%        | 3.1%        | 3.2%        | 2.9%        | 2.1%        | 1.5%        |
| Vanguard Charitable Endowment Program                   | 1.0%        | 1.2%        | 2.1%        | 2.3%        | 3.9%        | 2.4%        | 2.9%        | 2.2%        |
| The Kovner Foundation                                   | 3.4%        | 2.5%        | 2.3%        | 0.4%        | 0.4%        | 1.5%        | 4.2%        | 3.8%        |
| Annenberg Foundation                                    | 1.0%        | 3.9%        | 3.6%        | 0.0%        | 0.0%        | 4.0%        | 0.0%        | 3.8%        |
| Lilly Endowment Inc.                                    | 4.0%        | 2.6%        | 2.3%        | 1.9%        | 1.8%        | 1.1%        | 1.2%        | 1.1%        |
| The Richard and Helen DeVos Foundation                  | 0.4%        | 1.4%        | 1.2%        | 1.1%        | 1.6%        | 3.8%        | 1.9%        | 2.0%        |
| ExxonMobil Foundation                                   | 4.7%        | 4.2%        | 3.7%        | 0.6%        | 0.1%        | 0.0%        | 0.0%        | 0.0%        |
| Brady Education Foundation, Inc.                        | 13.7%       | 0.0%        | 0.0%        | 0.0%        | 0.0%        | 0.0%        | 0.0%        | 0.0%        |
| The Samuel Roberts Noble Foundation, Inc.               | 0.0%        | 10.4%       | 1.1%        | 0.4%        | 0.0%        | 0.5%        | 0.0%        | 0.0%        |
| Coors Affiliated Foundations                            | 1.5%        | 1.5%        | 0.9%        | 1.1%        | 1.0%        | 0.9%        | 1.3%        | 0.9%        |
| Lakeside Foundation                                     | 1.6%        | 0.6%        | 1.8%        | 1.8%        | 1.1%        | 0.7%        | 0.8%        | 0.4%        |
| Herrick Foundation                                      | 1.0%        | 0.5%        | 3.6%        | 0.8%        | 0.7%        | 0.6%        | 1.3%        | 0.4%        |

**Table S 12 Climate Change Counter-movement Network - Relative Node Degree**

| <b>Foundation</b>                                       | <b>2003</b> | <b>2004</b> | <b>2005</b> | <b>2006</b> | <b>2007</b> | <b>2008</b> | <b>2009</b> | <b>2010</b> |
|---------------------------------------------------------|-------------|-------------|-------------|-------------|-------------|-------------|-------------|-------------|
| Donors Trust/Donors Capital Fund                        | 1.8%        | 4.3%        | 4.1%        | 6.0%        | 6.8%        | 7.3%        | 6.3%        | 7.0%        |
| Scaife Affiliated Foundations                           | 4.2%        | 4.5%        | 4.3%        | 4.6%        | 4.9%        | 4.8%        | 4.5%        | 4.2%        |
| The Lynde and Harry Bradley Foundation, Inc.            | 4.4%        | 4.7%        | 4.9%        | 4.4%        | 5.1%        | 4.0%        | 4.9%        | 5.2%        |
| Koch Affiliated Foundations                             | 2.6%        | 3.0%        | 3.6%        | 3.3%        | 3.1%        | 2.8%        | 2.9%        | 2.4%        |
| Howard Charitable Foundation                            | 0.0%        | 0.0%        | 0.0%        | 0.4%        | 0.4%        | 0.4%        | 0.4%        | 0.4%        |
| John William Pope Foundation                            | 2.6%        | 3.3%        | 2.4%        | 3.1%        | 3.1%        | 3.2%        | 3.3%        | 2.6%        |
| Searle Freedom Trust                                    | 2.0%        | 2.2%        | 1.1%        | 2.7%        | 2.9%        | 3.4%        | 3.1%        | 3.2%        |
| John Templeton Foundation                               | 0.8%        | 0.8%        | 1.5%        | 1.9%        | 1.9%        | 1.4%        | 1.4%        | 0.8%        |
| Dunn's Foundation for the Advancement of Right Thinking | 1.4%        | 1.8%        | 1.1%        | 1.3%        | 1.4%        | 1.2%        | 1.4%        | 2.0%        |
| Smith Richardson Foundation, Inc.                       | 0.6%        | 0.6%        | 0.9%        | 1.0%        | 1.0%        | 0.8%        | 1.0%        | 0.8%        |
| Vanguard Charitable Endowment Program                   | 2.4%        | 2.6%        | 2.6%        | 2.7%        | 3.1%        | 2.8%        | 3.7%        | 3.2%        |
| The Kovner Foundation                                   | 0.2%        | 0.2%        | 0.2%        | 0.2%        | 0.2%        | 0.2%        | 0.2%        | 0.2%        |
| Annenberg Foundation                                    | 0.2%        | 0.2%        | 0.2%        | 0.0%        | 0.0%        | 0.2%        | 0.0%        | 0.2%        |
| Lillian S. Wells Foundation, Inc.                       | 0.2%        | 0.4%        | 0.4%        | 0.2%        | 0.6%        | 0.2%        | 0.4%        | 0.4%        |
| The Richard and Helen DeVos Foundation                  | 0.6%        | 0.6%        | 0.6%        | 0.6%        | 0.8%        | 0.8%        | 0.8%        | 0.8%        |
| ExxonMobil Foundation                                   | 6.0%        | 4.7%        | 5.4%        | 1.5%        | 0.8%        | 0.2%        | 0.0%        | 0.0%        |
| Brady Education Foundation, Inc.                        | 0.6%        | 0.0%        | 0.0%        | 0.0%        | 0.0%        | 0.0%        | 0.0%        | 0.0%        |
| The Samuel Roberts Noble Foundation, Inc.               | 0.0%        | 0.6%        | 0.4%        | 0.4%        | 0.0%        | 0.4%        | 0.0%        | 0.0%        |
| Coors Affiliated Foundations                            | 2.6%        | 2.4%        | 1.5%        | 2.5%        | 2.1%        | 2.4%        | 3.3%        | 2.6%        |
| Lakeside Foundation                                     | 0.4%        | 0.4%        | 0.4%        | 0.4%        | 0.4%        | 0.4%        | 0.4%        | 0.4%        |
| Herrick Foundation                                      | 0.2%        | 0.2%        | 0.4%        | 0.4%        | 0.4%        | 0.4%        | 0.2%        | 0.4%        |

## Climate Change Countermovement Organizations Income Distribution 2003 - 2010

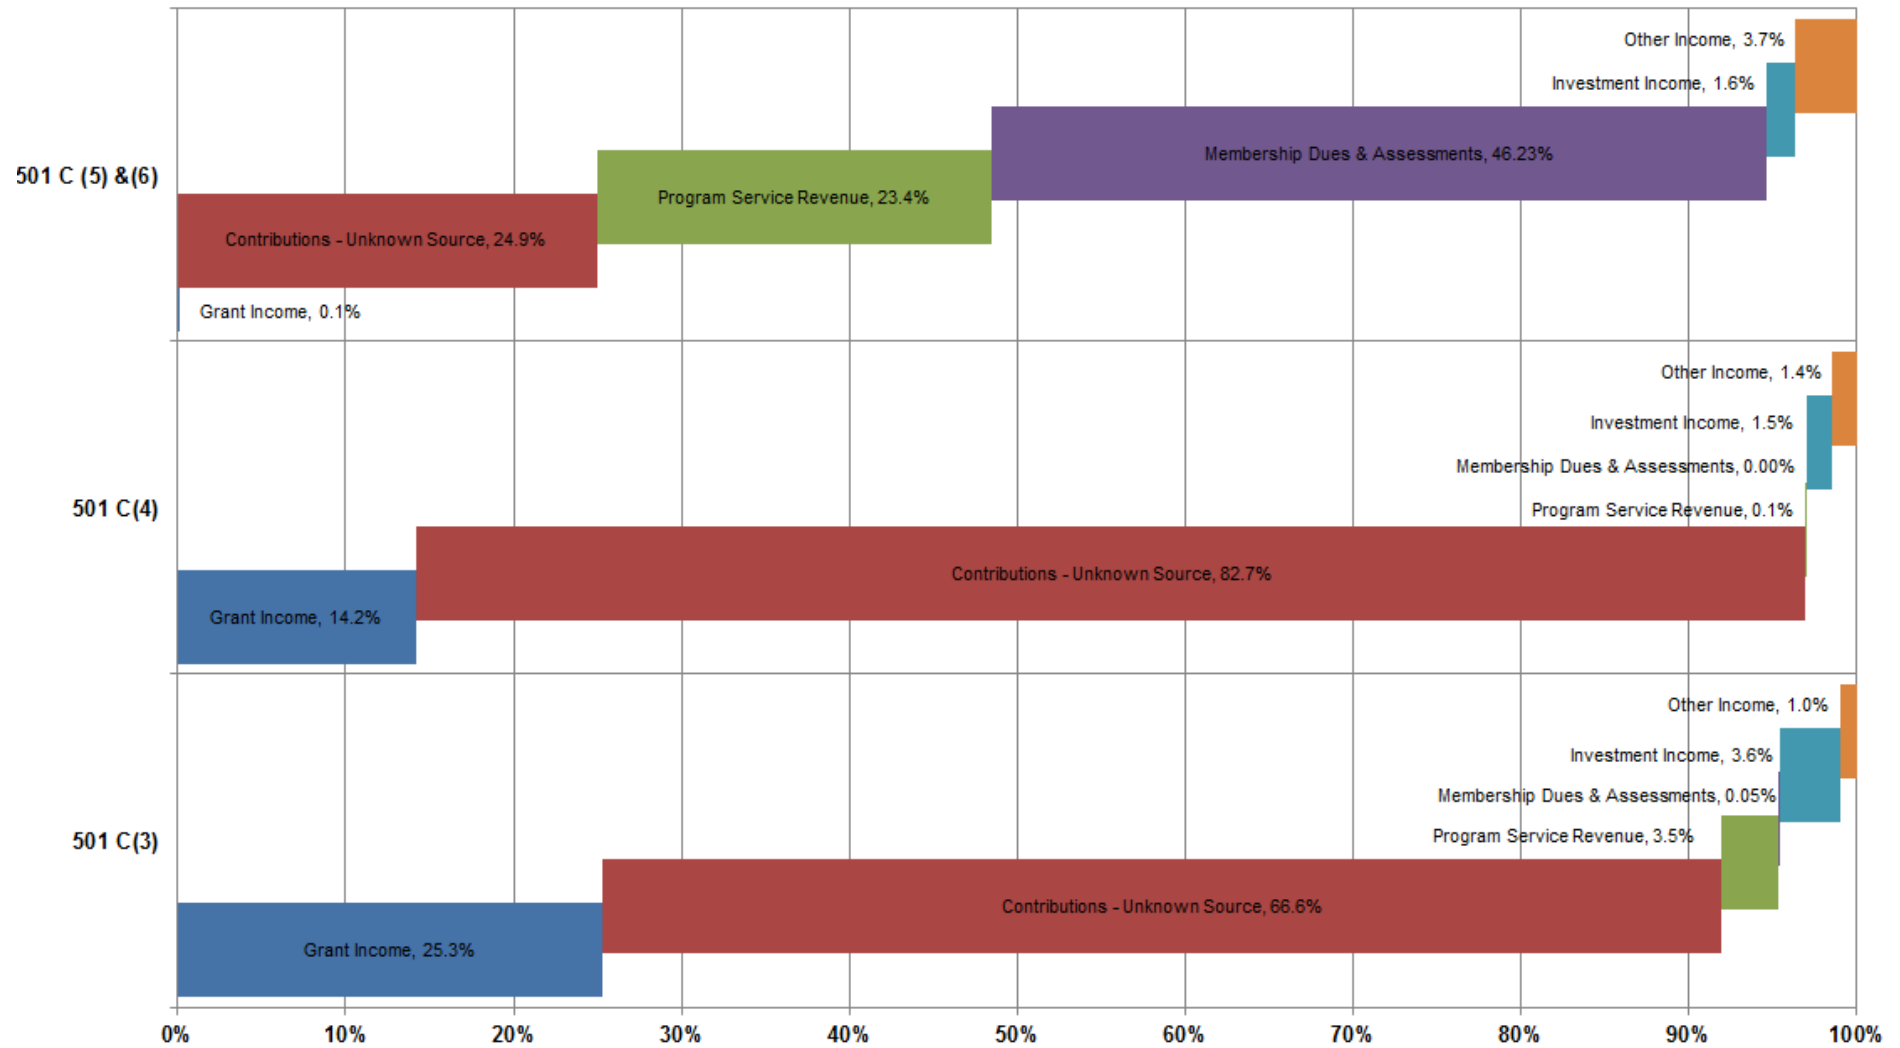

Figure S-1

## Methodological Appendix

### Organizational Listing Procedure

To develop a comprehensive roster of CCCM organizations<sup>i</sup> for this study, a two-step process was used. First, a consolidated list of all of the organizations identified in prior studies was created. <sup>.ii</sup> This compilation resulted in a list of 538 organizations for consideration as a CCCM organization. These organizations were then individually examined<sup>iii</sup> by two independent coders and assigned to one of the following four categories:<sup>iv</sup>

1. CCCM Single Focus Organization - climate change is its sole focus
2. CCCM Multiple Focus Organization – climate change focus substantive, but not sole concern
3. CCCM Peripheral Organization – climate change minor focus
4. Not a CCCM Organization – no apparent focus on climate change

For example, the Science and Environmental Policy Project was coded into the first category as solely focused on the issue of climate change. This organization is engaged only in the climate change arena. Alternatively, the Cato Institute was coded into the second group, as having a substantive but not exclusive focus on climate change. While the Cato Institute is a significant organization in the CCCM, it is not focused only on the issue of climate change, and participates in a number of different issue arenas. This coding resulted in the following distribution of organizations:

|     |                                  |
|-----|----------------------------------|
| 31  | CCCM single focus organization   |
| 87  | CCCM multiple focus organization |
| 100 | CCCM peripheral organization     |
| 320 | Not a CCCM Organization          |

The 118 organizations coded as either having a sole (1) or substantive (2) policy focus on climate change were selected for further analysis, and together constitute a comprehensive sample of the core CCCM organizations in the U.S. The coding sheet, procedures, and list of selected organizations are provided in the Supplemental Material, Tables S-1 to S-3 (See Supplementary Material, pages 2-4).

To evaluate the adequacy of this sample, an organizational comparison was conducted utilizing the listings of CCCM think tanks compiled in two previous studies (McCright and Dunlap 2000 and Jacques, Dunlap, and Freeman 2008). This comparative analysis showed that more than 90% of the organizations examined in these two previous analyses were also included in the 118 organizations on which this analysis is based. The key organizational entities in the CCCM are think tanks, advocacy organizations, and trade associations. The distinction between think tanks and advocacy organizations is somewhat arbitrary and is based on the organization's self-description. For example, the Heartland Association describes itself as a "think tank," but clearly engages in advocacy work. Based on these self-

descriptions, the sample is comprised of 30.5% (36/118) think tanks, 44.9% (53/118) advocacy organizations, 11.9% (14/118) trade associations, and 12.7% (15/118) other organizations, such as blog sites and operating foundations. This distribution is generally in line with other analyses of the composition of the CCCM (Dunlap and McCright 2011: 148 – 154), and thus this sample should provide a valid measure of the core organizations of the U.S. CCCM.

#### Funding Data Procedures

To determine the amount and sources of income for the CCCM organizations, IRS data were extracted from both the National Center for Charitable Statistics and the Foundation Center for the period 2003 to 2010. Due to limits on the Foundation Center's data, this time frame is the longest that can be analyzed, and thus sets the limits of the time frame that could be examined. However, this range covers an extremely important period in history encompassing the time before and after a peak of climate change media coverage, legislative hearings, and public concern that ran from 2007 to 2009 (Brulle, Carmichael, and Jenkins 2011).

The first step in this analysis was to compile data on the income for the CCCM organizations. Of the 118 CCCM organizations in the sample, IRS income data was available for only 91 organizations.<sup>v</sup> The other 27 organizations did not file IRS information returns because they had not applied for formal nonprofit status, and were not required by law to submit this information. For those 91 CCCM organizations that did file with the IRS, financial information (based on Form IRS 990) was downloaded from the National Center for Charitable Statistics web site.<sup>vi</sup> Where data was incomplete, examination of the IRS 990 filings was conducted. The other organizations did not file IRS 990 forms.

To obtain foundation funding data for each CCCM organization, the Foundation Center grants data base was utilized.<sup>vii</sup> This data base was searched using the names of those 91 CCCM organizations that had IRS records. This provided data on the grants that each organization received for this time period. Where Foundation Center data was incomplete, the individual IRS 990 PF filings of the foundations were examined. This was an especially important step in ensuring data quality in that both Donors Trust and Donors Capital Foundations, which together are the single largest contributing foundations to CCCM organizations, are not listed in the Foundation Center's data base. This examination resulted in the identification of 9,094 individual grants from 1170 different foundation with a total funding amount of \$620 million. To reduce the size of the data set to manageable proportions, major foundation funders of CCCM organizations were identified and selected. Major foundation funders were identified as having given \$500,000 or more over the 2003 – 2010 time period, or \$200,000 in any one year. This resulted in the identification of 146 major CCCM organization funders.<sup>viii</sup> This list was then further consolidated to account for the presence of multiple foundations that operated under the same controlling boards (such as the three Koch managed foundations). These foundations contributions were consolidated and analyzed as a single foundation.<sup>ix</sup> After this consolidation, the final sample for analysis consisted of 140

foundations making 5,299 grants and a total funding level of \$558 million. These grants were given to 69 CCCM organizations out of the total of 91 CCCM organizations that had IRS data. There was no record of any grants being given to 22 CCCM organizations in the sample. This consolidation dramatically reduced both the number of foundations and individual grants. However, because these grants were small, and came from peripheral funders of CCCM organizations, the total funding level was only reduced by 10%. This process provided a workable data set enabled an examination of the financial income of the 91 CCCM organizations.

## References

- Brulle, R. J., J. Carmichael, and J. C. Jenkins. 2012. Shifting Public Opinion on Climate Change; An Empirical Assessment of Factors influencing Concern over Climate Change in the U.S. Climatic Change
- Greenpeace 2010. Koch Industries Secretly Funding the Climate Denial Machine. Greenpeace: Washington DC
- Union of Concerned Scientists 2007 Smoke, Mirrors & Hot Air: How Exxonmobil uses Big Tobacco's Tactics to manufacture Uncertainty on Climate Science. UCS: Boston, MA
- NCRP 1997. Moving a Public Policy Agenda: The Strategic Philanthropy of Conservative Foundations. Washington D.C.: National Committee for Responsive Philanthropy
- Neubauer, R. 2011. Manufacturing junk: Think tanks, climate denial, and neoliberal hegemony. Australian Journal of Communication 38(3) 65-88
- Oreskes, N. and E. M. Conway. 2010. Merchants of Doubt. New York: Bloomsbury Press.

<sup>i</sup> Defining it as the “Denial Machine”, Dunlap and McCright (2011: 148 – 154) see this countermovement composed of 1) trade associations and corporations, 2) think tanks, 3) foundations 4) advocacy/front groups, 5) Sympathetic scientists, 6) Right wing media, and 7) Politicians. Neubauer (2011: 66) defines this countermovement as the “Elite Policy and Information Infrastructure (EPII)”, which is defined as “a decentralized yet interlocked network of conservative intellectuals, activists, think tanks, corporations, foundations, and advocacy organizations.” Finally, Knight and Greenberg (2011: 326) define the “Skeptic” movement as being composed of “corporations, industry associations, corporate-funded foundations, think-tanks, public relations firms, sympathetic intellectuals, academics and media outlets, and elite-funded front groups composed of interested citizens.”

<sup>ii</sup> Criteria and Studies utilized to compile this comprehensive listing of potential CCCM organizations are:

1. Organization represented by a speaker/sponsorship at any of the ICC/Heartland Conference
2. Organization participated in the Global Climate Coalition
3. Organization participated in Alliance for Climate Strategies
4. Organization participated in the Cooler Heads Coalition
5. Organization listed as a climate skeptic organization in Merchants of Doubt (Oreskes and Conway 2010)
6. Organization listed in the Greenpeace study of climate change counter-movement (Greenpeace 2010)
7. Organization listed in the Union of Concerned Scientists study of climate change counter-movement (Union of Concerned Scientists 2007)
8. Organization listed in NCRP study of Conservative Organizations (NCRP 1997: 46-53)

<sup>iii</sup> Specific coding instructions were developed and a coding form prepared (see Supplemental Material S-1 and S-2, pages 2-3, and the Methodological Appendix, page 117).

<sup>iv</sup> An intercoder reliability comparison was conducted, and this resulted in a Krippendorff’s Alpha of .866.

<sup>v</sup> Detailed annual income for each organization is presented in the Supplementary Material Table S-4 (See Supplemental Material pages 5-35).

<sup>vi</sup> <http://nccs.urban.org/>

<sup>vii</sup> <http://foundationcenter.org/>

<sup>viii</sup> All grants made by the foundations to each organization were treated as income to the organization in the same year as when the foundation awarded the grant. In one case, this accounting procedure shows that one organization received more in grants than its annual contributions as reported by the IRS. Since this only occurs ones, and is for less than \$25,000, it does not significantly impact the analysis. For organizations with accounting periods that did not coincide with the calendar year, the year was assigned based on the year in with the majority of the months for the reporting period occurred. Finally, all grants were included, regardless of the specific purpose of the grant. The vast majority of the grants (88.2%) had no specific purpose identified other than “continued support.” Where specific purposes were listed, they were predominantly generic, such as “research”, “publications”, or “conferences.”

<sup>ix</sup> The consolidations that were done are as follows:

Coors Affiliated Foundations = combination of the giving of the Castle Rock& Coors Foundation.  
Scaife = sum of Sarah Scaife, Carthage, and Allegheny Foundations  
Koch = sum of Charles Koch, David Koch, and Claude B. Lambe Foundations  
Donors = sum of Donors Trust and Donors Capital
